# Supplementary material
Source: publisher figshare collection journal article supplement (https://acs.figshare.com/ndownloader/files/5809068)
Supplement: Supplementary file 1 [file 5809068]

data_FePNCO3
# start Validation Reply Form
_vrf_PLAT029_ALERT_3_C
;
PROBLEM: _diffrn_measured_fraction_theta_full value Low .      0.970 Note    
;
_vrf_PLAT911_ALERT_3_C
;
PROBLEM: Missing # FCF Refl Between THmin & STh/L=  0.600        133 Report
;
_vrf_PLAT230_ALERT_2_G
;
PROBLEM: Hirshfeld Test Diff for    O4     --  C3      ..        6.5 s.u.  
;
_vrf_PLAT232_ALERT_2_G
;
PROBLEM:  Hirshfeld Test Diff (M-X)  Fe1    --  C1      ..        7.7 s.u.  
PROBLEM:  Hirshfeld Test Diff (M-X)  Fe1    --  C2      ..        6.8 s.u.    
PROBLEM:  Hirshfeld Test Diff (M-X)  Fe1    --  C3      ..        9.5 s.u.    
;
_vrf_PLAT909_ALERT_3_G
;
PROBLEM: Percentage of Observed Data at Theta(Max) Still          83 %
;
_vrf_PLAT978_ALERT_2_G
;
PROBLEM: Number C-C Bonds with Positive Residual Density           7 Note  
;
# end Validation Reply Form
_audit_creation_date              2016-04-11
_audit_creation_method
;
Olex2 1.2
(compiled 2016.02.19 svn.r3266 for OlexSys, GUI svn.r5155)
;
_shelxl_version_number            2014-3
_publ_contact_author_address      
;
Department of Chemistry 
University of Illinois 
A328 CLSL, Box 12-6 
600 South Mathews Avenue 
Urbana, IL 61801 
;
_publ_contact_author_email        rauchfuz@illinois.edu
_publ_contact_author_name         'Thomas B. Rauchfuss'
_publ_contact_author_phone        '1  217 333 7355'
_publ_section_references
;
Bourhis, L.J., Dolomanov, O.V., Gildea, R.J., Howard, J.A.K., Puschmann, H.
 (2013). in preparation.

Bourhis, L.J., Dolomanov, O.V., Gildea, R.J., Howard, J.A.K., Puschmann, H.
 (2015). Acta Cryst. A71, 59-75.

Dolomanov, O.V., Bourhis, L.J., Gildea, R.J, Howard, J.A.K. & Puschmann, H.
 (2009), J. Appl. Cryst. 42, 339-341.

Sheldrick, G.M. (2015). Acta Cryst. C71, 3-8.
;
_publ_requested_category         FM 
 
_publ_section_figure_captions 
; 
Figure 1.  SHELXTL (Bruker, 2013) plot showing 35% probability ellipsoids 
for non-H atoms and circles of arbitrary size for H atoms. 
; 
_publ_section_exptl_prep 
; 
Crystals were grown from a concentrated pentane solution containing the target
molecule.
; 
 
_publ_section_exptl_refinement 
; 
A structural model consisting of Fe(PCHNArCl)(CO)3

H atoms were included as riding idealized 
contributors; H atom U's were assigned as 1.2 times carrier U~eq~. 
; 

_publ_requested_journal           '?' 
_publ_requested_coeditor_name     ? 
 
_publ_section_title 
; 
 ? 
; 
 
_publ_section_abstract 
; 
 ? 
; 
 
_publ_section_comment 
; 
 ? 
; 
 
_publ_section_acknowledgements 
; 
? 
; 
_chemical_name_common             ?
_chemical_name_systematic
;
 ?
;
_chemical_formula_moiety          'C28 H19 Cl Fe N O3 P'
_chemical_formula_sum             'C28 H19 Cl Fe N O3 P'
_chemical_formula_weight          539.71
_chemical_melting_point           ?
loop_
  _atom_type_symbol
  _atom_type_description
  _atom_type_scat_dispersion_real
  _atom_type_scat_dispersion_imag
  _atom_type_scat_source
 'C' 'C' 0.0181 0.0091 'International Tables Vol C Tables 4.2.6.8 and 6.1.1.4'
 'H' 'H' 0.0000 0.0000 'International Tables Vol C Tables 4.2.6.8 and 6.1.1.4'
 'N' 'N' 0.0311 0.0180 'International Tables Vol C Tables 4.2.6.8 and 6.1.1.4'
 'O' 'O' 0.0492 0.0322 'International Tables Vol C Tables 4.2.6.8 and 6.1.1.4'
 'P' 'P' 0.2955 0.4335 'International Tables Vol C Tables 4.2.6.8 and 6.1.1.4'
 'Cl' 'Cl' 0.3639 0.7018 'International Tables Vol C Tables 4.2.6.8 and 6.1.1.4'
 'Fe' 'Fe' -1.1336 3.1974
 'International Tables Vol C Tables 4.2.6.8 and 6.1.1.4'

_shelx_space_group_comment
;
The symmetry employed for this shelxl refinement is uniquely defined
by the following loop, which should always be used as a source of
symmetry information in preference to the above space-group names.
They are only intended as comments.
;
_space_group_crystal_system       'monoclinic'
_space_group_IT_number            14
_space_group_name_H-M_alt         'P 1 21/c 1'
_space_group_name_Hall            '-P 2ybc'
loop_
  _space_group_symop_operation_xyz
 'x, y, z'
 '-x, y+1/2, -z+1/2'
 '-x, -y, -z'
 'x, -y-1/2, z-1/2'

_cell_length_a                    10.4910(3)
_cell_length_b                    16.4005(5)
_cell_length_c                    14.4413(4)
_cell_angle_alpha                 90
_cell_angle_beta                  98.8312(17)
_cell_angle_gamma                 90
_cell_volume                      2455.28(12)
_cell_formula_units_Z             4
_cell_measurement_reflns_used     7118
_cell_measurement_temperature     183(2)
_cell_measurement_theta_max       66.89
_cell_measurement_theta_min       4.11
_shelx_estimated_absorpt_T_max    0.366
_shelx_estimated_absorpt_T_min    0.179
_exptl_absorpt_coefficient_mu     6.799
_exptl_absorpt_correction_T_max   0.9985
_exptl_absorpt_correction_T_min   0.7667
_exptl_absorpt_correction_type    multi-scan
_exptl_absorpt_process_details
;
SADABS-2008/1 (Bruker,2008) was used for absorption correction.
wR2(int) was 0.0834 before and 0.0610 after correction.
The Ratio of minimum to maximum transmission is 0.7679.
The \l/2 correction factor is Not present.
;
_exptl_crystal_colour             orange
_exptl_crystal_colour_primary     orange
_exptl_crystal_density_diffrn     1.460
_exptl_crystal_density_meas       ?
_exptl_crystal_density_method     ?
_exptl_crystal_description        'prism'
_exptl_crystal_F_000              1104
_exptl_crystal_size_max           0.386
_exptl_crystal_size_mid           0.247
_exptl_crystal_size_min           0.185
_exptl_crystal_preparation       
; 
The data crystal was mounted using oil (Parantone-N, Exxon) to a 
0.3 mm cryo-loop (Hampton Research) with the (0 1 -1) scattering 
planes roughly normal to the spindle axis.  
; 
_exptl_special_details 
; 
One distinct cell was identified using APEX2 (Bruker, 2013).  18
frame series were integrated and filtered for statistical outliers 
using SAINT (Bruker, 2013) then corrected for absorption by 
multiscan methods using SADABS v2012/1 (Bruker, 2012).  
No decay correction was applied.    
; 
_exptl_transmission_factor_max    ?
_exptl_transmission_factor_min    ?
_diffrn_reflns_av_R_equivalents   0.0515
_diffrn_reflns_av_unetI/netI      0.0394
_diffrn_reflns_Laue_measured_fraction_full 0.970
_diffrn_reflns_Laue_measured_fraction_max 0.970
_diffrn_reflns_limit_h_max        12
_diffrn_reflns_limit_h_min        -12
_diffrn_reflns_limit_k_max        13
_diffrn_reflns_limit_k_min        -19
_diffrn_reflns_limit_l_max        16
_diffrn_reflns_limit_l_min        -17
_diffrn_reflns_number             22019
_diffrn_reflns_point_group_measured_fraction_full 0.970
_diffrn_reflns_point_group_measured_fraction_max 0.970
_diffrn_reflns_theta_full         67.679
_diffrn_reflns_theta_max          67.664
_diffrn_reflns_theta_min          4.106
_diffrn_ambient_temperature       183.15
_diffrn_detector                  'Bruker APEXII CCD area detector'
_diffrn_detector_area_resol_mean  ?
_diffrn_detector_type             'CCD area detector'
_diffrn_measured_fraction_theta_full 0.970
_diffrn_measured_fraction_theta_max 0.970
_diffrn_measurement_device        'kappa diffractometer'
_diffrn_measurement_device_type   'Bruker APEX-II CCD'
_diffrn_measurement_method        '\f and \w scans'
_diffrn_radiation_monochromator   graphite
_diffrn_radiation_probe           x-ray
_diffrn_radiation_type            CuK\a
_diffrn_radiation_wavelength      1.54178
_diffrn_source                    'fine-focus sealed X-ray tube'
_diffrn_source_target             Cu
_diffrn_source_type               'Siemens fine-focus sealed tube'
_diffrn_standards_number          0
_reflns_Friedel_coverage          0.000
_reflns_Friedel_fraction_full     .
_reflns_Friedel_fraction_max      .
_reflns_number_gt                 3890
_reflns_number_total              4310
_reflns_special_details
;
 Reflections were merged by SHELXL according to the crystal
 class for the calculation of statistics and refinement.
 
 _reflns_Friedel_fraction is defined as the number of unique
 Friedel pairs measured divided by the number that would be
 possible theoretically, ignoring centric projections and
 systematic absences.
;
_reflns_threshold_expression      'I > 2\s(I)'
_computing_cell_refinement        'SAINT v7.68A (Bruker, 2009)'
_computing_data_collection        ?
_computing_data_reduction         'SAINT v7.68A (Bruker, 2009)'
_computing_molecular_graphics     'Olex2 (Dolomanov et al., 2009)'
_computing_publication_material   'Olex2 (Dolomanov et al., 2009)'
_computing_structure_refinement   'XL (Sheldrick, 2008)'
_computing_structure_solution     'olex2.solve (Bourhis et al., 2015)'
_refine_diff_density_max          0.477
_refine_diff_density_min          -0.351
_refine_diff_density_rms          0.069
_refine_ls_extinction_coef        .
_refine_ls_extinction_method      none
_refine_ls_goodness_of_fit_ref    1.070
_refine_ls_hydrogen_treatment     constr
_refine_ls_matrix_type            full
_refine_ls_number_parameters      316
_refine_ls_number_reflns          4310
_refine_ls_number_restraints      0
_refine_ls_R_factor_all           0.0420
_refine_ls_R_factor_gt            0.0378
_refine_ls_restrained_S_all       1.070
_refine_ls_shift/su_max           0.001
_refine_ls_shift/su_mean          0.000
_refine_ls_structure_factor_coef  Fsqd
_refine_ls_weighting_details
'w=1/[\s^2^(Fo^2^)+(0.0640P)^2^] where P=(Fo^2^+2Fc^2^)/3'
_refine_ls_weighting_scheme       calc
_refine_ls_wR_factor_gt           0.0938
_refine_ls_wR_factor_ref          0.0964
_refine_special_details          
; 
Structure was phased by direct methods (Sheldrick, 
2008).  Systematic conditions suggested the unambiguous space group.  
The space group choice was confirmed by successful convergence of the 
full-matrix least-squares refinement on F^2^.  The highest peaks in 
the final difference Fourier map were in the vicinity of Fe1;
final map had no other significant features.  A final analysis of 
variance between observed and calculated structure factors showed little
dependence on amplitude and resolution. 
; 
_olex2_refinement_description
;
1. Fixed Uiso
 At 1.2 times of:
  All C(H) groups
2.a Ternary CH refined with riding coordinates:
 C4(H4)
2.b Aromatic/amide H refined with riding coordinates:
 C6(H6), C7(H7), C8(H8), C9(H9), C12(H12), C13(H13), C14(H14), C15(H15),
 C16(H16), C18(H18), C19(H19), C20(H20), C21(H21), C22(H22), C24(H24), C25(H25),
  C27(H27), C28(H28)
;
_atom_sites_solution_hydrogens    geom
_atom_sites_solution_primary      iterative
_atom_sites_solution_secondary    ?
loop_
  _atom_site_label
  _atom_site_type_symbol
  _atom_site_fract_x
  _atom_site_fract_y
  _atom_site_fract_z
  _atom_site_U_iso_or_equiv
  _atom_site_adp_type
  _atom_site_occupancy
  _atom_site_site_symmetry_order
  _atom_site_calc_flag
  _atom_site_refinement_flags_posn
  _atom_site_refinement_flags_adp
  _atom_site_refinement_flags_occupancy
  _atom_site_disorder_assembly
  _atom_site_disorder_group
 Fe1 Fe 0.64057(3) 0.66028(2) 0.71478(2) 0.02278(12) Uani 1 1 d . . . . .
 Cl3 Cl -0.03330(5) 0.52110(5) 0.61308(5) 0.04892(18) Uani 1 1 d . . . . .
 P2 P 0.74686(5) 0.61158(3) 0.85079(3) 0.02213(14) Uani 1 1 d . . . . .
 O4 O 0.88150(17) 0.72551(12) 0.66552(13) 0.0475(4) Uani 1 1 d . . . . .
 O5 O 0.5415(2) 0.79835(10) 0.81281(13) 0.0472(4) Uani 1 1 d . . . . .
 O7 O 0.5026(2) 0.69616(13) 0.52638(12) 0.0570(5) Uani 1 1 d . . . . .
 N6 N 0.52612(16) 0.56606(10) 0.72673(11) 0.0237(3) Uani 1 1 d . . . . .
 C1 C 0.5555(2) 0.68409(15) 0.59930(16) 0.0344(5) Uani 1 1 d . . . . .
 C2 C 0.5793(2) 0.74507(13) 0.77423(15) 0.0299(5) Uani 1 1 d . . . . .
 C3 C 0.7887(2) 0.69929(14) 0.68530(15) 0.0326(5) Uani 1 1 d . . . . .
 C4 C 0.62298(19) 0.53814(13) 0.68011(13) 0.0252(4) Uani 1 1 d . . . . .
 H4 H 0.5975 0.5253 0.6121 0.030 Uiso 1 1 calc R . . . .
 C5 C 0.71920(19) 0.48261(12) 0.73418(14) 0.0246(4) Uani 1 1 d . . . . .
 C6 C 0.7434(2) 0.40525(14) 0.70216(15) 0.0313(5) Uani 1 1 d . . . . .
 H6 H 0.7037 0.3882 0.6417 0.038 Uiso 1 1 calc R . . . .
 C7 C 0.8256(2) 0.35272(14) 0.75817(17) 0.0371(5) Uani 1 1 d . . . . .
 H7 H 0.8435 0.3003 0.7352 0.045 Uiso 1 1 calc R . . . .
 C8 C 0.8817(2) 0.37609(15) 0.84725(17) 0.0376(5) Uani 1 1 d . . . . .
 H8 H 0.9364 0.3393 0.8856 0.045 Uiso 1 1 calc R . . . .
 C9 C 0.8583(2) 0.45282(14) 0.88042(15) 0.0317(5) Uani 1 1 d . . . . .
 H9 H 0.8953 0.4687 0.9420 0.038 Uiso 1 1 calc R . . . .
 C10 C 0.78007(19) 0.50665(12) 0.82280(14) 0.0243(4) Uani 1 1 d . . . . .
 C11 C 0.9017(2) 0.65996(13) 0.89201(14) 0.0275(5) Uani 1 1 d . . . . .
 C12 C 1.0179(2) 0.62752(16) 0.87571(15) 0.0332(5) Uani 1 1 d . . . . .
 H12 H 1.0195 0.5765 0.8448 0.040 Uiso 1 1 calc R . . . .
 C13 C 1.1321(2) 0.66933(18) 0.90434(17) 0.0428(6) Uani 1 1 d . . . . .
 H13 H 1.2117 0.6464 0.8936 0.051 Uiso 1 1 calc R . . . .
 C14 C 1.1308(2) 0.74414(17) 0.94839(16) 0.0437(6) Uani 1 1 d . . . . .
 H14 H 1.2094 0.7721 0.9687 0.052 Uiso 1 1 calc R . . . .
 C15 C 1.0145(3) 0.77834(16) 0.96284(16) 0.0418(6) Uani 1 1 d . . . . .
 H15 H 1.0131 0.8303 0.9918 0.050 Uiso 1 1 calc R . . . .
 C16 C 0.9007(2) 0.73646(14) 0.93488(15) 0.0337(5) Uani 1 1 d . . . . .
 H16 H 0.8211 0.7598 0.9449 0.040 Uiso 1 1 calc R . . . .
 C17 C 0.6695(2) 0.60705(12) 0.95573(13) 0.0255(4) Uani 1 1 d . . . . .
 C18 C 0.7435(2) 0.59325(16) 1.04288(15) 0.0373(5) Uani 1 1 d . . . . .
 H18 H 0.8348 0.5907 1.0483 0.045 Uiso 1 1 calc R . . . .
 C19 C 0.6847(3) 0.58325(16) 1.12171(16) 0.0421(6) Uani 1 1 d . . . . .
 H19 H 0.7357 0.5735 1.1809 0.051 Uiso 1 1 calc R . . . .
 C20 C 0.5521(2) 0.58736(15) 1.11437(15) 0.0369(5) Uani 1 1 d . . . . .
 H20 H 0.5119 0.5803 1.1685 0.044 Uiso 1 1 calc R . . . .
 C21 C 0.4782(2) 0.60168(14) 1.02881(16) 0.0346(5) Uani 1 1 d . . . . .
 H21 H 0.3871 0.6049 1.0241 0.042 Uiso 1 1 calc R . . . .
 C22 C 0.5362(2) 0.61148(13) 0.94897(15) 0.0295(5) Uani 1 1 d . . . . .
 H22 H 0.4846 0.6212 0.8900 0.035 Uiso 1 1 calc R . . . .
 C23 C 0.39686(19) 0.56087(13) 0.68756(13) 0.0250(4) Uani 1 1 d . . . . .
 C24 C 0.3485(2) 0.48955(14) 0.64098(15) 0.0307(5) Uani 1 1 d . . . . .
 H24 H 0.4065 0.4488 0.6262 0.037 Uiso 1 1 calc R . . . .
 C25 C 0.2169(2) 0.47823(15) 0.61644(16) 0.0354(5) Uani 1 1 d . . . . .
 H25 H 0.1849 0.4294 0.5859 0.042 Uiso 1 1 calc R . . . .
 C26 C 0.1321(2) 0.53780(15) 0.63632(15) 0.0333(5) Uani 1 1 d . . . . .
 C27 C 0.1774(2) 0.61028(15) 0.67706(15) 0.0333(5) Uani 1 1 d . . . . .
 H27 H 0.1188 0.6522 0.6876 0.040 Uiso 1 1 calc R . . . .
 C28 C 0.3087(2) 0.62165(14) 0.70252(15) 0.0308(5) Uani 1 1 d . . . . .
 H28 H 0.3396 0.6717 0.7307 0.037 Uiso 1 1 calc R . . . .

loop_
  _atom_site_aniso_label
  _atom_site_aniso_U_11
  _atom_site_aniso_U_22
  _atom_site_aniso_U_33
  _atom_site_aniso_U_23
  _atom_site_aniso_U_13
  _atom_site_aniso_U_12
 Fe1 0.02443(18) 0.02342(19) 0.02031(17) 0.00214(11) 0.00289(12) 0.00078(12)
 Cl3 0.0251(3) 0.0668(4) 0.0548(4) -0.0050(3) 0.0058(2) -0.0103(3)
 P2 0.0230(2) 0.0237(3) 0.0195(2) 0.00051(17) 0.00273(18) -0.00025(19)
 O4 0.0364(9) 0.0565(11) 0.0531(11) 0.0167(9) 0.0177(8) -0.0054(8)
 O5 0.0659(12) 0.0305(9) 0.0477(10) -0.0045(7) 0.0170(9) 0.0106(9)
 O7 0.0772(14) 0.0564(12) 0.0311(10) 0.0121(8) -0.0113(9) -0.0014(11)
 N6 0.0240(8) 0.0232(9) 0.0236(8) -0.0003(6) 0.0022(6) -0.0023(7)
 C1 0.0415(12) 0.0319(12) 0.0292(12) 0.0036(9) 0.0037(10) -0.0009(10)
 C2 0.0325(11) 0.0281(11) 0.0289(10) 0.0035(9) 0.0038(8) 0.0008(9)
 C3 0.0362(12) 0.0338(12) 0.0278(10) 0.0061(9) 0.0044(9) 0.0013(10)
 C4 0.0295(10) 0.0262(10) 0.0199(9) -0.0019(7) 0.0038(7) -0.0008(8)
 C5 0.0231(9) 0.0241(10) 0.0277(10) 0.0008(8) 0.0074(8) -0.0009(8)
 C6 0.0338(11) 0.0315(11) 0.0299(10) -0.0033(9) 0.0091(9) 0.0008(9)
 C7 0.0453(13) 0.0248(12) 0.0431(13) -0.0002(9) 0.0125(11) 0.0056(10)
 C8 0.0407(12) 0.0321(13) 0.0400(12) 0.0108(9) 0.0064(10) 0.0113(10)
 C9 0.0327(11) 0.0316(12) 0.0298(10) 0.0042(9) 0.0020(9) 0.0036(9)
 C10 0.0262(9) 0.0230(10) 0.0249(9) 0.0013(8) 0.0073(8) 0.0003(8)
 C11 0.0289(10) 0.0327(12) 0.0201(10) 0.0045(7) 0.0017(8) -0.0047(9)
 C12 0.0301(11) 0.0436(13) 0.0261(10) 0.0015(9) 0.0051(8) -0.0029(10)
 C13 0.0294(12) 0.0668(18) 0.0328(12) 0.0086(11) 0.0067(9) -0.0054(11)
 C14 0.0392(13) 0.0585(17) 0.0301(11) 0.0100(11) -0.0055(9) -0.0222(12)
 C15 0.0502(14) 0.0392(14) 0.0328(12) 0.0020(10) -0.0041(10) -0.0135(12)
 C16 0.0364(11) 0.0333(12) 0.0299(11) 0.0024(9) 0.0010(9) -0.0026(10)
 C17 0.0317(10) 0.0232(10) 0.0221(9) -0.0004(7) 0.0060(8) -0.0028(8)
 C18 0.0369(12) 0.0480(14) 0.0263(11) 0.0027(9) 0.0030(9) -0.0045(11)
 C19 0.0547(15) 0.0492(15) 0.0216(10) 0.0031(10) 0.0029(10) -0.0107(12)
 C20 0.0519(14) 0.0344(12) 0.0279(11) -0.0036(9) 0.0170(10) -0.0091(11)
 C21 0.0375(12) 0.0331(12) 0.0361(12) -0.0025(9) 0.0148(10) -0.0032(10)
 C22 0.0333(11) 0.0286(12) 0.0272(10) -0.0003(8) 0.0063(9) -0.0003(9)
 C23 0.0251(9) 0.0291(11) 0.0201(9) 0.0031(7) 0.0010(7) -0.0006(9)
 C24 0.0288(10) 0.0293(11) 0.0330(11) 0.0004(8) 0.0012(8) 0.0016(9)
 C25 0.0347(11) 0.0332(12) 0.0359(12) -0.0003(9) -0.0017(9) -0.0056(10)
 C26 0.0247(10) 0.0476(14) 0.0271(10) 0.0032(9) 0.0027(8) -0.0051(10)
 C27 0.0275(10) 0.0412(13) 0.0316(11) 0.0005(9) 0.0057(9) 0.0040(10)
 C28 0.0288(11) 0.0318(12) 0.0313(11) -0.0024(8) 0.0035(8) 0.0006(9)

_geom_special_details
;
 All esds (except the esd in the dihedral angle between two l.s. planes)
 are estimated using the full covariance matrix.  The cell esds are taken
 into account individually in the estimation of esds in distances, angles
 and torsion angles; correlations between esds in cell parameters are only
 used when they are defined by crystal symmetry.  An approximate (isotropic)
 treatment of cell esds is used for estimating esds involving l.s. planes.
;
loop_
  _geom_bond_atom_site_label_1
  _geom_bond_atom_site_label_2
  _geom_bond_distance
  _geom_bond_site_symmetry_2
  _geom_bond_publ_flag
 Fe1 P2 2.2510(5) . ?
 Fe1 N6 1.9807(17) . ?
 Fe1 C1 1.809(2) . ?
 Fe1 C2 1.804(2) . ?
 Fe1 C3 1.791(2) . ?
 Fe1 C4 2.066(2) . ?
 Cl3 C26 1.738(2) . ?
 P2 C10 1.814(2) . ?
 P2 C11 1.823(2) . ?
 P2 C17 1.827(2) . ?
 O4 C3 1.140(3) . ?
 O5 C2 1.140(3) . ?
 O7 C1 1.130(3) . ?
 N6 C4 1.380(3) . ?
 N6 C23 1.389(3) . ?
 C4 C5 1.489(3) . ?
 C5 C6 1.387(3) . ?
 C5 C10 1.397(3) . ?
 C6 C7 1.388(3) . ?
 C7 C8 1.384(4) . ?
 C8 C9 1.382(3) . ?
 C9 C10 1.391(3) . ?
 C11 C12 1.384(3) . ?
 C11 C16 1.400(3) . ?
 C12 C13 1.387(3) . ?
 C13 C14 1.383(4) . ?
 C14 C15 1.387(4) . ?
 C15 C16 1.383(3) . ?
 C17 C18 1.392(3) . ?
 C17 C22 1.389(3) . ?
 C18 C19 1.385(3) . ?
 C19 C20 1.380(4) . ?
 C20 C21 1.374(4) . ?
 C21 C22 1.393(3) . ?
 C23 C24 1.405(3) . ?
 C23 C28 1.399(3) . ?
 C24 C25 1.383(3) . ?
 C25 C26 1.381(4) . ?
 C26 C27 1.378(3) . ?
 C27 C28 1.383(3) . ?

loop_
  _geom_angle_atom_site_label_1
  _geom_angle_atom_site_label_2
  _geom_angle_atom_site_label_3
  _geom_angle
  _geom_angle_site_symmetry_1
  _geom_angle_site_symmetry_3
  _geom_angle_publ_flag
 N6 Fe1 P2 82.69(5) . . ?
 N6 Fe1 C4 39.82(7) . . ?
 C1 Fe1 P2 171.54(8) . . ?
 C1 Fe1 N6 91.67(9) . . ?
 C1 Fe1 C4 88.44(9) . . ?
 C2 Fe1 P2 91.33(7) . . ?
 C2 Fe1 N6 107.15(8) . . ?
 C2 Fe1 C1 96.38(10) . . ?
 C2 Fe1 C4 146.90(9) . . ?
 C3 Fe1 P2 90.14(7) . . ?
 C3 Fe1 N6 149.20(9) . . ?
 C3 Fe1 C1 91.54(10) . . ?
 C3 Fe1 C2 102.90(10) . . ?
 C3 Fe1 C4 109.70(9) . . ?
 C4 Fe1 P2 83.18(6) . . ?
 C10 P2 Fe1 103.21(7) . . ?
 C10 P2 C11 107.08(10) . . ?
 C10 P2 C17 105.74(9) . . ?
 C11 P2 Fe1 115.31(7) . . ?
 C11 P2 C17 103.52(9) . . ?
 C17 P2 Fe1 120.97(7) . . ?
 C4 N6 Fe1 73.43(11) . . ?
 C4 N6 C23 121.77(16) . . ?
 C23 N6 Fe1 125.38(13) . . ?
 O7 C1 Fe1 177.6(2) . . ?
 O5 C2 Fe1 179.2(2) . . ?
 O4 C3 Fe1 178.5(2) . . ?
 N6 C4 Fe1 66.75(11) . . ?
 N6 C4 C5 115.96(17) . . ?
 C5 C4 Fe1 115.97(14) . . ?
 C6 C5 C4 121.94(19) . . ?
 C6 C5 C10 118.84(19) . . ?
 C10 C5 C4 119.06(18) . . ?
 C5 C6 C7 120.2(2) . . ?
 C8 C7 C6 120.5(2) . . ?
 C9 C8 C7 120.1(2) . . ?
 C8 C9 C10 119.4(2) . . ?
 C5 C10 P2 113.31(15) . . ?
 C9 C10 P2 125.78(16) . . ?
 C9 C10 C5 120.91(19) . . ?
 C12 C11 P2 122.78(17) . . ?
 C12 C11 C16 119.1(2) . . ?
 C16 C11 P2 117.90(17) . . ?
 C11 C12 C13 120.2(2) . . ?
 C14 C13 C12 120.4(2) . . ?
 C13 C14 C15 119.9(2) . . ?
 C16 C15 C14 119.7(2) . . ?
 C15 C16 C11 120.7(2) . . ?
 C18 C17 P2 119.96(16) . . ?
 C22 C17 P2 120.69(16) . . ?
 C22 C17 C18 119.20(19) . . ?
 C19 C18 C17 120.3(2) . . ?
 C20 C19 C18 120.1(2) . . ?
 C21 C20 C19 120.0(2) . . ?
 C20 C21 C22 120.4(2) . . ?
 C17 C22 C21 119.9(2) . . ?
 N6 C23 C24 120.29(19) . . ?
 N6 C23 C28 121.37(19) . . ?
 C28 C23 C24 117.92(19) . . ?
 C25 C24 C23 120.5(2) . . ?
 C26 C25 C24 120.1(2) . . ?
 C25 C26 Cl3 120.31(18) . . ?
 C27 C26 Cl3 119.14(18) . . ?
 C27 C26 C25 120.5(2) . . ?
 C26 C27 C28 119.6(2) . . ?
 C27 C28 C23 121.2(2) . . ?

_shelx_res_file
;
TITL
CELL 1.54178 10.491 16.4005 14.4413 90 98.8312 90
ZERR 4 0.0003 0.0005 0.0004 0 0.0017 0
LATT 1
SYMM -X,0.5+Y,0.5-Z
SFAC C H N O P Cl Fe
UNIT 112 76 4 12 4 4 4

L.S. 4 0 0
PLAN  20
SIZE 0.185 0.247 0.386
TEMP -90
fmap 2 53
acta
REM <olex2.extras>
REM <HklSrc "%.\\fc75a_0m.hkl">
REM </olex2.extras>

WGHT    0.064000
FVAR       0.13737
FE1   7    0.640565    0.660280    0.714775    11.00000    0.02443    0.02342 =
         0.02031    0.00214    0.00289    0.00078
CL3   6   -0.033305    0.521102    0.613083    11.00000    0.02507    0.06682 =
         0.05478   -0.00504    0.00582   -0.01030
P2    5    0.746855    0.611584    0.850793    11.00000    0.02302    0.02372 =
         0.01949    0.00051    0.00273   -0.00025
O4    4    0.881500    0.725513    0.665519    11.00000    0.03639    0.05648 =
         0.05311    0.01673    0.01766   -0.00544
O5    4    0.541462    0.798349    0.812811    11.00000    0.06594    0.03050 =
         0.04772   -0.00451    0.01704    0.01062
O7    4    0.502614    0.696164    0.526380    11.00000    0.07720    0.05644 =
         0.03108    0.01213   -0.01130   -0.00141
N6    3    0.526123    0.566055    0.726735    11.00000    0.02396    0.02317 =
         0.02364   -0.00030    0.00220   -0.00230
C1    1    0.555542    0.684086    0.599304    11.00000    0.04146    0.03186 =
         0.02925    0.00356    0.00374   -0.00088
C2    1    0.579299    0.745073    0.774227    11.00000    0.03252    0.02812 =
         0.02886    0.00352    0.00382    0.00077
C3    1    0.788680    0.699286    0.685299    11.00000    0.03617    0.03380 =
         0.02777    0.00610    0.00436    0.00128
C4    1    0.622981    0.538142    0.680109    11.00000    0.02945    0.02619 =
         0.01992   -0.00188    0.00385   -0.00082
AFIX  13
H4    2    0.597501    0.525256    0.612104    11.00000   -1.20000
AFIX   0
C5    1    0.719197    0.482606    0.734179    11.00000    0.02308    0.02413 =
         0.02770    0.00079    0.00740   -0.00088
C6    1    0.743441    0.405247    0.702163    11.00000    0.03377    0.03152 =
         0.02989   -0.00335    0.00912    0.00079
AFIX  43
H6    2    0.703662    0.388179    0.641724    11.00000   -1.20000
AFIX   0
C7    1    0.825635    0.352721    0.758170    11.00000    0.04528    0.02480 =
         0.04308   -0.00024    0.01250    0.00565
AFIX  43
H7    2    0.843528    0.300336    0.735201    11.00000   -1.20000
AFIX   0
C8    1    0.881738    0.376091    0.847247    11.00000    0.04068    0.03212 =
         0.04003    0.01079    0.00641    0.01127
AFIX  43
H8    2    0.936434    0.339329    0.885641    11.00000   -1.20000
AFIX   0
C9    1    0.858306    0.452822    0.880417    11.00000    0.03272    0.03161 =
         0.02982    0.00416    0.00197    0.00355
AFIX  43
H9    2    0.895273    0.468665    0.941982    11.00000   -1.20000
AFIX   0
C10   1    0.780067    0.506653    0.822802    11.00000    0.02616    0.02301 =
         0.02487    0.00128    0.00727    0.00032
C11   1    0.901655    0.659963    0.892010    11.00000    0.02889    0.03274 =
         0.02014    0.00447    0.00173   -0.00472
C12   1    1.017915    0.627519    0.875710    11.00000    0.03006    0.04364 =
         0.02613    0.00150    0.00510   -0.00294
AFIX  43
H12   2    1.019544    0.576471    0.844825    11.00000   -1.20000
AFIX   0
C13   1    1.132089    0.669326    0.904340    11.00000    0.02942    0.06677 =
         0.03280    0.00856    0.00674   -0.00537
AFIX  43
H13   2    1.211712    0.646423    0.893623    11.00000   -1.20000
AFIX   0
C14   1    1.130789    0.744136    0.948387    11.00000    0.03924    0.05846 =
         0.03007    0.00999   -0.00555   -0.02219
AFIX  43
H14   2    1.209439    0.772069    0.968722    11.00000   -1.20000
AFIX   0
C15   1    1.014528    0.778340    0.962843    11.00000    0.05016    0.03919 =
         0.03279    0.00197   -0.00407   -0.01345
AFIX  43
H15   2    1.013097    0.830272    0.991806    11.00000   -1.20000
AFIX   0
C16   1    0.900703    0.736458    0.934878    11.00000    0.03643    0.03334 =
         0.02989    0.00239    0.00097   -0.00257
AFIX  43
H16   2    0.821085    0.759839    0.944862    11.00000   -1.20000
AFIX   0
C17   1    0.669489    0.607052    0.955726    11.00000    0.03173    0.02316 =
         0.02207   -0.00038    0.00599   -0.00281
C18   1    0.743489    0.593252    1.042880    11.00000    0.03692    0.04797 =
         0.02629    0.00270    0.00296   -0.00455
AFIX  43
H18   2    0.834801    0.590681    1.048329    11.00000   -1.20000
AFIX   0
C19   1    0.684666    0.583247    1.121710    11.00000    0.05465    0.04924 =
         0.02155    0.00313    0.00290   -0.01066
AFIX  43
H19   2    0.735675    0.573539    1.180926    11.00000   -1.20000
AFIX   0
C20   1    0.552078    0.587360    1.114365    11.00000    0.05193    0.03440 =
         0.02795   -0.00364    0.01703   -0.00907
AFIX  43
H20   2    0.511887    0.580292    1.168455    11.00000   -1.20000
AFIX   0
C21   1    0.478236    0.601679    1.028810    11.00000    0.03754    0.03314 =
         0.03605   -0.00248    0.01483   -0.00317
AFIX  43
H21   2    0.387052    0.604915    1.024076    11.00000   -1.20000
AFIX   0
C22   1    0.536209    0.611481    0.948970    11.00000    0.03331    0.02858 =
         0.02716   -0.00035    0.00632   -0.00025
AFIX  43
H22   2    0.484623    0.621184    0.889974    11.00000   -1.20000
AFIX   0
C23   1    0.396862    0.560867    0.687562    11.00000    0.02510    0.02912 =
         0.02009    0.00307    0.00103   -0.00057
C24   1    0.348461    0.489549    0.640983    11.00000    0.02884    0.02929 =
         0.03298    0.00038    0.00121    0.00162
AFIX  43
H24   2    0.406477    0.448791    0.626228    11.00000   -1.20000
AFIX   0
C25   1    0.216929    0.478234    0.616443    11.00000    0.03471    0.03320 =
         0.03592   -0.00025   -0.00173   -0.00562
AFIX  43
H25   2    0.184927    0.429435    0.585883    11.00000   -1.20000
AFIX   0
C26   1    0.132109    0.537797    0.636320    11.00000    0.02468    0.04760 =
         0.02708    0.00320    0.00271   -0.00508
C27   1    0.177404    0.610281    0.677064    11.00000    0.02749    0.04120 =
         0.03160    0.00054    0.00571    0.00403
AFIX  43
H27   2    0.118766    0.652181    0.687594    11.00000   -1.20000
AFIX   0
C28   1    0.308698    0.621655    0.702524    11.00000    0.02885    0.03180 =
         0.03128   -0.00236    0.00354    0.00064
AFIX  43
H28   2    0.339606    0.671654    0.730689    11.00000   -1.20000
AFIX   0
HKLF 4

REM
REM R1 =  0.0378 for    3890 Fo > 4sig(Fo)  and  0.0420 for all    4310 data
REM    316 parameters refined using      0 restraints

END

WGHT      0.0642      0.0000

REM Highest difference peak  0.477,  deepest hole -0.351,  1-sigma level  0.069
Q1    1   0.6257  0.6567  0.6407  11.00000  0.05    0.48
Q2    1   0.7076  0.6269  0.7829  11.00000  0.05    0.45
Q3    1   0.6515  0.6726  0.7824  11.00000  0.05    0.44
Q4    1   0.6744  0.6341  0.7932  11.00000  0.05    0.44
Q5    1   0.7391  0.6638  0.7244  11.00000  0.05    0.43
Q6    1   0.5591  0.6404  0.6756  11.00000  0.05    0.41
Q7    1   0.5791  0.6985  0.7463  11.00000  0.05    0.40
Q8    1   0.7236  0.6018  0.9171  11.00000  0.05    0.38
Q9    1   0.5781  0.6187  0.7382  11.00000  0.05    0.36
Q10   1   0.6993  0.6971  0.6835  11.00000  0.05    0.35
Q11   1   0.8303  0.6341  0.8707  11.00000  0.05    0.34
Q12   1   0.7694  0.5532  0.8453  11.00000  0.05    0.34
Q13   1   0.7742  0.4999  0.7650  11.00000  0.05    0.31
Q14   1   0.0558  0.5358  0.6209  11.00000  0.05    0.30
Q15   1   0.6842  0.7195  0.7136  11.00000  0.05    0.30
Q16   1   0.6736  0.6269  0.6636  11.00000  0.05    0.29
Q17   1  -0.0285  0.5107  0.5474  11.00000  0.05    0.28
Q18   1   0.6642  0.6020  0.7113  11.00000  0.05    0.27
Q19   1   0.2840  0.4785  0.6556  11.00000  0.05    0.27
Q20   1   1.1324  0.6859  0.9323  11.00000  0.05    0.25
;
_shelx_res_checksum               22899
_shelx_hkl_file
;
  -1   0   0   59.09    2.88
   1   0   0   59.55    3.83
   1   0   0   60.54    2.88
   1   0   0   52.81    3.16
  -1   0   0   60.65    3.83
   2   0   0    1.54    0.22
  -2   0   0    1.72    0.32
   2   0   0    1.45    0.34
   3   0   0   13.85    0.86
   3   0   0   13.08    1.22
   4   0   0    1.39    0.53
   4   0   0    1.83    0.34
  -6   0   0   22.21    1.59
   6   0   0   24.87    1.56
   7   0   0    5.96    0.76
  -7   0   0    5.86    0.76
   7   0   0    4.64    0.64
   8   0   0  119.60    5.77
   8   0   0  110.35    6.58
  -8   0   0  121.62    6.69
   8   0   0  114.11    6.38
   9   0   0   11.65    1.20
   9   0   0    8.61    0.92
   9   0   0   10.60    0.95
  -9   0   0   12.25    1.26
   9   0   0   11.33    1.18
  10   0   0   36.74    2.41
 -10   0   0   37.00    2.52
  10   0   0   36.07    2.45
  10   0   0   35.70    2.17
  10   0   0   38.80    2.14
  11   0   0    3.20    0.64
  11   0   0    3.37    0.71
  11   0   0    3.58    0.58
  11   0   0    4.38    0.64
  12   0   0    7.97    0.69
  12   0   0    6.94    0.62
   0  -1   0    0.15    0.05
   0  -1   0    0.47    0.09
   0  -1   0    0.35    0.08
   0   1   0    0.23    0.06
   0   1   0    0.19    0.06
   1  -1   0  288.70   13.65
   1  -1   0  285.81   15.28
   1  -1   0  278.32   18.10
  -1  -1   0  276.59   15.26
  -1  -1   0  301.64   18.12
  -1   1   0  286.73   18.10
  -1   1   0  273.86   13.65
   1   1   0  266.05   18.10
   1   1   0  289.18   13.66
   1   1   0  273.05   18.10
   2  -1   0  524.23   27.77
   2  -1   0  504.68   24.84
   2  -1   0  518.95   32.96
  -2  -1   0  539.85   32.96
  -2   1   0  518.15   32.94
  -2   1   0  478.01   24.85
   2   1   0  507.13   32.95
   3  -1   0   73.07    5.64
   3  -1   0   90.91    4.58
   3  -1   0   83.01    4.21
  -3  -1   0   85.31    5.67
   3   1   0   81.88    4.22
   3   1   0   83.57    5.68
   4  -1   0    0.66    0.44
   4  -1   0    0.68    0.25
   4   1   0    1.34    0.51
   4   1   0    0.44    0.26
   5  -1   0   25.91    2.29
  -6  -1   0    4.70    0.62
   6  -1   0    4.79    0.57
  -6   1   0    5.03    0.63
   6   1   0    5.37    0.63
   7  -1   0    8.83    0.86
  -7  -1   0    8.10    0.90
   7  -1   0   10.02    0.96
   7   1   0    7.35    0.84
   7   1   0    9.61    0.92
  -7   1   0    9.95    0.94
   8  -1   0   69.80    3.59
   8  -1   0   69.26    4.01
   8  -1   0   68.24    3.72
   8  -1   0   71.33    4.11
  -8  -1   0   69.61    4.18
  -8   1   0   72.87    4.21
   8   1   0   68.60    4.04
   8   1   0   66.25    3.59
   8   1   0   70.84    4.15
   9  -1   0   18.40    1.52
   9  -1   0   16.82    1.27
   9  -1   0   16.44    1.41
   9  -1   0   16.56    1.29
  -9  -1   0   17.90    1.49
   9   1   0   16.59    1.52
   9   1   0   16.29    1.43
   9   1   0   17.20    1.29
  -9   1   0   16.61    1.49
  10  -1   0    4.27    0.83
 -10  -1   0    3.14    0.66
  10  -1   0    4.00    0.70
  10  -1   0    4.67    0.68
  10  -1   0    4.46    0.67
 -10  -1   0    2.97    0.73
 -10   1   0    2.08    0.65
  10   1   0    2.70    0.67
  10   1   0    2.30    0.74
  10   1   0    4.75    0.68
  10   1   0    4.59    0.70
  11  -1   0    5.36    0.65
  11  -1   0    5.05    0.62
 -11  -1   0    3.56    0.60
 -11  -1   0    3.08    0.66
  11  -1   0    5.71    0.72
  11  -1   0    4.24    0.45
  11  -1   0    4.39    0.74
  11   1   0    3.68    0.70
  11   1   0    5.57    0.66
  11   1   0    3.95    0.60
  12  -1   0   12.46    0.86
  12  -1   0   11.05    0.80
  12   1   0   11.96    0.87
  12   1   0   11.54    0.82
   0  -2   0   57.85    3.69
   0  -2   0   58.23    3.68
   0  -2   0   51.84    3.08
   0   2   0   54.55    3.66
   0   2   0   57.69    3.66
  -1  -2   0    2.31    0.20
  -1  -2   0    2.24    0.33
  -1  -2   0    1.53    0.27
   1  -2   0    2.21    0.31
   1  -2   0    2.54    0.19
   1   2   0    2.18    0.21
   1   2   0    2.28    0.31
  -1   2   0    2.78    0.30
  -1   2   0    2.28    0.32
   1   2   0    3.12    0.37
  -1   2   0    2.45    0.19
   2  -2   0   99.38    4.75
  -2  -2   0   99.53    6.37
  -2  -2   0   87.25    5.22
   2  -2   0   99.97    5.27
   2  -2   0   95.26    6.36
  -2   2   0   96.70    4.76
   2   2   0   93.82    4.76
   2   2   0   96.48    6.36
  -3  -2   0  118.26    7.54
   3  -2   0  119.33    6.17
   3  -2   0  101.77    7.49
   3  -2   0  111.02    5.60
   3   2   0  106.96    5.62
   3   2   0  115.53    7.53
   4  -2   0  136.19    9.02
   4  -2   0  136.18    6.69
   4   2   0  133.05    9.00
   4   2   0  127.84    6.71
   5  -2   0   19.65    1.90
   6  -2   0   -0.05    0.25
  -6  -2   0    0.48    0.30
   6   2   0    0.14    0.30
  -7  -2   0    0.64    0.40
   7  -2   0    1.18    0.41
   7  -2   0    1.40    0.45
  -7  -2   0    0.95    0.36
   7   2   0    1.04    0.46
   7   2   0    1.47    0.47
   8  -2   0    1.09    0.44
  -8  -2   0    0.89    0.50
  -8  -2   0    0.40    0.34
  -8  -2   0    0.71    0.43
   8  -2   0    0.70    0.40
   8  -2   0    0.31    0.49
   8  -2   0   -0.08    0.42
   8   2   0    0.74    0.50
   8   2   0    0.55    0.51
   8   2   0    1.04    0.45
  -9  -2   0   13.84    1.36
   9  -2   0   12.64    1.10
   9  -2   0   15.81    1.37
  -9  -2   0   13.88    1.14
   9  -2   0   13.82    1.13
   9  -2   0   12.43    1.22
  -9  -2   0   12.74    1.03
   9   2   0   13.48    1.33
   9   2   0   13.63    1.34
   9   2   0   14.32    1.14
 -10  -2   0    2.51    0.59
  10  -2   0    2.31    0.57
  10  -2   0    3.13    0.46
  10  -2   0    2.02    0.66
 -10  -2   0    3.77    0.58
 -10  -2   0    3.61    0.77
  10  -2   0    3.74    0.67
  10  -2   0    2.92    0.57
  10   2   0    2.77    0.64
  10   2   0    3.66    0.82
  10   2   0    4.40    0.78
  11  -2   0    8.50    0.56
 -11  -2   0    8.85    0.85
  11  -2   0    9.89    0.85
  11  -2   0    8.70    0.91
 -11  -2   0    7.47    0.75
  11  -2   0    8.78    0.79
  11  -2   0    9.64    0.57
  11   2   0    9.77    0.85
  11   2   0    7.97    0.98
 -12  -2   0    2.88    0.40
  12  -2   0    2.31    0.38
  12  -2   0    2.43    0.40
   0  -3   0    0.09    0.17
   0  -3   0    1.33    0.27
   0  -3   0   -0.07    0.10
   0   3   0    0.32    0.16
   0   3   0    0.15    0.15
  -1  -3   0    1.23    0.30
   1  -3   0    1.43    0.21
   1  -3   0    1.90    0.31
  -1  -3   0    1.01    0.26
  -1  -3   0    1.00    0.17
   1  -3   0    1.51    0.29
   1  -3   0    1.56    0.17
   1   3   0    1.02    0.24
  -1   3   0    1.53    0.29
   1   3   0    1.44    0.18
  -1   3   0    1.31    0.14
   2  -3   0  160.75    8.28
   2  -3   0  147.11    9.88
  -2  -3   0  143.87    8.23
  -2  -3   0  165.13    9.93
   2  -3   0  154.37    7.40
   2   3   0  150.28    9.88
  -2   3   0  149.71    7.41
  -2   3   0  139.28    9.87
   2   3   0  148.82    7.43
  -3  -3   0  100.04    5.95
   3  -3   0   80.34    5.87
   3  -3   0   91.40    4.81
   3  -3   0   89.19    4.36
  -3  -3   0   81.93    4.72
   3   3   0   83.66    5.87
   3   3   0   86.61    4.39
  -3   3   0   79.73    5.85
   4  -3   0   32.66    1.75
   4  -3   0   30.86    1.81
   4  -3   0   32.15    2.47
   4   3   0   26.50    1.75
  -5  -3   0   37.80    2.29
   5  -3   0   38.00    2.24
   5  -3   0   40.25    3.14
  -6  -3   0   13.53    0.99
   6  -3   0   14.59    1.05
  -6  -3   0   14.31    1.10
  -7  -3   0    3.99    0.63
  -7  -3   0    3.31    0.52
   7  -3   0    2.59    0.51
   7  -3   0    3.77    0.57
  -8  -3   0    2.01    0.62
   8  -3   0    3.17    0.59
   8  -3   0    3.12    0.52
   8  -3   0    1.74    0.47
  -8  -3   0    2.18    0.52
   8  -3   0    2.09    0.57
  -8  -3   0    1.47    0.42
   8   3   0    1.36    0.56
   8   3   0    1.50    0.59
   9  -3   0   32.01    1.82
  -9  -3   0   29.20    1.95
  -9  -3   0   29.21    2.17
   9  -3   0   33.39    2.12
   9  -3   0   33.12    2.09
   9  -3   0   28.28    1.86
  -9  -3   0   30.25    1.86
   9   3   0   32.91    2.22
   9   3   0   28.99    2.16
 -10  -3   0    0.42    0.55
  10  -3   0    0.83    0.50
  10  -3   0    0.82    0.47
 -10  -3   0    0.52    0.46
  10  -3   0    0.60    0.31
  10  -3   0    0.69    0.48
 -10  -3   0    0.47    0.41
  10  -3   0    0.61    0.56
  10   3   0    0.01    0.60
  10   3   0    0.18    0.58
 -11  -3   0    4.33    0.43
  11  -3   0    5.15    0.58
 -11  -3   0    4.46    0.59
  11  -3   0    3.44    0.60
  11  -3   0    3.21    0.52
 -11  -3   0    3.33    0.55
  11   3   0    4.04    0.75
  12  -3   0   -0.07    0.27
  12  -3   0    0.05    0.29
 -12  -3   0   -0.14    0.26
   0  -4   0   93.94    6.14
   0  -4   0   97.82    6.16
   0  -4   0   91.65    5.15
   0   4   0   94.24    6.10
   0   4   0   88.63    4.54
  -1  -4   0  238.01   13.71
   1  -4   0  239.47   16.26
   1  -4   0  256.06   13.74
   1  -4   0  270.84   16.27
  -1  -4   0  270.02   16.31
  -1  -4   0  262.55   16.31
  -1   4   0  256.97   16.27
   1   4   0  243.70   16.24
   1   4   0  242.80   12.22
  -1   4   0  239.49   12.19
  -2  -4   0  136.08    7.54
   2  -4   0  146.53    6.77
   2  -4   0  133.31    9.07
  -2  -4   0  137.61    9.09
   2  -4   0  145.29    7.59
  -2   4   0  134.53    9.05
   2   4   0  132.81    9.04
   2   4   0  133.44    6.80
  -2   4   0  138.73    6.77
  -3  -4   0    7.75    0.60
   3  -4   0   10.50    0.69
   3  -4   0    9.91    0.64
   3  -4   0    7.96    0.93
   3   4   0    9.91    0.70
   4  -4   0    5.98    0.55
   4  -4   0    4.59    0.83
   4  -4   0    6.65    0.60
   4   4   0    5.88    0.65
  -5  -4   0   20.48    1.35
   5  -4   0   19.98    1.28
   5  -4   0   21.26    1.97
  -6  -4   0    3.62    0.48
   6  -4   0    2.61    0.47
   6  -4   0    3.42    0.46
  -6  -4   0    2.72    0.48
   7  -4   0    7.72    0.63
   7  -4   0    8.86    0.83
  -7  -4   0    6.47    0.83
  -7  -4   0    8.91    0.82
   7  -4   0    8.45    0.85
   8  -4   0    5.78    0.57
   8  -4   0    7.61    0.73
   8  -4   0    5.25    0.77
   8  -4   0    6.38    0.67
  -8  -4   0    7.59    0.76
  -8  -4   0    7.89    0.80
  -8  -4   0   10.54    1.04
   8  -4   0    6.83    0.77
   9  -4   0    0.81    0.48
   9  -4   0    0.99    0.45
   9  -4   0    0.54    0.49
  -9  -4   0    0.84    0.45
   9  -4   0    0.86    0.32
  -9  -4   0    0.30    0.45
  -9  -4   0    1.86    0.63
   9  -4   0    1.10    0.56
  10  -4   0   14.71    0.78
  10  -4   0   16.37    1.31
  10  -4   0   13.79    1.18
 -10  -4   0   15.44    1.32
  10  -4   0   15.28    1.15
 -10  -4   0   15.40    1.12
 -10  -4   0   14.45    1.16
  10  -4   0   15.51    1.11
 -10  -4   0   13.15    0.94
  10  -4   0   15.86    0.79
  10   4   0   14.52    1.40
 -11  -4   0   22.69    1.48
  11  -4   0   24.57    1.55
 -11  -4   0   23.75    1.17
  11  -4   0   24.75    1.44
  11  -4   0   24.68    1.39
 -11  -4   0   24.92    1.47
 -11  -4   0   21.84    1.17
  11   4   0   23.52    1.70
  12  -4   0   18.18    0.99
  12  -4   0   16.33    1.02
 -12  -4   0   17.22    1.04
   0  -5   0    0.04    0.23
   0  -5   0    0.05    0.23
   0  -5   0    0.09    0.18
   0   5   0    0.18    0.21
   0   5   0    0.00    0.07
   1  -5   0    3.92    0.52
   1  -5   0    3.89    0.54
  -1  -5   0    3.53    0.53
  -1  -5   0    2.94    0.37
  -1  -5   0    2.78    0.51
   1  -5   0    3.37    0.39
   1   5   0    3.57    0.30
  -1   5   0    4.60    0.56
   1   5   0    3.66    0.49
  -2  -5   0  102.27    5.71
   2  -5   0  106.47    5.11
   2  -5   0  112.21    5.77
   2  -5   0  101.77    6.90
  -2  -5   0   98.25    6.90
  -2   5   0  100.19    6.88
   2   5   0  102.08    6.87
   2   5   0  101.17    5.14
   3  -5   0    0.85    0.24
   3  -5   0    0.50    0.41
  -3  -5   0    0.98    0.23
   3  -5   0    1.11    0.27
   3   5   0    1.25    0.31
   4  -5   0    9.44    0.73
   4  -5   0    7.97    1.11
   4   5   0    8.01    0.78
   5  -5   0   64.04    3.51
  -5  -5   0   63.91    3.58
   5  -5   0   56.79    4.61
  -6  -5   0    3.03    0.46
   6  -5   0    3.86    0.50
   6  -5   0    5.06    0.43
  -6  -5   0    3.40    0.56
   6  -5   0    3.69    0.47
  -7  -5   0   34.89    2.19
  -7  -5   0   32.03    1.98
   7  -5   0   32.11    1.79
   7  -5   0   32.82    2.05
   7  -5   0   32.06    1.71
   7  -5   0   33.42    2.04
   8  -5   0    9.23    0.82
   8  -5   0   11.47    1.02
   8  -5   0    8.96    0.68
  -8  -5   0   11.17    0.91
  -8  -5   0    7.25    0.94
   8  -5   0   10.94    0.97
   8  -5   0    9.42    0.80
   8  -5   0    9.67    1.00
  -8  -5   0   10.64    0.93
  -9  -5   0   17.08    1.05
  -9  -5   0   15.32    1.23
   9  -5   0   17.97    1.39
  -9  -5   0   16.11    1.41
   9  -5   0   18.49    1.25
   9  -5   0   16.70    1.20
   9  -5   0   17.60    0.92
   9  -5   0   16.94    0.92
   9  -5   0   18.98    1.34
  -9  -5   0   15.87    1.26
  10  -5   0   11.16    0.93
  10  -5   0    9.50    0.85
  10  -5   0   11.62    0.90
 -10  -5   0   10.83    0.68
 -10  -5   0    9.46    0.89
 -10  -5   0   11.28    1.04
  10  -5   0    8.97    0.93
 -10  -5   0    9.69    0.88
 -11  -5   0   10.47    0.82
  11  -5   0   10.20    0.79
  11  -5   0    9.47    0.79
 -11  -5   0    9.00    0.77
  11  -5   0   11.18    0.86
  12  -5   0    2.92    0.34
   0  -6   0   15.08    1.26
   0  -6   0   15.78    1.27
   0  -6   0   14.21    1.02
   1  -6   0   11.18    0.84
  -1  -6   0   11.16    1.04
   1  -6   0   12.57    1.03
  -1  -6   0   11.46    0.82
   1  -6   0   10.41    1.01
   1   6   0   10.84    0.65
  -2  -6   0    0.01    0.29
   2  -6   0    0.47    0.26
  -2  -6   0    0.46    0.23
   2  -6   0   -0.01    0.28
   2   6   0    0.40    0.21
   3  -6   0  114.59    6.37
   3  -6   0  104.41    7.67
   3   6   0  121.40    5.77
  -4  -6   0   60.43    3.38
   4  -6   0   63.94    3.51
   4  -6   0   55.94    3.33
   4  -6   0   55.52    4.37
   4   6   0   65.13    3.29
  -5  -6   0   40.76    2.13
  -5  -6   0   48.31    2.60
   5  -6   0   41.94    2.50
  -5  -6   0   44.25    2.41
   5  -6   0   43.81    2.12
  -6  -6   0   43.30    2.18
  -6  -6   0   42.07    2.64
   6  -6   0   43.72    2.51
   6  -6   0   44.09    2.14
   6  -6   0   43.37    2.55
  -6  -6   0   45.32    2.48
  -7  -6   0   62.90    3.43
   7  -6   0   68.08    2.97
   7  -6   0   60.57    2.97
  -7  -6   0   63.28    3.04
  -7  -6   0   67.54    3.69
   7  -6   0   58.36    3.60
  -7  -6   0   52.89    3.26
   7  -6   0   64.62    3.56
   7  -6   0   59.84    3.11
   7  -6   0   60.02    3.24
   7  -6   0   60.29    3.47
   8  -6   0    2.08    0.23
  -8  -6   0    1.18    0.45
   8  -6   0    1.79    0.47
  -8  -6   0    1.61    0.32
   8  -6   0    1.45    0.61
   8  -6   0    1.87    0.21
   8  -6   0    1.21    0.43
  -8  -6   0    2.13    0.50
   8  -6   0    2.45    0.51
   8  -6   0    2.06    0.56
  -8  -6   0    1.53    0.55
  -9  -6   0    0.00    0.43
   9  -6   0    1.17    0.46
   9  -6   0    0.52    0.43
  -9  -6   0    1.24    0.53
   9  -6   0    1.18    0.53
   9  -6   0    1.72    0.47
  -9  -6   0    0.89    0.29
  -9  -6   0    1.02    0.47
  10  -6   0    4.70    0.64
  10  -6   0    4.78    0.60
  10  -6   0    4.95    0.54
  10  -6   0    4.76    0.58
 -10  -6   0    3.82    0.57
 -10  -6   0    4.56    0.58
 -11  -6   0    5.09    0.54
  11  -6   0    4.61    0.49
  11  -6   0    4.78    0.51
   0  -7   0    0.21    0.25
   0  -7   0    0.31    0.30
   1  -7   0    3.38    0.57
  -1  -7   0    3.79    0.61
  -1  -7   0    2.97    0.43
   1  -7   0    2.61    0.42
   2  -7   0   37.66    2.63
  -2  -7   0   34.13    2.61
  -2  -7   0   31.98    2.07
   2  -7   0   35.08    2.13
   3  -7   0   52.20    4.03
   3  -7   0   59.14    3.31
   4  -7   0    3.71    0.38
   4  -7   0    3.91    0.55
  -4  -7   0    3.37    0.36
   5  -7   0    7.58    0.64
  -5  -7   0    8.05    0.49
   5  -7   0    7.39    0.67
   5  -7   0    7.60    0.37
  -5  -7   0    7.92    0.65
   6  -7   0  109.59    5.78
  -6  -7   0  107.00    5.11
  -6  -7   0  110.63    6.07
  -6  -7   0  110.47    5.74
   6  -7   0  104.66    5.97
  -7  -7   0   38.52    2.33
  -7  -7   0   39.62    2.27
  -7  -7   0   42.28    2.02
   7  -7   0   40.14    2.41
   7  -7   0   40.80    2.23
   7  -7   0   39.10    2.51
   7  -7   0   42.12    2.40
   7  -7   0   40.29    2.14
   8  -7   0    8.39    0.78
  -8  -7   0    7.86    0.53
  -8  -7   0    8.12    0.54
   8  -7   0    7.49    0.90
  -8  -7   0    5.07    0.67
   8  -7   0    7.18    0.68
  -8  -7   0    6.53    0.71
   8  -7   0    8.40    0.75
   8  -7   0    8.07    0.82
   9  -7   0    4.44    0.58
   9  -7   0    4.40    0.65
   9  -7   0    4.04    0.52
   9  -7   0    5.46    0.60
  -9  -7   0    4.16    0.63
  -9  -7   0    5.18    0.63
  10  -7   0   -0.04    0.37
  10  -7   0    0.95    0.38
 -10  -7   0    0.32    0.31
 -10  -7   0    0.22    0.37
  10  -7   0    0.72    0.39
  11  -7   0   15.37    0.91
  11  -7   0   15.69    0.95
 -11  -7   0   14.71    0.99
   0  -8   0   66.76    4.54
   0  -8   0   63.95    3.80
  -1  -8   0  126.62    8.38
   1  -8   0  130.63    8.39
  -1  -8   0  118.21    7.01
   1  -8   0  126.12    7.05
   2  -8   0   63.01    4.41
   2  -8   0   64.23    3.67
  -2  -8   0   61.26    3.62
  -2  -8   0   60.36    4.40
   3  -8   0   25.76    1.73
   4  -8   0   18.44    1.29
  -4  -8   0   16.80    1.00
   4  -8   0   15.46    1.01
  -5  -8   0    0.09    0.10
  -5  -8   0    0.02    0.09
   5  -8   0    0.03    0.21
  -5  -8   0    0.41    0.25
   5  -8   0    0.60    0.30
   6  -8   0    2.27    0.45
   6  -8   0    3.97    0.46
  -6  -8   0    3.89    0.27
   6  -8   0    2.96    0.40
   6  -8   0    2.73    0.40
  -6  -8   0    3.59    0.27
  -6  -8   0    3.81    0.48
   6  -8   0    2.96    0.59
  -6  -8   0    2.61    0.43
   7  -8   0    4.77    0.76
  -7  -8   0    5.31    0.57
   7  -8   0    5.45    0.55
   7  -8   0    5.22    0.63
   7  -8   0    4.89    0.56
  -7  -8   0    4.40    0.59
   7  -8   0    4.75    0.52
  -8  -8   0    1.11    0.41
  -8  -8   0    0.80    0.44
   8  -8   0    1.14    0.45
   8  -8   0    1.20    0.60
   8  -8   0    1.06    0.40
   8  -8   0    0.84    0.42
   9  -8   0    1.23    0.43
  -9  -8   0    0.74    0.43
   9  -8   0    1.80    0.42
   9  -8   0    0.89    0.40
  -9  -8   0    0.73    0.36
 -10  -8   0    0.37    0.38
  10  -8   0   -0.06    0.33
  10  -8   0    0.18    0.32
 -11  -8   0    0.20    0.27
  11  -8   0   -0.07    0.22
  11  -8   0   -0.01    0.22
   0  -9   0    0.22    0.32
   1  -9   0    2.39    0.49
  -1  -9   0    2.44    0.47
  -2  -9   0    8.87    0.83
   2  -9   0    8.31    0.55
   2  -9   0    8.28    0.86
  -3  -9   0    8.56    0.54
   3  -9   0    7.95    0.88
   4  -9   0   19.87    1.49
  -4  -9   0   20.00    1.15
  -5  -9   0    0.32    0.23
   5  -9   0    0.75    0.30
   6  -9   0   81.06    4.13
   6  -9   0   86.07    4.53
  -6  -9   0   84.18    4.37
   6  -9   0   84.64    4.31
   6  -9   0   82.50    4.82
  -6  -9   0   89.03    4.47
   7  -9   0    3.34    0.48
  -7  -9   0    4.05    0.57
   7  -9   0    3.68    0.46
   7  -9   0    4.02    0.71
   7  -9   0    4.22    0.53
  -7  -9   0    4.23    0.47
   8  -9   0    0.56    0.34
   8  -9   0    0.38    0.38
  -8  -9   0    0.24    0.31
  -8  -9   0    0.33    0.41
   8  -9   0    0.12    0.56
   9  -9   0    3.24    0.47
   9  -9   0    2.58    0.42
  -9  -9   0    4.22    0.57
  10  -9   0   -0.33    0.27
 -10  -9   0    0.16    0.33
  10  -9   0   -0.26    0.26
 -11  -9   0    0.08    0.20
   0 -10   0   16.13    0.85
   0 -10   0   12.47    1.15
   1 -10   0   13.24    1.11
   1 -10   0   12.99    0.76
  -1 -10   0   12.67    0.76
   1 -10   0   12.99    1.18
  -1 -10   0   13.02    1.09
   2 -10   0    7.98    0.91
   2 -10   0    6.62    0.53
  -2 -10   0    8.88    0.88
   2 -10   0    7.20    0.82
   3 -10   0   12.14    1.11
   3 -10   0   14.01    1.26
   4 -10   0  281.58   15.64
  -5 -10   0    5.61    0.56
   5 -10   0    5.37    0.49
   5 -10   0    6.07    0.51
   5 -10   0    4.80    0.68
  -5 -10   0    4.93    0.42
   5 -10   0    5.82    0.74
   6 -10   0    5.40    0.50
   6 -10   0    4.16    0.71
  -6 -10   0    5.52    0.59
  -6 -10   0    4.93    0.46
   6 -10   0    5.93    0.54
   7 -10   0    3.28    0.69
  -7 -10   0    2.75    0.49
   7 -10   0    2.74    0.45
   7 -10   0    3.28    0.42
   8 -10   0    3.98    0.74
   8 -10   0    3.62    0.44
  -8 -10   0    3.32    0.54
   8 -10   0    3.58    0.48
  -9 -10   0    1.92    0.43
   9 -10   0    1.45    0.35
   9 -10   0    1.60    0.32
  10 -10   0    0.55    0.23
 -10 -10   0    1.08    0.30
   0 -11   0    0.05    0.39
   0 -11   0    0.00    0.22
   1 -11   0    0.56    0.43
  -1 -11   0    0.87    0.27
  -1 -11   0    1.24    0.48
   1 -11   0    0.91    0.27
   2 -11   0   28.13    1.58
   2 -11   0   27.98    1.95
   4 -11   0    8.59    0.86
   4 -11   0    8.46    0.90
  -4 -11   0    8.46    0.66
   5 -11   0   66.31    4.43
   5 -11   0   70.46    3.70
   5 -11   0   77.04    4.20
  -5 -11   0   78.17    3.77
   6 -11   0    2.98    0.69
   6 -11   0    2.68    0.39
  -6 -11   0    2.67    0.45
  -7 -11   0    0.36    0.36
   7 -11   0   -0.34    0.55
   7 -11   0    0.16    0.31
   8 -11   0    7.88    0.89
   8 -11   0    8.50    0.66
  -8 -11   0    7.97    0.70
   9 -11   0    3.18    0.36
  -9 -11   0    4.12    0.45
 -10 -11   0   11.94    0.72
   1 -12   0   12.81    0.81
   2 -12   0    1.77    0.51
  -2 -12   0    1.59    0.41
   3 -12   0   22.21    1.43
   3 -12   0   19.60    1.56
   4 -12   0   28.62    1.83
   4 -12   0   26.87    1.95
  -4 -12   0   28.10    1.54
   5 -12   0    1.21    0.55
   5 -12   0    0.52    0.50
  -5 -12   0    1.15    0.31
   6 -12   0    0.99    0.61
  -6 -12   0    1.52    0.37
  -7 -12   0   13.31    0.92
   7 -12   0   13.86    1.21
  -8 -12   0   -0.07    0.28
   8 -12   0    1.03    0.55
  -9 -12   0    1.79    0.27
   0 -13   0    0.33    0.36
   0 -13   0   -0.02    0.46
   1 -13   0   33.60    2.24
  -1 -13   0   30.52    1.87
  -1 -13   0   33.51    2.21
  -2 -13   0   10.18    0.88
   2 -13   0   10.50    1.07
   3 -13   0    8.99    0.98
  -3 -13   0    9.14    0.84
   4 -13   0    5.16    0.70
   4 -13   0    3.78    0.70
   5 -13   0    0.50    0.50
   5 -13   0    0.29    0.54
   6 -13   0   23.35    1.71
   6 -13   0   26.17    1.74
  -6 -13   0   23.85    1.36
   7 -13   0    1.00    0.55
  -7 -13   0    0.47    0.26
  -8 -13   0   -0.19    0.20
   0 -14   0   27.40    1.64
  -1 -14   0   -0.03    0.37
   1 -14   0   -0.19    0.47
  -1 -14   0    0.35    0.48
   2 -14   0    6.97    0.89
  -2 -14   0    6.18    0.69
  -3 -14   0    0.24    0.41
   3 -14   0   -0.36    0.49
  -4 -14   0    1.19    0.46
   4 -14   0    0.91    0.55
   4 -14   0   -0.14    0.50
  -5 -14   0    3.13    0.55
   5 -14   0    2.20    0.60
   5 -14   0    2.20    0.61
   6 -14   0    7.22    0.82
   6 -14   0   10.16    0.91
   7 -14   0    1.74    0.52
  -8 -14   0    2.30    0.39
   0 -15   0   -0.16    0.50
   1 -15   0    1.95    0.63
  -1 -15   0    2.94    0.64
  -1 -15   0    2.52    0.48
  -2 -15   0   -0.15    0.38
   2 -15   0    0.81    0.59
  -3 -15   0   17.60    1.24
   3 -15   0   18.92    1.51
   4 -15   0    4.93    0.74
  -4 -15   0    4.87    0.62
   5 -15   0   20.25    1.61
   5 -15   0   25.21    1.54
  -5 -15   0   21.53    1.39
  -6 -15   0    6.18    0.64
   6 -15   0    6.01    0.69
   6 -15   0    7.59    0.73
  -7 -15   0    3.91    0.47
   0 -16   0    8.42    0.93
  -1 -16   0    0.26    0.37
  -1 -16   0    0.40    0.47
   1 -16   0    0.33    0.57
  -2 -16   0    0.98    0.40
   2 -16   0    1.26    0.61
   3 -16   0   14.30    1.28
  -3 -16   0   14.91    1.04
   4 -16   0    8.20    0.87
  -4 -16   0    8.27    0.73
   5 -16   0    0.35    0.43
  -5 -16   0    0.34    0.36
   6 -16   0    3.30    0.48
  -6 -16   0    2.84    0.42
   0 -17   0   -0.27    0.45
   1 -17   0   11.06    1.07
   2 -17   0   13.68    1.20
   3 -17   0   -0.17    0.47
  -3 -17   0    0.01    0.32
   4 -17   0   15.15    1.12
  -4 -17   0   12.84    0.90
   5 -17   0   10.05    0.82
  -5 -17   0    9.22    0.69
   0 -18   0   17.22    1.27
   1 -18   0    1.37    0.46
   2 -18   0    7.15    0.74
   3 -18   0    5.65    0.64
   4 -18   0    1.25    0.37
   0 -19   0    0.18    0.29
   1 -19   0    2.96    0.44
   2 -19   0    1.79    0.38
   3 -19   0    1.90    0.35
  12   0  -1   -0.09    0.33
  12   0  -1    0.12    0.36
 -11   0   1    0.36    0.45
  11   0  -1    0.39    0.55
 -11   0   1    0.79    0.52
  11   0  -1    0.14    0.43
  11   0  -1    0.40    0.48
  11   0  -1    0.02    0.45
 -10   0   1    0.01    0.54
  10   0  -1    0.50    0.51
  10   0  -1    0.20    0.61
 -10   0   1   -0.49    0.44
  10   0  -1   -0.01    0.51
  10   0  -1   -0.21    0.43
   9   0  -1    0.28    0.51
   9   0  -1   -0.35    0.40
   9   0  -1   -0.19    0.47
  -9   0   1   -0.40    0.47
   9   0  -1    0.05    0.56
  -8   0   1    0.75    0.47
   8   0  -1    1.00    0.44
   8   0  -1    0.27    0.48
   8   0  -1    0.35    0.45
   7   0  -1    0.40    0.41
  -7   0   1   -0.08    0.33
   7   0  -1   -0.11    0.32
   6   0  -1   -0.15    0.26
  -6   0   1   -0.06    0.27
   4   0  -1    0.05    0.20
   4   0  -1    0.11    0.37
  -3   0   1    0.25    0.28
   3   0  -1   -0.03    0.17
   3   0  -1    0.20    0.07
   3   0  -1   -0.02    0.28
   2   0  -1   -0.01    0.19
  -2   0   1    0.51    0.23
  -1   0   1    0.87    0.18
   1   0  -1    0.83    0.17
   0   0  -1    0.75    0.13
   0   0   1    0.59    0.12
   0   0   1    1.26    0.18
   0   0  -1    1.52    0.18
  -1   0  -1    0.15    0.13
   1   0   1    0.29    0.16
   1   0   1    0.23    0.14
  -1   0  -1    0.25    0.10
   2   0   1    0.75    0.28
  -2   0  -1    0.34    0.16
   2   0   1    0.52    0.17
  -2   0  -1    0.46    0.23
   3   0   1    0.19    0.30
   3   0   1    0.11    0.17
   4   0   1   -0.05    0.39
   4   0   1    0.05    0.21
   5   0   1    0.31    0.50
   6   0   1   -0.03    0.26
  -6   0  -1    0.23    0.30
   7   0   1    0.42    0.39
   7   0   1    0.21    0.35
  -7   0  -1   -0.22    0.34
   8   0   1    0.07    0.44
   8   0   1    0.50    0.52
  -8   0  -1   -0.13    0.43
   8   0   1    0.50    0.39
   8   0   1   -0.08    0.39
   9   0   1   -0.31    0.47
  -9   0  -1   -0.10    0.52
   9   0   1    0.39    0.58
   9   0   1    0.15    0.40
   9   0   1    0.53    0.48
  10   0   1    0.61    0.52
 -10   0  -1   -0.17    0.54
  10   0   1    0.39    0.48
  10   0   1   -0.16    0.43
  10   0   1   -0.28    0.53
  11   0   1   -0.10    0.43
  11   0   1   -0.53    0.24
  11   0   1    0.26    0.41
  11   0   1   -0.74    0.41
  12   0   1    0.00    0.31
  12   0   1    0.01    0.31
 -12  -1   1   27.51    1.56
  12  -1  -1   27.22    1.52
  12  -1  -1   28.67    1.58
  12   1  -1   25.09    1.51
  11  -1  -1    1.02    0.49
  11  -1  -1    0.20    0.43
 -11  -1   1    0.96    0.49
 -11  -1   1    0.81    0.41
  11  -1  -1    0.75    0.54
 -11  -1   1    0.73    0.45
  11  -1  -1    0.85    0.46
  11   1  -1   -0.04    0.53
  11   1  -1    0.82    0.50
  11   1  -1    1.37    0.55
 -11   1   1    0.59    0.51
  10  -1  -1    3.80    0.69
  10  -1  -1    4.70    0.80
 -10  -1   1    5.70    0.66
  10  -1  -1    4.10    0.67
  10  -1  -1    6.25    0.93
 -10  -1   1    3.66    0.76
 -10  -1   1    3.18    0.63
 -10   1   1    6.11    0.91
  10   1  -1    4.97    0.90
  10   1  -1    4.48    0.69
  10   1  -1    7.42    0.96
  -9  -1   1   82.44    4.72
  -9  -1   1   79.08    4.14
   9  -1  -1   78.93    4.05
   9  -1  -1   77.70    4.53
   9  -1  -1   82.94    4.22
   9  -1  -1   79.64    4.64
  -9  -1   1   72.72    4.37
   9   1  -1   76.00    4.05
   9   1  -1   77.54    4.67
   9   1  -1   82.87    4.58
  -9   1   1   76.02    4.70
   8  -1  -1    1.81    0.47
   8  -1  -1    0.49    0.47
  -8  -1   1    0.82    0.45
   8  -1  -1    0.58    0.52
  -8  -1   1    0.99    0.49
   8   1  -1    0.12    0.45
   8   1  -1    0.16    0.40
  -8   1   1    1.00    0.52
   8   1  -1    0.77    0.47
  -7  -1   1   -0.09    0.32
   7  -1  -1    0.24    0.39
   7  -1  -1   -0.01    0.34
  -7  -1   1    0.30    0.34
  -7   1   1    0.15    0.36
   7   1  -1    0.04    0.33
   7   1  -1   -0.18    0.37
   6  -1  -1    1.03    0.33
  -6  -1   1    0.57    0.31
   6   1  -1    1.36    0.38
  -6   1   1    0.60    0.34
   4  -1  -1   45.06    2.42
   4  -1  -1   46.14    3.37
   4   1  -1   44.34    3.32
   4   1  -1   43.63    2.43
  -3  -1   1   65.80    4.73
   3  -1  -1   67.68    4.75
   3  -1  -1   70.03    3.79
   3  -1  -1   71.71    3.52
   3   1  -1   71.29    4.75
   3   1  -1   66.63    3.53
  -2  -1   1   46.70    3.05
   2  -1  -1   44.24    3.06
   2  -1  -1   43.98    2.25
   2   1  -1   41.02    3.02
  -2   1   1   44.84    3.05
   1  -1  -1  100.62    6.63
  -1  -1   1  104.09    6.60
   1  -1  -1  105.58    6.65
  -1   1   1   97.54    6.64
   1   1  -1   98.09    6.58
  -1   1   1  104.39    6.63
   0  -1  -1   10.78    0.83
   0  -1   1   11.80    0.72
   0  -1  -1    9.93    0.81
   0  -1  -1    9.88    0.57
   0  -1   1   11.94    0.72
   0   1   1   10.86    0.82
   0   1   1    8.95    0.81
   1  -1   1  327.80   20.73
  -1  -1  -1  318.15   20.79
  -1  -1  -1  362.89   20.80
  -1  -1  -1  326.72   15.66
   1  -1   1  339.37   15.67
   1  -1   1  304.38   17.52
   1   1   1  316.63   15.66
  -1   1  -1  320.37   20.72
   1   1   1  321.59   20.78
  -1   1  -1  296.41   15.66
   1   1   1  320.63   20.78
   2  -1   1   38.62    2.65
  -2  -1  -1   38.28    1.97
   2  -1   1   38.00    1.97
  -2  -1  -1   40.00    2.68
   2   1   1   37.74    1.97
   2   1   1   34.95    2.65
   2   1   1   37.52    2.67
  -2   1  -1   35.36    1.96
   3  -1   1   49.24    3.48
   3  -1   1   48.70    2.57
   3   1   1   48.55    2.57
   3   1   1   48.34    3.50
   4  -1   1    3.47    0.46
   4  -1   1    3.49    0.71
   4   1   1    2.98    0.45
   4   1   1    2.97    0.70
   5  -1   1  149.18   10.22
  -6  -1  -1   44.12    2.69
   6  -1   1   44.12    2.60
   6   1   1   43.48    2.63
   7  -1   1   15.48    1.24
   7  -1   1   14.29    1.18
  -7  -1  -1   15.91    1.25
   7   1   1   14.97    1.26
   7   1   1   14.89    1.23
   8  -1   1    3.38    0.69
   8  -1   1    4.72    0.62
   8  -1   1    3.66    0.56
   8  -1   1    4.01    0.65
  -8  -1  -1    3.41    0.71
  -8  -1  -1    3.07    0.34
   8   1   1    3.33    0.63
   8   1   1    2.68    0.54
   8   1   1    2.50    0.51
   8   1   1    3.27    0.66
   9  -1   1   31.01    2.12
   9  -1   1   30.55    1.82
   9  -1   1   30.46    1.89
  -9  -1  -1   29.11    2.20
   9  -1   1   30.65    2.08
   9   1   1   30.43    1.86
   9   1   1   30.72    2.13
   9   1   1   33.16    2.19
   9   1   1   30.20    1.90
  10  -1   1    1.79    0.51
  10  -1   1    1.83    0.58
 -10  -1  -1    2.56    0.68
  10  -1   1    1.95    0.64
  10  -1   1    1.51    0.40
  10  -1   1    2.33    0.56
 -10   1  -1    2.64    0.70
  10   1   1    1.42    0.57
  10   1   1    2.55    0.56
  10   1   1    1.55    0.65
  10   1   1    2.76    0.61
  11  -1   1    0.79    0.23
  11  -1   1    0.69    0.42
  11  -1   1    0.71    0.22
  11  -1   1    0.57    0.48
  11  -1   1    0.01    0.43
 -11  -1  -1    0.87    0.45
  11   1   1    0.78    0.45
  11   1   1    0.86    0.47
  11   1   1    0.20    0.29
  11   1   1    0.98    0.54
  12  -1   1    0.39    0.31
  12  -1   1    0.36    0.30
  12   1   1    0.64    0.35
  12   1   1    0.46    0.31
 -12  -2   1    0.51    0.31
  12  -2  -1   -0.13    0.31
  12  -2  -1   -0.20    0.30
  11  -2  -1   22.41    1.56
  11  -2  -1   22.73    1.40
  11  -2  -1   21.61    1.60
  11  -2  -1   21.44    1.22
  11  -2  -1   23.82    1.45
 -11  -2   1   21.59    1.62
 -11  -2   1   22.51    1.41
 -11  -2   1   21.95    1.47
 -11  -2   1   20.09    1.23
  11   2  -1   24.12    1.43
  11   2  -1   21.11    1.65
 -10  -2   1    6.95    0.73
  10  -2  -1    3.64    0.77
 -10  -2   1    4.88    0.83
  10  -2  -1    4.38    0.75
  10  -2  -1    5.52    0.71
 -10  -2   1    5.44    0.73
  10  -2  -1    5.53    0.70
  10   2  -1    4.86    0.71
  10   2  -1    6.05    0.90
 -10   2   1    5.07    0.84
  10   2  -1    6.41    0.96
   9  -2  -1    2.66    0.73
   9  -2  -1    2.74    0.67
  -9  -2   1    3.50    0.63
  -9  -2   1    3.10    0.55
   9  -2  -1    2.16    0.52
   9  -2  -1    2.37    0.56
  -9  -2   1    2.79    0.70
   9   2  -1    3.01    0.70
   9   2  -1    3.34    0.77
  -9   2   1    2.80    0.68
  -8  -2   1   36.48    2.39
   8  -2  -1   35.67    2.12
   8  -2  -1   36.10    2.04
   8  -2  -1   36.88    2.33
  -8  -2   1   34.48    2.05
   8  -2  -1   36.05    2.33
  -8  -2   1   35.92    2.18
   8   2  -1   38.29    2.40
   8   2  -1   35.79    2.40
  -8   2   1   33.54    2.39
  -7  -2   1   14.72    1.22
   7  -2  -1   14.26    1.19
   7  -2  -1   15.30    1.16
  -7  -2   1   14.11    1.08
  -7   2   1   14.96    1.23
   7   2  -1   15.66    1.24
  -6  -2   1   30.80    1.91
   6  -2  -1   29.76    1.86
  -6   2   1   28.67    1.91
   5  -2  -1    0.68    0.57
   4  -2  -1   81.04    3.99
   4  -2  -1   76.27    5.43
   4   2  -1   73.98    4.01
   3  -2  -1  510.44   26.24
  -3  -2   1  498.18   31.22
   3  -2  -1  508.94   23.50
   3  -2  -1  462.92   31.23
  -3   2   1  426.82   31.20
   3   2  -1  488.96   31.21
   3   2  -1  488.55   23.54
   2  -2  -1   13.43    0.76
   2  -2  -1   12.56    0.80
   2  -2  -1   14.02    1.13
   2   2  -1   13.84    1.07
  -2   2   1   12.61    1.11
  -1  -2   1  221.07   13.29
   1  -2  -1  205.56   13.36
   1  -2  -1  213.98   13.38
  -1  -2   1  197.34   11.23
   1   2  -1  204.15   13.28
  -1   2   1  217.76   13.36
   1   2  -1  206.41   13.27
  -1   2   1  186.49   13.36
   0  -2   1  623.65   34.91
   0  -2  -1  684.13   31.12
   0  -2  -1  706.57   41.34
   0   2   1  530.95   41.26
   0   2   1  678.65   41.32
  -1  -2  -1    4.45    0.51
  -1  -2  -1    6.00    0.56
   1  -2   1    4.65    0.37
   1  -2   1    4.71    0.35
  -1  -2  -1    4.61    0.32
   1  -2   1    4.88    0.44
  -1   2  -1    4.64    0.41
   1   2   1    4.90    0.53
  -1   2  -1    4.27    0.33
   1   2   1    4.20    0.32
   1   2   1    3.06    0.47
   2  -2   1   31.52    1.56
   2  -2   1   28.52    2.09
  -2  -2  -1   27.65    1.55
  -2  -2  -1   27.94    2.14
   2  -2   1   32.63    1.69
   2   2   1   27.03    1.55
  -2   2  -1   26.25    1.55
   2   2   1   29.32    2.13
   3  -2   1    2.07    0.29
   3  -2   1    1.67    0.29
  -3  -2  -1    1.76    0.18
  -3  -2  -1    3.08    0.58
   3  -2   1    2.41    0.52
   3   2   1    1.75    0.31
   3   2   1    2.06    0.51
   4  -2   1    8.39    0.69
   4  -2   1    8.33    1.10
   4   2   1    7.08    0.71
   4   2   1   10.87    1.27
   5  -2   1   43.02    2.57
   5  -2   1   47.25    3.53
   6  -2   1    0.59    0.30
  -6  -2  -1    1.05    0.37
   6   2   1    1.16    0.38
   7  -2   1   65.34    3.80
  -7  -2  -1   64.05    3.91
   7  -2   1   65.74    3.70
   7   2   1   66.61    3.80
   7   2   1   66.62    3.89
   8  -2   1   28.18    1.89
  -8  -2  -1   25.86    1.66
  -8  -2  -1   31.14    2.06
   8  -2   1   27.88    1.69
   8  -2   1   29.06    1.90
   8  -2   1   28.36    1.66
   8   2   1   29.56    1.98
   8   2   1   26.41    1.67
   8   2   1   25.55    1.94
   9  -2   1    0.35    0.34
  -9  -2  -1    1.56    0.46
   9  -2   1    1.16    0.54
   9  -2   1    1.72    0.51
   9  -2   1    0.72    0.60
  -9  -2  -1    0.37    0.48
  -9  -2  -1    1.05    0.60
   9  -2   1    0.54    0.42
   9   2   1    0.46    0.52
   9   2   1    0.97    0.57
   9   2   1    0.61    0.64
  10  -2   1   16.90    0.98
  10  -2   1   15.63    1.27
 -10  -2  -1   16.02    1.44
  10  -2   1   16.61    1.39
 -10  -2  -1   14.96    1.27
 -10  -2  -1   14.95    1.14
  10  -2   1   17.96    1.19
  10  -2   1   16.59    1.19
  10   2   1   17.25    1.42
  10   2   1   15.49    1.20
  10   2   1   15.12    1.43
 -11  -2  -1    0.81    0.44
  11  -2   1    0.15    0.40
  11  -2   1    0.52    0.39
  11  -2   1    0.88    0.48
  11   2   1    0.80    0.53
  11   2   1    1.16    0.46
  11   2   1    0.85    0.47
  12  -2   1    0.28    0.28
  12  -2   1    0.47    0.29
  12  -3  -1    4.81    0.51
 -12  -3   1    5.13    0.51
  12  -3  -1    5.59    0.51
  11  -3  -1   25.50    1.52
  11  -3  -1   22.59    1.66
 -11  -3   1   26.91    1.53
 -11  -3   1   21.71    1.53
  11  -3  -1   24.41    1.21
  11  -3  -1   22.98    1.21
 -11  -3   1   24.52    1.27
  11  -3  -1   26.45    1.48
  11   3  -1   23.97    1.76
  10  -3  -1   14.41    1.11
  10  -3  -1   12.90    0.90
  10  -3  -1   14.06    1.11
 -10  -3   1   12.28    0.88
 -10  -3   1    9.64    1.14
 -10  -3   1   14.60    1.07
  10  -3  -1   13.25    1.19
 -10  -3   1   12.59    1.08
  10  -3  -1   12.58    1.22
  10   3  -1   14.25    1.34
  -9  -3   1    8.18    0.89
   9  -3  -1    7.73    0.83
   9  -3  -1    7.10    0.97
   9  -3  -1    9.28    1.00
  -9  -3   1    9.28    0.84
   9  -3  -1    9.24    0.87
  -9  -3   1    7.41    0.97
  -8  -3   1   30.12    1.77
   8  -3  -1   29.00    1.74
   8  -3  -1   29.56    2.01
   8  -3  -1   29.91    1.82
  -8  -3   1   29.78    1.87
  -8  -3   1   31.96    2.09
   8  -3  -1   28.37    1.99
   7  -3  -1   17.88    1.38
  -7  -3   1   20.04    1.43
   7  -3  -1   19.36    1.42
  -7  -3   1   20.05    1.30
  -6  -3   1    8.49    0.70
  -6  -3   1    5.96    0.69
   6  -3  -1    7.51    0.71
  -5  -3   1  104.92    6.04
   5  -3  -1  104.87    6.01
   5  -3  -1  122.27    7.71
   4  -3  -1    1.30    0.51
   4  -3  -1    1.37    0.25
   4  -3  -1    1.23    0.28
   4   3  -1    2.02    0.39
   3  -3  -1   72.99    3.87
   3  -3  -1   69.09    3.51
  -3  -3   1   71.18    4.78
   3  -3  -1   67.56    4.80
  -3   3   1   65.56    4.80
   3   3  -1   68.67    4.75
   3   3  -1   68.50    3.57
   2  -3  -1   46.30    3.21
  -2  -3   1   49.12    3.15
   2  -3  -1   45.98    2.30
  -2  -3   1   42.27    2.55
   2  -3  -1   47.95    2.58
  -2   3   1   42.17    3.19
   2   3  -1   44.76    3.11
   1  -3  -1  515.13   37.96
   1  -3  -1  592.75   32.08
  -1  -3   1  624.33   37.88
  -1  -3   1  584.10   32.07
   1  -3  -1  610.91   28.56
  -1   3   1  583.36   37.99
   1   3  -1  629.89   37.86
   0  -3   1  133.46    8.45
   0  -3  -1  133.19    8.64
   0  -3  -1  124.38    7.18
   0  -3   1  137.02    8.46
   0  -3   1  125.78    7.20
   0   3   1  135.06    8.60
   0   3   1  130.88    8.61
  -1  -3  -1    3.32    0.52
   1  -3   1    3.20    0.31
   1  -3   1    2.46    0.30
  -1  -3  -1    2.21    0.44
   1  -3   1    3.31    0.37
  -1  -3  -1    2.75    0.24
   1   3   1    2.48    0.24
  -1   3  -1    3.04    0.34
   1   3   1    3.32    0.47
  -1   3  -1    2.44    0.27
   2  -3   1   64.35    3.38
   2  -3   1   60.65    3.06
  -2  -3  -1   58.33    3.31
  -2  -3  -1   62.81    4.18
  -2  -3  -1   62.33    4.18
   2  -3   1   59.37    4.06
  -2   3  -1   58.04    3.05
  -2   3  -1   60.95    4.05
   2   3   1   59.79    3.05
   2   3   1   52.66    4.10
  -3  -3  -1    2.78    0.25
   3  -3   1    2.25    0.51
   3  -3   1    2.81    0.35
   3  -3   1    2.95    0.37
   3   3   1    2.40    0.36
   3   3   1    3.13    0.61
   4  -3   1   -0.13    0.21
   4  -3   1    0.17    0.39
   4   3   1    0.46    0.29
  -5  -3  -1   98.17    5.71
   5  -3   1  108.23    5.65
   5  -3   1   99.09    7.17
  -6  -3  -1   29.12    2.04
   6  -3   1   33.34    1.94
   6  -3   1   32.30    1.97
  -6  -3  -1   32.97    1.91
   6   3   1   33.06    2.07
  -7  -3  -1   52.03    2.96
  -7  -3  -1   51.13    3.19
   7  -3   1   49.34    2.98
   7  -3   1   54.82    3.07
   7   3   1   51.29    3.09
   7   3   1   51.03    3.18
  -8  -3  -1   68.34    3.80
   8  -3   1   64.94    3.56
   8  -3   1   66.17    3.43
   8  -3   1   72.15    3.86
  -8  -3  -1   64.51    3.58
   8  -3   1   70.88    3.94
  -8  -3  -1   63.32    4.05
   8   3   1   72.91    3.97
   8   3   1   67.11    4.05
   8   3   1   63.16    3.48
   9  -3   1    9.00    0.81
   9  -3   1    8.89    0.90
  -9  -3  -1    7.37    0.78
   9  -3   1    9.90    0.86
   9  -3   1    8.67    0.66
  -9  -3  -1    6.49    0.82
  -9  -3  -1    7.43    1.00
   9  -3   1    7.43    0.93
   9   3   1    8.82    0.86
   9   3   1    7.81    0.99
   9   3   1    8.43    1.07
 -10  -3  -1    1.97    0.58
 -10  -3  -1    2.52    0.69
  10  -3   1    1.81    0.48
  10  -3   1    1.64    0.49
 -10  -3  -1    3.09    0.54
  10  -3   1    3.22    0.56
  10  -3   1    3.24    0.30
  10  -3   1    2.37    0.29
  10  -3   1    2.34    0.61
  10   3   1    2.29    0.58
  10   3   1    3.46    0.74
  10   3   1    0.88    0.65
 -11  -3  -1    4.82    0.58
  11  -3   1    4.32    0.61
 -11  -3  -1    2.83    0.53
 -11  -3  -1    3.48    0.42
  11  -3   1    4.61    0.56
  11  -3   1    4.32    0.55
  11   3   1    4.81    0.61
  11   3   1    2.37    0.63
  12  -3   1   11.62    0.73
  12  -3   1   10.90    0.75
  12  -4  -1    0.19    0.28
 -12  -4   1    0.19    0.28
  12  -4  -1    0.61    0.29
  11  -4  -1    0.86    0.43
  11  -4  -1    1.07    0.44
 -11  -4   1    0.44    0.36
 -11  -4   1    0.30    0.39
  11  -4  -1    0.62    0.45
  10  -4  -1    2.77    0.59
 -10  -4   1    4.07    0.58
  10  -4  -1    3.41    0.60
  10  -4  -1    2.69    0.39
  10  -4  -1    2.50    0.67
  10  -4  -1    2.95    0.59
 -10  -4   1    3.33    0.57
 -10  -4   1    2.15    0.37
 -10  -4   1    2.68    0.62
   9  -4  -1   15.83    1.39
  -9  -4   1   16.53    1.24
   9  -4  -1   15.76    1.02
   9  -4  -1   16.71    1.18
  -9  -4   1   16.92    1.41
   9  -4  -1   14.22    1.17
   9  -4  -1   16.07    1.33
  -9  -4   1   13.89    1.14
  -9  -4   1   15.13    0.99
  -8  -4   1    0.99    0.40
   8  -4  -1    1.10    0.50
   8  -4  -1    0.74    0.43
   8  -4  -1    0.71    0.55
  -8  -4   1    0.82    0.52
  -8  -4   1    1.08    0.42
   8  -4  -1    1.62    0.44
  -7  -4   1   24.68    1.66
  -7  -4   1   23.67    1.49
   7  -4  -1   21.91    1.60
   7  -4  -1   23.39    1.60
  -6  -4   1   11.26    0.93
   6  -4  -1   11.01    0.90
  -6  -4   1   11.01    0.84
   6  -4  -1   10.33    0.90
  -5  -4   1    7.50    0.67
   5  -4  -1    7.49    0.64
   5  -4  -1    6.93    1.18
   4  -4  -1  154.88    7.69
   4  -4  -1  155.36    8.52
   4  -4  -1  148.01   10.39
   4   4  -1  159.20    7.79
   3  -4  -1   11.76    0.73
   3  -4  -1   11.16    0.80
   3  -4  -1   10.91    1.14
   3   4  -1   11.26    0.80
  -2  -4   1  273.05   15.62
  -2  -4   1  291.76   18.57
   2  -4  -1  282.72   18.64
   2  -4  -1  299.56   15.66
   2  -4  -1  296.78   13.94
  -2   4   1  284.46   18.65
   2   4  -1  281.16   18.53
   1  -4  -1   65.63    3.66
  -1  -4   1   70.77    4.34
  -1  -4   1   62.08    3.65
   1  -4  -1   62.49    4.44
  -1  -4   1   69.64    4.33
  -1   4   1   61.65    4.44
   1   4  -1   63.72    4.27
   0  -4   1   93.19    5.60
   0  -4   1   81.68    4.76
   0  -4  -1   89.01    5.76
   0  -4  -1   80.93    4.74
   0  -4  -1   76.64    5.73
   0  -4   1   90.63    5.59
   0   4   1   86.55    5.73
   1  -4   1  107.70    5.80
  -1  -4  -1   99.79    5.76
   1  -4   1  105.08    6.83
  -1  -4  -1  112.65    7.03
  -1   4  -1  102.81    6.79
   1   4   1  103.76    5.13
  -1   4  -1  101.09    5.16
   1   4   1  105.52    6.94
  -2  -4  -1   17.15    1.46
  -2  -4  -1   15.62    1.00
   2  -4   1   14.86    1.29
  -2  -4  -1   16.65    1.43
   2  -4   1   17.14    0.98
   2  -4   1   16.88    1.07
  -2   4  -1   16.97    1.30
   2   4   1   15.35    1.36
  -2   4  -1   15.08    0.96
   2   4   1   18.14    0.98
   3  -4   1   51.49    3.96
   3  -4   1   60.20    3.26
  -3  -4  -1   56.74    3.16
   3  -4   1   57.41    2.97
   3   4   1   56.84    2.99
   4  -4   1   24.13    1.45
   4  -4   1   19.84    1.88
   4  -4   1   23.51    1.39
   4   4   1   21.39    1.41
  -5  -4  -1    2.30    0.41
   5  -4   1    3.70    0.41
   5  -4   1    3.20    0.82
   6  -4   1   24.73    1.33
  -6  -4  -1   24.78    1.71
  -6  -4  -1   26.60    1.57
   6  -4   1   23.83    1.59
   6  -4   1   26.33    1.58
   7  -4   1    6.64    0.68
  -7  -4  -1    5.20    0.66
   7  -4   1    4.47    0.45
  -7  -4  -1    4.94    0.74
   7  -4   1    5.21    0.65
  -8  -4  -1   11.52    1.19
   8  -4   1   10.16    0.98
  -8  -4  -1   10.66    0.90
   8  -4   1   11.70    0.74
   8  -4   1    8.66    0.94
   8  -4   1   10.93    0.93
   8  -4   1   11.46    0.91
  -8  -4  -1    9.39    0.93
   8   4   1    9.20    1.06
  -9  -4  -1    5.63    0.88
   9  -4   1    4.64    0.67
   9  -4   1    5.64    0.68
  -9  -4  -1    4.69    0.63
   9  -4   1    5.28    0.44
  -9  -4  -1    5.56    0.71
   9  -4   1    5.44    0.44
   9  -4   1    5.03    0.74
   9  -4   1    4.83    0.64
   9   4   1    5.04    0.90
   9   4   1    4.88    0.90
 -10  -4  -1    1.07    0.48
  10  -4   1    1.50    0.47
 -10  -4  -1    1.02    0.45
  10  -4   1    1.16    0.43
  10  -4   1    1.33    0.45
 -10  -4  -1    0.91    0.53
  10  -4   1    1.14    0.53
  10   4   1    2.34    0.67
  10   4   1    0.89    0.64
  11  -4   1   16.99    1.14
 -11  -4  -1   16.15    0.89
 -11  -4  -1   16.40    1.10
 -11  -4  -1   13.46    1.10
  11  -4   1   17.89    1.08
  11  -4   1   17.97    1.06
  11   4   1   16.40    1.33
  12  -4   1    0.17    0.24
 -12  -5   1    3.57    0.39
  12  -5  -1    2.91    0.36
  12  -5  -1    2.56    0.35
 -11  -5   1    9.39    0.84
  11  -5  -1   11.61    0.95
  11  -5  -1   10.80    0.86
  11  -5  -1   11.92    0.85
 -11  -5   1   10.76    0.80
  10  -5  -1   21.25    1.36
 -10  -5   1   24.14    1.58
  10  -5  -1   20.37    1.49
 -10  -5   1   22.00    1.42
 -10  -5   1   20.79    1.08
 -10  -5   1   20.91    1.08
  10  -5  -1   21.93    1.42
 -10  -5   1   19.46    1.40
  10  -5  -1   22.13    1.57
  -9  -5   1   14.55    1.12
  -9  -5   1   13.61    1.14
   9  -5  -1   14.89    1.24
   9  -5  -1   14.32    1.15
  -9  -5   1   14.43    0.91
  -9  -5   1   14.50    1.30
   9  -5  -1   15.54    1.32
   9  -5  -1   15.33    1.13
   9  -5  -1   14.59    0.91
  -8  -5   1    0.21    0.37
   8  -5  -1    0.45    0.30
  -8  -5   1    0.67    0.41
  -8  -5   1    0.73    0.49
   8  -5  -1    0.44    0.40
   8  -5  -1    0.39    0.51
  -8  -5   1    0.12    0.26
   8  -5  -1    0.59    0.51
   8  -5  -1    1.46    0.51
   8  -5  -1    0.71    0.43
  -7  -5   1   20.76    1.41
   7  -5  -1   18.93    1.33
   7  -5  -1   18.32    1.09
   7  -5  -1   18.06    1.36
   7  -5  -1   16.88    1.13
  -7  -5   1   18.15    1.23
  -7  -5   1   17.63    1.05
  -6  -5   1   11.13    0.94
   6  -5  -1   10.43    0.73
  -6  -5   1   11.47    0.70
  -6  -5   1   10.81    0.84
   6  -5  -1   11.20    0.94
   6  -5  -1   11.62    0.91
   5  -5  -1    6.51    0.64
  -5  -5   1    7.56    0.66
   5  -5  -1    6.90    1.19
   4  -5  -1   68.70    3.76
   4  -5  -1   61.29    4.74
   4   5  -1   65.22    3.51
  -3  -5   1    7.39    0.59
   3  -5  -1    7.60    0.55
   3  -5  -1    7.99    1.03
   3  -5  -1    8.39    0.65
   3   5  -1    6.98    0.67
   2  -5  -1   70.99    3.36
   2  -5  -1   65.63    4.69
  -2  -5   1   65.90    3.81
   2  -5  -1   72.69    3.85
  -2  -5   1   70.19    4.62
  -2   5   1   62.47    4.66
   2   5  -1   64.85    4.54
  -1  -5   1  206.44   12.44
   1  -5  -1  192.08   12.54
  -1  -5   1  188.29   10.51
   1  -5  -1  182.11   12.54
   1  -5  -1  194.06   10.52
  -1  -5   1  194.70   12.41
  -1   5   1  182.30   12.53
   0  -5   1 1000.00   56.71
   0  -5   1  872.45   48.05
   0  -5  -1  909.69   56.86
   0  -5   1  858.21   56.68
   0  -5  -1  802.44   56.83
   0  -5  -1  849.77   48.03
   0   5   1  902.90   56.82
   0   5  -1  893.03   42.84
  -1  -5  -1    8.33    0.61
  -1  -5  -1    4.87    0.80
   1  -5   1    8.56    0.74
  -1  -5  -1   11.54    0.98
   1  -5   1    8.63    0.66
   1   5   1    8.15    0.50
   1   5   1    7.27    0.80
  -1   5  -1    8.43    0.54
   2  -5   1   79.27    3.74
   2  -5   1   71.98    4.96
  -2  -5  -1   68.04    5.09
   2  -5   1   75.96    4.17
  -2  -5  -1   72.36    4.10
  -2   5  -1   70.38    3.71
   2   5   1   74.95    3.72
   3  -5   1   43.51    3.34
   3  -5   1   50.59    2.76
  -3  -5  -1   44.25    2.65
   3  -5   1   47.28    2.50
   3   5   1   48.22    2.53
   4  -5   1  190.77    9.54
   4  -5   1  150.88   11.41
  -4  -5  -1  157.99    9.36
   4   5   1  188.31    8.67
   5  -5   1   15.61    0.99
  -5  -5  -1   13.25    1.06
   6  -5   1   61.87    3.41
   6  -5   1   63.93    2.98
  -6  -5  -1   58.29    3.63
   6  -5   1   62.74    3.52
  -6  -5  -1   61.57    3.40
  -7  -5  -1   13.29    1.04
   7  -5   1   12.96    1.05
   7  -5   1   14.42    1.09
   7  -5   1   14.32    0.93
   7  -5   1   10.90    0.94
   7  -5   1   13.18    0.78
  -7  -5  -1   14.44    1.23
   8  -5   1   19.41    1.38
  -8  -5  -1   16.44    1.36
  -8  -5  -1   18.39    1.55
   8  -5   1   20.46    1.01
  -8  -5  -1   18.67    1.32
   8  -5   1   18.92    1.23
   8  -5   1   19.50    1.01
   8  -5   1   18.40    1.28
   8  -5   1   19.58    1.43
  -9  -5  -1    1.32    0.48
   9  -5   1    0.82    0.44
   9  -5   1    0.70    0.43
   9  -5   1    1.71    0.49
  -9  -5  -1    1.58    0.49
  -9  -5  -1    1.07    0.59
   9  -5   1    0.75    0.50
 -10  -5  -1    1.57    0.33
 -10  -5  -1    1.43    0.47
  10  -5   1    1.35    0.37
  10  -5   1    1.11    0.48
  10  -5   1    2.03    0.48
 -10  -5  -1    1.49    0.48
  10  -5   1    1.00    0.43
  10   5   1    2.29    0.64
  11  -5   1   12.80    0.86
 -11  -5  -1   12.33    0.90
  11  -5   1   11.20    0.83
  11  -6  -1   13.10    0.92
  11  -6  -1   12.55    0.95
 -11  -6   1   12.88    0.92
  11  -6  -1   14.07    0.90
  10  -6  -1    4.88    0.72
 -10  -6   1    5.56    0.61
 -10  -6   1    6.62    0.71
  10  -6  -1    6.14    0.65
  10  -6  -1    6.09    0.66
  10  -6  -1    6.79    0.70
  -9  -6   1    5.54    0.75
  -9  -6   1    6.13    0.42
   9  -6  -1    5.55    0.81
   9  -6  -1    4.86    0.30
   9  -6  -1    3.95    0.71
  -9  -6   1    4.03    0.63
   9  -6  -1    6.45    0.72
  -9  -6   1    5.74    0.41
   9  -6  -1    5.17    0.66
   9  -6  -1    5.56    0.66
  -9  -6   1    4.03    0.61
   8  -6  -1   -0.28    0.46
  -8  -6   1   -0.25    0.37
   8  -6  -1    0.67    0.45
  -8  -6   1    0.11    0.24
   8  -6  -1   -0.51    0.36
   8  -6  -1    0.25    0.41
  -8  -6   1   -0.20    0.37
  -8  -6   1   -0.09    0.42
   8  -6  -1   -0.10    0.53
   8  -6  -1   -0.17    0.24
   7  -6  -1    1.59    0.55
  -7  -6   1    1.39    0.27
   7  -6  -1    1.43    0.31
   7  -6  -1    1.56    0.40
  -7  -6   1    1.87    0.49
  -7  -6   1    1.31    0.39
  -7  -6   1    1.48    0.40
   7  -6  -1    1.21    0.41
   7  -6  -1    2.69    0.49
   7  -6  -1    1.38    0.49
  -6  -6   1    1.01    0.30
   6  -6  -1    0.42    0.23
  -6  -6   1    0.82    0.21
   6  -6  -1    0.66    0.35
  -6  -6   1    1.14    0.37
   6  -6  -1    0.93    0.33
  -5  -6   1   25.97    1.34
  -5  -6   1   27.40    1.55
   5  -6  -1   25.91    1.65
  -5  -6   1   28.89    1.68
   4  -6  -1   31.62    1.98
  -4  -6   1   33.24    1.99
   4  -6  -1   38.60    2.14
   4  -6  -1   31.55    2.77
   4   6  -1   38.00    2.07
  -3  -6   1   34.99    2.19
   3  -6  -1   34.74    2.86
   3  -6  -1   39.67    2.26
   3   6  -1   39.56    2.10
  -2  -6   1   31.24    1.98
   2  -6  -1   34.09    2.55
   2  -6  -1   34.68    2.02
   2   6  -1   32.99    1.81
   1  -6  -1  206.82   11.13
  -1  -6   1  229.05   13.18
  -1  -6   1  205.10   13.13
   1  -6  -1  177.40   13.23
  -1  -6   1  192.18   11.11
   0  -6  -1    1.31    0.42
   0  -6  -1    2.14    0.33
   0  -6   1    1.17    0.31
   0  -6   1    1.21    0.30
   0  -6   1    0.75    0.27
   0   6  -1    1.12    0.22
  -1  -6  -1   28.88    1.79
  -1  -6  -1   29.26    2.31
   1  -6   1   31.15    2.14
   1  -6   1   31.56    1.85
   1   6   1   28.35    1.52
  -2  -6  -1   68.46    5.00
  -2  -6  -1   67.63    4.02
   2  -6   1   70.99    4.85
   2  -6   1   75.80    4.10
   2   6   1   73.59    3.63
   3  -6   1    8.41    0.75
   3  -6   1    9.71    1.02
  -4  -6  -1   17.70    1.22
   4  -6   1   20.71    1.33
   4  -6   1   17.85    1.13
   4  -6   1   19.48    1.76
   5  -6   1    7.24    0.39
  -5  -6  -1    7.72    0.73
   5  -6   1    7.32    0.40
   5  -6   1    7.16    0.62
   6  -6   1   -0.03    0.26
   6  -6   1    0.16    0.13
   6  -6   1    0.36    0.11
  -6  -6  -1    0.20    0.31
  -6  -6  -1    0.00    0.34
   6  -6   1    0.26    0.32
   7  -6   1    3.49    0.49
  -7  -6  -1    3.75    0.53
  -7  -6  -1    2.60    0.52
   7  -6   1    3.05    0.44
   7  -6   1    2.55    0.58
  -7  -6  -1    3.21    0.62
   7  -6   1    3.34    0.53
   7  -6   1    3.47    0.49
   8  -6   1    0.48    0.38
   8  -6   1    1.06    0.47
   8  -6   1    0.87    0.56
   8  -6   1    0.26    0.37
  -8  -6  -1    0.50    0.52
  -8  -6  -1    0.48    0.45
  -8  -6  -1    0.58    0.43
  -8  -6  -1    0.56    0.30
   8  -6   1    0.38    0.38
  -9  -6  -1    6.37    0.54
   9  -6   1    5.47    0.63
   9  -6   1    7.15    0.67
  -9  -6  -1    4.76    0.67
   9  -6   1    5.95    0.62
   9  -6   1    5.54    0.69
  -9  -6  -1    5.44    0.69
  10  -6   1    2.99    0.49
 -10  -6  -1    2.50    0.22
 -10  -6  -1    1.85    0.48
 -10  -6  -1    1.81    0.47
 -10  -6  -1    2.45    0.23
  10  -6   1    1.96    0.46
  10  -6   1    1.77    0.43
 -11  -6  -1    1.23    0.37
  11  -6   1    1.48    0.33
  11  -6   1    0.81    0.31
  11  -7  -1    0.50    0.32
 -11  -7   1   -0.12    0.30
  11  -7  -1   -0.08    0.29
 -10  -7   1   -0.18    0.37
  10  -7  -1    0.24    0.40
 -10  -7   1    0.07    0.28
  10  -7  -1    0.37    0.41
  10  -7  -1    0.21    0.39
  -9  -7   1   11.84    0.91
   9  -7  -1    9.02    1.02
  -9  -7   1   11.66    0.99
   9  -7  -1   12.08    1.02
   9  -7  -1   10.47    0.95
   9  -7  -1   11.45    1.03
   9  -7  -1   12.28    0.95
   8  -7  -1    2.80    0.51
   8  -7  -1    2.69    0.67
   8  -7  -1    2.45    0.60
  -8  -7   1    3.32    0.53
   8  -7  -1    3.79    0.57
  -8  -7   1    3.72    0.56
   8  -7  -1    2.53    0.52
  -7  -7   1    0.06    0.32
   7  -7  -1    0.50    0.21
  -7  -7   1    0.19    0.16
   7  -7  -1   -0.18    0.36
   7  -7  -1    0.29    0.36
   7  -7  -1   -0.04    0.40
   7  -7  -1    0.22    0.50
  -7  -7   1    0.16    0.17
   7  -7  -1    0.40    0.36
  -7  -7   1    0.23    0.37
  -7  -7   1    0.45    0.34
   7  -7  -1    0.38    0.18
   6  -7  -1   11.73    0.64
  -6  -7   1   10.39    0.81
   6  -7  -1   11.07    0.97
   6  -7  -1   11.51    0.90
  -6  -7   1   11.79    0.91
  -6  -7   1   11.38    0.62
  -6  -7   1   10.63    0.61
   6  -7  -1    9.65    0.65
   5  -7  -1    5.31    0.41
   5  -7  -1    5.63    0.59
  -5  -7   1    5.19    0.33
  -5  -7   1    5.20    0.48
   5  -7  -1    6.38    0.58
  -5  -7   1    5.52    0.34
   5  -7  -1    6.14    0.40
   4  -7  -1   10.43    0.77
   4  -7  -1   11.61    0.91
   3  -7  -1    5.83    0.63
   3  -7  -1    6.01    0.96
   3  -7  -1    5.57    0.49
   2  -7  -1   17.15    1.54
  -2  -7   1   15.25    1.14
   2  -7  -1   18.18    1.20
  -1  -7   1   61.20    3.55
   1  -7  -1   64.02    3.56
   1  -7  -1   55.06    4.30
  -1  -7   1   64.07    4.18
   0  -7  -1    2.41    0.39
   0  -7  -1    2.10    0.53
   0  -7   1    1.93    0.40
   0  -7   1    2.70    0.42
  -1  -7  -1   37.42    2.25
   1  -7   1   39.15    2.66
   1  -7   1   36.95    2.28
  -1  -7  -1   34.91    2.81
  -2  -7  -1   99.52    5.73
   2  -7   1  108.53    5.80
   2  -7   1  102.94    6.85
  -2  -7  -1   96.78    7.00
   3  -7   1   67.69    4.94
   3  -7   1   73.81    4.13
   4  -7   1    0.51    0.33
   4  -7   1    0.27    0.16
  -5  -7  -1    1.81    0.36
   5  -7   1    2.15    0.31
   5  -7   1    2.19    0.36
  -5  -7  -1    1.63    0.27
   6  -7   1   28.92    1.80
  -6  -7  -1   32.92    1.59
  -6  -7  -1   31.78    1.83
   6  -7   1   27.88    1.79
  -7  -7  -1    0.83    0.42
   7  -7   1    0.61    0.33
   7  -7   1    0.62    0.33
  -7  -7  -1    0.65    0.27
   7  -7   1    0.49    0.51
  -7  -7  -1    0.76    0.41
   7  -7   1    1.31    0.41
   7  -7   1    0.52    0.34
  -8  -7  -1    0.69    0.44
   8  -7   1    0.04    0.55
   8  -7   1    1.50    0.43
   8  -7   1    0.74    0.38
  -8  -7  -1    1.23    0.29
  -8  -7  -1    0.63    0.45
   8  -7   1    0.39    0.42
  -9  -7  -1    4.58    0.38
  -9  -7  -1    5.17    0.38
   9  -7   1    5.24    0.57
   9  -7   1    4.63    0.59
  -9  -7  -1    3.85    0.61
   9  -7   1    5.93    0.63
  -9  -7  -1    5.23    0.65
  10  -7   1   10.20    0.76
 -10  -7  -1    9.44    0.82
 -10  -7  -1    8.06    0.73
  10  -7   1    8.75    0.70
 -11  -7  -1    0.09    0.29
  11  -7   1    0.36    0.25
  11  -7   1    0.35    0.26
 -11  -8   1    0.84    0.28
  11  -8  -1    1.29    0.29
  11  -8  -1    0.82    0.28
  10  -8  -1    3.42    0.48
 -10  -8   1    4.04    0.52
  10  -8  -1    3.13    0.46
  10  -8  -1    4.35    0.53
   9  -8  -1   17.41    1.11
   9  -8  -1   16.05    1.19
  -9  -8   1   15.72    1.03
  -9  -8   1   17.06    1.18
   9  -8  -1   16.47    1.21
   9  -8  -1   16.90    1.35
   8  -8  -1   17.97    1.16
   8  -8  -1   18.45    1.32
  -8  -8   1   17.22    1.15
   8  -8  -1   16.49    1.46
  -8  -8   1   17.00    1.23
   8  -8  -1   18.75    1.24
   8  -8  -1   17.27    1.24
   7  -8  -1   11.90    1.10
   7  -8  -1   10.05    0.91
  -7  -8   1   11.05    0.84
   7  -8  -1    9.24    0.82
   7  -8  -1   11.29    0.85
   7  -8  -1   10.91    0.96
  -7  -8   1   10.96    0.88
   6  -8  -1   43.21    2.73
  -6  -8   1   47.28    2.48
   6  -8  -1   44.58    2.61
   6  -8  -1   45.38    2.64
  -5  -8   1   24.43    1.33
   5  -8  -1   22.52    1.44
   5  -8  -1   22.15    1.46
   4  -8  -1    8.47    0.85
   4  -8  -1   10.05    0.69
  -4  -8   1    8.17    0.57
   3  -8  -1   77.46    4.42
   3  -8  -1   85.22    4.69
   2  -8  -1    4.45    0.80
   2  -8  -1    3.93    0.56
  -2  -8   1    5.57    0.61
   1  -8  -1   11.36    0.92
   1  -8  -1   10.40    1.13
  -1  -8   1   10.89    0.88
  -1  -8   1   10.44    0.99
   0  -8   1   80.17    4.74
   0  -8   1   87.50    5.56
   0  -8  -1   82.39    4.74
   0  -8  -1   80.18    5.72
  -1  -8  -1  214.39   11.99
  -1  -8  -1  195.39   14.30
   1  -8   1  218.69   12.03
   1  -8   1  238.99   14.18
  -2  -8  -1   83.37    4.92
   2  -8   1   88.86    4.99
   2  -8   1   89.51    5.89
  -2  -8  -1   83.75    6.05
  -3  -8  -1  108.16    5.26
   3  -8   1  117.97    6.44
   3  -8   1  114.02    5.40
  -4  -8  -1   85.56    3.96
   4  -8   1   85.91    4.91
  -4  -8  -1   81.55    3.96
  -5  -8  -1    0.43    0.18
   5  -8   1    0.27    0.24
  -5  -8  -1    0.04    0.27
  -6  -8  -1   -0.05    0.33
   6  -8   1    0.35    0.49
   6  -8   1    0.06    0.28
   6  -8   1   -0.27    0.28
  -6  -8  -1    0.11    0.20
  -6  -8  -1    0.21    0.32
   6  -8   1    1.16    0.30
   7  -8   1   36.61    1.99
   7  -8   1   36.90    2.08
  -7  -8  -1   38.65    2.23
  -7  -8  -1   38.32    1.87
  -7  -8  -1   38.93    2.18
  -7  -8  -1   38.28    1.87
   7  -8   1   35.80    2.39
   7  -8   1   39.67    2.20
   8  -8   1    3.17    0.45
   8  -8   1    2.56    0.67
   8  -8   1    2.79    0.48
  -8  -8  -1    2.38    0.53
  -8  -8  -1    2.34    0.48
   8  -8   1    3.00    0.48
   9  -8   1    9.18    0.78
   9  -8   1   10.83    0.86
  -9  -8  -1   11.47    0.95
  -9  -8  -1   10.98    0.86
 -10  -8  -1   13.53    0.99
  10  -8   1   14.45    0.87
  10  -8   1   14.28    0.91
 -10  -8  -1   13.35    0.86
 -11  -8  -1    6.13    0.55
  11  -8   1    6.67    0.48
  11  -9  -1    1.26    0.23
 -11  -9   1    1.39    0.25
  10  -9  -1    2.44    0.38
  10  -9  -1    2.20    0.40
 -10  -9   1    1.72    0.38
  -9  -9   1    1.58    0.43
   9  -9  -1    1.36    0.59
   9  -9  -1    1.89    0.42
   9  -9  -1    2.01    0.46
   8  -9  -1   34.21    2.09
   8  -9  -1   35.09    2.30
   8  -9  -1   35.70    2.02
  -8  -9   1   35.34    2.02
   8  -9  -1   36.29    1.92
   7  -9  -1   53.93    2.75
   7  -9  -1   53.11    3.02
   7  -9  -1   52.74    2.87
  -7  -9   1   53.35    2.88
   7  -9  -1   53.43    3.24
  -7  -9   1   54.42    2.85
   6  -9  -1   38.57    2.47
   6  -9  -1   44.85    2.33
   6  -9  -1   45.12    2.34
   6  -9  -1   41.03    2.64
  -6  -9   1   43.32    2.33
   6  -9  -1   42.70    2.48
  -6  -9   1   45.18    2.31
   5  -9  -1   61.00    3.49
  -5  -9   1   63.57    3.27
   5  -9  -1   63.08    3.43
   4  -9  -1    1.87    0.35
   4  -9  -1    1.70    0.28
   4  -9  -1    2.04    0.50
   3  -9  -1   35.56    2.15
   3  -9  -1   31.17    1.85
   2  -9  -1   48.42    2.87
  -2  -9   1   46.17    2.29
  -2  -9   1   45.41    2.83
   1  -9  -1   62.22    3.72
  -1  -9   1   63.83    3.03
  -1  -9   1   62.28    3.72
   0  -9   1   23.05    1.15
   0  -9   1   20.83    1.54
   0  -9  -1   24.34    1.57
  -1  -9  -1   49.85    3.08
   1  -9   1   51.64    2.48
   1  -9   1   52.36    3.12
   2  -9   1   97.93    5.12
   2  -9   1  102.66    4.83
  -2  -9  -1  100.08    5.76
   2  -9   1  103.98    5.83
   3  -9   1   37.59    1.92
   3  -9   1   37.96    2.42
   4  -9   1    5.14    0.75
  -4  -9  -1    6.25    0.55
   4  -9   1    6.00    0.79
  -5  -9  -1  110.49    5.80
   6  -9   1    3.36    0.64
   6  -9   1    4.31    0.44
   6  -9   1    4.24    0.45
  -6  -9  -1    4.51    0.55
  -6  -9  -1    4.40    0.53
   7  -9   1   13.44    0.93
   7  -9   1   11.67    1.14
  -7  -9  -1   12.81    1.03
  -7  -9  -1   14.63    0.98
   7  -9   1   11.69    0.84
  -8  -9  -1    6.32    0.72
  -8  -9  -1    5.56    0.59
   8  -9   1    6.23    0.55
   8  -9   1    7.13    0.62
   8  -9   1    4.70    0.78
   9  -9   1    1.55    0.38
  -9  -9  -1    1.15    0.29
   9  -9   1    1.41    0.33
  -9  -9  -1    2.01    0.48
  10  -9   1   31.35    1.68
 -10  -9  -1   32.18    1.78
 -10 -10   1    2.38    0.35
  10 -10  -1    2.75    0.32
  10 -10  -1    3.29    0.36
   9 -10  -1    0.14    0.31
  -9 -10   1   -0.44    0.32
   9 -10  -1    0.22    0.34
   9 -10  -1   -0.14    0.51
   8 -10  -1   -0.24    0.32
  -8 -10   1    0.49    0.38
   8 -10  -1    0.19    0.58
   8 -10  -1    0.31    0.38
   7 -10  -1   26.09    1.49
   7 -10  -1   23.05    1.38
   7 -10  -1   23.23    1.75
  -7 -10   1   24.52    1.47
   6 -10  -1    0.20    0.31
   6 -10  -1    0.10    0.32
  -6 -10   1    0.65    0.32
   6 -10  -1    0.37    0.33
   6 -10  -1    0.97    0.55
   6 -10  -1   -0.35    0.35
   5 -10  -1    0.61    0.32
   5 -10  -1    0.54    0.29
   5 -10  -1    0.69    0.43
   5 -10  -1    0.63    0.47
  -5 -10   1    1.02    0.30
   4 -10  -1   44.28    2.82
   3 -10  -1    3.43    0.61
  -2 -10   1    2.70    0.55
  -2 -10   1    2.12    0.30
   2 -10  -1    2.69    0.55
   1 -10  -1   26.42    1.80
  -1 -10   1   25.40    1.34
  -1 -10   1   27.16    1.80
   0 -10  -1    0.59    0.41
   0 -10   1    1.46    0.44
   0 -10   1    1.13    0.22
   1 -10   1   37.83    2.49
  -1 -10  -1   34.80    2.34
   1 -10   1   35.81    2.37
   1 -10   1   37.82    1.83
  -2 -10  -1    5.25    0.71
   2 -10   1    6.96    0.86
   2 -10   1    6.02    0.80
   2 -10   1    6.78    0.48
   2 -10   1    5.76    0.47
   3 -10   1    5.68    0.78
  -3 -10  -1    5.37    0.44
   3 -10   1    5.30    0.46
   3 -10   1    4.87    0.49
   3 -10   1    6.37    0.84
   4 -10   1   13.20    1.26
  -4 -10  -1   14.84    0.90
   4 -10   1   14.38    1.27
   5 -10   1    0.22    0.24
  -5 -10  -1    0.46    0.27
  -5 -10  -1    0.52    0.33
   5 -10   1   -0.01    0.43
   6 -10   1   19.81    1.51
  -6 -10  -1   20.34    1.28
  -6 -10  -1   20.66    1.20
   6 -10   1   17.31    1.15
  -7 -10  -1    5.69    0.65
   7 -10   1    4.70    0.51
  -7 -10  -1    5.32    0.51
   7 -10   1    5.35    0.80
   8 -10   1    8.45    0.67
   8 -10   1    7.16    0.86
  -8 -10  -1    7.00    0.73
   9 -10   1    0.48    0.27
  -9 -10  -1    0.44    0.38
 -10 -10  -1    2.64    0.37
 -10 -11   1    0.37    0.18
  -9 -11   1    0.22    0.28
   9 -11  -1    0.25    0.28
   8 -11  -1    0.42    0.30
  -8 -11   1    0.09    0.32
   8 -11  -1    0.51    0.35
   8 -11  -1    0.43    0.57
   7 -11  -1    0.29    0.30
  -7 -11   1    0.58    0.34
   7 -11  -1    0.12    0.60
   7 -11  -1    0.68    0.35
   6 -11  -1    0.64    0.56
   6 -11  -1    0.51    0.31
  -6 -11   1    0.81    0.34
   6 -11  -1    0.19    0.32
  -5 -11   1    6.14    0.55
   5 -11  -1    6.18    0.79
   5 -11  -1    6.84    0.81
   5 -11  -1    6.86    0.57
   4 -11  -1    1.90    0.32
   4 -11  -1    1.66    0.49
   4 -11  -1    2.36    0.50
   2 -11  -1    6.41    0.80
  -2 -11   1    6.83    0.83
  -1 -11   1    1.37    0.26
  -1 -11   1    1.38    0.51
   1 -11  -1    0.84    0.48
   0 -11   1    2.46    0.31
   0 -11   1    2.81    0.59
   0 -11  -1    2.73    0.57
   0 -11   1    2.94    0.65
   1 -11   1    0.80    0.53
   1 -11   1    0.90    0.25
   1 -11   1    0.21    0.41
  -1 -11  -1    0.19    0.42
   2 -11   1    0.11    0.17
   2 -11   1    0.38    0.25
   2 -11   1   -0.27    0.45
   2 -11   1   -0.26    0.41
   3 -11   1   19.00    1.62
   3 -11   1   18.70    1.10
   3 -11   1   19.77    1.15
   4 -11   1    0.61    0.60
   4 -11   1   -0.30    0.40
  -4 -11  -1    0.43    0.29
   4 -11   1    0.81    0.45
   4 -11   1   -1.31    0.36
   5 -11   1   10.69    0.99
  -5 -11  -1    9.90    0.79
   5 -11   1    9.71    0.98
  -6 -11  -1    3.67    0.53
   6 -11   1    4.06    0.73
  -7 -11  -1    0.13    0.38
   7 -11   1    0.03    0.57
  -8 -11  -1   -0.14    0.35
  -9 -11  -1    0.28    0.30
 -10 -11  -1    0.21    0.20
  -9 -12   1    2.66    0.29
  -8 -12   1    1.46    0.30
   8 -12  -1    1.12    0.31
   8 -12  -1    0.49    0.54
   7 -12  -1   11.84    0.84
   7 -12  -1   12.96    1.23
  -7 -12   1   12.21    0.83
   6 -12  -1    4.02    0.68
   6 -12  -1    4.42    0.48
  -6 -12   1    4.77    0.47
   6 -12  -1    4.37    0.76
   5 -12  -1   12.95    1.24
   5 -12  -1   16.74    1.27
   5 -12  -1   14.58    0.93
   5 -12  -1   15.02    0.95
   4 -12  -1   23.36    1.69
   4 -12  -1   22.13    1.29
   4 -12  -1   23.63    1.59
   3 -12  -1    7.10    0.72
   3 -12  -1    6.27    0.77
  -2 -12   1    1.17    0.41
   2 -12  -1    0.63    0.44
  -2 -12   1    0.66    0.28
  -1 -12   1    6.76    0.65
  -1 -12   1    5.64    0.48
   0 -12   1    2.41    0.34
   1 -12   1   49.45    2.49
   1 -12   1   50.43    3.36
   2 -12   1    7.10    0.58
  -2 -12  -1    6.63    0.67
   2 -12   1    6.98    0.85
   2 -12   1    7.49    1.01
   2 -12   1    8.63    0.60
   2 -12   1    8.89    0.77
   3 -12   1   29.98    1.82
   3 -12   1   29.50    2.13
   3 -12   1   31.15    2.31
  -3 -12  -1   31.18    1.69
   3 -12   1   32.87    1.74
  -4 -12  -1   15.95    0.99
   4 -12   1   13.84    1.23
   4 -12   1   15.67    1.23
  -5 -12  -1    1.05    0.35
   5 -12   1    0.31    0.52
   5 -12   1    0.70    0.48
  -6 -12  -1    5.83    0.61
   6 -12   1    7.27    0.86
  -7 -12  -1    0.09    0.32
   7 -12   1    0.25    0.56
  -8 -12  -1    3.69    0.45
  -9 -12  -1    0.04    0.22
   8 -13  -1   22.50    1.53
   7 -13  -1    4.07    0.71
   6 -13  -1    1.89    0.65
   6 -13  -1    2.11    0.58
   5 -13  -1   24.94    1.87
   5 -13  -1   27.48    1.81
   4 -13  -1    0.41    0.50
   4 -13  -1    0.55    0.50
   3 -13  -1    1.68    0.54
  -3 -13   1    2.17    0.48
   3 -13  -1    1.77    0.49
  -2 -13   1    0.76    0.39
   2 -13  -1    1.03    0.51
  -1 -13   1    4.72    0.49
   1 -13  -1    5.28    0.74
  -1 -13   1    4.91    0.61
  -1 -13   1    7.83    0.84
   0 -13   1    0.63    0.27
   0 -13   1    1.15    0.40
   0 -13   1    0.34    0.43
   0 -13  -1    1.06    0.48
   1 -13   1    3.26    0.39
   1 -13   1    3.26    0.64
   1 -13   1    2.93    0.41
   1 -13   1    4.36    0.57
   2 -13   1   11.37    0.77
   2 -13   1   11.61    0.79
  -2 -13  -1   11.83    0.91
   2 -13   1   10.59    1.10
   2 -13   1   10.74    0.96
   3 -13   1   37.89    2.14
   3 -13   1   37.11    2.51
  -3 -13  -1   37.93    1.98
  -3 -13  -1   36.88    2.13
   4 -13   1    1.73    0.54
   4 -13   1    1.45    0.55
  -4 -13  -1    1.70    0.32
   5 -13   1   17.29    1.37
  -5 -13  -1   18.28    1.10
   5 -13   1   17.46    1.41
  -6 -13  -1    6.81    0.57
   6 -13   1    4.40    0.73
   7 -13   1    4.85    0.70
  -7 -13  -1    4.49    0.47
  -8 -13  -1    0.24    0.22
  -8 -14   1    7.73    0.66
   7 -14  -1    4.48    0.64
  -7 -14   1    3.01    0.51
   6 -14  -1   18.03    1.50
   6 -14  -1   23.44    1.53
  -6 -14   1   20.57    1.36
  -5 -14   1    0.48    0.45
   5 -14  -1    0.03    0.51
   5 -14  -1    0.62    0.54
  -4 -14   1   37.09    2.12
   4 -14  -1   35.41    2.46
   4 -14  -1   37.08    2.29
  -3 -14   1    3.81    0.57
   3 -14  -1    3.06    0.68
  -2 -14   1    3.62    0.58
   2 -14  -1    4.00    0.72
  -1 -14   1    1.92    0.47
   1 -14  -1    0.64    0.53
  -1 -14   1    0.93    0.52
   0 -14  -1    7.96    0.86
   0 -14   1    4.91    0.51
   0 -14   1    8.39    0.91
   0 -14   1    5.86    0.65
   1 -14   1    1.03    0.31
   1 -14   1    0.87    0.26
   1 -14   1    1.32    0.44
   1 -14   1    1.15    0.57
   2 -14   1   20.65    1.20
   2 -14   1   18.46    1.32
   2 -14   1   20.28    1.56
  -2 -14  -1   20.06    1.31
   3 -14   1    9.83    0.80
   3 -14   1    5.90    0.85
  -3 -14  -1    7.93    0.75
   4 -14   1   59.73    3.34
  -4 -14  -1   58.48    3.09
   4 -14   1   53.81    3.61
   5 -14   1    2.94    0.59
   5 -14   1    2.58    0.58
  -5 -14  -1    2.58    0.34
   6 -14   1    0.47    0.49
  -6 -14  -1    0.10    0.23
  -8 -14  -1    1.58    0.34
  -7 -15   1    1.58    0.38
   7 -15  -1    2.60    0.48
   6 -15  -1    3.02    0.56
   6 -15  -1    3.88    0.59
  -6 -15   1    2.86    0.51
  -5 -15   1   15.68    1.13
   5 -15  -1   16.63    1.24
   5 -15  -1   15.05    1.30
  -4 -15   1   17.15    1.20
   4 -15  -1   15.18    1.38
   4 -15  -1   18.52    1.30
   3 -15  -1   -0.05    0.55
  -3 -15   1    0.60    0.44
  -2 -15   1   27.41    1.74
   2 -15  -1   31.95    2.13
   1 -15  -1    3.45    0.69
  -1 -15   1    3.78    0.67
  -1 -15   1    3.80    0.55
   0 -15  -1    4.15    0.72
   0 -15   1    5.65    0.51
   0 -15   1    5.40    0.63
   0 -15   1    4.53    0.73
   1 -15   1   39.80    2.70
   1 -15   1   41.84    2.21
   1 -15   1   39.42    2.26
   2 -15   1   36.47    2.42
   2 -15   1   33.66    1.98
  -3 -15  -1   22.91    1.50
   3 -15   1   26.09    1.83
   4 -15   1    4.75    0.74
  -4 -15  -1    4.61    0.59
  -5 -15  -1    2.14    0.46
   5 -15   1    2.57    0.55
   5 -15   1    2.73    0.53
   6 -15   1    6.88    0.71
  -6 -15  -1    7.58    0.67
  -7 -15  -1    2.77    0.40
   6 -16  -1    2.86    0.46
  -6 -16   1    3.06    0.43
   6 -16  -1    3.05    0.46
   5 -16  -1    9.97    0.96
   5 -16  -1   10.59    0.87
  -5 -16   1    9.80    0.81
   4 -16  -1    5.52    0.74
  -4 -16   1    4.82    0.58
  -3 -16   1    3.44    0.52
   3 -16  -1    3.88    0.70
  -2 -16   1   10.17    0.88
   2 -16  -1   11.54    1.14
  -1 -16   1   21.81    1.47
   1 -16  -1   26.54    1.84
  -1 -16   1   25.88    1.77
   0 -16   1   40.22    2.35
   0 -16  -1   44.59    2.82
   0 -16   1   44.22    2.80
   1 -16   1    0.27    0.55
   1 -16   1    0.68    0.40
   2 -16   1    8.77    1.00
   3 -16   1   -0.06    0.48
   4 -16   1    0.05    0.46
  -4 -16  -1    0.14    0.35
  -5 -16  -1    1.66    0.39
   5 -16   1    2.53    0.50
  -6 -16  -1   -0.03    0.27
   6 -16   1    0.02    0.31
   5 -17  -1    6.75    0.67
  -5 -17   1    5.66    0.52
   4 -17  -1   -0.09    0.43
  -4 -17   1   -0.12    0.30
   3 -17  -1    1.01    0.51
  -3 -17   1    0.99    0.38
  -2 -17   1    0.26    0.36
   2 -17  -1    0.13    0.51
   1 -17  -1    3.16    0.62
  -1 -17   1    2.92    0.55
  -1 -17   1    1.52    0.41
   0 -17   1    8.02    0.86
   0 -17  -1   10.17    0.94
   0 -17   1    7.64    0.69
   1 -17   1    0.71    0.50
   2 -17   1    0.92    0.50
   3 -17   1    0.11    0.45
   4 -17   1    3.78    0.56
   5 -17   1    8.37    0.75
   4 -18  -1   12.78    0.96
  -3 -18   1    6.20    0.56
   3 -18  -1    7.27    0.72
   2 -18  -1    5.90    0.68
  -2 -18   1    5.21    0.51
   1 -18  -1    0.54    0.43
   0 -18   1    0.49    0.41
   0 -18  -1    0.74    0.40
   1 -18   1    0.52    0.42
   2 -18   1    1.43    0.45
   3 -18   1    6.99    0.71
   4 -18   1    8.38    0.72
   3 -19  -1    5.12    0.53
   2 -19  -1    7.25    0.67
   1 -19  -1   12.77    0.95
   0 -19   1    2.83    0.40
   1 -19   1   13.56    0.99
   2 -19   1    3.82    0.46
 -12   0   2    3.67    0.47
  12   0  -2    3.84    0.51
 -11   0   2   44.56    2.90
  11   0  -2   53.09    3.15
 -11   0   2   53.11    2.78
  11   0  -2   51.03    3.08
  11   0  -2   53.33    2.72
 -11   0   2   49.92    3.16
 -10   0   2    0.90    0.44
  10   0  -2    1.41    0.62
  10   0  -2    0.55    0.54
 -10   0   2    0.72    0.50
  10   0  -2    2.01    0.72
 -10   0   2    1.60    0.63
  -9   0   2    8.76    0.94
  -9   0   2    7.39    0.78
   9   0  -2    8.85    0.86
   9   0  -2    9.90    1.12
  -9   0   2    5.08    0.87
   9   0  -2    9.48    1.07
  -8   0   2   49.91    2.80
   8   0  -2   45.93    2.89
  -8   0   2   47.82    3.01
   8   0  -2   49.59    3.00
   8   0  -2   44.87    2.56
  -7   0   2   11.98    0.91
   7   0  -2    9.90    0.99
   7   0  -2   11.57    1.06
  -7   0   2   10.59    1.02
  -6   0   2   34.88    2.17
   6   0  -2   34.53    2.15
   4   0  -2    5.94    0.91
   4   0  -2    6.08    0.61
   3   0  -2  289.06   19.51
  -3   0   2  312.44   19.55
  -2   0   2  759.26   46.26
   2   0  -2  683.35   46.22
   1   0  -2  452.34   29.35
   1   0  -2  471.58   29.36
  -1   0   2  449.07   29.37
   0   0  -2  446.33   27.27
   0   0  -2  413.78   27.25
   0   0   2  414.62   27.28
  -1   0  -2   42.82    2.81
  -1   0  -2   40.96    2.80
   1   0   2   44.69    2.83
   1   0   2   40.68    2.12
   1   0   2   39.38    2.81
  -1   0  -2   37.09    2.11
   2   0   2  107.14    6.86
  -2   0  -2   99.96    5.16
   2   0   2  102.91    5.15
   2   0   2  101.88    6.87
   3   0   2    0.37    0.36
   3   0   2    0.65    0.24
   3   0   2    1.32    0.45
   4   0   2  303.41   15.05
   4   0   2  307.43   20.07
   5   0   2   20.34    1.38
   5   0   2   24.50    2.16
   6   0   2   44.86    2.68
   7   0   2  125.66    6.61
   7   0   2  119.00    6.84
   8   0   2    4.08    0.71
   8   0   2    3.25    0.55
  -8   0  -2    6.34    0.87
   8   0   2    3.86    0.57
   8   0   2    3.89    0.65
  -9   0  -2   23.95    1.45
  -9   0  -2   24.07    1.91
   9   0   2   26.12    1.59
   9   0   2   23.91    1.79
   9   0   2   24.49    1.61
   9   0   2   28.05    1.89
  10   0   2   15.50    1.38
  10   0   2   19.49    1.52
  10   0   2   18.07    1.13
 -10   0  -2   19.27    1.58
  10   0   2   20.80    1.32
  10   0   2   18.76    1.30
  11   0   2    0.29    0.41
  11   0   2    0.32    0.18
  11   0   2    0.78    0.17
  11   0   2    0.34    0.41
  11   0   2    0.28    0.44
  12   0   2   13.25    0.85
  12   0   2   14.33    0.89
  12  -1  -2   16.12    1.07
 -12  -1   2   16.44    1.04
  12  -1  -2   16.13    1.03
  12   1  -2   15.31    1.02
  11  -1  -2    0.76    0.45
  11  -1  -2    0.09    0.55
  11  -1  -2    0.20    0.48
 -11  -1   2    0.57    0.49
 -11  -1   2    0.38    0.40
 -11  -1   2    0.05    0.40
  11  -1  -2    0.26    0.48
  11   1  -2    0.69    0.51
 -11   1   2    0.49    0.50
  11   1  -2    0.85    0.49
  11   1  -2    0.23    0.57
 -11   1   2    0.16    0.44
 -10  -1   2    0.67    0.48
  10  -1  -2    0.38    0.49
  10  -1  -2   -0.01    0.53
 -10  -1   2    0.32    0.41
  10  -1  -2    0.56    0.54
 -10  -1   2    0.50    0.56
  10  -1  -2    0.24    0.61
  10   1  -2    0.68    0.59
 -10   1   2    0.40    0.55
  10   1  -2    0.53    0.67
  10   1  -2    0.49    0.52
  -9  -1   2   34.11    2.35
   9  -1  -2   34.48    2.04
   9  -1  -2   36.42    2.36
   9  -1  -2   36.60    2.12
  -9  -1   2   34.66    2.16
  -9  -1   2   31.64    2.00
   9  -1  -2   33.74    2.34
  -9   1   2   34.52    2.39
   9   1  -2   36.10    2.36
   9   1  -2   35.73    2.40
   9   1  -2   31.07    2.00
  -8  -1   2    3.25    0.56
   8  -1  -2    3.48    0.67
   8  -1  -2    3.46    0.66
   8  -1  -2    2.92    0.55
  -8  -1   2    3.14    0.50
  -8  -1   2    4.77    0.72
   8   1  -2    3.89    0.69
  -8   1   2    2.85    0.63
   8   1  -2    4.27    0.70
   7  -1  -2    1.96    0.47
   7  -1  -2    1.19    0.46
  -7  -1   2    0.73    0.38
  -7  -1   2    0.95    0.36
  -7   1   2    1.25    0.43
   7   1  -2    0.84    0.41
  -6  -1   2    0.85    0.34
   6  -1  -2    0.86    0.33
  -6   1   2    0.68    0.33
   4  -1  -2   48.49    2.58
   4  -1  -2   45.41    3.51
   4   1  -2   48.99    2.60
  -3  -1   2   81.01    5.39
   3  -1  -2   80.10    5.40
  -3   1   2   75.29    5.40
   3   1  -2   79.34    5.37
   2  -1  -2   86.13    5.94
  -2   1   2   88.65    5.97
  -2   1   2   96.65    5.98
   2   1  -2   85.55    5.88
   1  -1  -2  205.39   12.59
  -1  -1   2  198.44   12.49
  -1  -1   2  204.26   12.50
   1  -1  -2  184.84   12.56
   1   1  -2  192.10   12.48
  -1   1   2  167.17   12.55
  -1   1   2  203.89   12.58
   0  -1   2   11.74    0.77
   0  -1   2   10.13    0.75
   0  -1  -2    8.82    0.82
   0  -1  -2    8.24    0.59
   0  -1  -2    9.88    0.85
   0   1   2    9.62    0.84
   0   1   2    9.29    0.85
   0   1  -2    8.98    0.71
   0   1  -2   10.18    0.73
  -1  -1  -2   14.90    1.14
  -1  -1  -2   14.38    1.13
   1  -1   2   13.93    1.05
   1  -1   2   14.01    0.83
  -1  -1  -2   11.93    0.80
   1  -1   2   15.46    1.07
  -1   1  -2   12.55    0.82
   1   1   2   14.60    1.15
   1   1   2   12.88    0.81
   1   1   2   13.48    1.12
   2  -1   2   79.17    6.16
   2  -1   2   95.36    6.22
   2  -1   2   96.78    4.69
  -2   1  -2   91.73    4.69
   2   1   2   93.86    4.68
   2   1   2   95.29    6.28
   2   1   2  100.98    6.28
   3  -1   2   76.83    3.78
   3  -1   2   69.19    5.04
   3  -1   2   76.93    5.05
   3   1   2   68.77    5.08
   3   1   2   72.28    3.77
   4  -1   2   73.72    3.83
   4  -1   2   71.69    5.18
   4   1   2   71.98    5.24
   4   1   2   73.02    3.85
   5  -1   2    3.99    0.93
   5  -1   2    5.58    0.54
   5   1   2    3.96    0.50
   6  -1   2   66.62    3.65
  -6  -1  -2   62.20    3.84
   6  -1   2   68.04    3.78
   6   1   2   66.31    3.81
   7  -1   2   19.35    1.36
   7  -1   2   18.25    1.30
  -7  -1  -2   15.45    1.36
   7   1   2   17.53    1.33
   7   1   2   15.88    1.34
   8  -1   2   18.54    1.35
  -8  -1  -2   20.11    1.62
   8  -1   2   19.69    1.32
   8  -1   2   22.38    1.59
   8  -1   2   20.36    1.51
   8   1   2   19.83    1.39
   8   1   2   21.07    1.58
   8   1   2   19.47    1.36
   8   1   2   20.41    1.62
   9  -1   2   22.81    1.68
   9  -1   2   22.67    1.47
   9  -1   2   21.47    1.34
   9  -1   2   24.44    1.52
  -9  -1  -2   25.38    1.85
   9  -1   2   23.52    1.75
   9   1   2   21.63    1.69
   9   1   2   21.88    1.78
   9   1   2   23.10    1.53
   9   1   2   23.03    1.54
  10  -1   2    0.55    0.29
 -10  -1  -2    0.64    0.55
  10  -1   2    0.36    0.44
  10  -1   2    0.37    0.54
  10  -1   2    0.23    0.47
  10  -1   2    1.44    0.47
  10   1   2    0.25    0.49
  10   1   2    1.39    0.56
  10   1   2    0.93    0.48
  10   1   2    0.08    0.56
  11  -1   2   -0.18    0.36
  11  -1   2   -0.09    0.38
  11  -1   2   -0.46    0.38
  11   1   2   -0.75    0.42
  11   1   2    0.27    0.24
  11   1   2    0.52    0.43
  11   1   2    0.08    0.40
  12  -1   2    1.75    0.32
  12  -1   2    1.38    0.31
  12  -2  -2    2.63    0.44
 -12  -2   2    1.92    0.36
  12  -2  -2    1.84    0.39
 -11  -2   2    1.12    0.45
  11  -2  -2    1.62    0.52
 -11  -2   2    1.83    0.47
  11  -2  -2    1.36    0.49
  11  -2  -2    1.95    0.63
 -11  -2   2    1.06    0.51
 -11  -2   2    1.68    0.33
  11  -2  -2    1.65    0.54
  11  -2  -2    1.10    0.35
  11   2  -2    0.64    0.59
  10  -2  -2    2.86    0.62
  10  -2  -2    1.59    0.62
 -10  -2   2    1.72    0.48
 -10  -2   2    2.62    0.57
 -10  -2   2    2.88    0.71
  10  -2  -2    3.80    0.67
  10  -2  -2    3.27    0.77
  10   2  -2    2.49    0.71
  10   2  -2    2.00    0.75
 -10   2   2    1.94    0.67
  -9  -2   2    2.09    0.61
   9  -2  -2    2.33    0.57
   9  -2  -2    3.18    0.75
   9  -2  -2    3.79    0.64
  -9  -2   2    4.55    0.67
  -9  -2   2    2.66    0.52
   9  -2  -2    2.93    0.70
   9   2  -2    3.51    0.77
  -9   2   2    2.88    0.71
   8  -2  -2   34.99    2.03
  -8  -2   2   35.90    2.35
  -8  -2   2   36.82    2.17
  -8  -2   2   33.70    2.02
   8  -2  -2   35.59    2.29
   8  -2  -2   38.65    2.35
   8  -2  -2   34.12    2.10
  -8   2   2   33.81    2.37
  -7  -2   2   51.06    3.06
   7  -2  -2   49.44    3.03
  -7  -2   2   51.56    2.84
   7  -2  -2   47.75    2.95
  -7   2   2   52.76    3.12
  -6  -2   2    3.36    0.49
   6  -2  -2    2.98    0.47
  -6   2   2    3.74    0.55
   4  -2  -2  185.46    9.39
   4  -2  -2  189.96   10.35
   4  -2  -2  191.17   12.62
  -4   2   2  176.34   12.59
   4   2  -2  204.78    9.48
   3  -2  -2    2.47    0.33
  -3  -2   2    2.88    0.53
   3  -2  -2    2.55    0.56
  -3   2   2    2.80    0.57
   3   2  -2    2.86    0.51
   2  -2  -2   24.63    2.00
  -2  -2   2   27.38    1.95
   2   2  -2   26.33    1.91
  -2   2   2   30.45    2.05
  -2   2   2   26.08    2.04
   1  -2  -2   86.38    6.15
   1  -2  -2   99.33    6.21
  -1  -2   2   94.76    6.03
  -1   2   2   97.68    6.18
  -1   2   2   87.02    6.18
   1   2  -2   91.46    6.00
   0  -2   2   28.24    1.76
   0  -2  -2   26.52    1.96
   0  -2  -2   24.54    1.38
   0  -2   2   27.01    1.76
   0  -2  -2   28.63    2.00
   0   2   2   26.77    1.96
   0   2   2   23.91    1.95
   1  -2   2  280.17   13.39
   1  -2   2  276.82   17.61
  -1  -2  -2  309.07   17.81
  -1  -2  -2  271.67   17.77
  -1  -2  -2  268.03   13.33
   1  -2   2  297.46   17.62
   1   2   2  282.00   17.78
  -1   2  -2  249.51   13.37
   1   2   2  267.98   17.77
   1   2   2  238.89   13.33
   2  -2   2   49.27    2.45
   2  -2   2   44.86    3.19
  -2  -2  -2   47.63    3.31
  -2  -2  -2   47.22    3.31
  -2  -2  -2   47.20    2.41
   2   2   2   44.53    2.40
   2   2   2   45.00    3.29
  -2   2  -2   42.67    2.42
   3  -2   2   49.52    2.55
   3  -2   2   50.04    3.43
   3   2   2   46.32    2.55
   3   2   2   43.40    3.47
   4  -2   2    4.86    0.58
   4  -2   2    4.83    0.83
   4   2   2    3.51    0.52
   4   2   2    4.26    0.88
   5  -2   2  152.03    8.68
   5  -2   2  174.24   10.94
   5   2   2  155.69    8.74
  -6  -2  -2    8.11    0.86
   6  -2   2    8.39    0.78
   6  -2   2    7.13    0.73
   6   2   2    7.63    0.79
   7  -2   2   11.21    0.94
   7  -2   2   11.63    0.98
  -7  -2  -2    7.28    0.90
   7   2   2    7.12    0.85
   7   2   2    8.60    0.93
   8  -2   2    5.35    0.76
   8  -2   2    5.99    0.75
   8  -2   2    5.25    0.55
   8  -2   2    5.85    0.63
   8  -2   2    6.88    0.70
  -8  -2  -2    5.98    0.51
  -8  -2  -2    8.37    0.99
   8   2   2    6.11    0.70
   8   2   2    5.51    0.84
   8   2   2    5.91    0.71
   8   2   2    5.24    0.80
   9  -2   2    1.40    0.34
   9  -2   2    0.49    0.56
  -9  -2  -2    0.03    0.54
   9  -2   2    0.81    0.46
   9  -2   2    1.12    0.51
   9  -2   2    0.84    0.43
   9   2   2    1.02    0.64
   9   2   2    0.49    0.50
   9   2   2    0.95    0.46
   9   2   2    1.23    0.60
 -10  -2  -2    7.72    0.98
  10  -2   2    5.38    0.66
  10  -2   2    7.56    0.73
  10  -2   2    6.24    0.48
  10  -2   2    7.57    0.78
  10  -2   2    7.00    0.85
  10  -2   2    8.52    0.51
  10   2   2    7.48    0.78
  10   2   2    7.71    0.99
  10   2   2    4.90    0.72
  10   2   2    6.61    0.85
  11  -2   2    3.74    0.51
  11  -2   2    4.34    0.61
  11  -2   2    4.97    0.55
  11   2   2    5.75    0.64
  11   2   2    4.32    0.59
  11   2   2    4.17    0.70
  12  -2   2    2.44    0.33
  12  -3  -2    4.54    0.51
  12  -3  -2    4.88    0.49
 -12  -3   2    5.04    0.52
  11  -3  -2    2.53    0.53
  11  -3  -2    1.77    0.33
 -11  -3   2    2.75    0.56
  11  -3  -2    2.19    0.54
 -11  -3   2    1.71    0.45
 -11  -3   2    1.77    0.47
 -11  -3   2    2.15    0.23
 -11  -3   2    1.58    0.22
  11  -3  -2    0.83    0.54
 -10  -3   2   15.07    0.91
  10  -3  -2   15.16    1.16
 -10  -3   2   12.63    1.11
  10  -3  -2   13.69    1.24
 -10  -3   2   13.82    1.08
  10  -3  -2   15.07    1.17
  10  -3  -2   12.86    1.27
 -10  -3   2   13.97    1.28
 -10   3   2   13.95    1.33
   9  -3  -2    9.24    0.90
   9  -3  -2    7.91    0.85
   9  -3  -2    7.97    0.93
   9  -3  -2    6.74    0.99
  -9  -3   2    6.32    0.86
  -9  -3   2    6.69    0.73
  -9  -3   2    7.94    0.84
  -9   3   2   10.04    1.13
  -8  -3   2    0.09    0.43
  -8  -3   2    0.40    0.41
   8  -3  -2   -0.05    0.43
   8  -3  -2    0.68    0.43
   8  -3  -2   -0.05    0.46
  -8  -3   2    0.57    0.37
   8  -3  -2   -0.20    0.42
  -8   3   2    0.29    0.47
  -7  -3   2    5.93    0.60
   7  -3  -2    5.45    0.73
   7  -3  -2    7.04    0.75
  -7  -3   2    4.81    0.64
  -7   3   2    5.54    0.76
  -6  -3   2    5.68    0.64
   6  -3  -2    6.76    0.67
  -6  -3   2    6.80    0.61
  -6   3   2    5.73    0.70
   5  -3  -2    0.02    0.54
   5  -3  -2    0.61    0.27
  -5  -3   2    0.40    0.23
   4  -3  -2  113.56    5.64
   4  -3  -2  113.23    6.18
   4  -3  -2  110.38    7.70
   4   3  -2  109.38    5.72
   3  -3  -2    5.70    0.47
   3  -3  -2    6.12    0.48
   3  -3  -2    5.06    0.80
  -3  -3   2    4.62    0.69
   3   3  -2    6.27    0.75
  -3   3   2    5.27    0.84
   2  -3  -2  132.84    8.79
  -2  -3   2  130.78    8.66
   2  -3  -2  138.27    8.83
  -2   3   2  130.04    8.81
   2   3  -2  130.73    8.62
  -1  -3   2  152.84   10.31
  -1  -3   2  150.77    8.78
   1  -3  -2  174.32   10.57
   1  -3  -2  160.18   10.52
  -1   3   2  155.33   10.52
   1   3  -2  167.99   10.26
   0  -3  -2  133.47    9.20
   0  -3  -2  139.27    6.79
   0  -3   2  133.43    7.67
   0  -3  -2  151.35    9.27
   0   3   2  140.56    9.21
   1  -3   2  157.44   10.32
  -1  -3  -2  152.59   10.54
   1  -3   2  162.73    8.79
  -1  -3  -2  163.32    7.82
  -1  -3  -2  185.80   10.61
   1   3   2  151.21    7.83
  -1   3  -2  156.09   10.26
   1   3   2  156.28   10.52
  -1   3  -2  155.54    7.89
   2  -3   2   54.91    3.99
   2  -3   2   61.12    3.37
  -2  -3  -2   59.70    4.17
  -2  -3  -2   61.48    3.04
  -2  -3  -2   60.66    4.20
   2  -3   2   60.80    3.07
   2   3   2   56.90    3.03
  -2   3  -2   59.08    3.07
   2   3   2   55.69    4.13
   3  -3   2    3.00    0.41
   3  -3   2    2.26    0.52
   3   3   2    2.09    0.57
   3   3   2    1.57    0.34
   4  -3   2   73.84    3.70
   4  -3   2   61.07    4.90
   4   3   2   73.54    3.74
   5  -3   2    0.88    0.27
   5  -3   2    0.06    0.49
  -5  -3  -2    0.55    0.32
   5   3   2    1.26    0.36
   6  -3   2   30.09    1.81
   6  -3   2   29.46    1.55
   6  -3   2   30.63    1.85
  -6  -3  -2   30.08    1.98
   6   3   2   27.61    1.92
   7  -3   2    2.91    0.38
   7  -3   2    1.54    0.47
  -7  -3  -2    2.08    0.58
   7  -3   2    2.91    0.49
   7   3   2    1.94    0.54
   7   3   2    2.78    0.66
  -8  -3  -2   28.43    1.87
  -8  -3  -2   25.98    2.03
   8  -3   2   26.94    1.66
   8  -3   2   28.76    1.84
   8  -3   2   28.04    1.49
  -8  -3  -2   27.60    1.70
   8  -3   2   27.51    1.62
   8   3   2   27.10    1.71
   8   3   2   29.53    2.05
   8   3   2   27.23    1.98
   9  -3   2    0.52    0.52
   9  -3   2    0.78    0.47
   9  -3   2    0.26    0.43
  -9  -3  -2   -0.54    0.44
  -9  -3  -2   -0.55    0.53
   9  -3   2    0.21    0.25
  -9  -3  -2   -0.04    0.40
   9  -3   2    0.09    0.25
   9  -3   2    0.10    0.40
   9   3   2    0.63    0.62
   9   3   2    0.61    0.53
   9   3   2    0.91    0.60
  10  -3   2    1.05    0.42
  10  -3   2    1.07    0.44
  10  -3   2    0.83    0.50
 -10  -3  -2    1.43    0.53
  10  -3   2    1.62    0.48
 -10  -3  -2    1.34    0.46
 -10  -3  -2    1.18    0.55
  10   3   2    0.92    0.63
  10   3   2    1.78    0.61
  10   3   2    1.96    0.54
  11  -3   2    1.45    0.40
  11  -3   2    0.81    0.38
  11  -3   2    2.08    0.41
 -11  -3  -2    0.94    0.37
  11   3   2    1.22    0.43
  11   3   2    0.76    0.49
 -12  -4   2    0.27    0.28
  12  -4  -2   -0.19    0.29
  12  -4  -2   -0.05    0.26
 -11  -4   2    1.81    0.41
  11  -4  -2    1.99    0.49
  11  -4  -2    0.92    0.44
 -11  -4   2    1.23    0.43
  11  -4  -2    0.80    0.51
  10  -4  -2    6.91    0.93
 -10  -4   2    5.75    0.69
  10  -4  -2    8.64    0.84
  10  -4  -2    5.52    0.58
 -10  -4   2    8.03    0.55
 -10  -4   2    7.82    0.88
  10  -4  -2    5.83    0.75
 -10  -4   2    6.41    0.74
  10  -4  -2    6.80    0.85
  -9  -4   2    9.92    0.91
   9  -4  -2   11.32    1.10
  -9  -4   2    9.89    0.87
  -9  -4   2   11.88    1.10
   9  -4  -2    9.03    1.06
   9  -4  -2    9.25    0.89
  -9  -4   2    8.55    0.69
   9  -4  -2    8.25    0.84
   8  -4  -2    2.90    0.61
  -8  -4   2    3.16    0.56
  -8  -4   2    3.49    0.42
   8  -4  -2    4.32    0.73
   8  -4  -2    4.24    0.61
  -8  -4   2    4.77    0.72
  -8  -4   2    3.50    0.51
   8  -4  -2    3.31    0.57
   7  -4  -2    5.00    0.64
  -7  -4   2    6.48    0.64
  -7  -4   2    5.02    0.47
   7  -4  -2    4.51    0.67
  -7  -4   2    5.67    0.70
  -7   4   2    5.55    0.60
  -6  -4   2   21.09    1.19
  -6  -4   2   23.88    1.50
  -6  -4   2   23.36    1.37
   6  -4  -2   22.63    1.51
   6  -4  -2   22.07    1.48
  -5  -4   2   13.56    0.95
   5  -4  -2   13.51    0.98
   5  -4  -2   14.64    1.64
   4  -4  -2   95.71    4.71
   4  -4  -2   92.48    5.18
   4  -4  -2   84.72    6.46
   4   4  -2   96.83    4.84
   3  -4  -2   14.75    1.49
   3  -4  -2   17.19    0.97
   3  -4  -2   16.75    1.07
   2  -4  -2  163.05   10.86
  -2  -4   2  166.82   10.68
   2  -4  -2  158.44   10.85
   2  -4  -2  168.76    8.01
   2  -4  -2  164.77    9.01
  -2   4   2  163.76   10.88
   2   4  -2  161.49   10.62
  -1  -4   2   45.49    2.77
   1  -4  -2   51.89    3.48
  -1  -4   2   49.72    3.19
   1  -4  -2   44.50    3.42
  -1   4   2   50.25    3.46
   0  -4  -2   32.15    1.60
   0  -4  -2   28.75    2.40
   0  -4  -2   33.37    2.46
   0  -4   2   32.29    1.92
   0   4   2   34.54    2.43
  -1  -4  -2  120.60    7.44
   1  -4   2  106.21    6.09
  -1  -4  -2  101.26    7.38
  -1  -4  -2  106.92    5.38
   1  -4   2  114.42    7.12
  -1   4  -2  110.29    5.49
   1   4   2  105.42    7.34
   1   4   2  110.77    5.42
   2  -4   2   19.31    1.26
  -2  -4  -2   21.45    1.73
   2  -4   2   20.11    1.18
  -2  -4  -2   19.17    1.12
  -2  -4  -2   19.36    1.71
   2  -4   2   18.47    1.47
   2   4   2   20.26    1.66
   2   4   2   18.47    1.13
  -2   4  -2   17.99    1.16
   3  -4   2   28.04    1.65
   3  -4   2   25.43    2.03
  -3  -4  -2   24.78    1.54
   3  -4   2   27.15    1.56
   3   4   2   26.15    1.55
   4  -4   2    0.49    0.32
   4  -4   2    0.58    0.45
   4   4   2    0.35    0.34
  -5  -4  -2   48.02    2.85
   5  -4   2   50.34    2.72
   5   4   2   43.45    2.83
   6  -4   2    4.65    0.54
  -6  -4  -2    4.20    0.64
   6  -4   2    4.15    0.38
   6  -4   2    4.91    0.56
   6   4   2    4.25    0.63
   6   4   2    5.09    0.73
   7  -4   2    6.28    0.60
   7  -4   2    7.31    0.71
  -7  -4  -2    6.68    0.89
   7  -4   2    7.72    0.76
   7  -4   2    7.33    0.53
  -7  -4  -2    6.23    0.72
   7   4   2    9.96    1.07
   7   4   2    5.69    0.81
   8  -4   2   46.97    2.86
   8  -4   2   50.46    2.33
   8  -4   2   42.59    2.59
  -8  -4  -2   48.28    2.68
  -8  -4  -2   47.65    2.84
   8  -4   2   47.63    2.52
   8  -4   2   51.64    2.83
   8  -4   2   48.75    2.33
  -8  -4  -2   48.90    3.09
   8   4   2   47.42    3.00
   8   4   2   42.63    2.59
   8   4   2   50.24    3.10
  -9  -4  -2    3.15    0.73
   9  -4   2    3.30    0.55
   9  -4   2    4.18    0.60
  -9  -4  -2    4.10    0.61
   9  -4   2    2.22    0.59
   9  -4   2    2.15    0.50
  -9  -4  -2    2.94    0.61
   9   4   2    3.60    0.82
   9   4   2    3.01    0.75
   9   4   2    3.37    0.66
 -10  -4  -2    1.09    0.53
  10  -4   2    1.50    0.45
  10  -4   2    1.41    0.36
 -10  -4  -2    2.40    0.51
  10  -4   2    1.50    0.47
  10  -4   2    1.59    0.45
 -10  -4  -2    0.82    0.46
  10   4   2    1.85    0.66
  10   4   2    1.96    0.61
  10   4   2    1.94    0.55
  11  -4   2    6.93    0.60
  11  -4   2    7.79    0.63
 -11  -4  -2    6.83    0.65
  11   4   2    6.74    0.67
  11   4   2    4.27    0.72
 -12  -5   2    2.98    0.38
  12  -5  -2    3.12    0.40
  12  -5  -2    3.78    0.40
 -11  -5   2   14.90    0.98
  11  -5  -2   14.18    1.16
 -11  -5   2   15.24    1.05
  11  -5  -2   15.94    1.09
  11  -5  -2   15.10    1.03
  10  -5  -2    7.12    0.74
 -10  -5   2    6.98    0.79
  10  -5  -2    4.54    0.76
  10  -5  -2    6.39    0.51
  10  -5  -2    6.69    0.77
  10  -5  -2    5.83    0.70
 -10  -5   2    7.37    0.74
 -10  -5   2    6.95    0.70
  -9  -5   2    5.00    0.66
  -9  -5   2    5.06    0.44
  -9  -5   2    4.13    0.62
   9  -5  -2    4.93    0.55
   9  -5  -2    3.97    0.63
   9  -5  -2    5.57    0.70
   9  -5  -2    5.27    0.87
   9  -5  -2    5.09    0.77
  -9  -5   2    5.91    0.79
  -9  -5   2    5.30    0.43
   8  -5  -2    1.22    0.58
   8  -5  -2    0.98    0.46
   8  -5  -2    1.17    0.52
  -8  -5   2    1.34    0.44
  -8  -5   2    1.53    0.41
  -8  -5   2    0.94    0.28
   8  -5  -2    1.38    0.46
  -8  -5   2    0.98    0.48
  -7  -5   2    2.46    0.33
   7  -5  -2    2.10    0.49
  -7  -5   2    2.12    0.42
  -7  -5   2    2.80    0.55
   7  -5  -2    2.57    0.58
  -7   5   2    3.24    0.48
  -6  -5   2   28.57    1.44
   6  -5  -2   27.88    1.81
  -6  -5   2   28.66    1.80
  -6  -5   2   27.80    1.66
   6  -5  -2   29.47    1.80
   5  -5  -2   34.97    3.01
  -5  -5   2   35.04    2.08
   5  -5  -2   35.48    2.11
   4  -5  -2   72.68    4.09
   4  -5  -2   70.68    5.19
   4   5  -2   70.77    3.83
   3  -5  -2    5.14    0.88
   3  -5  -2    7.13    0.61
  -2  -5   2   14.08    1.18
  -2  -5   2   14.15    0.99
   2  -5  -2   14.05    1.36
   2  -5  -2   15.04    0.79
   2  -5  -2   15.27    1.00
   1  -5  -2   98.44    7.05
   1  -5  -2  107.59    7.08
  -1  -5   2  101.40    5.82
  -1  -5   2  112.16    6.80
   1  -5  -2  103.81    5.81
  -1   5   2  101.31    7.05
   0  -5  -2   69.48    4.98
   0  -5   2   68.96    4.06
   0  -5   2   75.23    4.64
   0  -5  -2   66.38    4.02
   0  -5   2   76.49    4.63
   0  -5  -2   78.81    5.03
   0   5  -2   67.46    3.66
   0   5   2   68.03    4.93
  -1  -5  -2   21.82    1.99
   1  -5   2   25.97    1.71
   1  -5   2   24.89    1.55
  -1  -5  -2   22.77    1.48
   1   5   2   23.69    1.95
   1   5   2   24.94    1.32
  -1   5  -2   24.76    1.41
   2  -5   2  185.90   12.11
  -2  -5  -2  183.31   10.20
  -2  -5  -2  191.25   12.41
   2  -5   2  178.99   10.26
   2   5   2  191.04    9.16
   3  -5   2    1.96    0.39
   3  -5   2    1.56    0.47
   3  -5   2    2.11    0.40
   3   5   2    2.91    0.45
  -4  -5  -2   13.96    1.07
   4  -5   2   14.89    0.97
   4  -5   2   16.47    1.52
   4  -5   2   19.58    1.18
   5  -5   2    8.86    0.46
   5  -5   2    8.06    0.46
  -5  -5  -2    7.77    0.80
   5  -5   2    7.52    0.65
   6  -5   2   59.38    2.67
  -6  -5  -2   52.85    3.37
   6  -5   2   59.06    2.67
   6  -5   2   55.60    3.11
   6  -5   2   52.62    3.20
  -7  -5  -2   48.92    3.08
  -7  -5  -2   49.34    2.85
   7  -5   2   51.36    2.87
   7  -5   2   46.97    2.51
   7  -5   2   46.03    2.94
   7  -5   2   45.27    2.61
   7  -5   2   53.55    2.30
  -7  -5  -2   46.44    2.70
   7  -5   2   49.88    2.81
   8  -5   2   10.78    0.88
  -8  -5  -2    8.54    1.05
   8  -5   2   12.76    1.04
  -8  -5  -2   11.69    0.97
   8  -5   2   11.99    0.95
  -8  -5  -2   11.94    1.05
   8  -5   2   10.55    0.92
   8   5   2    9.95    1.13
   9  -5   2   23.64    1.56
   9  -5   2   23.29    1.39
  -9  -5  -2   21.86    1.76
   9  -5   2   24.38    1.52
   9  -5   2   21.65    1.44
  -9  -5  -2   22.08    1.57
  -9  -5  -2   23.09    1.52
   9   5   2   24.05    1.85
   9   5   2   24.25    1.82
 -10  -5  -2    2.22    0.49
  10  -5   2    2.08    0.46
  10  -5   2    1.90    0.44
 -10  -5  -2    1.40    0.33
  10  -5   2    1.38    0.42
 -10  -5  -2    1.96    0.49
  10   5   2    1.46    0.64
  10   5   2    1.36    0.55
  11  -5   2    1.59    0.35
  11  -5   2    1.98    0.36
 -11  -5  -2    1.84    0.41
  11  -6  -2    9.49    0.75
 -11  -6   2    8.89    0.74
  11  -6  -2    8.79    0.78
  11  -6  -2    8.27    0.79
  10  -6  -2    8.85    0.84
 -10  -6   2   10.36    0.77
 -10  -6   2    7.43    0.77
  10  -6  -2    9.51    0.89
  10  -6  -2    8.89    0.79
  10  -6  -2    9.65    0.95
   9  -6  -2   23.00    1.72
  -9  -6   2   23.90    1.54
  -9  -6   2   25.73    1.55
   9  -6  -2   23.48    1.30
   9  -6  -2   22.72    1.68
   9  -6  -2   24.26    1.54
  -9  -6   2   24.97    1.67
   9  -6  -2   25.54    1.79
   9  -6  -2   25.09    1.59
   8  -6  -2   28.61    1.64
  -8  -6   2   30.99    1.50
   8  -6  -2   28.90    1.84
   8  -6  -2   31.49    1.79
  -8  -6   2   32.73    2.02
   8  -6  -2   34.86    2.08
   8  -6  -2   28.52    2.03
   8  -6  -2   28.10    2.00
  -8  -6   2   29.33    1.81
  -8  -6   2   32.02    1.51
  -8  -6   2   31.21    1.85
   7  -6  -2   22.61    1.31
  -7  -6   2   25.35    1.19
  -7  -6   2   24.47    1.18
   7  -6  -2   22.20    1.40
  -7  -6   2   23.39    1.57
   7  -6  -2   24.69    1.60
   7  -6  -2   19.22    1.41
  -7  -6   2   21.97    1.44
  -7  -6   2   23.18    1.39
   7  -6  -2   24.23    1.64
   7  -6  -2   21.17    1.41
  -6  -6   2   87.75    4.26
   6  -6  -2   94.64    4.95
   6  -6  -2   89.26    5.10
  -6  -6   2   94.08    4.79
  -6  -6   2   94.85    5.09
   6  -6  -2   85.05    4.37
  -6  -6   2   90.60    4.27
  -5  -6   2    1.39    0.15
  -5  -6   2    1.89    0.32
  -5  -6   2    1.35    0.15
   5  -6  -2    1.42    0.34
  -5  -6   2    1.63    0.26
  -4  -6   2   30.88    1.80
   4  -6  -2   35.16    1.98
   4  -6  -2   28.07    2.62
   4  -6  -2   30.33    1.86
   3  -6  -2  112.15    8.23
   3  -6  -2  127.08    6.75
  -2  -6   2  100.29    5.72
   2  -6  -2  102.63    5.73
   2  -6  -2  103.35    7.01
  -1  -6   2    3.72    0.43
   1  -6  -2    3.21    0.41
  -1  -6   2    2.77    0.42
   1  -6  -2    1.99    0.56
   0  -6   2  141.87    8.65
   0  -6   2  142.90    8.64
   0  -6  -2  123.52    7.41
   0  -6  -2  130.71    8.99
   0  -6   2  131.66    7.46
   0   6  -2  129.61    6.66
   1  -6   2   12.79    0.97
   1  -6   2   14.08    1.02
  -1  -6  -2   11.94    1.31
  -1  -6  -2   12.05    0.90
   2  -6   2   11.63    0.96
  -2  -6  -2    7.21    1.13
   2  -6   2    9.78    0.84
  -2  -6  -2   10.60    0.77
  -3  -6  -2   13.15    1.43
   3  -6   2   11.63    1.15
   3  -6   2   12.17    0.97
   4  -6   2   50.93    3.01
   4  -6   2   60.74    3.29
  -5  -6  -2    1.10    0.36
   5  -6   2    1.35    0.26
  -6  -6  -2    0.24    0.33
   6  -6   2    0.35    0.26
  -6  -6  -2    0.31    0.38
   6  -6   2   -0.14    0.27
  -7  -6  -2   35.00    2.33
   7  -6   2   34.05    2.09
  -7  -6  -2   31.87    2.03
   7  -6   2   35.52    1.87
   7  -6   2   36.78    2.09
   7  -6   2   35.85    2.24
   7  -6   2   35.39    1.96
  -7  -6  -2   35.51    2.15
  -8  -6  -2    2.34    0.53
   8  -6   2    1.81    0.48
   8  -6   2    1.45    0.40
   8  -6   2    1.27    0.39
  -8  -6  -2    1.59    0.53
   8  -6   2    1.74    0.44
  -9  -6  -2    4.94    0.68
  -9  -6  -2    7.55    0.61
   9  -6   2    8.04    0.68
   9  -6   2    7.32    0.72
  -9  -6  -2    5.60    0.72
   9  -6   2    6.48    0.65
 -10  -6  -2    4.80    0.60
 -10  -6  -2    3.78    0.55
  10  -6   2    3.58    0.46
 -10  -6  -2    3.71    0.34
 -10  -6  -2    3.53    0.34
  10  -6   2    4.08    0.49
 -11  -6  -2    8.90    0.74
  11  -6   2    9.79    0.65
  11  -6   2   10.11    0.68
  11  -7  -2   -0.11    0.32
  11  -7  -2   -0.27    0.32
 -11  -7   2   -0.19    0.28
  10  -7  -2    8.19    0.77
 -10  -7   2    9.18    0.79
  10  -7  -2    8.82    0.86
  10  -7  -2    8.39    0.77
  10  -7  -2   10.48    0.82
   9  -7  -2   16.17    1.18
   9  -7  -2   14.57    1.28
   9  -7  -2   15.46    1.28
   9  -7  -2   15.35    1.19
  -9  -7   2   15.55    1.12
  -9  -7   2   14.35    1.01
   9  -7  -2   14.28    1.11
   8  -7  -2   83.91    3.83
   8  -7  -2   77.58    4.22
   8  -7  -2   77.20    4.65
   8  -7  -2   82.08    4.06
  -8  -7   2   81.02    4.30
   8  -7  -2   86.36    4.55
   8  -7  -2   77.70    3.84
   8  -7  -2   78.12    4.61
  -8  -7   2   81.79    4.21
   7  -7  -2    1.32    0.56
  -7  -7   2    1.88    0.40
   7  -7  -2    0.97    0.40
   7  -7  -2    1.16    0.40
   7  -7  -2    1.64    0.53
  -7  -7   2    1.34    0.40
   7  -7  -2    0.60    0.41
   7  -7  -2    1.05    0.29
  -7  -7   2    1.09    0.34
   7  -7  -2    2.37    0.51
   6  -7  -2   22.00    1.24
  -6  -7   2   22.23    1.46
   6  -7  -2   23.44    1.56
   6  -7  -2   25.21    1.55
  -6  -7   2   22.40    1.35
   5  -7  -2   72.29    4.16
  -5  -7   2   77.38    3.88
   5  -7  -2   76.26    4.05
   5  -7  -2   69.71    3.55
   4  -7  -2    0.92    0.28
   4  -7  -2    0.23    0.32
   3  -7  -2   34.38    2.03
   3  -7  -2   31.36    1.87
   3  -7  -2   30.03    2.62
  -2  -7   2   69.29    4.03
   2  -7  -2   72.47    4.05
   2  -7  -2   67.83    5.00
   1  -7  -2   35.23    2.90
  -1  -7   2   37.23    2.30
   1  -7  -2   40.15    2.30
   0  -7   2  172.12    9.92
   0  -7  -2  173.91    9.89
   0  -7  -2  169.40   11.90
   0  -7   2  190.86   11.55
   0  -7   2  184.96   11.53
   1  -7   2   71.71    4.47
   1  -7   2   69.04    3.90
  -1  -7  -2   61.43    3.83
  -1  -7  -2   64.38    4.80
   2  -7   2   18.96    1.29
   2  -7   2   16.67    1.39
  -2  -7  -2   16.94    1.69
  -2  -7  -2   17.08    1.19
  -3  -7  -2   43.97    3.52
   3  -7   2   44.23    3.25
   3  -7   2   45.69    2.75
   4  -7   2   28.38    1.89
   5  -7   2    7.35    0.62
  -5  -7  -2    7.17    0.57
   6  -7   2    2.32    0.56
   6  -7   2    3.49    0.45
  -6  -7  -2    1.97    0.35
  -6  -7  -2    2.47    0.48
  -7  -7  -2    2.70    0.52
  -7  -7  -2    2.76    0.55
   7  -7   2    2.73    0.45
  -7  -7  -2    1.43    0.34
   7  -7   2    2.45    0.41
   7  -7   2    2.20    0.39
   7  -7   2    1.88    0.59
   8  -7   2    0.17    0.36
  -8  -7  -2    0.13    0.41
   8  -7   2   -0.18    0.35
  -8  -7  -2    0.10    0.28
  -8  -7  -2    0.45    0.46
   8  -7   2   -0.42    0.30
  -9  -7  -2    0.65    0.46
   9  -7   2    0.31    0.36
   9  -7   2    0.08    0.33
  -9  -7  -2    0.33    0.41
  -9  -7  -2    0.28    0.24
  10  -7   2   39.52    2.06
 -10  -7  -2   40.18    2.18
  10  -7   2   39.23    1.98
 -10  -7  -2   34.95    2.17
  11  -7   2    0.65    0.22
 -11  -7  -2    0.38    0.29
 -11  -8   2    2.99    0.37
  11  -8  -2    3.22    0.39
  11  -8  -2    3.19    0.39
  10  -8  -2    2.96    0.49
  10  -8  -2    2.87    0.49
 -10  -8   2    2.69    0.44
  10  -8  -2    2.45    0.48
   9  -8  -2    1.29    0.51
  -9  -8   2    0.84    0.41
   9  -8  -2    1.05    0.58
   9  -8  -2    0.69    0.46
   9  -8  -2    1.28    0.48
   9  -8  -2    0.58    0.36
   8  -8  -2   15.24    1.24
   8  -8  -2   14.26    1.07
   8  -8  -2   14.19    1.33
  -8  -8   2   13.51    0.92
   8  -8  -2   15.67    1.14
   8  -8  -2   14.91    1.14
  -8  -8   2   15.01    1.07
   7  -8  -2   20.56    1.60
   7  -8  -2   20.12    1.37
   7  -8  -2   23.03    1.08
  -7  -8   2   21.69    1.36
   7  -8  -2   21.67    1.56
   7  -8  -2   23.15    1.50
  -7  -8   2   21.78    1.28
   7  -8  -2   21.89    1.08
   7  -8  -2   20.58    1.39
   7  -8  -2   22.71    1.37
   6  -8  -2    0.34    0.31
   6  -8  -2    0.28    0.38
   6  -8  -2   -0.07    0.15
   6  -8  -2    0.50    0.36
   6  -8  -2   -0.28    0.17
  -6  -8   2    0.53    0.22
   6  -8  -2    0.01    0.44
  -5  -8   2    3.09    0.29
   5  -8  -2    3.40    0.49
   5  -8  -2    3.03    0.45
   5  -8  -2    3.41    0.29
   5  -8  -2    3.18    0.31
   4  -8  -2   15.62    0.82
   4  -8  -2   16.79    1.22
   4  -8  -2   14.81    1.06
   4  -8  -2   14.37    1.03
   4  -8  -2   15.23    0.80
   3  -8  -2   19.53    1.26
   3  -8  -2   22.56    1.46
  -3  -8   2   20.22    1.09
   2  -8  -2    2.80    0.72
   2  -8  -2    3.90    0.40
  -2  -8   2    3.42    0.52
   2  -8  -2    3.28    0.52
   1  -8  -2   43.27    3.37
   1  -8  -2   44.64    2.69
  -1  -8   2   45.06    2.71
   0  -8  -2    1.78    0.58
   0  -8  -2    2.02    0.42
   0  -8   2    1.25    0.40
   0  -8   2    1.80    0.31
  -1  -8  -2  125.62    7.26
   1  -8   2  128.59    7.31
   1  -8   2  136.34    8.48
  -1  -8  -2  126.21    8.84
  -2  -8  -2   56.58    3.38
  -2  -8  -2   53.31    4.28
   2  -8   2   60.04    3.46
   2  -8   2   58.84    3.96
  -3  -8  -2   29.26    1.52
   3  -8   2   31.42    1.64
   3  -8   2   31.93    2.04
   4  -8   2    0.75    0.39
  -4  -8  -2    0.68    0.32
  -4  -8  -2    0.41    0.20
  -5  -8  -2    0.90    0.25
  -6  -8  -2    9.54    0.82
  -6  -8  -2    8.51    0.77
   6  -8   2    7.43    0.62
   6  -8   2    7.53    0.66
  -6  -8  -2    7.74    0.59
   6  -8   2    6.29    0.78
   7  -8   2    0.31    0.29
  -7  -8  -2    0.26    0.38
   7  -8   2    0.00    0.52
  -7  -8  -2    0.25    0.43
   7  -8   2    0.08    0.31
  -7  -8  -2    0.21    0.25
  -8  -8  -2   26.64    1.70
   8  -8   2   27.04    1.57
  -8  -8  -2   28.74    1.38
  -8  -8  -2   25.35    1.70
   8  -8   2   27.07    1.48
  -8  -8  -2   26.43    1.37
   9  -8   2    0.61    0.30
  -9  -8  -2    0.79    0.45
   9  -8   2    0.75    0.34
  -9  -8  -2    0.44    0.36
  10  -8   2   -0.18    0.26
 -10  -8  -2    0.47    0.36
  10  -8   2    0.27    0.26
 -11  -8  -2    8.13    0.60
 -11  -9   2    0.69    0.21
  11  -9  -2    0.43    0.24
 -10  -9   2    7.27    0.62
  10  -9  -2    7.95    0.65
  10  -9  -2    6.58    0.62
   9  -9  -2   13.31    1.06
   9  -9  -2   15.16    1.08
   9  -9  -2   13.52    1.22
  -9  -9   2   15.18    1.02
   9  -9  -2   14.44    1.00
   8  -9  -2    2.92    0.56
   8  -9  -2    2.84    0.46
   8  -9  -2    2.81    0.51
   8  -9  -2    2.24    0.51
  -8  -9   2    2.83    0.49
   8  -9  -2    3.38    0.75
   7  -9  -2   16.66    1.20
  -7  -9   2   18.02    1.12
   7  -9  -2   14.86    1.41
   7  -9  -2   17.16    1.14
   7  -9  -2   17.52    1.28
   7  -9  -2   16.07    1.18
   6  -9  -2    0.33    0.40
   6  -9  -2    1.42    0.39
   6  -9  -2    0.53    0.50
  -6  -9   2    1.40    0.34
   6  -9  -2    0.89    0.35
   5  -9  -2    6.77    0.70
   5  -9  -2    8.25    0.72
   4  -9  -2   13.10    0.94
   4  -9  -2   13.41    1.14
   4  -9  -2   13.35    0.97
   3  -9  -2    3.88    0.41
   3  -9  -2    4.78    0.66
  -3  -9   2    3.57    0.38
  -2  -9   2   46.04    2.80
   2  -9  -2   43.98    2.55
  -2  -9   2   46.08    2.22
   1  -9  -2    6.83    0.79
  -1  -9   2    8.31    0.86
  -1  -9   2    8.44    0.47
   0  -9   2    1.57    0.32
   0  -9   2    1.08    0.14
   0  -9   2    1.07    0.42
   0  -9  -2    1.16    0.40
   1  -9   2   35.71    2.24
  -1  -9  -2   33.94    2.18
  -1  -9  -2   34.11    1.61
  -2  -9  -2    2.65    0.21
  -2  -9  -2    2.44    0.50
  -2  -9  -2    2.45    0.20
   2  -9   2    2.86    0.55
   2  -9   2    2.63    0.26
  -3  -9  -2   23.86    1.11
   3  -9   2   21.02    1.61
  -3  -9  -2   22.13    1.11
   3  -9   2   22.71    1.24
  -3  -9  -2   20.85    1.36
   3  -9   2   20.83    1.72
   4  -9   2    4.07    0.73
   4  -9   2    4.52    0.43
  -4  -9  -2    3.33    0.31
   4  -9   2    3.72    0.66
  -4  -9  -2    3.60    0.30
  -5  -9  -2    3.86    0.52
  -5  -9  -2    3.34    0.32
  -5  -9  -2    4.14    0.54
   5  -9   2    4.09    0.62
  -5  -9  -2    3.86    0.33
   6  -9   2   14.92    0.99
  -6  -9  -2   15.86    1.15
  -6  -9  -2   15.98    1.14
  -6  -9  -2   17.15    0.86
   6  -9   2   15.47    1.29
  -6  -9  -2   15.41    0.86
  -7  -9  -2    3.76    0.53
   7  -9   2    4.16    0.70
  -7  -9  -2    3.76    0.58
  -7  -9  -2    2.47    0.14
   7  -9   2    4.32    0.45
   8  -9   2    2.05    0.39
  -8  -9  -2    3.18    0.50
  -8  -9  -2    3.22    0.58
  -9  -9  -2    0.67    0.44
   9  -9   2    0.95    0.30
  -9  -9  -2    1.82    0.35
 -10  -9  -2    3.05    0.43
  10  -9   2    2.20    0.28
  10 -10  -2   11.15    0.77
 -10 -10   2   10.13    0.72
  10 -10  -2   11.91    0.73
  -9 -10   2    4.90    0.52
   9 -10  -2    4.71    0.56
   9 -10  -2    5.46    0.75
   9 -10  -2    5.47    0.54
   8 -10  -2    1.60    0.43
   8 -10  -2    1.65    0.46
   8 -10  -2    1.75    0.66
   8 -10  -2    1.43    0.42
  -8 -10   2    1.34    0.38
   7 -10  -2   13.34    1.04
   7 -10  -2   13.22    1.28
   7 -10  -2   15.31    0.98
  -7 -10   2   14.30    0.97
   7 -10  -2   12.79    1.07
   6 -10  -2   45.57    2.81
   6 -10  -2   47.85    2.64
   6 -10  -2   46.00    2.47
  -6 -10   2   43.53    2.42
   5 -10  -2    0.10    0.39
  -5 -10   2    0.51    0.25
   5 -10  -2    1.00    0.30
   5 -10  -2    0.68    0.47
   5 -10  -2    0.21    0.35
   5 -10  -2    0.15    0.28
   4 -10  -2   16.75    1.05
   4 -10  -2   16.29    1.33
   4 -10  -2   14.75    1.08
   3 -10  -2    1.01    0.45
   3 -10  -2    1.69    0.28
  -3 -10   2    1.28    0.29
   3 -10  -2    1.52    0.33
   2 -10  -2    0.83    0.23
   2 -10  -2    1.31    0.28
   2 -10  -2    0.86    0.43
  -2 -10   2    1.01    0.22
  -2 -10   2    0.00    0.39
  -2 -10   2    0.72    0.42
  -1 -10   2   29.19    1.97
   1 -10  -2   24.41    1.83
   1 -10  -2   25.47    1.58
  -1 -10   2   28.08    1.88
  -1 -10   2   28.75    1.37
   0 -10   2   48.34    2.29
   0 -10   2   47.22    2.96
   0 -10  -2   43.29    2.92
   0 -10   2   50.04    3.10
   1 -10   2  133.31    7.72
  -1 -10  -2  127.79    7.66
   1 -10   2  137.15    8.11
   1 -10   2  142.03    6.41
  -2 -10  -2   78.66    4.79
   2 -10   2   83.21    4.87
   2 -10   2   86.11    4.19
  -2 -10  -2   79.53    4.36
   2 -10   2   83.28    3.95
   2 -10   2   80.99    5.08
   3 -10   2   30.92    2.35
   3 -10   2   33.42    2.29
   3 -10   2   35.92    1.84
  -3 -10  -2   34.95    1.97
   3 -10   2   33.25    1.75
   4 -10   2   16.33    1.23
   4 -10   2   19.89    1.56
   5 -10   2    3.03    0.60
  -5 -10  -2    3.82    0.53
  -5 -10  -2    4.27    0.51
  -6 -10  -2    4.01    0.58
  -6 -10  -2    4.52    0.54
   6 -10   2    5.31    0.76
  -7 -10  -2    8.51    0.72
   7 -10   2    8.32    0.65
   7 -10   2    8.11    0.93
  -7 -10  -2    6.79    0.76
  -8 -10  -2   17.09    1.19
   8 -10   2   16.14    0.98
  -8 -10  -2   16.51    1.03
  -9 -10  -2   12.55    0.93
 -10 -10  -2    0.67    0.26
  10 -11  -2    3.99    0.36
  -9 -11   2    5.64    0.46
   9 -11  -2    4.66    0.45
   9 -11  -2    5.28    0.50
   9 -11  -2    4.31    0.66
   8 -11  -2   18.87    1.19
  -8 -11   2   17.83    1.11
   8 -11  -2   18.56    1.10
   8 -11  -2   18.42    1.47
  -7 -11   2   15.34    0.99
   7 -11  -2   15.45    1.08
   7 -11  -2   15.03    0.98
   7 -11  -2   13.91    1.37
   6 -11  -2    4.56    0.54
   6 -11  -2    5.67    0.58
   6 -11  -2    6.79    0.86
   6 -11  -2    4.86    0.73
  -6 -11   2    5.63    0.51
   5 -11  -2   24.83    1.91
   5 -11  -2   28.51    1.67
   5 -11  -2   27.89    1.86
   5 -11  -2   29.90    1.60
   4 -11  -2    0.79    0.32
   4 -11  -2    1.61    0.33
   4 -11  -2    0.57    0.44
   4 -11  -2    0.87    0.43
   3 -11  -2    0.10    0.25
  -3 -11   2   -0.13    0.24
  -2 -11   2    1.13    0.50
   2 -11  -2    0.54    0.43
  -2 -11   2    1.04    0.24
  -1 -11   2  160.79    9.40
  -1 -11   2  166.40    7.85
   1 -11  -2  155.09    9.38
  -1 -11   2  182.20    9.89
   0 -11   2   11.98    0.69
   0 -11  -2   11.26    0.81
   0 -11   2   12.84    1.25
   0 -11  -2   11.33    1.09
   0 -11   2   11.68    1.18
  -1 -11  -2   11.20    0.83
   1 -11   2   11.94    1.20
  -1 -11  -2   11.36    1.08
   1 -11   2   12.32    0.71
   1 -11   2   12.33    1.23
  -2 -11  -2  134.37    7.05
   2 -11   2  141.34    6.85
   2 -11   2  132.76    6.44
   2 -11   2  131.96    7.78
   2 -11   2  135.24    8.14
   3 -11   2   33.74    1.75
   3 -11   2   34.15    1.81
   3 -11   2   32.04    2.39
   3 -11   2   31.99    1.91
   3 -11   2   33.52    2.22
  -4 -11  -2   38.58    1.96
   4 -11   2   35.06    2.20
  -4 -11  -2   36.71    1.98
   4 -11   2   34.15    2.49
   4 -11   2   32.67    2.34
   4 -11   2   34.07    2.04
  -5 -11  -2   12.95    0.92
   5 -11   2   10.55    1.06
   5 -11   2   12.00    1.10
  -5 -11  -2   11.69    0.82
  -6 -11  -2    1.50    0.31
   6 -11   2    1.02    0.57
  -6 -11  -2    1.73    0.45
   7 -11   2    0.48    0.57
  -7 -11  -2    0.85    0.43
  -8 -11  -2    2.01    0.46
  -9 -11  -2   10.37    0.76
   9 -12  -2   10.98    0.95
   9 -12  -2   11.63    0.72
   8 -12  -2    3.42    0.43
   8 -12  -2    2.36    0.36
   8 -12  -2    2.62    0.63
   7 -12  -2   14.63    0.92
   7 -12  -2   15.20    1.01
   7 -12  -2   15.13    1.34
   6 -12  -2    2.41    0.61
   6 -12  -2    4.07    0.49
   6 -12  -2    3.20    0.72
   6 -12  -2    3.23    0.45
   5 -12  -2    2.24    0.58
   5 -12  -2    3.46    0.66
   5 -12  -2    2.17    0.39
   4 -12  -2    5.81    0.73
   4 -12  -2    6.72    0.59
   4 -12  -2    6.97    0.81
  -3 -12   2   17.61    1.21
  -3 -12   2   16.93    1.00
   3 -12  -2   18.30    1.05
   3 -12  -2   15.85    1.23
   3 -12  -2   17.34    1.37
  -2 -12   2    1.21    0.42
  -2 -12   2    1.30    0.30
   2 -12  -2    1.79    0.50
  -1 -12   2    1.38    0.42
  -1 -12   2    1.55    0.64
  -1 -12   2    1.12    0.26
   0 -12   2    9.81    0.84
   0 -12   2   10.92    1.19
   0 -12   2    9.72    0.63
   1 -12   2   82.94    5.11
   1 -12   2   78.03    4.21
   1 -12   2   76.52    4.53
   1 -12   2   82.96    4.96
   1 -12   2   86.39    3.94
   2 -12   2    4.39    0.61
   2 -12   2    5.14    0.90
   2 -12   2    5.65    0.46
   2 -12   2    5.13    0.49
  -2 -12  -2    4.71    0.46
   2 -12   2    5.44    0.74
   3 -12   2   16.04    1.02
   3 -12   2   17.69    1.05
   3 -12   2   17.01    1.40
  -3 -12  -2   19.79    1.11
   3 -12   2   15.82    1.58
   3 -12   2   17.34    1.22
  -4 -12  -2    2.58    0.42
   4 -12   2    3.12    0.61
   4 -12   2    3.85    0.61
   4 -12   2    3.48    0.79
  -5 -12  -2    7.96    0.70
   5 -12   2    9.23    0.91
   5 -12   2    6.84    0.84
   6 -12   2   35.73    2.21
  -6 -12  -2   33.26    1.94
  -7 -12  -2    8.47    0.74
  -8 -12  -2    1.61    0.37
  -9 -12  -2    8.96    0.63
  -9 -13   2    1.66    0.35
   8 -13  -2    1.94    0.55
   7 -13  -2    1.73    0.33
   7 -13  -2    1.20    0.60
   6 -13  -2    0.00    0.58
   6 -13  -2    0.58    0.33
   6 -13  -2   -0.19    0.47
   5 -13  -2   33.93    2.43
   5 -13  -2   37.41    1.96
   5 -13  -2   37.34    2.33
   4 -13  -2    6.29    0.78
   4 -13  -2    6.96    0.86
  -4 -13   2    5.56    0.69
   4 -13  -2    7.08    0.57
  -3 -13   2    0.22    0.41
   3 -13  -2    0.25    0.43
   3 -13  -2    0.54    0.28
   3 -13  -2    0.46    0.50
   2 -13  -2   54.61    3.33
   2 -13  -2   51.58    2.70
  -2 -13   2   50.54    2.83
  -1 -13   2    1.24    0.42
  -1 -13   2    1.31    0.31
   1 -13  -2    1.31    0.30
   1 -13  -2    2.25    0.57
  -1 -13   2    0.96    0.55
   0 -13   2    1.27    0.29
   0 -13   2    1.21    0.42
   0 -13   2    0.89    0.38
   0 -13  -2    1.14    0.49
   0 -13   2    0.73    0.49
   0 -13  -2    0.91    0.29
   1 -13   2    0.81    0.30
   1 -13   2    0.47    0.66
  -1 -13  -2    1.16    0.29
   1 -13   2    0.97    0.52
   1 -13   2    0.94    0.23
   1 -13   2    1.12    0.43
   2 -13   2    9.49    0.68
  -2 -13  -2   10.07    0.72
   2 -13   2    9.88    1.19
   2 -13   2    8.77    0.84
   2 -13   2   10.63    1.06
   2 -13   2   11.53    0.72
   3 -13   2   33.96    2.46
   3 -13   2   29.85    2.21
   3 -13   2   33.57    1.81
  -3 -13  -2   32.32    1.78
   3 -13   2   33.00    1.90
  -4 -13  -2    2.95    0.42
   4 -13   2    2.99    0.58
   4 -13   2    3.02    0.65
  -5 -13  -2    3.18    0.45
   5 -13   2    3.48    0.63
   5 -13   2    3.12    0.62
  -6 -13  -2   22.20    1.36
   6 -13   2   23.80    1.61
  -7 -13  -2    0.90    0.33
  -8 -13  -2    4.29    0.40
   8 -14  -2   -0.05    0.37
  -8 -14   2    0.08    0.33
   7 -14  -2    6.96    0.77
  -7 -14   2    6.41    0.68
   6 -14  -2   -0.57    0.53
  -6 -14   2    0.14    0.44
   6 -14  -2    0.67    0.49
   5 -14  -2   -0.21    0.53
   5 -14  -2   -0.12    0.51
  -5 -14   2   -0.18    0.43
  -4 -14   2    0.31    0.46
   4 -14  -2   -0.19    0.52
   4 -14  -2   -0.17    0.48
   3 -14  -2   25.02    1.91
  -3 -14   2   27.53    1.65
   2 -14  -2    9.07    0.96
  -2 -14   2    7.19    0.75
  -2 -14   2    7.33    0.57
  -1 -14   2    1.98    0.33
  -1 -14   2    1.35    0.53
   1 -14  -2    1.70    0.56
  -1 -14   2    1.73    0.46
   0 -14   2    6.38    0.51
   0 -14   2    6.75    0.70
   0 -14  -2    5.71    0.78
   0 -14   2    5.42    0.76
   1 -14   2   15.91    1.00
   1 -14   2   17.61    1.48
   1 -14   2   18.78    1.06
   1 -14   2   18.48    1.24
   2 -14   2    0.09    0.20
  -2 -14  -2    0.42    0.27
   2 -14   2    0.19    0.52
   2 -14   2    0.09    0.42
   2 -14   2    0.31    0.28
  -3 -14  -2    0.20    0.25
   3 -14   2   -0.38    0.37
   3 -14   2    0.28    0.52
   3 -14   2    0.13    0.21
   4 -14   2   -0.08    0.48
  -4 -14  -2    0.04    0.25
  -5 -14  -2    8.06    0.62
   5 -14   2    9.28    0.84
   5 -14   2    6.32    0.79
  -6 -14  -2   13.31    0.84
  -7 -14  -2    0.06    0.20
  -7 -15   2    0.34    0.33
   7 -15  -2    0.28    0.41
   6 -15  -2    4.59    0.65
   6 -15  -2    5.56    0.68
  -6 -15   2    4.80    0.58
  -5 -15   2    6.56    0.70
   5 -15  -2    7.92    0.85
   5 -15  -2    6.98    0.78
  -4 -15   2    1.90    0.50
   4 -15  -2    1.58    0.61
   4 -15  -2    2.99    0.59
   3 -15  -2    0.33    0.56
  -3 -15   2    0.32    0.45
  -2 -15   2    5.57    0.66
   2 -15  -2    6.74    0.88
  -1 -15   2    0.40    0.26
  -1 -15   2    0.48    0.50
   1 -15  -2    0.54    0.57
  -1 -15   2    0.25    0.41
   0 -15  -2    7.20    0.88
   0 -15   2    6.76    0.86
   0 -15   2    6.38    0.69
   0 -15   2    6.94    0.54
   0 -15   2    5.88    0.54
   1 -15   2    0.24    0.25
   1 -15   2    0.38    0.22
   1 -15   2    0.26    0.42
   1 -15   2    0.02    0.54
   2 -15   2    6.81    0.86
   2 -15   2    5.89    0.54
   2 -15   2    5.82    0.49
   2 -15   2    6.54    0.68
   3 -15   2   22.89    1.66
   3 -15   2   21.86    1.27
   3 -15   2   21.21    1.36
   4 -15   2   12.28    1.10
   5 -15   2    8.59    0.85
  -6 -15  -2    0.55    0.34
   7 -16  -2   10.46    0.77
  -6 -16   2    9.02    0.74
   6 -16  -2    8.77    0.83
   6 -16  -2   10.30    0.80
  -5 -16   2   -0.33    0.37
   5 -16  -2    0.37    0.42
   5 -16  -2    0.21    0.45
  -4 -16   2    7.13    0.69
   4 -16  -2    6.66    0.83
  -3 -16   2    8.88    0.76
   3 -16  -2    6.70    0.88
   2 -16  -2   16.82    1.37
  -2 -16   2   14.44    1.09
  -1 -16   2    5.04    0.47
  -1 -16   2    6.26    0.66
   1 -16  -2    7.05    0.84
  -1 -16   2    5.34    0.73
   0 -16   2    1.61    0.28
   0 -16   2    1.98    0.47
   0 -16  -2    2.85    0.63
   0 -16   2    1.50    0.57
   0 -16   2    1.91    0.32
   1 -16   2   17.63    1.06
   1 -16   2   19.11    1.25
   1 -16   2   20.02    1.12
   1 -16   2   19.87    1.51
   2 -16   2    1.60    0.58
   2 -16   2    1.68    0.42
   2 -16   2    1.24    0.25
   3 -16   2    2.12    0.56
   4 -16   2   18.74    1.39
   5 -16   2    1.16    0.42
  -5 -17   2   12.24    0.81
   5 -17  -2   11.78    0.97
  -4 -17   2   32.65    1.83
   4 -17  -2   34.06    2.19
   3 -17  -2    0.54    0.50
  -3 -17   2    0.66    0.37
   2 -17  -2    7.12    0.82
  -2 -17   2    6.41    0.62
  -1 -17   2   11.29    0.89
   1 -17  -2   13.02    1.12
  -1 -17   2   12.22    1.04
   0 -17   2    0.41    0.18
   0 -17   2   -0.08    0.46
   0 -17  -2   -0.06    0.46
   0 -17   2    0.17    0.37
   0 -17   2    0.07    0.23
   1 -17   2    1.14    0.52
   1 -17   2    1.03    0.26
   1 -17   2    1.11    0.21
   1 -17   2    1.45    0.39
   2 -17   2    9.38    0.93
   2 -17   2    8.32    0.57
   2 -17   2    8.11    0.69
   3 -17   2    1.30    0.48
   4 -17   2    2.19    0.47
   5 -17   2    1.87    0.38
   4 -18  -2    2.39    0.42
  -4 -18   2    1.46    0.30
   3 -18  -2    9.54    0.85
  -3 -18   2    8.98    0.68
  -2 -18   2    2.38    0.38
   2 -18  -2    2.44    0.52
   1 -18  -2   16.46    1.21
  -1 -18   2   14.63    0.97
  -1 -18   2   15.90    1.13
   0 -18   2    3.47    0.43
   0 -18  -2    4.10    0.55
   0 -18   2    4.79    0.58
   1 -18   2    4.60    0.59
   1 -18   2    3.70    0.41
   2 -18   2    0.27    0.40
   3 -18   2   -0.22    0.33
   4 -18   2    1.32    0.34
   2 -19  -2    2.08    0.37
   1 -19  -2   -0.09    0.27
   0 -19   2    4.35    0.48
   1 -19   2    0.05    0.30
   2 -19   2    7.38    0.63
  12   0  -3    0.37    0.34
 -12   0   3   -0.07    0.29
  11   0  -3    0.16    0.51
 -11   0   3    0.14    0.38
 -11   0   3   -0.09    0.40
 -11   0   3   -0.69    0.43
  11   0  -3    1.17    0.60
  11   0  -3   -0.06    0.45
 -10   0   3   -0.51    0.42
  10   0  -3    0.94    0.60
 -10   0   3    0.22    0.54
  10   0  -3   -0.22    0.49
 -10   0   3   -0.03    0.38
  10   0  -3    1.06    0.65
  -9   0   3   -0.18    0.44
   9   0  -3   -0.21    0.46
   9   0  -3    0.55    0.62
  -9   0   3    0.93    0.59
   9   0  -3   -0.22    0.56
  -9   0   3   -0.11    0.38
  -8   0   3    0.13    0.41
  -8   0   3    0.24    0.35
   8   0  -3    0.27    0.46
   8   0  -3   -0.01    0.47
  -8   0   3   -0.51    0.41
  -8   0   3    0.44    0.43
  -7   0   3   -0.02    0.35
   7   0  -3   -0.19    0.34
   7   0  -3    0.07    0.38
  -7   0   3    0.56    0.36
   6   0  -3    0.18    0.31
  -6   0   3    0.53    0.31
  -5   0   3    0.27    0.50
  -4   0   3   -0.22    0.35
  -3   0   3   -0.10    0.29
  -3   0   3    0.23    0.32
   3   0  -3   -0.18    0.28
  -2   0   3    0.07    0.26
  -2   0   3    0.08    0.25
   2   0  -3    0.12    0.24
  -1   0   3   -0.10    0.12
  -1   0   3    0.09    0.23
   1   0  -3    0.09    0.21
   0   0  -3    0.12    0.21
   0   0   3   -0.01    0.13
   0   0   3   -0.08    0.21
   0   0  -3    0.56    0.25
   1   0   3    0.84    0.32
  -1   0  -3    0.20    0.23
   1   0   3    0.23    0.21
   1   0   3    0.24    0.24
   2   0   3    0.21    0.21
   2   0   3    0.30    0.31
   2   0   3   -0.28    0.25
   3   0   3    0.22    0.36
   3   0   3   -0.01    0.24
   4   0   3   -0.10    0.42
   5   0   3    0.14    0.23
   5   0   3   -0.14    0.57
   6   0   3   -0.02    0.33
   6   0   3   -0.11    0.29
   7   0   3   -0.25    0.31
   7   0   3    0.65    0.40
   7   0   3    0.28    0.43
   8   0   3    0.57    0.41
   8   0   3    0.24    0.47
   8   0   3    0.32    0.53
   8   0   3   -0.04    0.40
   9   0   3    0.05    0.50
   9   0   3    0.46    0.34
   9   0   3   -0.30    0.45
  -9   0  -3    0.01    0.28
   9   0   3   -0.04    0.40
   9   0   3    0.36    0.58
  10   0   3    0.32    0.45
  10   0   3    0.66    0.43
  10   0   3    0.09    0.41
  10   0   3    0.05    0.26
  10   0   3    0.12    0.51
  11   0   3   -0.31    0.37
  11   0   3    0.28    0.39
  11   0   3    0.26    0.36
  12  -1  -3    9.43    0.75
 -12  -1   3    9.61    0.74
 -12   1   3    9.41    0.73
  11  -1  -3    2.20    0.55
 -11  -1   3    2.99    0.55
  11  -1  -3    2.75    0.69
  11  -1  -3    3.25    0.70
 -11  -1   3    3.01    0.53
 -11  -1   3    2.90    0.39
 -11  -1   3    1.76    0.54
 -11   1   3    2.74    0.48
 -11   1   3    3.64    0.69
 -11   1   3    2.90    0.58
  11   1  -3    1.85    0.60
  11   1  -3    2.95    0.73
  10  -1  -3    8.38    1.03
 -10  -1   3    6.40    0.80
 -10  -1   3    6.30    0.89
  10  -1  -3    8.30    1.07
  10  -1  -3    7.63    0.85
 -10  -1   3    3.75    0.62
  10   1  -3    8.65    1.07
 -10   1   3    6.82    0.95
 -10   1   3    6.74    0.73
 -10   1   3    7.97    0.89
  10   1  -3    6.32    0.99
   9  -1  -3    3.85    0.78
  -9  -1   3    3.57    0.62
  -9  -1   3    5.03    0.64
   9  -1  -3    3.87    0.75
   9  -1  -3    4.75    0.70
  -9  -1   3    4.95    0.80
  -9   1   3    3.37    0.72
   9   1  -3    3.33    0.77
  -9   1   3    3.58    0.67
  -9   1   3    4.10    0.57
  -8  -1   3   12.38    0.92
  -8  -1   3   12.92    0.99
   8  -1  -3   13.24    1.20
  -8  -1   3   10.67    0.96
   8  -1  -3   12.25    1.00
  -8  -1   3    8.43    0.99
   8  -1  -3   12.15    1.18
  -8   1   3   10.86    0.99
  -8   1   3   12.13    1.00
  -8   1   3    9.02    1.05
  -7  -1   3    0.33    0.32
  -7  -1   3   -0.07    0.32
   7  -1  -3    0.98    0.46
   7  -1  -3    0.96    0.42
  -7   1   3    0.58    0.38
  -7   1   3    0.25    0.37
  -6  -1   3   29.98    1.91
   6  -1  -3   30.44    1.95
  -6   1   3   30.45    1.95
   4  -1  -3   12.18    1.28
  -4   1   3   11.66    1.27
   3  -1  -3  207.94   14.54
  -3  -1   3  225.15   14.56
  -3   1   3  249.26   14.64
   3   1  -3  208.51   14.49
   2  -1  -3   96.09    7.02
  -2  -1   3  104.90    7.00
  -2   1   3  104.19    7.08
   2   1  -3  105.42    6.97
  -2   1   3  118.84    7.11
  -1  -1   3  457.82   27.98
   1  -1  -3  411.55   28.04
  -1  -1   3  457.08   27.98
   1   1  -3  418.77   27.95
  -1   1   3  419.68   28.07
  -1   1   3  447.81   28.08
   0  -1   3  330.29   22.04
   0  -1  -3  338.17   22.13
   0  -1  -3  332.90   16.71
   0  -1   3  385.64   22.08
   0   1  -3  345.92   22.01
   0   1   3  307.15   22.14
   0   1   3  357.79   22.17
   1  -1   3    0.25    0.23
   1  -1   3    0.18    0.21
   1  -1   3    0.11    0.21
  -1  -1  -3    0.27    0.28
  -1  -1  -3    0.13    0.18
   1   1   3    0.04    0.19
   1   1   3    0.45    0.32
   1   1   3    0.21    0.29
  -1   1  -3    0.51    0.23
   2  -1   3   14.20    1.31
   2  -1   3   15.98    1.02
  -2  -1  -3   15.83    1.39
   2   1   3   17.23    1.41
   2   1   3   15.74    1.40
   2   1   3   15.96    1.01
   3  -1   3    1.25    0.33
   3  -1   3    1.15    0.45
   3   1   3    1.68    0.36
   3   1   3    1.45    0.53
   4  -1   3  112.98    7.97
   4   1   3  118.94    8.07
   5  -1   3    6.93    0.67
   5  -1   3    8.67    1.33
   5   1   3    6.83    0.68
   6  -1   3   19.27    1.33
   6  -1   3   17.89    1.31
   6   1   3   19.25    1.36
   6   1   3   18.80    1.36
   7  -1   3   28.88    1.82
   7  -1   3   28.51    1.85
   7  -1   3   25.50    1.58
   7   1   3   28.96    1.89
   7   1   3   26.47    1.86
   8  -1   3   17.25    1.19
   8  -1   3   16.89    1.18
   8  -1   3   16.52    1.35
   8  -1   3   17.86    1.42
  -8  -1  -3   18.09    1.51
   8  -1   3   14.97    1.05
   8   1   3   16.23    1.40
   8   1   3   18.34    1.23
   8   1   3   16.74    1.23
  -9  -1  -3    1.16    0.61
   9  -1   3    0.91    0.49
  -9  -1  -3    1.38    0.28
   9  -1   3    1.12    0.45
   9  -1   3    2.38    0.58
   9  -1   3    1.65    0.62
   9  -1   3    1.57    0.37
   9   1   3    1.23    0.47
   9   1   3    1.50    0.54
   9   1   3    2.05    0.61
   9   1   3    2.22    0.69
  10  -1   3   12.66    0.96
  10  -1   3   11.09    0.62
  10  -1   3   10.53    0.97
  10  -1   3   11.74    1.09
  10  -1   3   13.21    0.64
  10  -1   3   12.32    0.97
 -10  -1  -3   10.15    1.13
  10   1   3    9.82    0.90
  10   1   3    9.48    1.04
  10   1   3   11.43    0.98
  10   1   3    9.17    0.98
  10   1   3   10.51    0.79
  11  -1   3    0.52    0.37
  11  -1   3    0.50    0.37
  11  -1   3    0.12    0.34
  11   1   3    0.02    0.39
  11   1   3   -0.11    0.36
  11   1   3    0.68    0.40
 -12  -2   3    0.20    0.30
  12  -2  -3    0.42    0.35
  12  -2  -3    0.01    0.33
 -11  -2   3   15.63    1.09
 -11  -2   3   13.47    1.07
 -11  -2   3   15.98    1.22
  11  -2  -3   15.58    1.27
  11  -2  -3   16.11    1.35
  11  -2  -3   17.02    1.14
  11  -2  -3   14.96    1.14
 -11  -2   3   13.88    0.82
 -11   2   3   13.54    1.16
 -11   2   3   12.76    1.26
 -10  -2   3    1.31    0.59
  10  -2  -3    1.51    0.59
  10  -2  -3    1.38    0.61
 -10  -2   3    1.01    0.34
  10  -2  -3    1.04    0.66
  10  -2  -3    0.99    0.54
 -10  -2   3    0.78    0.44
 -10  -2   3    1.10    0.50
 -10   2   3    1.45    0.63
   9  -2  -3    4.38    0.70
   9  -2  -3    6.05    0.74
  -9  -2   3    5.95    0.72
  -9  -2   3    4.54    0.75
   9  -2  -3    6.32    0.92
   9  -2  -3    6.44    0.85
  -9  -2   3    6.24    0.69
  -9   2   3    5.75    0.85
  -8  -2   3    4.63    0.60
   8  -2  -3    6.90    0.87
  -8  -2   3    4.39    0.70
   8  -2  -3    5.74    0.70
  -8  -2   3    7.14    0.73
   8  -2  -3    6.76    0.73
   8  -2  -3    5.74    0.83
  -8   2   3    5.55    0.86
  -8   2   3    6.41    0.72
  -7  -2   3    4.63    0.66
   7  -2  -3    5.12    0.68
  -7  -2   3    5.53    0.60
   7  -2  -3    4.94    0.72
  -7   2   3    4.77    0.71
   6  -2  -3   65.38    3.77
  -6  -2   3   66.79    3.75
  -6  -2   3   63.44    3.52
  -6   2   3   64.77    3.81
  -5  -2   3   24.57    1.54
   4  -2  -3   37.10    2.01
   4  -2  -3   35.21    2.82
  -4   2   3   33.60    2.81
   3  -2  -3  449.54   28.74
   3   2  -3  439.69   28.60
  -3   2   3  441.87   28.79
   2  -2  -3   44.87    3.12
  -2  -2   3   43.70    3.00
  -2   2   3   46.21    3.13
   2   2  -3   39.74    2.94
  -2   2   3   41.92    3.13
   1  -2  -3  183.58   13.01
  -1  -2   3  199.19   12.86
   1  -2  -3  202.01   13.07
  -1  -2   3  210.67   12.86
   1   2  -3  202.69   12.84
  -1   2   3  185.61   13.04
  -1   2   3  209.60   13.06
   0  -2   3    4.21    0.46
   0  -2  -3    3.77    0.62
   0  -2   3    4.36    0.47
   0  -2  -3    4.31    0.67
   0  -2  -3    4.64    0.42
   0   2   3    5.70    0.74
   0   2   3    4.87    0.70
   1  -2   3  119.14    8.07
   1  -2   3  138.04    8.10
  -1  -2  -3  121.61    8.26
  -1  -2  -3  121.88    6.15
   1   2   3  128.48    8.29
   1   2   3  127.73    8.31
   1   2   3  118.09    6.16
  -1   2  -3  115.32    6.22
   2  -2   3    2.37    0.38
   2  -2   3    2.82    0.47
  -2  -2  -3    2.61    0.57
   2  -2   3    2.49    0.45
   2   2   3    1.72    0.51
   2   2   3    1.54    0.32
   3  -2   3   14.29    1.38
   3  -2   3   15.79    1.07
   3   2   3   16.68    1.08
   3   2   3   15.75    1.54
   4  -2   3   52.58    4.07
   4   2   3   58.80    4.27
   5  -2   3   65.52    3.56
  -5  -2  -3   60.26    3.66
   5  -2   3   62.66    4.73
   5   2   3   61.98    3.62
  -6  -2  -3    0.62    0.38
   6  -2   3    0.90    0.27
   6  -2   3    0.60    0.33
   6  -2   3    0.81    0.34
   6   2   3    0.94    0.45
   6   2   3    0.90    0.39
   7  -2   3   60.89    3.27
   7  -2   3   62.46    3.64
   7  -2   3   63.49    3.19
  -7  -2  -3   66.17    3.94
   7  -2   3   66.93    3.78
   7   2   3   66.74    3.77
   7   2   3   67.90    3.36
   7   2   3   65.04    3.86
   8  -2   3   18.18    1.31
  -8  -2  -3   19.11    1.19
   8  -2   3   18.92    1.47
  -8  -2  -3   19.20    1.63
   8  -2   3   20.64    1.28
   8  -2   3   22.49    1.48
   8  -2   3   19.75    1.14
   8   2   3   19.64    1.39
   8   2   3   20.70    1.64
   8   2   3   19.45    1.55
   8   2   3   19.94    1.38
   9  -2   3    5.72    0.67
   9  -2   3    5.69    0.73
   9  -2   3    5.15    0.47
   9  -2   3    5.93    0.47
   9  -2   3    6.76    0.84
  -9  -2  -3    4.38    0.82
   9  -2   3    4.99    0.66
   9   2   3    7.07    0.79
   9   2   3    5.79    0.84
   9   2   3    5.55    0.91
   9   2   3    7.44    0.81
  10  -2   3    1.59    0.53
 -10  -2  -3    1.68    0.58
  10  -2   3    2.35    0.51
  10  -2   3    1.30    0.42
  10  -2   3    1.68    0.45
  10   2   3    1.52    0.60
  10   2   3    1.21    0.50
  10   2   3    2.24    0.56
  10   2   3    1.93    0.52
  11  -2   3    1.21    0.39
  11  -2   3    1.18    0.37
  11  -2   3    0.70    0.36
  11   2   3    1.26    0.47
  11   2   3    1.24    0.41
  11   2   3    1.22    0.43
  12  -3  -3   11.19    0.80
 -12  -3   3    9.98    0.75
  12  -3  -3    9.85    0.75
  11  -3  -3    3.26    0.64
  11  -3  -3    3.25    0.59
  11  -3  -3    4.07    0.74
 -11  -3   3    4.13    0.56
 -11  -3   3    2.61    0.48
  11  -3  -3    3.34    0.59
  11  -3  -3    2.93    0.42
  10  -3  -3    1.43    0.67
 -10  -3   3    1.32    0.32
  10  -3  -3    2.40    0.62
 -10  -3   3    1.41    0.47
  10  -3  -3    2.22    0.66
  10  -3  -3    2.06    0.59
 -10  -3   3    1.58    0.51
 -10  -3   3    1.35    0.57
 -10   3   3    1.85    0.66
  -9  -3   3   13.41    1.24
  -9  -3   3   12.35    1.03
   9  -3  -3   12.75    1.14
   9  -3  -3   14.63    1.32
   9  -3  -3   13.69    1.32
   9  -3  -3   15.25    1.15
  -9  -3   3   12.49    0.87
  -9  -3   3   13.61    1.11
  -9   3   3   15.88    1.48
   8  -3  -3   29.15    1.98
  -8  -3   3   30.83    1.55
  -8  -3   3   25.50    1.68
  -8  -3   3   27.15    1.77
   8  -3  -3   27.32    1.96
   8  -3  -3   28.98    1.80
  -8  -3   3   29.23    1.93
   8  -3  -3   28.58    1.73
  -8   3   3   29.04    1.79
  -8   3   3   25.58    2.01
   7  -3  -3   41.61    2.44
  -7  -3   3   39.93    2.27
  -7  -3   3   42.19    2.46
   7  -3  -3   36.11    2.44
  -7  -3   3   40.26    2.00
  -7   3   3   35.98    2.24
  -7   3   3   38.69    2.53
  -6  -3   3   60.29    3.29
   6  -3  -3   63.00    3.55
  -6  -3   3   61.42    3.50
  -6   3   3   58.07    3.59
   5  -3  -3   54.05    3.18
  -5  -3   3   56.38    3.15
   4  -3  -3   89.19    6.68
   4  -3  -3   97.32    5.35
   4  -3  -3  100.03    4.91
   3  -3  -3   62.98    4.37
  -3   3   3   58.46    4.37
  -2  -3   3   65.53    4.37
   2  -3  -3   72.71    4.62
   2  -3  -3   62.74    4.54
   2   3  -3   62.16    4.30
  -2   3   3   62.34    4.56
   1  -3  -3  150.70   10.18
   1  -3  -3  158.68   10.24
  -1  -3   3  159.76    9.93
  -1  -3   3  157.01    9.92
  -1   3   3  141.09   10.19
   0  -3   3    5.20    0.44
   0  -3   3    4.79    0.41
   0  -3  -3    3.65    0.67
   0  -3  -3    5.54    0.43
   0  -3  -3    4.73    0.76
   0   3   3    4.87    0.73
   1  -3   3   59.27    3.72
   1  -3   3   56.12    3.72
  -1  -3  -3   54.08    3.99
  -1  -3  -3   54.84    2.86
  -1  -3  -3   61.81    4.07
   1   3   3   53.19    2.89
   1   3   3   52.88    3.99
  -1   3  -3   55.39    3.00
   2  -3   3   49.53    3.55
   2  -3   3   53.18    2.78
  -2  -3  -3   51.19    3.78
   2  -3   3   56.61    3.56
   2   3   3   51.12    2.73
   2   3   3   46.47    3.73
   3  -3   3   13.32    1.31
   3  -3   3   15.11    1.04
   3   3   3   15.75    1.54
   3   3   3   15.89    1.05
   4  -3   3    8.03    1.10
   5  -3   3   38.27    2.15
  -5  -3  -3   36.39    2.28
   5   3   3   34.62    2.25
  -6  -3  -3  119.63    6.99
   6  -3   3  122.34    5.84
   6  -3   3  132.44    6.85
   6  -3   3  124.41    6.56
   6   3   3  122.71    6.71
   6   3   3  120.46    6.95
  -7  -3  -3    2.43    0.31
   7  -3   3    2.56    0.45
   7  -3   3    2.26    0.52
   7  -3   3    1.94    0.40
  -7  -3  -3    1.78    0.55
   7  -3   3    2.22    0.31
   7  -3   3    3.21    0.52
   7   3   3    1.83    0.49
   7   3   3    2.52    0.66
   7   3   3    2.06    0.58
  -8  -3  -3    0.43    0.53
   8  -3   3   -0.13    0.41
   8  -3   3   -0.32    0.20
   8  -3   3    0.30    0.23
   8  -3   3    0.64    0.40
  -8  -3  -3    0.50    0.18
   8  -3   3    0.29    0.36
   8  -3   3    0.00    0.44
   8   3   3    0.23    0.54
   8   3   3   -0.10    0.45
   8   3   3    0.21    0.42
   8   3   3   -0.10    0.50
   9  -3   3   52.77    3.21
   9  -3   3   56.02    2.86
   9  -3   3   56.31    3.18
   9  -3   3   52.71    2.95
  -9  -3  -3   53.48    3.46
   9   3   3   53.26    3.39
   9   3   3   55.92    3.36
   9   3   3   56.84    3.07
   9   3   3   56.63    2.97
  10  -3   3    0.57    0.40
  10  -3   3    0.79    0.35
 -10  -3  -3    0.26    0.46
  10  -3   3    0.25    0.42
 -10  -3  -3    1.31    0.56
  10  -3   3    0.90    0.43
  10   3   3    1.10    0.47
  10   3   3    0.96    0.57
  10   3   3    0.69    0.50
  10   3   3    0.68    0.47
  11  -3   3    3.03    0.44
  11  -3   3    3.93    0.45
  11   3   3    3.76    0.52
  11   3   3    3.17    0.51
  12  -4  -3   -0.11    0.27
  12  -4  -3    0.26    0.30
 -12  -4   3   -0.21    0.26
 -11  -4   3    0.54    0.38
  11  -4  -3   -0.15    0.43
 -11  -4   3    0.11    0.31
  11  -4  -3    0.11    0.47
  11  -4  -3    0.70    0.46
  11  -4  -3    0.34    0.24
 -10  -4   3   11.54    1.05
  10  -4  -3    9.33    1.02
 -10  -4   3    8.59    0.86
  10  -4  -3   10.02    0.81
  10  -4  -3   13.03    1.04
  10  -4  -3   13.61    1.07
  10  -4  -3   12.20    1.21
 -10  -4   3   10.29    0.92
 -10   4   3   12.02    1.27
   9  -4  -3    1.54    0.55
   9  -4  -3    1.30    0.66
   9  -4  -3    1.42    0.56
  -9  -4   3    1.58    0.54
   9  -4  -3    1.52    0.60
  -9  -4   3    0.26    0.40
  -9  -4   3    0.66    0.45
  -9  -4   3    1.17    0.29
  -9   4   3    0.98    0.64
  -8  -4   3   -0.16    0.33
   8  -4  -3    0.11    0.41
  -8  -4   3   -0.51    0.36
  -8  -4   3   -0.54    0.37
   8  -4  -3    0.43    0.45
  -8  -4   3    0.41    0.26
   8  -4  -3    0.33    0.48
   8  -4  -3    0.16    0.50
  -8   4   3    0.35    0.40
  -8   4   3    0.70    0.54
  -7  -4   3   32.96    2.06
  -7  -4   3   34.15    1.92
   7  -4  -3   31.55    2.12
   7  -4  -3   28.09    2.04
  -7  -4   3   32.64    1.67
  -7   4   3   31.17    1.93
  -7   4   3   36.70    2.24
  -6  -4   3    1.63    0.36
  -6  -4   3    1.90    0.26
   6  -4  -3    1.41    0.45
  -6  -4   3    1.63    0.33
   6  -4  -3    3.30    0.49
   5  -4  -3   18.03    1.22
  -5  -4   3   17.55    1.15
   4  -4  -3   17.53    1.80
   4  -4  -3   18.97    1.24
   4  -4  -3   19.78    1.19
   3  -4  -3  333.94   22.52
   3  -4  -3  346.70   18.81
   3  -4  -3  352.66   16.80
  -2  -4   3   93.50    5.95
   2  -4  -3   88.79    6.19
  -2   4   3   86.29    6.20
   1  -4  -3  244.74   16.68
   1  -4  -3  280.24   16.80
  -1  -4   3  251.19   16.34
   1  -4  -3  262.25   12.40
  -1   4   3  236.02   16.68
   0  -4  -3   45.11    3.45
   0  -4  -3   52.48    3.56
   0  -4  -3   47.91    2.39
   0   4   3   45.85    3.44
   0   4  -3   45.10    2.56
   1  -4   3   53.49    3.36
   1  -4   3   49.87    3.36
  -1  -4  -3   57.09    3.80
  -1  -4  -3   47.72    3.71
  -1  -4  -3   51.14    2.59
   1   4   3   48.81    3.69
   1   4   3   46.31    2.63
   2  -4   3    0.78    0.29
   2  -4   3    0.46    0.25
  -2  -4  -3    0.42    0.43
   2   4   3    0.36    0.42
   2   4   3    0.62    0.26
   3  -4   3  205.85   13.93
   3  -4   3  224.64   10.61
  -3  -4  -3  206.71   14.19
   3   4   3  212.97   10.57
  -4  -4  -3    2.21    0.40
   4  -4   3    2.10    0.62
   4  -4   3    2.58    0.30
   5  -4   3   27.29    1.62
   5  -4   3   26.46    1.31
   5  -4   3   28.11    1.31
  -5  -4  -3   25.25    1.76
   5   4   3   25.48    1.76
   6  -4   3    2.38    0.42
   6  -4   3    3.00    0.43
   6  -4   3    2.46    0.25
  -6  -4  -3    2.29    0.53
   6  -4   3    2.31    0.24
   6   4   3    2.09    0.52
   6   4   3    2.84    0.64
  -7  -4  -3    2.43    0.65
   7  -4   3    2.92    0.47
  -7  -4  -3    3.19    0.64
   7  -4   3    2.74    0.43
   7  -4   3    2.77    0.49
  -7  -4  -3    2.93    0.50
   7  -4   3    3.37    0.26
   7  -4   3    2.58    0.49
  -7  -4  -3    3.12    0.27
   7  -4   3    3.02    0.26
   7   4   3    2.16    0.60
   7   4   3    2.87    0.54
   7   4   3    3.82    0.77
  -8  -4  -3   10.21    1.21
   8  -4   3   15.00    1.11
  -8  -4  -3   13.77    1.09
  -8  -4  -3   13.88    1.22
   8  -4   3   13.44    0.99
   8  -4   3   14.02    1.15
   8  -4   3   15.23    1.06
   8   4   3   14.91    1.36
   8   4   3   13.10    1.14
   8   4   3   14.74    1.38
   9  -4   3    6.00    0.64
  -9  -4  -3    5.84    0.72
   9  -4   3    5.58    0.63
  -9  -4  -3    4.18    0.71
  -9  -4  -3    6.29    0.92
   9  -4   3    6.82    0.67
   9  -4   3    5.06    0.68
   9   4   3    5.52    0.90
   9   4   3    6.36    0.78
   9   4   3    7.31    0.93
  10  -4   3    3.09    0.50
  10  -4   3    3.50    0.50
 -10  -4  -3    2.94    0.57
  10  -4   3    3.04    0.47
 -10  -4  -3    2.61    0.50
  10   4   3    3.63    0.63
  10   4   3    3.40    0.67
  10   4   3    1.97    0.65
  11  -4   3    2.22    0.37
  11  -4   3    2.82    0.38
 -11  -4  -3    2.72    0.44
  11   4   3    2.62    0.46
  12  -5  -3    0.25    0.26
  12  -5  -3   -0.02    0.27
 -12  -5   3   -0.11    0.24
  11  -5  -3    5.39    0.61
  11  -5  -3    4.45    0.66
  11  -5  -3    4.62    0.60
 -11  -5   3    3.68    0.53
  10  -5  -3    3.23    0.71
  10  -5  -3    2.97    0.60
 -10  -5   3    2.50    0.49
  10  -5  -3    3.25    0.60
  10  -5  -3    2.32    0.39
  10  -5  -3    3.45    0.61
 -10  -5   3    1.80    0.48
 -10  -5   3    2.27    0.46
  -9  -5   3    7.12    0.72
   9  -5  -3    7.00    0.79
   9  -5  -3    6.48    0.88
   9  -5  -3    5.42    0.73
  -9  -5   3    6.90    0.79
  -9  -5   3    5.70    0.68
   9  -5  -3    5.35    0.85
   8  -5  -3   38.14    2.44
  -8  -5   3   38.13    1.85
   8  -5  -3   35.36    2.09
   8  -5  -3   35.23    2.19
  -8  -5   3   38.86    2.38
   8  -5  -3   38.32    2.44
  -8  -5   3   35.56    2.11
  -8  -5   3   39.38    2.19
  -8  -5   3   40.10    1.85
  -8   5   3   34.25    2.21
   7  -5  -3   15.49    1.26
  -7  -5   3   14.69    0.83
  -7  -5   3   14.86    0.83
  -7  -5   3   15.32    1.15
   7  -5  -3   14.59    1.21
  -7  -5   3   17.05    1.06
  -7   5   3   13.52    1.07
  -6  -5   3   11.51    0.65
  -6  -5   3   11.85    0.84
   6  -5  -3   10.88    1.00
  -6  -5   3   11.73    0.92
  -6  -5   3   12.24    0.66
   6  -5  -3   11.57    1.02
   5  -5  -3   69.03    4.01
  -5  -5   3   71.47    3.72
  -5  -5   3   73.02    3.94
  -5  -5   3   69.01    3.30
   4  -5  -3    5.33    1.01
   4  -5  -3    6.58    0.61
   4  -5  -3    6.59    0.64
   3  -5  -3   90.32    7.01
   3  -5  -3  110.13    5.71
   2  -5  -3    7.27    1.00
  -2  -5   3    5.76    0.62
   2  -5  -3    6.14    0.57
  -1  -5   3    2.85    0.31
   1  -5  -3    2.96    0.66
  -1   5   3    3.30    0.69
   0  -5   3   77.72    4.45
   0  -5  -3   80.20    5.51
   0   5   3   76.12    5.44
   1  -5   3  104.08    6.64
  -1  -5  -3   92.31    7.07
   1  -5   3  106.78    5.80
   1  -5   3  104.17    6.65
  -2  -5  -3   26.65    2.44
   2  -5   3   28.93    2.10
   2   5   3   30.77    1.67
  -3  -5  -3    0.82    0.60
   3  -5   3    0.99    0.36
   3  -5   3    1.44    0.44
   3   5   3    0.88    0.36
  -4  -5  -3    6.91    0.70
   4  -5   3    7.47    0.54
  -5  -5  -3   27.60    1.80
   5  -5   3   27.01    1.59
   5   5   3   25.58    1.80
  -6  -5  -3   12.66    1.12
   6  -5   3   11.79    0.92
   6  -5   3   12.48    0.90
   6   5   3   13.48    1.16
   6   5   3   10.80    1.12
   7  -5   3    5.79    0.65
  -7  -5  -3    6.12    0.69
  -7  -5  -3    4.03    0.74
   7  -5   3    4.73    0.53
   7  -5   3    5.03    0.53
  -7  -5  -3    3.65    0.64
   7  -5   3    5.51    0.58
   7   5   3    6.22    0.86
   7   5   3    4.70    0.82
  -8  -5  -3   -0.23    0.39
   8  -5   3   -0.06    0.34
  -8  -5  -3   -0.53    0.50
  -8  -5  -3   -0.35    0.46
   8  -5   3    0.24    0.35
   8  -5   3    0.46    0.37
   8  -5   3    0.27    0.39
   8   5   3   -0.45    0.52
   8   5   3    0.41    0.49
   8   5   3   -0.59    0.54
   9  -5   3    1.59    0.45
   9  -5   3    1.05    0.41
   9  -5   3    1.93    0.43
  -9  -5  -3    1.38    0.48
  -9  -5  -3    1.37    0.50
   9   5   3    0.75    0.65
   9   5   3    1.09    0.57
   9   5   3    1.36    0.56
  10  -5   3   22.01    1.24
 -10  -5  -3   18.18    1.40
 -10  -5  -3   23.00    1.39
  10  -5   3   22.81    1.30
 -10  -5  -3   20.30    1.20
  10   5   3   21.97    1.36
  10   5   3   21.29    1.62
  11  -5   3    0.51    0.27
  11  -5   3    0.42    0.27
 -11  -5  -3   -0.07    0.29
  11   5   3    0.22    0.32
 -11  -6   3    0.29    0.32
  11  -6  -3   -0.25    0.35
  11  -6  -3   -0.08    0.37
  11  -6  -3    0.05    0.38
  10  -6  -3   -0.26    0.39
 -10  -6   3   -0.15    0.27
  10  -6  -3   -0.18    0.50
 -10  -6   3   -0.12    0.37
  10  -6  -3    0.23    0.16
  10  -6  -3    0.18    0.17
  10  -6  -3    0.34    0.46
   9  -6  -3   10.19    0.95
  -9  -6   3   13.76    0.92
   9  -6  -3   13.01    1.06
   9  -6  -3   10.03    1.06
  -9  -6   3   12.46    1.01
   9  -6  -3   11.61    0.81
  -9  -6   3   10.96    0.97
   8  -6  -3    0.44    0.55
   8  -6  -3    1.62    0.61
   8  -6  -3    0.58    0.35
  -8  -6   3    0.63    0.39
  -8  -6   3    0.02    0.37
  -8  -6   3    1.55    0.41
   8  -6  -3    0.78    0.45
   8  -6  -3    1.42    0.54
   8  -6  -3    1.03    0.48
   7  -6  -3    0.24    0.50
  -7  -6   3    0.30    0.31
   7  -6  -3   -0.35    0.35
  -7  -6   3    0.16    0.33
  -7  -6   3    0.14    0.29
   7  -6  -3    1.35    0.47
   7  -6  -3   -0.01    0.35
   7  -6  -3    0.51    0.48
  -7   6   3    0.15    0.35
   6  -6  -3    0.12    0.35
  -6  -6   3    0.19    0.26
  -6  -6   3    0.09    0.23
   6  -6  -3    0.06    0.39
  -5  -6   3   84.20    4.40
   5  -6  -3   83.37    4.61
  -5  -6   3   86.52    4.66
   5  -6  -3   83.72    4.75
   4  -6  -3    0.54    0.33
   4  -6  -3    0.41    0.59
   4  -6  -3    0.25    0.26
   3  -6  -3   27.14    2.52
   3  -6  -3   32.73    1.93
   2  -6  -3    8.00    0.70
   2  -6  -3    7.80    1.09
   1  -6  -3   79.58    5.94
   1  -6  -3   86.05    4.81
  -1  -6   3   90.48    5.50
  -1  -6   3   80.15    4.82
   0  -6   3    0.56    0.30
   0  -6  -3    0.25    0.25
   0  -6  -3    1.47    0.54
   1  -6   3   83.08    4.98
   1  -6   3   76.07    4.40
  -1  -6  -3   68.98    5.43
  -1  -6  -3   73.44    4.33
   2  -6   3   22.94    1.51
  -2  -6  -3   22.89    2.09
  -2  -6  -3   21.40    1.41
   2  -6   3   21.80    1.65
  -3  -6  -3    0.00    0.51
   3  -6   3    0.34    0.33
   5  -6   3    9.52    0.70
   6  -6   3    0.52    0.30
   7  -6   3    0.32    0.30
  -7  -6  -3    0.90    0.48
  -7  -6  -3   -0.16    0.37
   7  -6   3    0.40    0.32
   7  -6   3    0.25    0.32
   8  -6   3    0.41    0.36
   8  -6   3    0.57    0.34
  -8  -6  -3    0.24    0.47
   8  -6   3    0.17    0.36
  -8  -6  -3    0.58    0.43
   8   6   3    0.86    0.61
  -9  -6  -3    1.05    0.33
  -9  -6  -3    0.77    0.46
   9  -6   3    0.70    0.35
   9  -6   3    0.90    0.38
  -9  -6  -3    0.51    0.45
   9   6   3    0.82    0.60
   9   6   3    2.08    0.70
  10  -6   3    1.19    0.34
 -10  -6  -3    0.98    0.40
 -10  -6  -3    0.70    0.23
 -10  -6  -3    1.35    0.42
  10  -6   3    1.18    0.34
  10   6   3    1.13    0.57
 -11  -6  -3    1.21    0.32
  11  -6   3    1.47    0.26
 -11  -7   3    6.46    0.55
  11  -7  -3    6.28    0.57
  11  -7  -3    4.95    0.56
  10  -7  -3    0.14    0.34
  10  -7  -3   -0.25    0.42
 -10  -7   3    0.05    0.35
  10  -7  -3   -0.62    0.42
  10  -7  -3   -0.26    0.42
  -9  -7   3    3.62    0.54
   9  -7  -3    3.74    0.33
   9  -7  -3    3.12    0.69
   9  -7  -3    4.12    0.73
  -9  -7   3    3.69    0.39
   9  -7  -3    4.15    0.64
   9  -7  -3    3.76    0.61
   9  -7  -3    2.95    0.32
   9  -7  -3    3.65    0.62
   8  -7  -3    1.35    0.49
   8  -7  -3    1.50    0.49
   8  -7  -3    0.76    0.32
  -8  -7   3    1.11    0.33
   8  -7  -3    1.20    0.59
   8  -7  -3    1.41    0.63
   8  -7  -3    1.34    0.51
  -8  -7   3    1.00    0.40
   7  -7  -3    0.26    0.47
   7  -7  -3    0.13    0.42
  -7  -7   3    0.55    0.32
   7  -7  -3    0.40    0.29
   7  -7  -3    0.79    0.53
   7  -7  -3    0.52    0.42
  -7  -7   3    0.59    0.27
   7  -7  -3    0.48    0.38
   6  -7  -3    5.50    0.66
   6  -7  -3    5.30    0.53
   6  -7  -3    7.37    0.80
  -6  -7   3    6.25    0.52
   5  -7  -3   57.38    3.12
  -5  -7   3   55.39    2.85
   5  -7  -3   52.93    2.71
   5  -7  -3   52.81    3.16
  -4  -7   3    3.01    0.34
   4  -7  -3    2.76    0.42
   4  -7  -3    2.47    0.48
   3  -7  -3   67.62    5.54
   3  -7  -3   76.24    4.29
   3  -7  -3   85.17    4.48
   2  -7  -3   20.73    1.40
   2  -7  -3   20.45    1.91
  -1  -7   3   53.21    3.13
   1  -7  -3   51.11    3.09
  -1  -7   3   57.32    3.43
   1  -7  -3   43.78    3.86
   0  -7  -3    2.17    0.61
   0  -7   3    1.73    0.41
   0  -7  -3    1.94    0.39
  -1  -7  -3    0.37    0.29
   1  -7   3    0.63    0.34
  -1  -7  -3    0.38    0.47
   2  -7   3    4.39    0.55
  -2  -7  -3    3.63    0.86
   2  -7   3    4.09    0.60
  -2  -7  -3    3.80    0.52
  -3  -7  -3   85.73    6.28
   4  -7   3    3.68    0.37
  -4  -7  -3    3.00    0.48
   6  -7   3   66.58    3.39
   6  -7   3   70.78    3.54
   6  -7   3   69.01    3.98
  -6  -7  -3   70.16    3.68
  -7  -7  -3   11.88    1.04
   7  -7   3   10.69    0.85
   7  -7   3   11.46    0.79
  -7  -7  -3    9.86    0.92
   8  -7   3    5.00    0.52
  -8  -7  -3    4.20    0.65
   8  -7   3    5.90    0.58
  -8  -7  -3    4.88    0.71
  -8  -7  -3    5.59    0.56
   9  -7   3    0.23    0.32
  -9  -7  -3    0.64    0.41
   9  -7   3    0.46    0.31
  -9  -7  -3    0.43    0.27
  -9  -7  -3    0.68    0.43
  10  -7   3   11.42    0.73
 -10  -7  -3   11.09    0.86
 -10  -7  -3    8.87    0.79
  10  -7   3   10.15    0.68
 -11  -8   3    0.38    0.25
  11  -8  -3    0.76    0.32
  11  -8  -3    0.53    0.30
  10  -8  -3   20.83    1.40
 -10  -8   3   20.92    1.26
  10  -8  -3   21.50    1.35
  10  -8  -3   20.65    1.28
   9  -8  -3   35.74    2.27
  -9  -8   3   38.31    2.09
   9  -8  -3   38.51    2.30
   9  -8  -3   38.68    2.16
   9  -8  -3   35.58    2.36
   9  -8  -3   36.28    2.06
   8  -8  -3   19.09    0.97
  -8  -8   3   20.07    1.26
   8  -8  -3   20.45    1.31
   8  -8  -3   18.75    1.41
   8  -8  -3   19.68    0.97
   8  -8  -3   18.41    1.35
   8  -8  -3   19.11    1.55
   7  -8  -3   33.39    1.99
   7  -8  -3   32.73    2.00
   7  -8  -3   34.79    1.75
  -7  -8   3   34.09    1.91
   7  -8  -3   35.90    2.18
   7  -8  -3   33.07    2.25
   7  -8  -3   37.36    2.22
   6  -8  -3   48.84    2.76
   6  -8  -3   43.02    2.75
   6  -8  -3   45.70    2.73
   6  -8  -3   46.03    2.28
   6  -8  -3   45.53    2.49
   5  -8  -3    0.63    0.24
   5  -8  -3    1.69    0.41
   5  -8  -3    0.86    0.40
  -4  -8   3   20.64    1.12
   4  -8  -3   19.04    1.08
   4  -8  -3   21.34    1.35
   4  -8  -3   20.12    1.35
   4  -8  -3   20.41    1.47
   3  -8  -3   10.33    0.89
   3  -8  -3    8.56    0.74
  -3  -8   3    8.50    0.54
   2  -8  -3  166.34    8.86
  -2  -8   3  160.90    7.41
   2  -8  -3  143.90   10.72
   1  -8  -3    1.72    0.62
   1  -8  -3    1.23    0.40
  -1  -8   3    1.32    0.41
   0  -8   3    1.08    0.41
   0  -8  -3    1.20    0.55
   0  -8  -3    1.12    0.37
  -1  -8  -3  201.24   11.64
   1  -8   3  224.00   11.74
  -1  -8  -3  205.71   14.10
   2  -8   3   10.43    0.59
  -2  -8  -3   10.11    0.90
  -2  -8  -3    9.95    1.42
   2  -8   3   11.38    0.99
  -3  -8  -3   16.32    1.15
   3  -8   3   16.80    0.95
  -3  -8  -3   16.77    0.94
   4  -8   3   59.01    2.95
  -4  -8  -3   57.82    3.15
   4  -8   3   51.84    3.57
  -4  -8  -3   55.19    2.76
  -5  -8  -3    2.29    0.35
   6  -8   3   18.56    1.39
  -6  -8  -3   17.60    1.26
  -6  -8  -3   19.17    1.10
   6  -8   3   17.52    1.09
  -7  -8  -3   27.94    1.81
   7  -8   3   30.63    1.66
  -7  -8  -3   30.96    1.59
  -7  -8  -3   28.52    1.88
   8  -8   3    7.53    0.63
  -8  -8  -3    7.97    0.83
  -8  -8  -3    9.11    0.88
  -8  -8  -3    9.13    0.61
   8  -8   3    8.91    0.72
  -9  -8  -3    8.52    0.78
   9  -8   3    9.40    0.68
  -9  -8  -3    7.73    0.78
  10  -8   3    0.12    0.22
 -10  -8  -3   -0.07    0.32
  11  -9  -3    0.44    0.25
  10  -9  -3    1.91    0.41
 -10  -9   3    1.12    0.32
  10  -9  -3    1.35    0.36
  10  -9  -3    1.04    0.40
   9  -9  -3   25.35    1.55
   9  -9  -3   23.45    1.46
   9  -9  -3   26.36    1.75
   9  -9  -3   24.15    1.63
  -9  -9   3   25.64    1.47
  -8  -9   3   61.21    3.31
   8  -9  -3   61.85    3.60
   8  -9  -3   61.81    3.77
   8  -9  -3   64.84    3.64
   8  -9  -3   67.79    3.27
   8  -9  -3   63.21    3.40
   7  -9  -3   20.08    1.50
   7  -9  -3   20.23    1.33
   7  -9  -3   20.64    1.43
  -7  -9   3   20.79    1.25
   7  -9  -3   19.48    1.35
   7  -9  -3   20.78    1.60
  -6  -9   3   31.03    1.78
   6  -9  -3   34.05    1.59
   6  -9  -3   31.73    1.87
   6  -9  -3   30.60    2.04
   6  -9  -3   34.72    1.58
   6  -9  -3   35.52    2.10
   6  -9  -3   30.40    2.10
   5  -9  -3   55.97    3.32
   5  -9  -3   58.36    2.74
   5  -9  -3   59.65    2.75
   5  -9  -3   54.96    3.25
   4  -9  -3    5.83    0.59
   4  -9  -3    4.10    0.56
  -4  -9   3    5.31    0.49
   4  -9  -3    4.59    0.71
   4  -9  -3    4.84    0.38
   4  -9  -3    5.62    0.40
   3  -9  -3    3.58    0.30
   3  -9  -3    3.98    0.31
   3  -9  -3    3.33    0.48
  -3  -9   3    3.68    0.36
   3  -9  -3    3.67    0.60
   3  -9  -3    4.04    0.46
   2  -9  -3    5.43    0.38
  -2  -9   3    5.32    0.37
   2  -9  -3    6.99    0.77
   1  -9  -3   68.93    3.15
  -1  -9   3   67.71    3.96
   1  -9  -3   61.72    3.92
   0  -9  -3    8.48    0.52
   0  -9   3    8.53    0.92
   0  -9  -3    9.73    0.89
   1  -9   3    4.08    0.65
  -1  -9  -3    4.28    0.35
  -1  -9  -3    3.92    0.61
   2  -9   3   54.45    3.36
  -2  -9  -3   51.81    3.27
   2  -9   3   56.15    2.78
   2  -9   3   52.04    3.50
  -2  -9  -3   57.60    3.02
  -2  -9  -3   53.67    2.62
   3  -9   3   52.59    3.67
  -3  -9  -3   56.18    2.79
   3  -9   3   59.54    2.99
  -3  -9  -3   61.86    3.22
   4  -9   3    5.21    0.85
  -4  -9  -3    5.96    0.48
   4  -9   3    5.95    0.48
  -4  -9  -3    5.82    0.64
   5  -9   3    2.09    0.52
  -5  -9  -3    2.39    0.45
  -5  -9  -3    1.91    0.32
  -6  -9  -3    3.01    0.54
  -6  -9  -3    2.88    0.35
   6  -9   3    2.91    0.62
  -6  -9  -3    2.75    0.54
  -7  -9  -3    1.04    0.48
  -7  -9  -3    0.97    0.25
  -7  -9  -3    1.26    0.47
  -7  -9  -3    0.91    0.24
   7  -9   3    1.28    0.31
  -8  -9  -3    5.97    0.72
   8  -9   3    4.93    0.47
  -8  -9  -3    6.09    0.65
  -9  -9  -3   15.41    1.08
  -9  -9  -3   14.41    0.96
 -10  -9  -3   10.16    0.74
  10 -10  -3   26.68    1.47
  10 -10  -3   27.06    1.41
 -10 -10   3   25.41    1.41
   9 -10  -3    0.46    0.34
   9 -10  -3    0.62    0.39
   9 -10  -3    1.33    0.42
  -9 -10   3    0.55    0.30
   9 -10  -3    1.31    0.55
   8 -10  -3    0.93    0.63
  -8 -10   3    0.77    0.32
   8 -10  -3    0.89    0.46
   8 -10  -3    0.48    0.42
   8 -10  -3    0.78    0.45
   7 -10  -3    8.16    0.75
   7 -10  -3    9.00    1.01
   7 -10  -3    9.25    0.87
  -7 -10   3    7.99    0.68
   7 -10  -3    7.21    0.72
   7 -10  -3    7.25    0.74
   6 -10  -3    3.95    0.61
   6 -10  -3    2.95    0.49
  -6 -10   3    3.40    0.41
   6 -10  -3    3.67    0.69
   6 -10  -3    4.05    0.53
   5 -10  -3    0.72    0.43
   5 -10  -3   -0.09    0.29
   5 -10  -3    0.14    0.44
   5 -10  -3   -0.24    0.31
   5 -10  -3   -0.67    0.34
   4 -10  -3    0.49    0.34
  -4 -10   3    0.43    0.26
   4 -10  -3    0.14    0.30
  -3 -10   3    2.23    0.31
   3 -10  -3    1.93    0.37
   3 -10  -3    1.98    0.36
   3 -10  -3    1.44    0.51
   2 -10  -3    1.65    0.35
  -2 -10   3    2.00    0.51
   2 -10  -3    1.57    0.34
  -2 -10   3    1.80    0.24
   2 -10  -3    2.35    0.54
   1 -10  -3    0.79    0.28
  -1 -10   3    0.47    0.42
  -1 -10   3    0.12    0.43
   1 -10  -3   -0.04    0.38
  -1 -10   3    0.43    0.15
   0 -10   3   60.54    3.92
   0 -10   3   65.90    2.92
   0 -10   3   61.07    3.76
   0 -10  -3   56.80    3.71
   0 -10  -3   60.69    3.35
   0 -10  -3   62.12    2.87
  -1 -10  -3   10.19    1.02
  -1 -10  -3   10.95    0.57
   1 -10   3   10.53    1.06
  -1 -10  -3   11.30    0.57
  -1 -10  -3   11.07    0.87
   1 -10   3   13.08    1.24
  -2 -10  -3   22.43    1.41
   2 -10   3   21.68    1.66
   2 -10   3   23.20    1.21
   2 -10   3   19.96    1.77
  -2 -10  -3   21.98    1.10
  -2 -10  -3   22.87    1.10
   3 -10   3   98.62    4.93
  -3 -10  -3   95.08    4.53
   3 -10   3   92.56    5.95
  -3 -10  -3  100.33    4.53
  -3 -10  -3   96.07    5.18
   4 -10   3    4.04    0.43
   4 -10   3    4.28    0.47
  -4 -10  -3    3.93    0.51
   4 -10   3    5.07    0.86
  -4 -10  -3    5.15    0.35
   4 -10   3    4.84    0.67
  -4 -10  -3    4.73    0.37
   4 -10   3    5.07    0.66
   4 -10   3    3.98    0.61
   5 -10   3    0.59    0.48
  -5 -10  -3    0.40    0.37
  -5 -10  -3    0.43    0.16
  -5 -10  -3    0.48    0.17
  -6 -10  -3    4.56    0.62
  -6 -10  -3    5.85    0.62
   6 -10   3    3.68    0.69
  -7 -10  -3   -0.10    0.37
  -7 -10  -3    0.29    0.43
  -8 -10  -3    5.91    0.53
  -8 -10  -3    5.16    0.64
  -9 -10  -3    5.77    0.61
 -10 -10  -3    0.27    0.24
  10 -11  -3    1.54    0.26
  10 -11  -3    1.14    0.27
   9 -11  -3   -0.08    0.32
   9 -11  -3    0.42    0.50
   9 -11  -3   -0.42    0.29
   8 -11  -3   -0.02    0.58
   8 -11  -3   -0.37    0.38
   8 -11  -3    0.06    0.35
  -8 -11   3    0.30    0.25
   7 -11  -3    5.42    0.83
   7 -11  -3    4.73    0.60
   7 -11  -3    3.57    0.52
   7 -11  -3    4.39    0.57
   6 -11  -3    4.17    0.75
   6 -11  -3    3.86    0.65
   6 -11  -3    3.29    0.56
   6 -11  -3    5.27    0.56
   5 -11  -3    2.05    0.59
   5 -11  -3    1.87    0.39
   5 -11  -3    1.68    0.52
   5 -11  -3    1.73    0.43
   4 -11  -3   -0.05    0.41
   4 -11  -3    0.54    0.30
   4 -11  -3    0.17    0.43
   4 -11  -3   -0.24    0.27
   4 -11  -3    0.07    0.32
   3 -11  -3    5.54    0.54
   3 -11  -3    7.79    0.64
   3 -11  -3    5.08    0.68
  -3 -11   3    5.84    0.50
  -2 -11   3   -0.16    0.41
   2 -11  -3    0.18    0.27
  -2 -11   3    0.20    0.19
   2 -11  -3   -0.19    0.24
  -1 -11   3    2.05    0.25
   1 -11  -3    2.40    0.60
  -1 -11   3    2.25    0.60
   1 -11  -3    2.16    0.36
   0 -11   3    0.71    0.47
   0 -11  -3    0.12    0.26
   0 -11   3    0.34    0.17
   0 -11  -3    0.22    0.42
   0 -11   3   -0.16    0.49
  -1 -11  -3   10.81    0.85
  -1 -11  -3   11.44    1.10
   1 -11   3   10.94    0.63
   1 -11   3   11.53    1.19
   1 -11   3    7.83    1.03
  -2 -11  -3   -0.09    0.28
   2 -11   3    0.82    0.25
   2 -11   3   -0.10    0.37
   2 -11   3    0.77    0.58
   2 -11   3    0.66    0.19
   3 -11   3    0.20    0.26
   3 -11   3   -0.27    0.40
   3 -11   3    0.26    0.18
   3 -11   3    0.31    0.58
  -3 -11  -3    0.11    0.29
   3 -11   3    0.13    0.38
  -3 -11  -3   -0.44    0.28
   4 -11   3   16.91    1.01
   4 -11   3   16.23    1.23
  -4 -11  -3   17.07    1.11
   4 -11   3   16.14    1.50
   4 -11   3   14.85    1.26
   4 -11   3   15.49    0.97
   5 -11   3    0.46    0.50
  -5 -11  -3    0.75    0.39
  -5 -11  -3    0.86    0.36
  -6 -11  -3    1.34    0.45
   6 -11   3    1.78    0.60
  -6 -11  -3    1.20    0.37
  -7 -11  -3   -0.03    0.40
  -7 -11  -3    0.49    0.27
  -8 -11  -3    0.75    0.39
  -9 -11  -3    0.22    0.27
   9 -12  -3    3.80    0.37
   9 -12  -3    4.17    0.60
   9 -12  -3    4.12    0.41
   8 -12  -3    0.33    0.56
   8 -12  -3    0.92    0.36
   8 -12  -3    0.23    0.32
   7 -12  -3    3.28    0.50
   7 -12  -3    3.82    0.74
   7 -12  -3    2.37    0.41
   6 -12  -3    2.18    0.60
   6 -12  -3    1.82    0.66
   6 -12  -3    1.70    0.41
   5 -12  -3    0.15    0.32
   5 -12  -3    0.50    0.48
   5 -12  -3    0.39    0.52
   4 -12  -3    4.43    0.69
   4 -12  -3    3.87    0.47
   4 -12  -3    3.54    0.63
  -3 -12   3    1.61    0.45
   3 -12  -3    0.95    0.50
   3 -12  -3    0.97    0.45
   3 -12  -3    1.40    0.37
   3 -12  -3    0.89    0.32
  -3 -12   3    1.17    0.30
   2 -12  -3   15.83    1.34
  -2 -12   3   20.05    1.59
  -2 -12   3   17.77    1.19
   2 -12  -3   16.72    1.09
   2 -12  -3   16.41    1.04
   2 -12  -3   16.37    1.19
  -2 -12   3   16.69    0.94
   1 -12  -3    0.01    0.24
  -1 -12   3    0.00    0.44
  -1 -12   3    0.39    0.37
   1 -12  -3    0.61    0.29
  -1 -12   3    0.40    0.53
  -1 -12   3    0.36    0.21
   1 -12  -3    0.46    0.41
   0 -12   3   39.93    2.43
   0 -12  -3   40.62    2.28
   0 -12  -3   40.56    2.64
   0 -12   3   41.90    2.03
   0 -12  -3   40.14    2.18
   0 -12   3   45.50    2.87
   0 -12   3   38.46    2.27
   0 -12   3   42.23    2.68
   1 -12   3   41.49    2.56
   1 -12   3   42.01    2.99
   1 -12   3   41.08    2.39
  -1 -12  -3   46.31    2.42
   1 -12   3   46.20    2.15
  -1 -12  -3   41.56    2.30
   1 -12   3   42.90    2.82
   2 -12   3    2.42    0.59
   2 -12   3    3.95    0.36
   2 -12   3    3.66    0.57
  -2 -12  -3    3.29    0.42
   2 -12   3    2.74    0.51
   2 -12   3    2.37    0.36
   2 -12   3    2.90    0.76
  -2 -12  -3    3.24    0.45
   3 -12   3   45.32    2.24
   3 -12   3   39.90    2.73
  -3 -12  -3   42.08    2.28
   3 -12   3   39.92    2.90
   3 -12   3   40.56    2.35
   3 -12   3   41.44    2.14
   4 -12   3    3.73    0.83
   4 -12   3    5.08    0.67
  -4 -12  -3    5.02    0.56
   4 -12   3    3.68    0.48
  -4 -12  -3    4.00    0.40
   4 -12   3    3.05    0.61
  -5 -12  -3    0.11    0.22
  -5 -12  -3    0.12    0.35
   5 -12   3    0.28    0.50
   5 -12   3    0.44    0.45
  -6 -12  -3    5.20    0.61
  -7 -12  -3    9.75    0.82
  -8 -12  -3    2.82    0.41
  -9 -12  -3    8.66    0.60
  -9 -13   3   12.34    0.84
   9 -13  -3   12.68    0.93
   8 -13  -3   41.74    2.61
   8 -13  -3   42.85    2.26
  -8 -13   3   46.43    2.39
   7 -13  -3   11.40    1.08
   7 -13  -3    9.92    0.70
   7 -13  -3   11.09    0.80
   6 -13  -3    2.33    0.68
   6 -13  -3    1.61    0.41
   6 -13  -3    2.20    0.60
   6 -13  -3    2.25    0.39
   5 -13  -3    0.34    0.52
   5 -13  -3    0.77    0.58
  -5 -13   3    0.52    0.47
   5 -13  -3    0.75    0.33
   4 -13  -3    0.12    0.49
   4 -13  -3    0.43    0.50
   4 -13  -3    0.66    0.31
  -4 -13   3    1.13    0.48
  -3 -13   3    1.38    0.32
  -3 -13   3    1.82    0.50
   3 -13  -3    1.20    0.54
   3 -13  -3    1.31    0.49
   3 -13  -3    1.77    0.35
  -2 -13   3    9.79    0.66
   2 -13  -3   10.44    1.05
  -2 -13   3   10.83    0.94
   2 -13  -3   10.24    0.75
   1 -13  -3   41.01    2.65
  -1 -13   3   42.12    2.87
   1 -13  -3   39.34    2.15
  -1 -13   3   43.57    2.66
  -1 -13   3   39.90    2.27
  -1 -13   3   36.93    2.38
  -1 -13   3   40.55    2.02
   0 -13   3    4.28    0.60
   0 -13  -3    4.66    0.47
   0 -13   3    4.49    0.59
   0 -13   3    4.48    0.41
   0 -13   3    5.49    0.74
   0 -13   3    4.48    0.89
   0 -13  -3    4.13    0.64
   1 -13   3   30.91    2.40
   1 -13   3   34.62    1.71
  -1 -13  -3   31.51    1.74
   1 -13   3   30.79    1.62
   1 -13   3   32.19    2.20
   1 -13   3   31.41    1.87
   1 -13   3   28.68    1.96
  -2 -13  -3   48.83    2.67
   2 -13   3   48.48    3.43
   2 -13   3   50.93    3.26
   2 -13   3   55.09    2.68
   2 -13   3   49.11    2.78
   2 -13   3   50.85    2.54
   3 -13   3    9.18    0.65
   3 -13   3    9.02    0.68
   3 -13   3    9.57    1.19
  -3 -13  -3    9.77    0.75
   3 -13   3    9.92    0.86
   3 -13   3    9.02    0.99
  -4 -13  -3    1.64    0.39
   4 -13   3    1.08    0.52
   4 -13   3    1.51    0.73
   4 -13   3    1.10    0.28
   5 -13   3    6.19    0.76
  -5 -13  -3    7.25    0.64
  -6 -13  -3    1.78    0.40
  -7 -13  -3    1.91    0.37
  -8 -13  -3   12.58    0.79
   8 -14  -3    1.72    0.43
  -8 -14   3    2.01    0.39
   7 -14  -3   18.50    1.04
   7 -14  -3   18.05    1.36
  -7 -14   3   17.93    1.20
   6 -14  -3   21.72    1.73
   6 -14  -3   25.47    1.36
  -6 -14   3   25.06    1.55
   6 -14  -3   25.42    1.72
   5 -14  -3    0.18    0.52
   5 -14  -3   -0.20    0.54
   5 -14  -3    0.23    0.28
  -5 -14   3   -0.43    0.44
   4 -14  -3    5.18    0.71
   4 -14  -3    3.62    0.42
   4 -14  -3    3.52    0.71
  -4 -14   3    4.12    0.61
   3 -14  -3    8.72    0.96
  -3 -14   3    6.54    0.76
  -3 -14   3    7.65    0.62
   3 -14  -3    8.81    0.84
   3 -14  -3    8.16    0.65
  -2 -14   3    8.27    0.61
   2 -14  -3    8.65    0.67
  -2 -14   3    9.30    0.84
   2 -14  -3    9.69    0.99
   1 -14  -3    9.13    0.70
  -1 -14   3    8.66    0.86
   1 -14  -3   11.83    1.09
  -1 -14   3   10.57    0.90
  -1 -14   3    8.93    0.62
  -1 -14   3   10.33    1.04
   0 -14   3    5.96    0.67
   0 -14  -3    6.12    0.77
   0 -14   3    5.17    0.45
   0 -14  -3    5.41    0.50
   0 -14   3    4.92    0.73
   0 -14   3    6.14    0.66
   1 -14   3   74.60    3.62
   1 -14   3   67.12    3.41
  -1 -14  -3   69.05    3.58
   1 -14   3   71.69    4.35
   1 -14   3   68.79    4.54
   1 -14   3   68.57    3.70
  -2 -14  -3    5.74    0.52
   2 -14   3    5.64    0.52
   2 -14   3    6.09    0.69
   2 -14   3    4.73    0.97
   2 -14   3    5.86    0.79
   2 -14   3    6.25    0.47
  -3 -14  -3    4.18    0.47
   3 -14   3    4.06    0.70
   3 -14   3    4.06    0.46
   3 -14   3    4.73    0.61
   3 -14   3    3.92    0.40
   4 -14   3   18.30    1.45
   4 -14   3   18.62    1.15
  -4 -14  -3   20.03    1.16
  -5 -14  -3   18.05    1.07
   5 -14   3   16.28    1.31
  -6 -14  -3    3.46    0.40
  -7 -14  -3    6.10    0.49
   8 -15  -3    3.13    0.42
   7 -15  -3    0.33    0.39
  -7 -15   3    0.22    0.33
  -6 -15   3    1.02    0.42
   6 -15  -3    0.05    0.48
   6 -15  -3    1.23    0.48
  -5 -15   3    8.30    0.79
   5 -15  -3   10.26    0.96
   5 -15  -3    8.62    0.94
  -4 -15   3    4.17    0.61
   4 -15  -3    5.88    0.71
   4 -15  -3    5.43    0.80
  -3 -15   3    0.86    0.47
   3 -15  -3    1.23    0.60
  -3 -15   3    0.45    0.29
   2 -15  -3   14.17    1.22
  -2 -15   3    9.97    0.71
  -2 -15   3   11.89    0.97
  -1 -15   3    2.90    0.36
  -1 -15   3    3.04    0.54
  -1 -15   3    3.02    0.63
   1 -15  -3    3.64    0.72
   0 -15  -3   10.58    1.03
   0 -15   3    9.92    0.64
   0 -15   3    8.63    0.95
   0 -15  -3    9.83    0.67
   0 -15   3    9.14    0.63
   0 -15   3    9.47    0.83
   1 -15   3    2.43    0.31
  -1 -15  -3    3.22    0.36
   1 -15   3    3.13    0.56
   1 -15   3    2.33    0.33
   1 -15   3    3.12    0.67
  -2 -15  -3   13.48    0.80
   2 -15   3   12.41    1.16
   2 -15   3   11.75    0.97
   2 -15   3   11.72    0.76
   2 -15   3   11.05    0.75
   3 -15   3    2.22    0.29
   3 -15   3    1.63    0.55
   3 -15   3    1.67    0.34
   3 -15   3    2.18    0.47
  -3 -15  -3    1.94    0.32
   4 -15   3    7.16    0.81
  -4 -15  -3    7.52    0.58
   5 -15   3    8.62    0.88
  -5 -15  -3   10.38    0.67
  -6 -15  -3   11.10    0.68
   7 -16  -3    0.31    0.29
  -7 -16   3    0.57    0.27
   6 -16  -3    3.02    0.51
  -6 -16   3    2.33    0.41
   6 -16  -3    3.21    0.49
   5 -16  -3    3.48    0.64
  -5 -16   3    4.77    0.54
   5 -16  -3    5.21    0.63
  -4 -16   3    0.07    0.38
   4 -16  -3    0.47    0.45
   4 -16  -3    0.05    0.50
   3 -16  -3   17.41    1.44
  -3 -16   3   18.39    1.19
  -2 -16   3    0.23    0.24
  -2 -16   3    0.29    0.40
   2 -16  -3    0.29    0.56
  -1 -16   3    2.46    0.33
  -1 -16   3    3.35    0.61
   1 -16  -3    2.80    0.66
  -1 -16   3    2.13    0.49
   0 -16   3    0.52    0.20
   0 -16   3    0.52    0.24
   0 -16   3    0.84    0.43
   0 -16  -3    0.85    0.52
   0 -16   3    0.70    0.52
   1 -16   3    4.68    0.56
   1 -16   3    3.39    0.38
   1 -16   3    3.86    0.36
   1 -16   3    5.24    0.73
   2 -16   3    3.92    0.37
   2 -16   3    3.45    0.38
   2 -16   3    4.84    0.72
   2 -16   3    4.71    0.54
   3 -16   3    0.66    0.19
   3 -16   3    0.63    0.27
   3 -16   3    0.66    0.49
   4 -16   3    3.12    0.54
   5 -16   3   19.09    1.32
   5 -17  -3    0.67    0.40
   5 -17  -3    0.27    0.32
  -5 -17   3    0.59    0.30
  -4 -17   3    8.32    0.71
   4 -17  -3    8.77    0.87
   3 -17  -3    0.91    0.51
  -3 -17   3    0.78    0.37
  -2 -17   3    2.60    0.44
   2 -17  -3    2.73    0.62
  -2 -17   3    2.70    0.29
  -1 -17   3    3.06    0.49
   1 -17  -3    3.28    0.63
  -1 -17   3    2.71    0.34
  -1 -17   3    4.07    0.34
  -1 -17   3    4.74    0.63
   0 -17   3    5.52    0.45
   0 -17   3    7.45    0.64
   0 -17   3    5.69    0.44
   0 -17  -3    9.07    0.82
   0 -17   3    6.93    0.76
   1 -17   3   12.80    0.78
   1 -17   3   14.06    0.96
   1 -17   3   17.07    1.20
   1 -17   3   13.91    0.82
   2 -17   3    8.75    0.86
   2 -17   3    7.64    0.52
   3 -17   3    1.47    0.45
   4 -17   3    3.55    0.51
   4 -18  -3    1.11    0.39
  -4 -18   3    1.31    0.28
  -3 -18   3    2.61    0.37
   3 -18  -3    2.86    0.51
  -2 -18   3    3.97    0.45
   2 -18  -3    5.86    0.65
   1 -18  -3    2.73    0.51
  -1 -18   3    2.61    0.46
  -1 -18   3    2.50    0.38
   0 -18   3    2.81    0.39
   0 -18   3    2.57    0.47
   1 -18   3    2.07    0.34
   1 -18   3    2.04    0.44
   2 -18   3    8.44    0.78
   3 -18   3    5.70    0.58
   1 -19   3    5.01    0.51
 -12   0   4    7.98    0.68
  11   0  -4   29.98    2.00
 -11   0   4   29.18    1.50
 -11   0   4   25.90    1.76
 -11   0   4   28.48    1.69
 -11   0   4   26.90    1.91
  10   0  -4    5.68    0.93
 -10   0   4    5.38    0.66
 -10   0   4    4.85    0.80
  10   0  -4    6.45    0.95
 -10   0   4    4.69    0.70
   9   0  -4    4.01    0.84
   9   0  -4    3.26    0.78
  -9   0   4    2.56    0.68
  -9   0   4    4.37    0.68
  -9   0   4    4.19    0.61
  -8   0   4   83.53    4.48
  -8   0   4   87.67    4.70
  -8   0   4   87.39    4.69
  -8   0   4   84.19    5.00
  -7   0   4   50.58    2.85
  -7   0   4   49.93    3.06
  -6   0   4   85.68    4.71
  -6   0   4   79.63    4.42
  -5   0   4   91.80    6.53
  -5   0   4   91.51    5.12
  -4   0   4   31.83    2.57
  -3   0   4   30.90    2.44
   3   0  -4   31.89    2.39
   2   0  -4   83.03    5.73
  -2   0   4   89.12    5.79
  -2   0   4   82.67    5.75
  -1   0   4  579.03   38.95
   1   0  -4  632.68   38.96
   0   0  -4  202.32   13.05
   0   0   4  190.79   13.08
   0   0  -4  208.11    9.97
  -1   0  -4  521.45   33.63
   1   0   4  556.54   33.70
   1   0   4  489.59   33.66
   2   0   4   69.22    3.44
   2   0   4   59.56    4.48
   3   0   4    9.20    0.77
   3   0   4    6.97    1.02
   4   0   4   46.66    2.78
   4   0   4   51.20    3.78
   5   0   4   46.18    2.73
   6   0   4    2.97    0.52
   6   0   4    3.70    0.58
   7   0   4   20.94    1.54
   7   0   4   23.13    1.57
   7   0   4   20.57    1.30
   7   0   4   19.56    1.35
   8   0   4   39.27    2.43
   8   0   4   39.17    2.02
   8   0   4   35.32    2.08
   8   0   4   39.52    2.42
   8   0   4   35.11    2.16
   9   0   4   16.38    1.19
   9   0   4   16.58    1.29
   9   0   4   16.23    1.01
   9   0   4   16.31    1.20
  10   0   4   31.35    1.78
  10   0   4   32.14    1.83
  10   0   4   28.90    1.96
  10   0   4   31.71    1.97
  11   0   4    5.71    0.55
  11   0   4    5.69    0.54
 -12  -1   4    9.05    0.70
  12  -1  -4    6.17    0.62
 -12   1   4   10.07    0.71
  11  -1  -4    0.93    0.48
  11  -1  -4    0.91    0.54
  11  -1  -4    0.77    0.59
 -11  -1   4    0.39    0.43
 -11  -1   4    1.17    0.43
 -11  -1   4    0.95    0.42
 -11  -1   4    1.49    0.28
 -11   1   4    1.85    0.45
 -11   1   4    1.75    0.50
 -11   1   4    1.28    0.52
 -10  -1   4    2.38    0.55
 -10  -1   4    1.97    0.62
  10  -1  -4    2.67    0.61
  10  -1  -4    1.60    0.70
  10  -1  -4    2.32    0.67
 -10  -1   4    2.65    0.41
 -10  -1   4    1.40    0.47
 -10   1   4    3.25    0.74
 -10   1   4    1.82    0.57
  -9  -1   4    1.12    0.58
  -9  -1   4    1.83    0.47
   9  -1  -4    1.72    0.65
  -9  -1   4    1.53    0.50
   9  -1  -4    1.52    0.63
   9  -1  -4    1.48    0.57
  -9   1   4    0.98    0.58
  -9   1   4    1.81    0.56
  -9   1   4    1.58    0.48
  -8  -1   4   17.98    1.28
   8  -1  -4   17.13    1.46
   8  -1  -4   18.22    1.46
  -8  -1   4   17.67    1.27
   8  -1  -4   17.19    1.25
  -8  -1   4   16.69    1.18
  -8  -1   4   16.29    1.35
  -8   1   4   16.29    1.43
  -8   1   4   16.64    1.18
  -8   1   4   15.79    1.25
  -8   1   4   16.59    1.27
   7  -1  -4   18.85    1.49
   7  -1  -4   21.06    1.57
  -7  -1   4   22.08    1.49
  -7  -1   4   20.58    1.33
  -7   1   4   20.49    1.50
  -7   1   4   20.31    1.35
  -7   1   4   18.08    1.34
   6  -1  -4    7.45    0.78
  -6  -1   4    6.63    0.61
  -6  -1   4    5.03    0.60
  -6   1   4    5.78    0.69
  -5  -1   4   46.41    3.46
  -5  -1   4   43.13    2.55
  -5   1   4   42.35    2.58
  -4  -1   4  317.17   21.21
  -4   1   4  332.48   21.33
  -3  -1   4    0.80    0.38
   3  -1  -4    0.81    0.40
  -3   1   4    0.48    0.42
  -2  -1   4    4.85    0.64
  -2  -1   4    3.22    0.55
   2  -1  -4    5.16    0.71
  -2   1   4    4.96    0.74
  -2   1   4    3.95    0.70
   2   1  -4    4.66    0.63
  -1  -1   4  208.03   12.69
  -1  -1   4  185.95   12.66
   1  -1  -4  193.29   12.76
  -1   1   4  206.41   12.84
   1   1  -4  184.73   12.65
  -1   1   4  190.20   12.78
   0  -1   4  286.42   20.49
   0  -1   4  346.20   20.55
   0  -1  -4  311.98   15.57
   0  -1  -4  315.38   20.59
   0   1  -4  295.76   20.45
   0   1   4  357.91   20.70
   0   1   4  312.03   20.63
   1  -1   4   72.44    4.90
   1  -1   4   75.50    4.92
  -1  -1  -4   72.64    4.99
   1   1   4   86.06    5.10
  -1   1  -4   68.95    4.85
   1   1   4   60.16    4.97
  -2  -1  -4  107.01    6.68
   2  -1   4  101.36    5.02
   2  -1   4   92.73    6.55
   2   1   4   84.35    6.61
   2   1   4  101.18    5.01
   3  -1   4   82.40    4.18
   3  -1   4   77.64    5.50
   3   1   4   75.52    5.57
   3   1   4   78.56    4.15
   4  -1   4  206.75   13.52
   4  -1   4  195.93   10.93
   4   1   4  209.58   13.62
   4   1   4  197.18   10.97
   5  -1   4   39.99    2.35
   5   1   4   38.94    2.39
   6  -1   4   66.22    3.45
   6  -1   4   74.09    4.07
   6  -1   4   75.18    3.93
   6   1   4   72.83    3.98
   6   1   4   66.48    4.09
   7  -1   4    9.01    0.88
   7  -1   4    8.55    0.65
   7  -1   4    7.79    0.69
   7  -1   4   10.58    0.81
   7  -1   4    8.27    0.85
   7   1   4    6.02    0.69
   7   1   4    6.22    0.81
   7   1   4    7.31    0.73
   7   1   4    8.04    0.93
   8  -1   4    2.12    0.61
   8  -1   4    1.09    0.51
   8  -1   4    1.38    0.45
   8  -1   4    0.82    0.32
   8  -1   4    0.89    0.40
   8   1   4    0.97    0.43
   8   1   4    1.64    0.58
   8   1   4    1.58    0.51
   8   1   4    0.28    0.55
   9  -1   4   15.61    0.89
   9  -1   4   16.91    1.27
   9  -1   4   17.30    0.90
   9  -1   4   15.38    1.16
   9  -1   4   14.96    1.15
  -9  -1  -4   15.65    1.00
   9  -1   4   18.25    1.37
   9   1   4   14.07    1.16
   9   1   4   15.43    1.31
   9   1   4   15.74    1.40
   9   1   4   16.16    1.20
   9   1   4   15.30    1.03
  10  -1   4    1.12    0.44
  10  -1   4    1.11    0.38
  10  -1   4    1.26    0.48
  10  -1   4    1.29    0.44
  10   1   4    0.94    0.44
  10   1   4    1.03    0.47
  10   1   4    0.81    0.43
  10   1   4    0.95    0.52
  10   1   4    1.29    0.27
  11  -1   4    2.31    0.39
  11  -1   4    2.18    0.39
  11   1   4    2.90    0.44
  11   1   4    2.87    0.43
  12  -2  -4   -0.52    0.30
 -12  -2   4    0.52    0.31
 -11  -2   4    3.38    0.53
  11  -2  -4    3.17    0.58
  11  -2  -4    3.00    0.62
  11  -2  -4    2.41    0.64
 -11  -2   4    2.92    0.51
 -11   2   4    2.29    0.45
 -11   2   4    2.79    0.57
 -10  -2   4    2.72    0.39
 -10  -2   4    2.25    0.51
 -10  -2   4    3.32    0.67
  10  -2  -4    2.94    0.78
  10  -2  -4    3.31    0.66
 -10  -2   4    2.97    0.58
  10  -2  -4    2.64    0.69
 -10   2   4    2.75    0.72
 -10   2   4    3.11    0.65
 -10   2   4    3.71    0.57
  -9  -2   4    0.91    0.32
   9  -2  -4    0.38    0.56
   9  -2  -4    1.09    0.62
  -9  -2   4    0.20    0.48
  -9  -2   4    0.25    0.40
   9  -2  -4    0.89    0.54
  -9  -2   4    0.12    0.42
  -9   2   4    0.23    0.49
  -9   2   4    0.68    0.42
  -9   2   4    0.82    0.59
  -8  -2   4    0.10    0.41
  -8  -2   4    0.25    0.37
  -8  -2   4    1.56    0.49
   8  -2  -4    0.20    0.46
  -8  -2   4    0.68    0.42
   8  -2  -4    0.31    0.50
  -8  -2   4    0.75    0.30
   8  -2  -4    0.65    0.48
  -8   2   4    0.44    0.39
  -8   2   4   -0.11    0.42
  -8   2   4    0.41    0.43
  -8   2   4    0.22    0.49
   7  -2  -4   18.95    1.43
   7  -2  -4   19.02    1.46
  -7  -2   4   21.05    1.41
  -7  -2   4   18.12    1.25
  -7   2   4   19.34    1.48
  -7   2   4   18.12    1.26
  -6  -2   4  109.47    5.95
   6  -2  -4  102.58    6.00
  -6  -2   4  114.05    5.63
  -6   2   4   99.07    6.00
  -5  -2   4   15.34    1.08
  -5  -2   4   17.75    1.67
  -5   2   4   16.43    1.17
  -4  -2   4   14.84    1.44
  -4   2   4   16.26    1.63
   3  -2  -4   26.57    2.17
  -3  -2   4   25.65    2.03
  -3   2   4   27.46    2.23
   2  -2  -4   68.44    4.91
  -2  -2   4   67.29    4.76
  -2  -2   4   70.19    4.79
   2   2  -4   73.47    4.76
  -2   2   4   76.93    5.02
  -2   2   4   68.95    4.97
  -1  -2   4  109.74    6.57
  -1  -2   4   98.62    6.54
   1  -2  -4   97.77    6.73
  -1   2   4   93.51    6.76
   1   2  -4   96.67    6.50
  -1   2   4   98.07    6.78
   0  -2  -4  377.74   19.38
   0  -2   4  425.87   25.59
   0  -2  -4  387.11   25.76
   0  -2   4  406.22   25.57
   0   2   4  432.80   25.85
   0   2  -4  385.69   25.49
   0   2   4  367.86   25.78
   1  -2   4    4.34    0.57
   1  -2   4    4.47    0.58
  -1  -2  -4    4.78    0.76
   1   2   4    5.63    0.85
   1   2   4    4.65    0.81
   2  -2   4    0.93    0.33
   2  -2   4    0.47    0.32
  -2  -2  -4    0.56    0.44
   2   2   4    0.53    0.45
   2   2   4    0.76    0.30
   3  -2   4   41.79    3.24
   3  -2   4   46.05    2.52
   3   2   4   43.97    2.48
   3   2   4   43.88    3.42
   4  -2   4   13.45    1.48
   4  -2   4   14.29    0.97
   4   2   4   15.43    1.05
   5  -2   4   82.63    4.43
  -5  -2  -4   74.90    4.55
   5  -2   4   78.93    3.77
   5   2   4   78.38    4.50
  -6  -2  -4    1.12    0.46
   6  -2   4    1.16    0.27
   6  -2   4    2.02    0.42
   6  -2   4    1.65    0.43
   6   2   4    1.64    0.50
   6   2   4    1.91    0.49
   7  -2   4    0.36    0.40
   7  -2   4    0.40    0.34
   7  -2   4    0.35    0.25
   7  -2   4    0.62    0.42
  -7  -2  -4    0.55    0.48
   7  -2   4    0.52    0.34
   7   2   4    0.27    0.45
   7   2   4    0.25    0.37
   7   2   4    0.71    0.53
   7   2   4    1.18    0.43
   8  -2   4    8.11    0.79
   8  -2   4   11.16    1.01
  -8  -2  -4   11.71    1.24
   8  -2   4   11.27    0.68
   8  -2   4    9.88    0.65
   8  -2   4   11.44    0.91
   8  -2   4   10.38    1.00
  -8  -2  -4    9.63    0.77
   8   2   4   11.15    0.96
   8   2   4   11.15    0.99
   8   2   4   10.35    1.09
   8   2   4    9.24    1.11
   9  -2   4    0.09    0.39
  -9  -2  -4    0.47    0.57
   9  -2   4    0.16    0.47
   9  -2   4    0.09    0.44
   9  -2   4    0.18    0.42
   9   2   4    0.52    0.52
   9   2   4    0.32    0.51
   9   2   4    0.19    0.57
   9   2   4    0.88    0.46
 -10  -2  -4   10.44    1.09
  10  -2   4    9.37    0.88
  10  -2   4    9.55    0.83
  10  -2   4    9.75    0.81
  10   2   4   10.79    0.88
  10   2   4    9.66    0.69
  10   2   4   11.07    1.05
  10   2   4   10.32    0.90
 -10   2  -4    9.96    0.72
  10   2   4    8.56    0.90
  11  -2   4    4.95    0.49
  11  -2   4    6.09    0.52
  11   2   4    5.27    0.56
  11   2   4    5.21    0.55
  12  -3  -4   -0.09    0.31
  12  -3  -4   -0.09    0.29
 -12  -3   4   -0.11    0.27
 -11  -3   4    3.51    0.50
  11  -3  -4    3.93    0.62
  11  -3  -4    4.38    0.76
  11  -3  -4    4.48    0.64
 -11  -3   4    3.36    0.52
 -11   3   4    2.99    0.58
 -10  -3   4    0.96    0.45
 -10  -3   4    1.74    0.46
  10  -3  -4    2.01    0.65
  10  -3  -4    0.61    0.62
 -10  -3   4    1.82    0.23
 -10  -3   4    0.85    0.50
  10  -3  -4    1.74    0.59
 -10  -3   4    1.54    0.23
  10  -3  -4    0.95    0.52
 -10   3   4    1.22    0.62
   9  -3  -4    2.41    0.60
  -9  -3   4    1.60    0.48
  -9  -3   4    1.60    0.33
   9  -3  -4    2.10    0.60
   9  -3  -4    3.00    0.72
  -9  -3   4    1.56    0.50
   9  -3  -4    3.24    0.78
  -9  -3   4    0.84    0.50
  -9   3   4    2.78    0.71
   8  -3  -4   10.28    1.07
  -8  -3   4   10.73    0.90
   8  -3  -4    9.80    1.09
  -8  -3   4    6.63    0.83
   8  -3  -4   10.94    0.96
   8  -3  -4   11.09    0.98
  -8  -3   4    8.76    0.66
  -8  -3   4    9.33    0.83
  -8   3   4    7.80    0.83
  -8   3   4   10.49    1.14
   7  -3  -4    5.11    0.71
   7  -3  -4    4.63    0.70
  -7  -3   4    5.89    0.63
  -7  -3   4    5.28    0.57
  -7  -3   4    4.59    0.62
  -7  -3   4    5.18    0.46
  -7   3   4    5.87    0.80
  -7   3   4    6.14    0.64
  -6  -3   4   59.47    2.77
   6  -3  -4   55.46    3.39
  -6  -3   4   59.73    3.12
  -6  -3   4   53.49    3.29
  -6   3   4   57.53    3.43
  -5  -3   4   77.86    4.39
   5  -3  -4   80.22    4.48
  -5   3   4   78.53    4.51
  -3  -3   4   25.19    2.06
   3  -3  -4   28.49    2.30
  -3   3   4   29.84    2.37
  -2  -3   4    1.29    0.32
   2  -3  -4    1.53    0.50
  -2  -3   4    1.27    0.34
  -2   3   4    1.13    0.49
   1  -3  -4  153.02   10.54
  -1  -3   4  163.48   10.25
  -1  -3   4  163.17   10.26
  -1   3   4  150.69   10.58
   0  -3  -4    3.42    0.64
   0  -3   4    1.96    0.32
   0  -3   4    1.73    0.29
   0  -3  -4    1.54    0.30
   0   3   4    0.73    0.45
   1  -3   4  420.84   24.79
   1  -3   4  389.90   24.78
  -1  -3  -4  362.92   25.06
   1   3   4  363.92   25.10
  -2  -3  -4  210.23   14.06
   2  -3   4  213.62   13.80
   2   3   4  212.44   14.08
   2   3   4  209.66   10.50
   3  -3   4   30.81    2.32
   3  -3   4   30.42    1.83
   3   3   4   24.47    2.46
   3   3   4   31.61    1.82
   4  -3   4   26.80    2.28
   4  -3   4   27.83    1.61
   4   3   4   26.24    1.72
   5  -3   4   23.18    1.41
   5  -3   4   21.42    1.11
  -5  -3  -4   20.89    1.55
   5  -3   4   23.32    1.12
   5   3   4   20.29    1.50
   6  -3   4    8.53    0.76
   6  -3   4    6.58    0.68
   6  -3   4    8.81    0.50
  -6  -3  -4    4.86    0.75
   6  -3   4    7.15    0.48
   6   3   4    6.34    0.80
   6   3   4    7.28    0.84
   7  -3   4    0.88    0.20
   7  -3   4    0.68    0.36
   7  -3   4    0.59    0.40
   7  -3   4    1.06    0.41
   7  -3   4    0.80    0.20
  -7  -3  -4    0.08    0.49
   7  -3   4    0.51    0.34
   7   3   4    1.43    0.53
   7   3   4    0.26    0.42
   7   3   4    0.80    0.55
   7   3   4    0.27    0.38
  -8  -3  -4   26.49    1.51
   8  -3   4   27.07    1.63
   8  -3   4   26.97    1.57
   8  -3   4   29.78    1.80
  -8  -3  -4   26.24    2.01
   8  -3   4   28.76    1.77
   8   3   4   24.30    1.92
   8   3   4   29.09    1.73
   8   3   4   25.44    1.72
   8   3   4   26.72    1.96
   9  -3   4    0.38    0.45
  -9  -3  -4    0.22    0.53
   9  -3   4    0.51    0.42
   9  -3   4    0.45    0.38
   9  -3   4    0.18    0.40
   9   3   4   -0.36    0.49
   9   3   4    0.00    0.56
   9   3   4    0.67    0.52
   9   3   4    0.06    0.45
  10  -3   4    2.55    0.45
  10  -3   4    2.59    0.47
  10  -3   4    3.17    0.49
  10   3   4    2.57    0.52
  10   3   4    2.99    0.66
  10   3   4    2.30    0.40
  10   3   4    2.93    0.57
  10   3   4    1.96    0.50
  11  -3   4    3.39    0.39
  11  -3   4    2.85    0.37
  11   3   4    3.14    0.45
  11   3   4    2.32    0.42
  12  -4  -4    7.54    0.64
  12  -4  -4    8.80    0.69
 -12  -4   4    8.62    0.64
 -11  -4   4    0.55    0.28
  11  -4  -4    0.54    0.28
  11  -4  -4    0.45    0.51
  11  -4  -4    1.10    0.48
 -11  -4   4    0.48    0.38
  11  -4  -4    1.29    0.48
  10  -4  -4    2.09    0.57
 -10  -4   4    1.61    0.44
 -10  -4   4    0.35    0.41
  10  -4  -4    2.32    0.61
  10  -4  -4    0.39    0.50
  10  -4  -4    1.01    0.64
 -10  -4   4    1.42    0.45
 -10   4   4    1.24    0.64
   9  -4  -4   12.04    1.05
  -9  -4   4    9.91    0.92
  -9  -4   4   11.22    0.60
  -9  -4   4   11.00    1.04
   9  -4  -4   10.92    1.15
   9  -4  -4    7.87    1.06
   9  -4  -4    8.98    0.96
  -9  -4   4   10.76    0.59
  -9  -4   4   10.67    0.90
  -9   4   4    9.29    1.16
   8  -4  -4   11.31    1.24
   8  -4  -4   13.27    1.15
  -8  -4   4   11.50    0.76
  -8  -4   4   13.84    1.04
   8  -4  -4   12.89    1.25
   8  -4  -4   13.16    1.11
  -8  -4   4   14.13    1.14
  -8  -4   4   12.62    0.98
  -8  -4   4   13.54    0.78
  -8   4   4   13.93    1.32
  -8   4   4   13.81    1.09
   7  -4  -4    1.42    0.53
  -7  -4   4    1.58    0.42
  -7  -4   4    1.60    0.38
  -7  -4   4    1.11    0.38
  -7  -4   4    1.45    0.25
   7  -4  -4    1.27    0.48
  -7   4   4    1.69    0.44
  -7   4   4    1.49    0.53
   6  -4  -4  137.95    7.55
   6  -4  -4  134.24    7.26
  -6  -4   4  130.27    6.33
  -6  -4   4  137.45    6.34
  -6  -4   4  142.30    7.06
  -6  -4   4  134.03    7.44
  -6   4   4  131.86    7.61
  -5  -4   4    7.06    0.53
  -5  -4   4    6.02    0.58
   5  -4  -4    6.23    0.69
  -5   4   4    8.04    0.80
   4  -4  -4   38.91    2.33
   3  -4  -4   91.76    6.46
   2  -4  -4   81.85    5.84
  -2  -4   4   82.14    5.50
  -2  -4   4   86.21    5.54
  -2   4   4   81.94    5.87
  -1  -4   4    6.72    0.60
  -1  -4   4    8.03    0.61
   1  -4  -4    6.28    0.54
   1  -4  -4    6.82    1.01
  -1   4   4    6.03    0.96
   0  -4  -4   18.30    1.16
   0  -4   4   22.74    1.42
   0  -4   4   20.69    1.40
   0  -4  -4   20.58    1.84
   0   4   4   18.83    1.81
   1  -4   4    2.19    0.33
  -1  -4  -4    1.77    0.31
   1  -4   4    2.08    0.33
  -1  -4  -4    1.64    0.59
   1   4   4    1.49    0.57
  -2  -4  -4  134.45    9.31
   2  -4   4  136.20    8.96
   2   4   4  134.51    9.30
   2   4   4  138.96    6.89
   3  -4   4    3.46    0.64
   3   4   4    4.18    0.59
  -4  -4  -4   24.75    1.61
   4  -4   4   23.86    1.41
   4   4   4   23.28    1.58
  -5  -4  -4   16.37    1.33
   5  -4   4   18.74    1.15
   5  -4   4   18.51    1.14
  -5  -4  -4   17.29    1.35
   5   4   4   16.93    1.34
  -6  -4  -4    5.69    0.81
   6  -4   4    4.51    0.55
   6  -4   4    5.93    0.57
   6   4   4    4.10    0.69
   6   4   4    5.94    0.80
  -7  -4  -4   73.76    4.47
  -7  -4  -4   69.73    3.93
   7  -4   4   72.83    3.70
   7  -4   4   70.85    3.85
   7  -4   4   76.24    4.20
   7  -4   4   79.58    4.08
   7   4   4   79.85    4.36
   7   4   4   77.11    3.85
   7   4   4   74.03    4.42
   8  -4   4    2.75    0.46
   8  -4   4    2.28    0.45
   8  -4   4    3.25    0.54
  -8  -4  -4    1.45    0.63
   8  -4   4    2.34    0.45
   8   4   4    2.25    0.59
   8   4   4    2.29    0.71
   8   4   4    3.17    0.73
   8   4   4    2.08    0.53
   9  -4   4    7.39    0.69
  -9  -4  -4    7.04    0.86
   9  -4   4    7.38    0.69
   9  -4   4    7.19    0.73
   9   4   4    8.80    0.86
   9   4   4    7.89    0.83
   9   4   4    9.42    1.02
   9   4   4    7.33    0.99
 -10  -4  -4    3.04    0.57
  10  -4   4    4.22    0.48
  10  -4   4    5.16    0.53
  10   4   4    3.17    0.65
  10   4   4    4.76    0.62
  10   4   4    4.10    0.57
  11  -4   4    1.82    0.31
  11  -4   4    2.02    0.31
  11   4   4    2.73    0.42
 -12  -5   4    8.78    0.62
 -11  -5   4    0.25    0.35
  11  -5  -4   -0.12    0.44
  11  -5  -4    0.69    0.43
  11  -5  -4    0.63    0.43
 -10  -5   4   14.29    1.04
  10  -5  -4   13.18    1.12
 -10  -5   4   13.58    1.02
  10  -5  -4   13.90    1.08
 -10  -5   4   13.92    0.94
  10  -5  -4   13.19    1.26
  10  -5  -4   13.11    0.90
  10  -5  -4   11.71    1.19
 -10   5   4   14.30    1.32
   9  -5  -4    6.89    0.91
  -9  -5   4    9.50    0.82
  -9  -5   4    7.63    0.76
   9  -5  -4    9.28    1.08
   9  -5  -4   10.04    0.95
  -9  -5   4    7.91    0.82
   9  -5  -4    8.90    0.90
  -9   5   4   12.39    1.28
  -8  -5   4    1.86    0.42
  -8  -5   4    1.02    0.38
  -8  -5   4    0.79    0.42
   8  -5  -4    1.19    0.54
   8  -5  -4    0.63    0.56
   8  -5  -4    0.71    0.48
   8  -5  -4    1.16    0.57
  -8   5   4    0.95    0.60
  -8   5   4    1.12    0.47
  -7  -5   4   31.84    1.78
   7  -5  -4   30.58    2.04
  -7  -5   4   31.25    1.91
  -7  -5   4   30.51    1.73
   7  -5  -4   29.94    2.02
  -7   5   4   27.99    1.84
   6  -5  -4    7.87    0.87
   6  -5  -4    9.96    0.95
  -6  -5   4    9.59    0.77
  -6  -5   4    9.72    0.70
  -5  -5   4   12.98    0.77
  -5  -5   4   12.17    0.82
   5  -5  -4    9.96    0.96
   4  -5  -4   93.84    5.71
   4  -5  -4  112.52    5.84
   3  -5  -4   16.73    1.71
   2  -5  -4    5.83    0.99
  -2  -5   4    7.16    0.65
  -1  -5   4   67.24    4.33
   1  -5  -4   66.00    4.86
   0  -5  -4   19.02    1.81
   1  -5   4    0.24    0.18
   1  -5   4    0.33    0.18
  -1  -5  -4    0.53    0.50
   2  -5   4   77.26    5.15
  -2  -5  -4   72.95    5.57
   2   5   4   79.06    4.04
   3  -5   4   83.75    5.72
   4   5   4   12.51    1.02
   5  -5   4    1.53    0.29
  -5  -5  -4    1.06    0.43
  -5  -5  -4    1.83    0.48
   5   5   4    1.85    0.53
   5   5   4    0.94    0.42
  -6  -5  -4  103.35    5.93
  -6  -5  -4   97.48    5.38
   6  -5   4  102.68    5.45
   6  -5   4  101.70    5.64
   6   5   4  107.06    5.76
   6   5   4  109.51    5.94
  -7  -5  -4    2.29    0.51
   7  -5   4    2.59    0.43
   7  -5   4    2.17    0.40
  -7  -5  -4    1.40    0.55
  -7  -5  -4    1.94    0.62
   7  -5   4    2.39    0.45
   7   5   4    1.92    0.53
   7   5   4    2.49    0.67
   7   5   4    2.43    0.70
  -8  -5  -4    1.65    0.58
   8  -5   4    1.10    0.37
   8  -5   4    1.00    0.38
   8  -5   4    0.97    0.37
  -8  -5  -4    1.30    0.48
   8   5   4    1.48    0.63
   8   5   4    1.34    0.55
   8   5   4    0.49    0.64
   9  -5   4   12.10    0.87
   9  -5   4   12.59    0.92
  -9  -5  -4   11.03    1.05
  -9  -5  -4   11.88    1.02
   9   5   4   12.49    1.24
   9   5   4   14.01    1.09
   9   5   4   13.77    1.27
 -10  -5  -4    2.28    0.49
  10  -5   4    3.22    0.41
  10  -5   4    3.46    0.43
 -10  -5  -4    3.14    0.50
  10   5   4    2.45    0.50
  10   5   4    1.45    0.56
  11  -5   4    8.89    0.59
  11  -6  -4    1.55    0.45
  11  -6  -4    1.71    0.44
 -11  -6   4    2.03    0.39
  11  -6  -4    2.28    0.46
 -10  -6   4   16.59    1.09
  10  -6  -4   14.74    0.89
  10  -6  -4   16.57    1.21
  10  -6  -4   18.38    1.19
  10  -6  -4   15.41    1.24
  10  -6  -4   14.15    1.32
  -9  -6   4    1.38    0.35
   9  -6  -4    0.27    0.47
   9  -6  -4    1.10    0.54
   9  -6  -4    0.95    0.56
   9  -6  -4    1.31    0.38
  -9  -6   4    0.67    0.42
   9  -6  -4    0.64    0.61
   8  -6  -4    4.18    0.79
   8  -6  -4    4.82    0.76
  -8  -6   4    3.69    0.51
  -8  -6   4    4.24    0.53
  -8  -6   4    3.65    0.46
   8  -6  -4    3.87    0.62
   8  -6  -4    4.20    0.76
   8  -6  -4    3.66    0.62
  -8   6   4    4.58    0.63
  -7  -6   4   25.53    1.55
  -7  -6   4   24.61    1.42
   7  -6  -4   24.18    1.53
   7  -6  -4   22.21    1.68
  -7  -6   4   25.43    1.43
   7  -6  -4   21.93    1.66
   7  -6  -4   21.99    1.73
  -7   6   4   25.09    1.55
   6  -6  -4   43.73    2.68
   6  -6  -4   41.37    2.64
  -6  -6   4   44.53    2.51
  -6  -6   4   44.47    2.36
   5  -6  -4   34.56    2.20
  -5  -6   4   36.70    1.91
   5  -6  -4   35.52    2.20
   4  -6  -4    4.78    0.60
   4  -6  -4    5.04    0.58
   3  -6  -4   16.20    1.14
   3  -6  -4   13.63    1.62
   2  -6  -4  220.16   15.65
   2  -6  -4  243.09   12.99
  -2  -6   4  240.74   15.18
   1  -6  -4    4.38    0.88
   0  -6  -4    2.10    0.67
  -1  -6  -4  100.76    7.15
  -2  -6  -4    0.30    0.60
   2  -6   4    0.84    0.30
  -4  -6  -4   27.02    1.71
  -5  -6  -4   11.90    1.12
   5   6   4   13.73    1.15
   6  -6   4   10.21    0.71
  -6  -6  -4   10.26    0.88
   6  -6   4   10.21    0.76
   6   6   4   12.09    1.22
   6   6   4    8.68    1.02
   7  -6   4    1.47    0.34
  -7  -6  -4    1.71    0.48
  -7  -6  -4    1.26    0.53
   7  -6   4    1.18    0.35
   7   6   4    0.84    0.63
   7   6   4    1.59    0.62
   8  -6   4    2.51    0.42
  -8  -6  -4    2.84    0.63
   8  -6   4    2.18    0.40
  -8  -6  -4    3.12    0.56
   8   6   4    3.79    0.78
   8   6   4    2.13    0.59
   8   6   4    2.58    0.79
  -9  -6  -4    7.23    0.79
  -9  -6  -4    8.62    0.89
   9  -6   4   10.58    0.78
   9  -6   4    9.43    0.71
   9   6   4   10.45    1.09
   9   6   4   10.26    1.14
   9   6   4   10.34    0.92
  10  -6   4    0.61    0.28
 -10  -6  -4    0.49    0.37
  10  -6   4    0.30    0.28
  10   6   4    0.22    0.49
  10   6   4    0.47    0.39
  11  -7  -4   18.95    1.19
  11  -7  -4   19.59    1.15
 -11  -7   4   19.41    1.12
  10  -7  -4    0.39    0.46
  10  -7  -4   -0.29    0.46
  10  -7  -4   -0.31    0.41
 -10  -7   4    0.19    0.34
  10  -7  -4    0.36    0.40
  -9  -7   4   38.11    2.03
   9  -7  -4   35.73    2.29
   9  -7  -4   34.60    2.11
   9  -7  -4   34.53    2.32
   9  -7  -4   37.47    2.07
   9  -7  -4   37.13    2.35
   9  -7  -4   34.84    1.83
   8  -7  -4   65.34    3.95
  -8  -7   4   68.29    3.58
   8  -7  -4   66.68    3.55
   8  -7  -4   69.75    4.03
   8  -7  -4   71.05    4.05
   8  -7  -4   69.58    3.69
   7  -7  -4    0.99    0.56
   7  -7  -4    0.95    0.41
  -7  -7   4    1.74    0.36
   7  -7  -4    0.62    0.52
   7  -7  -4    1.64    0.39
   7  -7  -4    2.04    0.59
   6  -7  -4    0.00    0.41
   6  -7  -4    0.60    0.45
   5  -7  -4   73.59    4.27
   5  -7  -4   75.89    4.16
  -4  -7   4    0.86    0.25
   4  -7  -4    0.44    0.36
   4  -7  -4    0.77    0.34
   3  -7  -4   52.91    4.64
  -3  -7   4   64.57    2.99
   3  -7  -4   65.30    3.68
   2  -7  -4   25.81    2.34
  -2  -7   4   26.38    1.77
   2  -7  -4   23.54    1.67
   1  -7  -4   73.26    5.53
   1  -7  -4   78.46    4.41
   0  -7  -4    2.76    0.74
   0  -7  -4    2.15    0.43
  -1  -7  -4    1.50    0.39
  -1  -7  -4    0.71    0.60
  -2  -7  -4   58.23    4.82
   2  -7   4   68.82    4.25
  -2  -7  -4   60.59    3.70
   3  -7   4    5.07    0.38
   4  -7   4    1.80    0.28
  -4  -7  -4    1.89    0.44
   4  -7   4    2.11    0.58
  -5  -7  -4    0.14    0.41
  -6  -7  -4   35.96    2.15
   6  -7   4   37.18    1.97
   7  -7   4   45.94    2.45
  -7  -7  -4   44.46    2.75
  -7  -7  -4   49.08    2.66
   8  -7   4    9.35    0.75
  -8  -7  -4    8.85    0.89
   8  -7   4    9.34    0.69
  -8  -7  -4    8.66    0.92
   8   7   4   11.25    1.18
   9  -7   4    3.56    0.40
  -9  -7  -4    3.88    0.59
  -9  -7  -4    5.39    0.67
   9  -7   4    4.62    0.45
  -9  -7  -4    4.60    0.44
   9   7   4    4.86    0.79
   9   7   4    4.76    0.82
  10  -7   4   18.56    1.03
 -10  -7  -4   17.87    1.16
  11  -8  -4   -0.07    0.28
 -11  -8   4   -0.04    0.21
  11  -8  -4   -0.06    0.26
  10  -8  -4    0.62    0.42
 -10  -8   4    0.63    0.32
  10  -8  -4    0.51    0.43
  10  -8  -4    0.29    0.42
   9  -8  -4    2.42    0.57
   9  -8  -4    1.78    0.49
   9  -8  -4    1.83    0.54
  -9  -8   4    1.90    0.41
   9  -8  -4    1.06    0.61
   9  -8  -4    2.31    0.63
  -8  -8   4   16.97    1.14
   8  -8  -4   15.97    1.45
   8  -8  -4   18.70    1.31
   8  -8  -4   21.10    1.48
   8  -8  -4   17.42    1.37
   8  -8  -4   18.17    1.28
   8  -8  -4   17.78    0.98
   8  -8  -4   16.90    0.99
   7  -8  -4   16.85    1.02
   7  -8  -4   16.85    1.35
  -7  -8   4   17.09    1.08
   7  -8  -4   17.13    1.20
   7  -8  -4   16.90    1.39
   7  -8  -4   18.23    1.42
   6  -8  -4   16.09    1.12
  -6  -8   4   15.44    0.99
   6  -8  -4   17.38    1.31
   6  -8  -4   15.04    1.29
   6  -8  -4   18.54    1.36
   6  -8  -4   17.06    1.00
   5  -8  -4    0.71    0.41
   5  -8  -4    1.33    0.45
   5  -8  -4    0.71    0.27
   4  -8  -4   40.63    2.50
   4  -8  -4   41.91    2.48
   4  -8  -4   43.60    2.67
   4  -8  -4   38.98    2.11
  -4  -8   4   44.54    2.12
   3  -8  -4    7.94    0.84
  -3  -8   4    7.13    0.47
   2  -8  -4   10.60    1.52
   2  -8  -4   10.07    0.91
   1  -8  -4   45.49    2.59
   1  -8  -4   35.76    3.29
   0  -8  -4   20.17    1.40
   0  -8  -4   18.21    1.90
  -1  -8  -4   12.91    1.07
  -1  -8  -4   14.12    1.61
  -2  -8  -4    1.23    0.42
   2  -8   4    1.22    0.14
   3  -8   4   47.98    2.35
   3  -8   4   41.11    2.95
  -3  -8  -4   44.54    2.61
   4  -8   4   21.45    1.18
  -4  -8  -4   18.66    1.41
   4  -8   4   19.03    1.58
   5  -8   4    2.45    0.54
  -5  -8  -4    2.78    0.51
  -6  -8  -4    3.34    0.57
  -7  -8  -4    5.59    0.55
  -7  -8  -4    6.06    0.75
   7  -8   4    6.15    0.52
  -7  -8  -4    6.96    0.77
  -8  -8  -4   12.69    1.06
   8  -8   4   12.85    0.84
  -8  -8  -4   13.64    0.82
  -8  -8  -4   12.08    1.05
   9  -8   4    1.77    0.29
  -9  -8  -4    0.45    0.40
  -9  -8  -4    1.54    0.40
 -10  -8  -4    3.24    0.42
  11  -9  -4    8.62    0.61
  10  -9  -4    0.95    0.46
  10  -9  -4    2.11    0.41
  10  -9  -4    1.44    0.38
  10  -9  -4    1.89    0.43
 -10  -9   4    2.02    0.31
   9  -9  -4    0.57    0.57
   9  -9  -4    1.65    0.49
   9  -9  -4    1.77    0.50
   9  -9  -4    0.57    0.48
  -9  -9   4    0.69    0.31
   9  -9  -4    0.81    0.38
   8  -9  -4   17.58    1.29
  -8  -9   4   17.10    1.10
   8  -9  -4   18.59    1.29
   8  -9  -4   17.07    1.22
   8  -9  -4   17.02    1.45
   8  -9  -4   17.50    1.41
   7  -9  -4    1.47    0.50
   7  -9  -4    1.43    0.44
  -7  -9   4    1.26    0.33
   7  -9  -4    2.07    0.25
   7  -9  -4    2.67    0.68
   7  -9  -4    2.23    0.27
   7  -9  -4    1.48    0.58
   6  -9  -4   10.90    0.88
   6  -9  -4   11.13    0.70
  -6  -9   4   11.55    0.75
   6  -9  -4   10.22    1.01
   6  -9  -4   11.72    1.03
   6  -9  -4    8.64    0.96
   5  -9  -4    0.19    0.43
   5  -9  -4    0.33    0.31
   5  -9  -4    0.57    0.24
   5  -9  -4   -0.10    0.43
   5  -9  -4   -0.06    0.37
   4  -9  -4    0.22    0.35
   4  -9  -4    0.34    0.42
   4  -9  -4    0.02    0.35
   4  -9  -4    0.28    0.21
  -4  -9   4    0.65    0.25
   3  -9  -4   14.61    0.91
   3  -9  -4   17.92    1.20
   3  -9  -4   16.22    1.32
  -3  -9   4   17.21    0.90
   3  -9  -4   17.47    1.18
  -2  -9   4   19.39    0.92
  -2  -9   4   17.56    0.96
   2  -9  -4   18.48    1.39
   2  -9  -4   18.16    0.99
   2  -9  -4   17.68    1.23
   1  -9  -4    7.41    0.52
   1  -9  -4    8.51    0.88
   1  -9  -4    7.80    0.72
   0  -9  -4   51.14    2.47
   0  -9  -4   50.89    2.81
   0  -9  -4   49.46    3.11
  -1  -9  -4   11.33    0.70
   1  -9   4   12.41    1.15
  -1  -9  -4   11.17    0.89
  -1  -9  -4   11.10    1.03
   2  -9   4    6.68    0.88
  -2  -9  -4    6.25    0.77
  -2  -9  -4    6.72    0.53
   2  -9   4    6.43    0.41
  -2  -9  -4    6.93    0.68
  -3  -9  -4    2.16    0.44
   3  -9   4    1.83    0.58
   3  -9   4    1.54    0.22
  -3  -9  -4    1.38    0.27
   4  -9   4   22.46    1.23
   4  -9   4   18.92    1.67
  -4  -9  -4   19.90    1.17
  -4  -9  -4   22.00    1.47
  -5  -9  -4   23.86    1.64
  -5  -9  -4   28.37    1.47
   5  -9   4   29.03    1.83
  -6  -9  -4    5.51    0.70
  -6  -9  -4    7.37    0.59
  -7  -9  -4    4.16    0.65
  -7  -9  -4    3.69    0.39
  -7  -9  -4    3.10    0.58
  -8  -9  -4    1.50    0.48
  -8  -9  -4    0.99    0.43
  -9  -9  -4   -0.09    0.36
  -9  -9  -4    0.33    0.27
 -10  -9  -4    0.73    0.28
  10 -10  -4   18.86    1.09
  10 -10  -4   19.09    1.14
   9 -10  -4   16.68    1.10
   9 -10  -4   14.60    1.09
   9 -10  -4   16.33    1.05
   9 -10  -4   14.41    1.25
  -9 -10   4   15.49    0.93
  -8 -10   4    3.03    0.40
   8 -10  -4    4.09    0.59
   8 -10  -4    3.32    0.57
   8 -10  -4    2.83    0.72
   8 -10  -4    3.59    0.61
   8 -10  -4    4.41    0.52
   7 -10  -4    9.79    0.95
   7 -10  -4    9.13    1.02
   7 -10  -4    9.00    0.88
   7 -10  -4   10.25    0.86
   6 -10  -4    6.87    0.82
   6 -10  -4    6.94    0.70
   6 -10  -4    7.59    0.84
   6 -10  -4    5.50    0.68
   6 -10  -4    6.67    0.80
   5 -10  -4    8.88    0.77
   5 -10  -4    9.00    0.49
   5 -10  -4    9.29    0.85
   5 -10  -4    7.17    0.83
   5 -10  -4    8.81    0.50
   5 -10  -4    7.85    0.85
  -4 -10   4    0.21    0.26
   4 -10  -4    0.46    0.17
   4 -10  -4    0.38    0.28
   4 -10  -4    0.26    0.37
   4 -10  -4    0.30    0.35
   4 -10  -4    0.21    0.44
   4 -10  -4    0.18    0.17
   3 -10  -4   23.67    1.20
   3 -10  -4   21.78    1.53
   3 -10  -4   25.01    1.55
   3 -10  -4   24.05    1.75
  -3 -10   4   23.81    1.24
   3 -10  -4   24.08    1.19
  -2 -10   4   36.48    1.74
  -2 -10   4   32.54    1.84
   2 -10  -4   34.52    2.35
  -2 -10   4   35.68    2.45
   2 -10  -4   37.36    1.75
   2 -10  -4   35.63    2.08
   2 -10  -4   36.81    1.74
   1 -10  -4    2.69    0.27
   1 -10  -4    3.21    0.61
   1 -10  -4    2.12    0.39
   1 -10  -4    2.35    0.25
  -1 -10   4    2.00    0.63
   0 -10   4   26.71    1.96
   0 -10  -4   25.24    1.29
   0 -10  -4   25.51    1.57
   0 -10  -4   24.04    1.78
  -1 -10  -4   47.94    3.30
  -1 -10  -4   55.89    3.03
   1 -10   4   58.19    3.58
  -1 -10  -4   54.83    2.62
  -2 -10  -4    0.43    0.20
  -2 -10  -4    1.57    0.41
   2 -10   4    0.59    0.56
   2 -10   4    1.31    0.18
   3 -10   4    8.37    0.80
  -3 -10  -4    9.49    0.61
  -3 -10  -4   10.81    0.93
   3 -10   4    9.00    1.08
   3 -10   4    9.61    0.62
   4 -10   4    3.63    0.39
  -4 -10  -4    2.30    0.46
   4 -10   4    3.98    0.81
  -4 -10  -4    2.91    0.57
   4 -10   4    3.22    0.56
  -4 -10  -4    2.73    0.33
   4 -10   4    4.09    0.61
  -5 -10  -4   23.21    1.19
  -5 -10  -4   20.57    1.43
  -6 -10  -4    6.75    0.46
  -6 -10  -4    7.00    0.75
  -6 -10  -4    6.13    0.70
  -6 -10  -4    6.67    0.46
  -7 -10  -4    0.29    0.43
  -7 -10  -4    0.72    0.40
  -8 -10  -4    7.45    0.63
  -8 -10  -4    6.07    0.68
  -9 -10  -4    4.28    0.50
  10 -11  -4    6.36    0.49
  10 -11  -4    6.68    0.53
   9 -11  -4   42.83    2.26
   9 -11  -4   39.93    2.52
   9 -11  -4   42.85    2.16
   8 -11  -4   23.84    1.51
   8 -11  -4   24.30    1.77
   8 -11  -4   25.99    1.52
   7 -11  -4    5.63    0.67
   7 -11  -4    4.82    0.63
   7 -11  -4    5.53    0.64
   7 -11  -4    5.26    0.83
   6 -11  -4   22.43    1.37
   6 -11  -4   21.56    1.40
   6 -11  -4   20.71    1.44
   6 -11  -4   21.98    1.60
   6 -11  -4   19.96    1.58
   5 -11  -4   14.48    1.07
   5 -11  -4   13.06    1.23
   5 -11  -4   16.31    1.17
   5 -11  -4   15.15    1.03
   5 -11  -4   13.79    1.23
   4 -11  -4    9.83    0.93
   4 -11  -4    8.93    0.77
  -4 -11   4    8.99    0.66
   4 -11  -4   11.23    0.91
   4 -11  -4    9.37    0.84
   3 -11  -4    7.46    0.70
   3 -11  -4    7.31    0.65
  -3 -11   4    7.96    0.55
   3 -11  -4    7.57    0.70
   3 -11  -4    7.10    0.75
  -3 -11   4    8.74    0.76
   2 -11  -4   32.36    1.95
   2 -11  -4   32.01    1.92
  -2 -11   4   32.96    2.30
  -2 -11   4   31.70    1.59
  -2 -11   4   31.53    1.84
   1 -11  -4  108.42    5.91
  -1 -11   4  112.48    6.81
  -1 -11   4  113.91    5.27
   0 -11  -4   81.61    4.57
   0 -11   4   87.93    5.34
   0 -11   4   85.96    4.01
  -1 -11  -4   15.21    1.10
   1 -11   4   13.81    1.02
   1 -11   4   14.57    1.47
  -2 -11  -4   23.81    1.05
   2 -11   4   20.96    1.85
   2 -11   4   19.35    1.59
  -2 -11  -4   22.11    1.44
   2 -11   4   21.31    1.48
   2 -11   4   20.09    1.40
  -2 -11  -4   20.97    1.33
   2 -11   4   22.51    1.20
  -3 -11  -4    2.86    0.51
  -3 -11  -4    2.59    0.43
   3 -11   4    2.55    0.49
  -3 -11  -4    1.82    0.11
   3 -11   4    2.86    0.54
   3 -11   4    1.92    0.51
   3 -11   4    2.45    0.35
   3 -11   4    2.81    0.76
   3 -11   4    3.01    0.30
  -4 -11  -4    0.69    0.36
   4 -11   4    0.83    0.48
   4 -11   4    0.34    0.22
   4 -11   4    0.25    0.63
   4 -11   4    0.72    0.45
   4 -11   4    0.73    0.31
  -5 -11  -4    5.00    0.63
  -5 -11  -4    4.13    0.55
  -6 -11  -4   10.92    0.85
  -6 -11  -4   10.11    0.92
  -7 -11  -4    7.78    0.63
  -7 -11  -4    6.73    0.70
  -8 -11  -4   22.68    1.39
  -9 -11  -4   17.35    1.05
  -9 -12   4    1.47    0.38
   9 -12  -4    1.69    0.30
   9 -12  -4    0.58    0.43
   9 -12  -4    1.31    0.32
   8 -12  -4    6.35    0.84
   8 -12  -4    8.34    0.68
   8 -12  -4    7.65    0.62
   7 -12  -4    1.52    0.45
   7 -12  -4    0.99    0.40
   7 -12  -4    1.74    0.66
   6 -12  -4    1.46    0.63
   6 -12  -4    1.05    0.55
   6 -12  -4    1.77    0.43
   6 -12  -4    0.80    0.39
   5 -12  -4    0.33    0.50
   5 -12  -4    0.61    0.36
   5 -12  -4    0.60    0.54
   5 -12  -4    0.72    0.40
   4 -12  -4    1.54    0.44
   4 -12  -4    0.79    0.50
   4 -12  -4    1.32    0.38
   4 -12  -4    1.17    0.52
  -4 -12   4    1.44    0.49
  -4 -12   4    1.31    0.33
   3 -12  -4    5.64    0.77
  -3 -12   4    7.07    0.72
   3 -12  -4    6.23    0.71
   3 -12  -4    6.41    0.59
   3 -12  -4    5.78    0.62
   3 -12  -4    6.30    0.59
  -3 -12   4    5.83    0.50
  -2 -12   4   23.07    1.60
   2 -12  -4   23.64    1.62
   2 -12  -4   26.30    1.80
  -2 -12   4   25.47    1.58
  -2 -12   4   26.48    1.96
   2 -12  -4   25.24    1.54
  -2 -12   4   24.41    1.30
  -2 -12   4   26.84    1.79
   2 -12  -4   26.32    1.46
   2 -12  -4   25.18    1.55
   1 -12  -4    8.05    0.71
  -1 -12   4    8.05    0.75
  -1 -12   4    9.78    1.08
  -1 -12   4    6.60    0.48
  -1 -12   4    8.85    0.89
   1 -12  -4    8.70    0.74
   1 -12  -4    7.60    0.85
   1 -12  -4    7.92    0.66
  -1 -12   4    8.55    0.78
  -1 -12   4    6.98    0.47
   0 -12  -4   26.88    1.86
   0 -12   4   25.77    1.70
   0 -12  -4   25.00    1.53
   0 -12   4   28.18    1.91
   0 -12   4   27.09    1.63
   0 -12  -4   26.33    1.63
   0 -12   4   29.60    2.14
   0 -12   4   26.95    1.34
  -1 -12  -4    9.63    0.74
   1 -12   4    9.07    1.14
   1 -12   4    7.71    0.80
   1 -12   4    7.70    0.76
  -1 -12  -4    9.52    0.80
   1 -12   4    7.91    0.90
   1 -12   4    9.36    0.56
   2 -12   4    1.02    0.27
  -2 -12  -4    0.69    0.38
   2 -12   4    1.22    0.70
   2 -12   4    0.45    0.42
  -2 -12  -4    0.95    0.34
   2 -12   4    0.90    0.44
   2 -12   4    0.76    0.48
   2 -12   4    1.47    0.22
   3 -12   4   -0.04    0.42
  -3 -12  -4    0.29    0.34
   3 -12   4   -0.10    0.27
   3 -12   4   -0.07    0.64
   3 -12   4    0.35    0.19
   3 -12   4    0.34    0.47
  -3 -12  -4   -0.15    0.38
   4 -12   4   18.47    1.54
   4 -12   4   20.57    1.77
   4 -12   4   22.56    1.25
  -4 -12  -4   22.69    1.37
  -5 -12  -4    7.24    0.71
  -5 -12  -4    7.40    0.63
  -6 -12  -4    0.95    0.26
  -6 -12  -4    1.34    0.43
  -7 -12  -4    0.10    0.36
  -8 -12  -4   18.46    1.13
   9 -13  -4    6.90    0.68
  -9 -13   4    7.53    0.60
  -8 -13   4    1.11    0.42
   8 -13  -4    1.29    0.32
   8 -13  -4    1.02    0.28
   8 -13  -4    0.66    0.51
  -7 -13   4   -0.57    0.41
   7 -13  -4    0.06    0.35
   7 -13  -4   -0.29    0.55
   7 -13  -4    0.07    0.31
   6 -13  -4    3.98    0.68
   6 -13  -4    3.66    0.73
  -6 -13   4    4.37    0.64
   6 -13  -4    3.65    0.48
  -5 -13   4    9.53    0.90
   5 -13  -4   11.40    1.11
   5 -13  -4   13.82    1.16
   5 -13  -4   10.99    0.86
  -4 -13   4   11.40    0.79
  -4 -13   4   11.88    1.03
   4 -13  -4   11.88    1.13
   4 -13  -4   12.36    0.89
   4 -13  -4   11.69    1.15
   3 -13  -4   -0.15    0.49
  -3 -13   4    0.65    0.45
  -3 -13   4    0.11    0.26
   3 -13  -4    0.15    0.47
   3 -13  -4    0.27    0.32
  -2 -13   4    5.84    0.44
   2 -13  -4    4.97    0.65
   2 -13  -4    5.64    0.55
  -2 -13   4    4.93    0.65
  -2 -13   4    6.91    0.78
   2 -13  -4    4.57    0.73
  -1 -13   4    2.05    0.56
  -1 -13   4    1.80    0.47
   1 -13  -4    2.02    0.38
  -1 -13   4    1.26    0.45
   1 -13  -4    1.98    0.56
  -1 -13   4    1.98    0.29
   1 -13  -4    1.83    0.39
  -1 -13   4    1.44    0.67
   0 -13  -4    3.92    0.48
   0 -13   4    5.20    0.64
   0 -13  -4    3.41    0.61
   0 -13   4    4.61    0.72
   0 -13  -4    4.16    0.50
   0 -13   4    4.44    0.88
   0 -13   4    4.61    0.38
   0 -13   4    4.79    0.63
   1 -13   4    5.75    0.68
   1 -13   4    5.20    0.76
   1 -13   4    5.59    0.68
  -1 -13  -4    6.04    0.57
   1 -13   4    4.69    0.88
  -1 -13  -4    6.43    0.60
   1 -13   4    4.81    0.44
   1 -13   4    5.32    0.41
  -2 -13  -4    1.75    0.40
   2 -13   4    0.66    0.44
   2 -13   4    1.41    0.30
   2 -13   4    0.81    0.46
   2 -13   4    1.10    0.22
   2 -13   4    1.42    0.70
   2 -13   4    1.40    0.54
  -2 -13  -4    1.62    0.38
   3 -13   4    0.98    0.52
   3 -13   4    0.03    0.27
  -3 -13  -4    0.83    0.35
   3 -13   4    0.61    0.66
   3 -13   4    0.07    0.44
   3 -13   4    0.77    0.22
  -4 -13  -4   20.95    1.27
   4 -13   4   21.24    1.18
   4 -13   4   19.72    1.51
   4 -13   4   19.01    1.70
   4 -13   4   17.73    1.12
   5 -13   4   24.45    1.79
  -5 -13  -4   28.62    1.59
  -6 -13  -4    9.42    0.77
  -7 -13  -4    9.80    0.74
  -8 -13  -4    0.41    0.23
  -8 -14   4    8.66    0.71
   8 -14  -4    9.39    0.80
  -7 -14   4    0.19    0.39
   7 -14  -4    0.97    0.54
   7 -14  -4    0.35    0.28
   6 -14  -4    5.75    0.52
   6 -14  -4    5.40    0.77
  -6 -14   4    5.25    0.65
   6 -14  -4    4.88    0.73
   5 -14  -4    1.72    0.60
   5 -14  -4    2.04    0.38
  -5 -14   4    1.77    0.53
   5 -14  -4    2.11    0.61
   4 -14  -4    3.47    0.64
   4 -14  -4    2.13    0.64
  -4 -14   4    3.33    0.41
  -4 -14   4    2.26    0.54
   4 -14  -4    3.68    0.44
   3 -14  -4    7.92    0.69
  -3 -14   4    7.78    0.59
   3 -14  -4    8.03    0.95
  -3 -14   4   10.83    0.89
   3 -14  -4    8.48    0.87
  -2 -14   4   -0.33    0.41
  -2 -14   4    0.03    0.23
   2 -14  -4    0.34    0.30
  -2 -14   4   -0.15    0.44
   2 -14  -4    0.89    0.55
  -1 -14   4    4.02    0.59
   1 -14  -4    6.48    0.81
   1 -14  -4    6.18    0.54
  -1 -14   4    5.01    0.65
  -1 -14   4    5.23    0.42
  -1 -14   4    5.17    0.75
   0 -14   4    8.11    0.54
   0 -14  -4    8.63    0.91
   0 -14   4    7.57    1.08
   0 -14   4    9.77    0.85
   0 -14   4    8.60    0.81
   0 -14  -4    9.05    0.70
   0 -14   4    6.83    0.87
   1 -14   4    0.54    0.46
   1 -14   4    1.02    0.27
   1 -14   4    0.84    0.71
   1 -14   4    0.82    0.45
  -1 -14  -4    1.32    0.34
   1 -14   4    1.03    0.22
   1 -14   4    1.03    0.56
   2 -14   4   10.65    0.68
   2 -14   4   12.16    0.98
   2 -14   4   10.82    0.69
  -2 -14  -4   11.58    0.82
   2 -14   4    8.44    1.15
   2 -14   4   11.34    1.13
   3 -14   4    0.25    0.27
   3 -14   4    0.34    0.19
   3 -14   4    0.02    0.49
  -3 -14  -4    0.27    0.32
   3 -14   4    0.28    0.44
   3 -14   4   -0.10    0.64
   4 -14   4    2.97    0.35
  -4 -14  -4    3.04    0.43
   4 -14   4    3.01    0.41
   4 -14   4    3.45    0.61
  -5 -14  -4    0.96    0.33
   5 -14   4    0.57    0.44
  -6 -14  -4   -0.19    0.26
  -7 -14  -4    1.93    0.29
   7 -15  -4    5.18    0.60
  -7 -15   4    3.94    0.47
   6 -15  -4    1.19    0.49
  -6 -15   4    2.01    0.46
   6 -15  -4    2.41    0.56
   5 -15  -4    0.73    0.54
   5 -15  -4    0.98    0.54
  -5 -15   4    1.12    0.46
   5 -15  -4    0.74    0.27
   4 -15  -4    0.90    0.51
  -4 -15   4    0.66    0.45
   4 -15  -4    0.45    0.27
   4 -15  -4    0.57    0.55
   3 -15  -4   14.62    1.31
  -3 -15   4   14.93    1.08
   3 -15  -4   14.62    1.14
   3 -15  -4   14.09    0.90
  -3 -15   4   13.20    0.84
  -2 -15   4    7.81    0.82
  -2 -15   4    5.22    0.65
  -2 -15   4    6.05    0.48
   2 -15  -4    5.07    0.50
   2 -15  -4    6.97    0.87
  -1 -15   4    0.91    0.40
   1 -15  -4    0.38    0.54
   1 -15  -4    0.89    0.29
  -1 -15   4    0.58    0.46
  -1 -15   4    0.69    0.24
  -1 -15   4    0.30    0.52
   0 -15   4    0.65    0.54
   0 -15   4    0.62    0.24
   0 -15  -4    0.24    0.26
   0 -15   4    0.83    0.46
   0 -15  -4    0.47    0.52
   0 -15   4    0.24    0.17
   1 -15   4    2.10    0.30
   1 -15   4    2.67    0.63
  -1 -15  -4    2.52    0.37
   1 -15   4    2.25    0.27
   1 -15   4    1.95    0.52
   2 -15   4    7.25    0.55
   2 -15   4    7.86    0.90
   2 -15   4    8.01    0.55
   2 -15   4    9.10    0.78
  -2 -15  -4    8.73    0.66
   3 -15   4    1.74    0.32
  -3 -15  -4    1.84    0.34
   3 -15   4    2.03    0.27
   3 -15   4    2.34    0.59
   4 -15   4    0.34    0.25
  -4 -15  -4    0.17    0.27
   4 -15   4    0.29    0.17
   4 -15   4    0.02    0.42
   5 -15   4    1.57    0.43
  -5 -15  -4    1.82    0.31
  -6 -15  -4    0.30    0.20
   6 -16  -4    6.96    0.70
  -6 -16   4    5.80    0.55
   6 -16  -4    7.73    0.69
  -5 -16   4    1.08    0.38
   5 -16  -4    0.95    0.46
   5 -16  -4    0.52    0.46
  -4 -16   4   -0.49    0.35
   4 -16  -4   -0.18    0.49
   4 -16  -4    0.18    0.45
  -3 -16   4   17.29    1.05
  -3 -16   4   20.92    1.26
   3 -16  -4   20.47    1.51
  -2 -16   4   27.40    1.54
  -2 -16   4   29.87    1.77
   2 -16  -4   36.27    2.16
   1 -16  -4   14.75    1.24
  -1 -16   4   12.63    0.77
  -1 -16   4   15.54    1.19
  -1 -16   4   13.98    1.02
  -1 -16   4   13.15    0.79
   0 -16   4    2.76    0.61
   0 -16   4    2.19    0.49
   0 -16   4    2.23    0.29
   0 -16  -4    2.75    0.33
   0 -16  -4    3.35    0.62
   0 -16   4    2.58    0.28
   1 -16   4   30.01    1.93
   1 -16   4   25.67    1.39
   1 -16   4   27.36    1.63
  -1 -16  -4   28.05    1.47
   1 -16   4   26.62    1.46
   2 -16   4    1.99    0.28
   2 -16   4    3.22    0.62
  -2 -16  -4    2.76    0.32
   2 -16   4    2.42    0.26
   2 -16   4    2.47    0.46
   3 -16   4    0.43    0.17
  -3 -16  -4    0.68    0.24
   3 -16   4    0.38    0.22
   3 -16   4    0.11    0.44
   4 -16   4    2.35    0.49
   5 -16   4   12.69    0.94
   5 -17  -4   23.32    1.37
  -5 -17   4   22.36    1.27
   5 -17  -4   21.08    1.50
   4 -17  -4   23.83    1.60
  -4 -17   4   22.13    1.33
   3 -17  -4    4.26    0.64
  -3 -17   4    3.42    0.47
  -2 -17   4   10.12    0.76
   2 -17  -4    9.77    0.94
  -2 -17   4    8.04    0.54
  -1 -17   4   15.05    0.88
  -1 -17   4   15.45    0.91
   1 -17  -4   19.47    1.32
  -1 -17   4   16.82    1.09
  -1 -17   4   18.48    1.27
   0 -17   4   13.04    0.90
   0 -17   4   11.40    0.69
   0 -17   4   11.45    0.67
   0 -17   4   14.23    1.06
   1 -17   4   -0.14    0.33
   1 -17   4   -0.09    0.12
   1 -17   4    0.40    0.44
   2 -17   4    0.86    0.17
   2 -17   4    1.10    0.44
   3 -17   4   13.51    1.04
   4 -17   4    2.93    0.43
   4 -18  -4    0.29    0.33
  -4 -18   4    0.30    0.24
   3 -18  -4   35.31    2.14
  -3 -18   4   31.67    1.78
   2 -18  -4    0.56    0.38
  -2 -18   4    0.27    0.28
  -1 -18   4    2.19    0.42
  -1 -18   4    1.50    0.34
   1 -18  -4    2.69    0.46
   0 -18   4    0.10    0.28
   0 -18   4    0.13    0.35
   1 -18   4    1.24    0.40
   2 -18   4   16.30    1.15
   3 -18   4    0.94    0.33
 -12   0   5   -0.10    0.28
 -11   0   5    0.12    0.41
 -11   0   5    0.12    0.22
 -11   0   5    0.14    0.38
 -11   0   5   -0.27    0.37
 -10   0   5   -0.42    0.43
 -10   0   5    0.16    0.30
 -10   0   5    0.38    0.53
 -10   0   5   -0.23    0.40
  -9   0   5    0.51    0.47
  -9   0   5   -0.05    0.54
  -9   0   5    0.47    0.42
  -9   0   5    0.13    0.51
  -8   0   5    0.50    0.49
  -8   0   5    0.43    0.47
  -8   0   5    0.03    0.36
  -8   0   5    0.28    0.41
  -7   0   5   -0.15    0.36
  -7   0   5   -0.07    0.33
  -7   0   5   -0.22    0.37
  -6   0   5    0.08    0.27
  -6   0   5   -0.11    0.27
  -5   0   5   -0.46    0.45
  -5   0   5   -0.27    0.21
  -4   0   5    0.01    0.42
  -3   0   5    0.28    0.35
  -2   0   5    0.04    0.31
  -1   0   5   -0.08    0.28
  -1   0   5   -0.14    0.16
   1   0  -5    0.45    0.37
   0   0   5   -0.05    0.19
   0   0   5   -0.20    0.28
   0   0  -5    0.21    0.32
   1   0   5   -0.04    0.31
   2   0   5   -0.11    0.31
   3   0   5    0.28    0.42
   4   0   5    0.15    0.22
   4   0   5   -0.03    0.50
   5   0   5    0.26    0.32
   5   0   5   -0.01    0.28
   6   0   5   -0.11    0.24
   6   0   5   -0.02    0.39
   6   0   5   -0.13    0.36
   7   0   5   -0.66    0.33
   7   0   5    0.45    0.30
   7   0   5   -0.07    0.37
   7   0   5   -0.04    0.45
   7   0   5    0.80    0.46
   8   0   5    0.24    0.29
   8   0   5    0.38    0.42
   8   0   5    0.24    0.46
   8   0   5    0.12    0.45
   8   0   5   -0.23    0.49
   9   0   5   -0.33    0.20
   9   0   5    0.47    0.47
   9   0   5   -0.25    0.48
   9   0   5    0.01    0.20
   9   0   5   -0.46    0.38
   9   0   5    0.12    0.41
  10   0   5   -0.24    0.38
  10   0   5   -0.04    0.38
  10   0   5    0.15    0.37
  11   0   5   -0.05    0.27
  11   0   5   -0.25    0.25
 -12  -1   5    1.34    0.34
 -12   1   5    0.45    0.29
  11  -1  -5    6.03    0.86
 -11  -1   5    5.28    0.62
 -11  -1   5    5.05    0.61
 -11   1   5    4.84    0.64
 -11   1   5    5.93    0.63
 -11   1   5    4.40    0.46
  10  -1  -5    5.33    0.89
  10  -1  -5    3.20    0.81
 -10  -1   5    3.89    0.65
 -10  -1   5    4.67    0.72
 -10  -1   5    5.81    0.52
 -10  -1   5    5.60    0.68
 -10   1   5    4.54    0.69
 -10   1   5    5.54    0.82
 -10   1   5    6.74    0.73
  -9  -1   5    0.80    0.57
   9  -1  -5    0.68    0.62
  -9  -1   5    0.57    0.47
  -9  -1   5    1.05    0.46
  -9  -1   5    0.29    0.51
  -9  -1   5    0.16    0.29
   9  -1  -5    0.15    0.60
  -9   1   5    1.55    0.61
  -9   1   5    0.33    0.48
  -9   1   5    0.87    0.45
  -9   1   5    1.37    0.60
   8  -1  -5   40.57    2.63
  -8  -1   5   38.43    2.21
  -8  -1   5   40.41    2.51
  -8  -1   5   42.58    2.36
  -8  -1   5   38.23    2.32
  -8   1   5   36.19    2.54
  -8   1   5   41.64    2.38
  -8   1   5   37.77    2.36
  -8   1   5   34.66    2.20
  -7  -1   5   45.56    2.62
  -7  -1   5   48.15    2.67
  -7  -1   5   44.64    2.81
  -7   1   5   47.16    2.67
  -7   1   5   48.73    2.68
  -7   1   5   42.15    2.83
  -6  -1   5   13.07    0.93
  -6  -1   5   14.38    1.03
  -6   1   5   12.23    1.05
  -6   1   5   12.42    0.95
  -5  -1   5    3.92    0.47
  -5  -1   5    3.16    0.83
  -5   1   5    3.93    0.51
  -4  -1   5   44.36    3.46
  -4   1   5   47.86    3.59
  -3  -1   5   31.46    2.52
  -3   1   5   35.24    2.68
  -2  -1   5   30.81    2.36
  -2   1   5   32.57    2.51
  -1  -1   5  184.71   12.65
  -1  -1   5  216.88   12.71
   1  -1  -5  190.56   12.74
  -1   1   5  185.44   12.77
   1   1  -5  189.08   12.63
   0  -1   5  173.19   10.10
   0  -1  -5  150.08   10.10
   0  -1   5  147.72   10.01
   0   1  -5  142.91    9.95
   0   1   5  147.04   10.14
   1  -1   5   70.10    4.76
   1   1   5   67.69    4.88
   2  -1   5  125.43    8.46
   2   1   5  124.91    8.57
   2   1   5  127.81    6.48
   3  -1   5   53.30    3.78
   3   1   5   47.55    3.81
   4  -1   5   69.29    5.33
   4  -1   5   74.90    4.11
   4   1   5   75.55    5.49
   4   1   5   73.49    4.16
   5  -1   5   70.43    3.33
   5  -1   5   70.56    3.92
   5  -1   5   66.07    3.76
   5   1   5   66.43    3.95
   5   1   5   70.48    3.82
   6  -1   5    0.24    0.37
   6  -1   5    0.30    0.37
   6  -1   5    0.44    0.24
   6   1   5    0.37    0.40
   6   1   5   -0.04    0.41
   7  -1   5   24.34    1.40
   7  -1   5   27.85    1.76
   7  -1   5   27.94    1.77
   7  -1   5   25.67    1.57
   7  -1   5   26.49    1.55
   7   1   5   27.68    1.84
   7   1   5   25.93    1.57
   7   1   5   23.66    1.60
   7   1   5   27.19    1.85
   8  -1   5   -0.33    0.42
   8  -1   5    0.17    0.22
   8  -1   5    0.20    0.43
   8  -1   5    0.37    0.40
   8  -1   5   -0.29    0.46
   8  -1   5    0.21    0.24
   8   1   5    0.29    0.34
   8   1   5    0.64    0.52
   8   1   5    0.11    0.45
   8   1   5    0.93    0.44
   8   1   5   -0.20    0.53
  -9  -1  -5    4.23    0.41
   9  -1   5    3.76    0.58
   9  -1   5    5.16    0.62
   9  -1   5    4.58    0.69
   9  -1   5    3.19    0.55
   9   1   5    4.94    0.64
   9   1   5    2.95    0.61
   9   1   5    4.37    0.65
   9   1   5    2.56    0.67
   9   1   5    3.93    0.44
  10  -1   5    1.81    0.43
  10  -1   5    1.14    0.42
  10  -1   5    1.75    0.42
  10   1   5    3.32    0.52
  10   1   5    1.52    0.45
  10   1   5    1.21    0.47
  11  -1   5   17.88    1.01
  11  -1   5   17.37    1.05
  11   1   5   17.20    1.07
  11   1   5   18.44    1.04
  12  -2  -5    0.81    0.34
 -12  -2   5    0.89    0.30
 -12   2   5    0.79    0.29
 -11  -2   5    0.73    0.35
  11  -2  -5   -0.77    0.40
 -11  -2   5   -0.29    0.35
  11  -2  -5   -0.02    0.53
 -11   2   5    0.53    0.40
 -11   2   5   -0.62    0.36
 -10  -2   5    8.98    0.57
  10  -2  -5    8.96    1.12
 -10  -2   5    7.81    0.87
  10  -2  -5    8.57    1.03
 -10  -2   5    7.98    0.82
 -10  -2   5    9.93    0.56
 -10  -2   5    9.38    0.85
  10  -2  -5    8.88    0.91
 -10   2   5    6.56    0.84
 -10   2   5   10.73    0.89
 -10   2   5    7.97    1.00
  -9  -2   5   33.04    2.06
   9  -2  -5   35.02    2.47
  -9  -2   5   37.16    2.32
   9  -2  -5   36.85    2.10
  -9  -2   5   34.31    2.16
   9  -2  -5   34.09    2.41
  -9  -2   5   36.92    1.84
  -9   2   5   36.55    2.11
  -9   2   5   36.53    2.46
  -9   2   5   34.21    2.21
  -9   2   5   35.83    2.26
   8  -2  -5  108.53    5.94
  -8  -2   5  108.75    5.76
   8  -2  -5  113.98    6.20
  -8  -2   5  107.53    5.71
   8  -2  -5  102.15    5.32
  -8  -2   5  108.61    5.10
  -8  -2   5  103.39    5.47
  -8   2   5  103.88    5.50
  -8   2   5  103.62    6.15
  -8   2   5  106.67    5.80
  -8   2   5  105.81    5.76
   7  -2  -5   17.96    1.45
  -7  -2   5   17.05    1.21
  -7  -2   5   19.26    1.03
  -7  -2   5   18.25    1.33
   7  -2  -5   18.84    1.45
  -7  -2   5   18.58    1.27
  -7   2   5   16.53    1.41
  -7   2   5   16.07    1.23
  -7   2   5   16.79    1.29
  -6  -2   5   63.15    3.32
  -6  -2   5   59.61    3.51
  -6  -2   5   60.99    2.95
   6  -2  -5   63.79    3.65
  -6   2   5   59.80    3.38
  -6   2   5   58.66    3.60
   5  -2  -5   92.09    5.24
  -5  -2   5   99.27    6.59
  -5  -2   5   97.87    5.16
  -5   2   5   82.93    5.21
  -4  -2   5   72.35    5.16
  -4   2   5   73.86    5.37
  -3  -2   5   88.74    6.26
  -3   2   5   96.22    6.50
  -2  -2   5    4.77    0.66
   2  -2  -5    5.42    0.85
  -2   2   5    5.38    0.87
  -1  -2   5  126.90    8.49
  -1  -2   5  141.16    8.52
   1  -2  -5  126.45    8.68
  -1   2   5  119.00    8.72
   0  -2   5    5.20    0.66
   0  -2  -5    4.70    0.80
   0  -2   5    6.19    0.74
   0   2   5    5.75    0.90
   1  -2   5  170.24   11.09
   1   2   5  167.78   11.35
   2  -2   5  270.08   17.17
   2   2   5  255.61   13.06
   3  -2   5   12.40    1.29
   3   2   5   13.44    1.49
   4  -2   5   70.61    3.93
   4   2   5   70.28    4.01
   5  -2   5    2.26    0.26
   5  -2   5    2.75    0.28
   5  -2   5    2.39    0.42
   5  -2   5    1.62    0.35
   5   2   5    2.31    0.51
   5   2   5    1.98    0.45
   6  -2   5   12.21    0.72
   6  -2   5   11.80    1.00
   6  -2   5   11.73    0.99
   6  -2   5   13.93    0.73
   6   2   5   12.29    1.12
   6   2   5   10.56    1.08
   7  -2   5    5.79    0.69
   7  -2   5    7.02    0.46
   7  -2   5    6.82    0.75
   7  -2   5    6.44    0.45
   7  -2   5    4.61    0.58
   7  -2   5    6.77    0.66
   7   2   5    4.76    0.79
   7   2   5    6.36    0.73
   7   2   5    7.52    0.77
   7   2   5    5.34    0.77
  -8  -2  -5   14.78    0.98
   8  -2   5   13.69    1.09
   8  -2   5   14.40    1.05
   8  -2   5   14.94    1.19
   8  -2   5   13.90    1.13
   8   2   5   14.76    1.13
   8   2   5   14.45    1.13
   8   2   5   13.62    1.29
   9  -2   5    0.36    0.41
   9  -2   5    0.46    0.35
   9  -2   5    1.23    0.49
   9  -2   5    0.56    0.42
   9   2   5    0.78    0.47
   9   2   5    0.35    0.34
   9   2   5    0.46    0.45
   9   2   5    0.49    0.56
   9   2   5    0.74    0.52
  10  -2   5   13.77    0.90
  10  -2   5   13.14    0.93
  10  -2   5   11.85    0.91
  10   2   5   11.80    1.08
  10   2   5   12.80    0.95
 -10   2  -5   13.04    0.83
  10   2   5   12.54    0.97
  11  -2   5    0.41    0.25
  11  -2   5    0.76    0.26
  11   2   5    0.43    0.27
  11   2   5    0.42    0.28
  12  -3  -5   11.68    0.81
 -12  -3   5   12.20    0.80
 -11  -3   5    0.80    0.39
  11  -3  -5    1.66    0.60
  11  -3  -5    1.38    0.49
 -11  -3   5    1.04    0.32
 -11   3   5    0.75    0.46
  10  -3  -5    4.42    0.80
 -10  -3   5    3.48    0.57
  10  -3  -5    3.04    0.79
 -10  -3   5    2.81    0.51
 -10  -3   5    3.27    0.53
  10  -3  -5    3.21    0.65
 -10   3   5    2.66    0.62
 -10   3   5    3.20    0.53
 -10   3   5    3.52    0.76
  -9  -3   5    2.73    0.30
   9  -3  -5    2.49    0.69
   9  -3  -5    2.25    0.62
  -9  -3   5    2.57    0.53
  -9  -3   5    3.48    0.61
  -9  -3   5    2.87    0.29
   9  -3  -5    1.34    0.70
  -9  -3   5    2.40    0.51
  -9   3   5    2.65    0.54
  -9   3   5    2.43    0.65
  -9   3   5    3.52    0.78
  -9   3   5    1.41    0.60
   8  -3  -5   16.06    1.48
   8  -3  -5   16.55    1.28
  -8  -3   5   18.70    1.25
  -8  -3   5   17.74    0.99
  -8  -3   5   16.64    1.18
  -8  -3   5   18.13    1.34
   8  -3  -5   17.01    1.52
  -8  -3   5   17.92    1.28
  -8   3   5   18.52    1.25
  -8   3   5   18.34    1.54
  -8   3   5   17.18    1.29
  -7  -3   5  146.84    8.02
  -7  -3   5  158.25    7.97
   7  -3  -5  153.87    8.53
  -7  -3   5  155.86    8.40
  -7  -3   5  151.87    7.13
   7  -3  -5  150.99    8.18
  -7   3   5  156.30    8.57
  -7   3   5  143.63    8.04
  -6  -3   5    2.48    0.27
   6  -3  -5    2.49    0.53
   6  -3  -5    1.41    0.48
  -6  -3   5    2.16    0.40
  -6  -3   5    2.16    0.35
  -6   3   5    2.02    0.51
  -5  -3   5   22.42    1.44
  -5  -3   5   23.45    1.15
   5  -3  -5   23.01    1.58
  -5  -3   5   24.51    1.35
  -5   3   5   22.23    1.56
  -4  -3   5    1.36    0.50
  -3  -3   5    1.11    0.41
  -3   3   5    0.93    0.58
   2  -3  -5   36.71    2.83
  -2  -3   5   37.52    2.57
  -2   3   5   32.46    2.84
  -1  -3   5   37.74    2.77
   1  -3  -5   40.56    3.09
  -1  -3   5   43.12    2.79
  -1   3   5   37.88    3.11
   0  -3   5  660.68   41.75
   0  -3   5  697.83   41.78
   0   3   5  591.82   42.08
   1  -3   5    9.58    0.85
   1   3   5    8.60    1.23
   2  -3   5    8.07    0.87
   2   3   5    8.58    1.25
   3  -3   5  120.29    7.80
   3   3   5  109.87    6.35
  -4  -3  -5    5.82    0.69
   4  -3   5    5.42    0.49
   4   3   5    4.84    0.60
   5  -3   5   -0.02    0.26
  -5  -3  -5    0.25    0.40
  -5  -3  -5   -0.05    0.31
   5  -3   5   -0.11    0.22
   5   3   5    0.18    0.40
   5   3   5   -0.15    0.32
   6  -3   5   96.17    5.40
   6  -3   5  103.53    5.21
   6  -3   5   91.21    4.74
   6   3   5   94.35    4.85
   6   3   5   96.35    5.39
   6   3   5  102.91    5.59
   7  -3   5    2.13    0.43
   7  -3   5    1.85    0.42
   7  -3   5    1.03    0.43
   7  -3   5    2.08    0.44
  -7  -3  -5    2.70    0.67
   7   3   5    1.97    0.50
   7   3   5    2.23    0.54
   7   3   5    0.70    0.60
   7   3   5    2.51    0.64
   8  -3   5    7.98    0.71
   8  -3   5    8.73    0.77
   8  -3   5    7.64    0.73
  -8  -3  -5    7.37    0.61
  -8  -3  -5    7.45    1.01
   8  -3   5    9.44    0.83
   8   3   5    6.78    0.91
   8   3   5    9.59    1.08
   8   3   5    8.40    0.88
   8   3   5    9.37    0.90
   9  -3   5   10.48    0.85
   9  -3   5   10.98    0.81
   9  -3   5   10.73    0.87
   9   3   5    8.23    0.84
   9   3   5    7.82    0.91
   9   3   5    8.10    0.81
   9   3   5    7.85    0.96
  10  -3   5    6.03    0.56
  10  -3   5    5.20    0.54
 -10   3  -5    6.53    0.58
  10   3   5    6.53    0.66
  10   3   5    6.12    0.65
  10   3   5    5.90    0.46
  10   3   5    3.49    0.64
  11  -3   5    2.00    0.29
  11  -3   5    2.09    0.30
  11   3   5    3.28    0.40
  11   3   5    2.44    0.38
 -12  -4   5    5.66    0.49
  11  -4  -5    0.45    0.44
  11  -4  -5    1.28    0.48
  11  -4  -5    0.28    0.50
  11  -4  -5    0.39    0.29
 -11  -4   5    0.56    0.36
 -10  -4   5    8.55    0.75
  10  -4  -5   11.84    0.99
 -10  -4   5    8.33    0.81
  10  -4  -5    8.87    0.92
  10  -4  -5    9.26    1.03
  10  -4  -5    8.65    1.05
 -10  -4   5    8.34    0.76
 -10   4   5    5.97    0.96
   9  -4  -5    0.68    0.65
  -9  -4   5    1.43    0.47
   9  -4  -5    1.34    0.61
  -9  -4   5    1.54    0.45
   9  -4  -5    1.20    0.56
   9  -4  -5    1.17    0.59
  -9  -4   5    0.49    0.41
  -9   4   5    1.26    0.55
  -9   4   5    0.71    0.62
   8  -4  -5    9.58    1.07
   8  -4  -5    7.97    0.87
   8  -4  -5    8.77    1.04
   8  -4  -5    8.28    0.90
  -8  -4   5    9.52    0.84
  -8  -4   5    6.91    0.69
  -8  -4   5    5.84    0.66
  -8   4   5    6.43    0.92
  -8   4   5    9.27    0.87
  -7  -4   5   10.33    0.53
  -7  -4   5    9.90    0.53
  -7  -4   5    9.91    0.81
  -7  -4   5   10.02    0.87
   7  -4  -5    8.35    0.99
  -7  -4   5    9.44    0.78
   7  -4  -5    8.49    0.97
  -7   4   5   10.25    1.12
  -7   4   5   10.05    0.93
  -6  -4   5   30.09    1.45
   6  -4  -5   27.16    1.95
  -6  -4   5   32.10    1.45
  -6  -4   5   32.86    1.75
   6  -4  -5   30.54    2.03
  -6  -4   5   29.65    1.85
  -6   4   5   30.00    2.06
  -5  -4   5    2.84    0.33
  -5  -4   5    2.88    0.35
   5  -4  -5    3.17    0.52
  -5   4   5    3.25    0.55
   4  -4  -5    8.01    0.78
  -4  -4   5    6.94    0.96
  -3  -4   5   18.35    1.50
   2  -4  -5   10.81    1.31
  -2  -4   5    7.90    0.79
  -2   4   5    8.67    1.28
  -1  -4   5   41.30    2.72
  -1  -4   5   38.51    2.69
   1  -4  -5   41.06    3.15
  -1   4   5   37.21    3.13
   0  -4  -5   26.57    2.48
   0  -4   5   30.28    2.09
   0  -4   5   33.50    2.12
   0   4   5   28.43    2.52
   1  -4   5  173.29   10.72
   1   4   5  153.67   11.15
   2  -4   5    1.56    0.41
   3  -4   5    1.42    0.50
   3   4   5    1.75    0.37
   4   4   5    8.52    0.82
   5  -4   5    6.54    0.60
  -5  -4  -5    8.19    0.89
   5  -4   5    7.50    0.60
  -5  -4  -5    7.07    0.86
   5   4   5    9.06    0.94
   5   4   5    6.29    0.76
   6  -4   5   63.30    3.48
   6  -4   5   62.17    3.10
   6  -4   5   61.87    3.22
   6  -4   5   61.59    3.38
   6   4   5   63.74    3.65
   6   4   5   61.33    3.24
   6   4   5   58.91    3.71
   7  -4   5   -0.11    0.32
   7  -4   5    0.73    0.34
   7  -4   5   -0.10    0.27
   7  -4   5    0.50    0.37
  -7  -4  -5    0.05    0.22
   7   4   5    1.18    0.56
   7   4   5    0.62    0.58
   7   4   5    0.18    0.42
   7   4   5    0.60    0.48
   8  -4   5   18.10    1.31
   8  -4   5   21.13    1.25
   8  -4   5   20.15    1.29
   8   4   5   20.35    1.41
   8   4   5   20.61    1.42
   8   4   5   20.18    1.65
   8   4   5   19.56    1.60
   9  -4   5   19.21    1.18
   9  -4   5   17.35    1.11
   9   4   5   16.13    1.44
   9   4   5   18.57    1.28
   9   4   5   18.91    1.29
   9   4   5   17.70    1.43
  10  -4   5    2.14    0.38
  10  -4   5    2.55    0.38
  10   4   5    2.31    0.56
  10   4   5    1.58    0.46
  10   4   5    2.31    0.49
 -12  -5   5    3.62    0.35
  11  -5  -5   26.53    1.44
 -11  -5   5   31.56    1.65
  11  -5  -5   31.60    1.75
  11  -5  -5   27.58    1.88
  11  -5  -5   30.44    1.67
 -10  -5   5    5.16    0.58
  10  -5  -5    5.40    0.80
  10  -5  -5    5.16    0.72
  10  -5  -5    3.25    0.75
  10  -5  -5    5.99    0.74
 -10   5   5    5.96    0.90
   9  -5  -5    3.48    0.77
  -9  -5   5    3.51    0.53
  -9  -5   5    3.98    0.49
   9  -5  -5    3.66    0.70
   9  -5  -5    4.16    0.86
  -9  -5   5    4.77    0.56
   9  -5  -5    4.78    0.73
  -9   5   5    4.54    0.66
  -9   5   5    3.91    0.84
   8  -5  -5    5.38    0.82
   8  -5  -5    4.45    0.66
   8  -5  -5    5.05    0.70
   8  -5  -5    4.11    0.82
  -8  -5   5    5.28    0.54
  -8  -5   5    4.58    0.54
  -8  -5   5    5.11    0.61
  -8   5   5    4.07    0.85
  -8   5   5    4.62    0.66
   7  -5  -5   21.26    1.62
   7  -5  -5   20.61    1.42
   7  -5  -5   21.49    1.61
  -7  -5   5   21.93    1.30
  -7  -5   5   21.44    1.29
  -7  -5   5   20.81    1.38
  -7   5   5   21.42    1.69
  -7   5   5   20.02    1.43
  -6  -5   5    1.46    0.31
  -6  -5   5    2.64    0.32
   6  -5  -5    1.49    0.52
   6  -5  -5    1.67    0.49
  -6   5   5    1.15    0.48
   5  -5  -5   33.24    2.12
  -5  -5   5   32.51    1.89
  -5  -5   5   34.15    1.78
   5  -5  -5   31.93    2.06
  -5   5   5   33.31    2.16
   4  -5  -5   72.88    3.71
   4  -5  -5   61.27    3.61
  -4   5   5   53.68    3.63
  -3  -5   5    8.31    0.85
  -2  -5   5    5.72    0.58
   2  -5  -5    3.79    0.90
  -1  -5   5   83.93    5.32
  -1  -5   5   80.20    5.32
   1  -5  -5   81.41    5.89
   0  -5  -5    6.31    1.08
   1  -5   5    0.17    0.20
   2  -5   5    0.12    0.28
   3   5   5   75.98    4.36
  -4  -5  -5    3.86    0.58
   4   5   5    3.93    0.57
  -5  -5  -5    1.87    0.56
   5   5   5    1.54    0.52
   5   5   5    2.17    0.52
   6  -5   5    0.27    0.29
  -6  -5  -5    0.46    0.20
   6  -5   5    0.21    0.28
   6  -5   5    0.00    0.26
   6   5   5   -0.34    0.45
   6   5   5    0.16    0.47
   6   5   5    0.12    0.40
   7  -5   5   75.47    3.71
   7  -5   5   75.60    3.86
   7   5   5   76.89    4.39
   7   5   5   71.61    3.85
   7   5   5   74.62    4.48
   8  -5   5   11.37    0.88
  -8  -5  -5   11.97    1.14
   8  -5   5   11.92    0.83
   8   5   5    9.79    0.95
   8   5   5   12.43    1.28
   8   5   5    8.75    0.91
   8   5   5   14.69    1.31
  -9  -5  -5    3.10    0.63
   9  -5   5    2.86    0.42
   9  -5   5    3.59    0.45
   9   5   5    3.32    0.67
   9   5   5    3.59    0.68
   9   5   5    3.37    0.58
   9   5   5    2.96    0.57
  10  -5   5    0.26    0.26
  10  -5   5    0.64    0.28
  10   5   5    0.50    0.40
  10   5   5   -0.10    0.41
  10   5   5    1.16    0.40
  11  -6  -5    1.94    0.47
  11  -6  -5    2.62    0.46
  11  -6  -5    1.96    0.52
 -11  -6   5    1.71    0.35
  10  -6  -5    7.59    0.61
  10  -6  -5   10.46    0.86
  10  -6  -5    9.28    0.86
 -10  -6   5    8.17    0.74
  10  -6  -5    7.62    0.88
  10  -6  -5    8.69    0.99
 -10   6   5   11.01    1.16
   9  -6  -5   16.91    1.24
   9  -6  -5   11.24    1.27
  -9  -6   5   16.21    1.08
   9  -6  -5   15.60    1.24
   9  -6  -5   15.68    1.36
  -9   6   5   17.42    1.52
   8  -6  -5    0.33    0.60
   8  -6  -5    0.76    0.51
   8  -6  -5    1.27    0.60
   8  -6  -5    0.74    0.47
  -8  -6   5    0.09    0.33
  -8   6   5    0.95    0.48
  -8   6   5    0.80    0.59
   7  -6  -5    0.34    0.40
   7  -6  -5    0.45    0.51
   7  -6  -5    0.04    0.52
  -7  -6   5    0.17    0.28
   7  -6  -5   -0.03    0.46
  -7  -6   5    0.39    0.22
  -7   6   5    0.30    0.41
   6  -6  -5   30.44    1.98
   6  -6  -5   29.16    1.99
  -6   6   5   28.76    1.79
   5  -6  -5   -0.19    0.35
   5  -6  -5    0.25    0.36
   4  -6  -5   39.52    2.33
   4  -6  -5   34.44    2.25
  -4  -6   5   35.79    1.83
  -3  -6   5   60.96    2.99
   3  -6  -5   64.69    3.69
  -2  -6   5    7.43    0.66
   2  -6  -5    7.39    1.23
   1  -6  -5   12.79    1.64
   0  -6  -5    2.58    0.77
   2  -6   5    7.67    0.76
   3  -6   5    3.62    0.32
   3   6   5    3.78    0.57
   4  -6   5   58.19    3.79
   4  -6   5   64.67    3.14
  -4  -6  -5   58.25    3.42
   4   6   5   58.29    3.58
   4   6   5   58.66    3.50
  -5  -6  -5    0.68    0.48
   5   6   5    0.36    0.42
   5   6   5    0.41    0.49
  -6  -6  -5    1.50    0.45
   6  -6   5    1.12    0.30
   6   6   5    1.76    0.48
   6   6   5    1.63    0.63
   6   6   5    2.04    0.61
   7  -6   5   -0.02    0.29
   7  -6   5    0.51    0.31
  -7  -6  -5    0.73    0.45
   7   6   5    0.28    0.46
   7   6   5    0.10    0.54
   7   6   5    0.01    0.59
  -8  -6  -5    7.31    0.88
   8  -6   5    6.23    0.60
  -8  -6  -5    8.16    0.82
   8  -6   5    8.28    0.63
   8   6   5    6.89    1.01
   8   6   5    9.50    0.90
   8   6   5    7.85    0.99
   9  -6   5    0.44    0.30
  -9  -6  -5   -0.05    0.40
   9  -6   5    0.29    0.28
  -9  -6  -5    0.37    0.41
   9   6   5    0.68    0.58
   9   6   5    0.21    0.46
   9   6   5    0.28    0.47
  10  -6   5    0.83    0.24
 -10  -6  -5    0.50    0.32
  10   6   5    0.51    0.38
  10   6   5    0.90    0.38
  11  -7  -5   15.58    0.99
  11  -7  -5   14.87    1.04
 -11  -7   5   16.80    0.94
 -10  -7   5   -0.45    0.31
  10  -7  -5   -0.22    0.43
  10  -7  -5    0.74    0.42
  10  -7  -5    0.42    0.46
  10  -7  -5    0.30    0.45
   9  -7  -5    1.54    0.55
   9  -7  -5    0.43    0.57
   9  -7  -5    0.84    0.52
   9  -7  -5    1.33    0.34
   9  -7  -5    1.90    0.57
  -9  -7   5    1.40    0.39
   8  -7  -5    3.78    0.73
   8  -7  -5    2.65    0.44
   8  -7  -5    3.12    0.56
   8  -7  -5    2.81    0.68
   8  -7  -5    2.18    0.70
   8  -7  -5    2.73    0.57
  -8  -7   5    3.71    0.48
  -8   7   5    3.62    0.56
   7  -7  -5    2.02    0.62
   7  -7  -5    3.10    0.72
  -7  -7   5    2.81    0.40
   7  -7  -5    2.62    0.54
   7  -7  -5    3.65    0.67
   6  -7  -5   -0.17    0.34
   6  -7  -5    0.27    0.45
   6  -7  -5   -0.02    0.47
   6  -7  -5    0.53    0.46
   5  -7  -5   21.68    1.57
   5  -7  -5   23.72    1.60
   4  -7  -5   58.07    3.42
   4  -7  -5   54.98    3.29
   4  -7  -5   53.24    3.21
  -4  -7   5   57.94    2.76
  -3  -7   5   65.57    3.18
   3  -7  -5   67.99    3.95
   2  -7  -5    9.25    0.91
   1  -7  -5   16.37    1.79
   2  -7   5   14.62    0.77
  -2  -7  -5   13.95    1.13
   3  -7   5   22.14    1.14
  -3  -7  -5   18.76    1.40
   3  -7   5   18.75    1.58
   4  -7   5   32.56    1.72
   4  -7   5   30.44    2.23
  -4  -7  -5   30.48    2.01
  -5  -7  -5   34.85    2.11
  -5  -7  -5   37.30    2.33
   5   7   5   37.86    2.45
  -6  -7  -5    8.94    0.87
   6  -7   5    6.56    0.61
   6   7   5    9.11    1.08
   6   7   5    9.59    1.15
   7  -7   5    4.52    0.46
  -7  -7  -5    5.19    0.75
  -7  -7  -5    3.76    0.62
   7   7   5    5.15    0.88
   7   7   5    5.30    0.91
   8  -7   5    0.74    0.31
  -8  -7  -5    0.47    0.48
  -8  -7  -5   -0.01    0.41
   8   7   5    0.86    0.58
   8   7   5    0.13    0.66
  -9  -7  -5    0.08    0.37
  -9  -7  -5    0.40    0.39
   9  -7   5    0.50    0.25
  -9  -7  -5   -0.05    0.24
   9   7   5   -0.17    0.49
 -10  -7  -5    6.39    0.57
  11  -8  -5    0.47    0.27
  11  -8  -5    0.54    0.31
  10  -8  -5   36.43    2.25
  10  -8  -5   36.91    2.02
  10  -8  -5   38.06    2.12
 -10  -8   5   38.19    1.99
   9  -8  -5    2.74    0.58
   9  -8  -5    3.22    0.70
   9  -8  -5    3.41    0.59
   9  -8  -5    4.12    0.62
   9  -8  -5    3.57    0.28
   9  -8  -5    3.26    0.69
  -9  -8   5    3.24    0.43
   9  -8  -5    3.22    0.27
   8  -8  -5    3.93    0.45
   8  -8  -5    4.03    0.62
   8  -8  -5    4.04    0.64
   8  -8  -5    5.76    0.75
   8  -8  -5    3.63    0.75
  -8  -8   5    3.86    0.46
   8  -8  -5    3.58    0.73
  -7  -8   5   39.63    2.11
   7  -8  -5   42.82    2.56
   7  -8  -5   36.62    2.05
   7  -8  -5   39.70    2.51
   7  -8  -5   39.44    2.49
   7  -8  -5   39.37    2.27
   6  -8  -5    8.26    0.89
   6  -8  -5    6.58    0.60
   6  -8  -5    7.06    0.89
   6  -8  -5    6.75    0.69
   6  -8  -5    5.47    0.75
   5  -8  -5   42.47    2.57
   5  -8  -5   40.44    2.55
   4  -8  -5   10.32    0.99
   4  -8  -5   11.03    1.02
  -4  -8   5   10.37    0.67
  -3  -8   5    5.28    0.37
   3  -8  -5    4.90    0.63
   3  -8  -5    4.44    0.66
   2  -8  -5  133.71    7.59
   1  -8  -5   10.04    0.94
   0  -8  -5    3.21    0.58
  -1  -8  -5    7.89    0.87
   1  -8   5    7.89    0.90
  -2  -8  -5    3.52    0.62
   2  -8   5    4.98    0.31
   2  -8   5    4.54    0.76
  -2  -8  -5    5.52    0.65
  -3  -8  -5    3.14    0.55
   3  -8   5    4.29    0.38
   3  -8   5    4.65    0.77
  -4  -8  -5    2.29    0.51
   4  -8   5    1.96    0.28
   4  -8   5    2.25    0.65
  -5  -8  -5   75.27    4.02
  -5  -8  -5   75.84    4.27
  -6  -8  -5   17.97    1.29
  -7  -8  -5    3.37    0.60
  -7  -8  -5    2.02    0.55
  -8  -8  -5   39.86    2.15
  -8  -8  -5   34.70    1.86
  -8  -8  -5   33.68    2.18
   8   8   5   38.44    2.47
  -9  -8  -5    0.93    0.40
  -9  -8  -5    0.72    0.34
   9   8   5    0.71    0.51
 -10  -8  -5    0.90    0.28
  10  -9  -5    4.10    0.51
  10  -9  -5    4.43    0.53
  10  -9  -5    3.75    0.53
   9  -9  -5   11.34    0.91
   9  -9  -5    9.78    1.01
   9  -9  -5    9.17    0.86
   9  -9  -5   10.81    0.91
  -9  -9   5   10.91    0.73
   9  -9  -5   11.26    1.02
   8  -9  -5   13.28    1.29
   8  -9  -5   14.54    1.31
  -8  -9   5   14.17    0.92
   8  -9  -5   15.60    1.17
   8  -9  -5   14.63    1.13
   8  -9  -5   15.03    1.19
   7  -9  -5    1.43    0.48
   7  -9  -5    1.67    0.32
   7  -9  -5    1.22    0.60
   7  -9  -5    1.44    0.55
   7  -9  -5    1.38    0.61
   6  -9  -5    0.78    0.54
   6  -9  -5    1.66    0.54
   6  -9  -5    1.47    0.33
   6  -9  -5    0.74    0.41
   6  -9  -5    2.36    0.64
   5  -9  -5    1.21    0.50
   5  -9  -5    1.84    0.50
   5  -9  -5    2.08    0.36
   5  -9  -5    1.56    0.54
   5  -9  -5    2.21    0.45
   4  -9  -5   45.95    2.72
  -4  -9   5   43.34    2.23
   4  -9  -5   43.91    2.26
   4  -9  -5   46.08    2.67
   3  -9  -5   55.27    3.48
  -3  -9   5   58.71    2.74
   3  -9  -5   52.99    2.78
   3  -9  -5   59.31    3.22
  -2  -9   5    0.58    0.44
  -2  -9   5    0.23    0.08
   2  -9  -5    0.46    0.43
  -2  -9   5    0.52    0.10
   2  -9  -5    0.10    0.22
   2  -9  -5    0.23    0.32
   1  -9  -5   70.98    3.95
   1  -9  -5   70.56    4.28
   1  -9  -5   70.81    3.48
  -1  -9   5   76.31    4.52
   0  -9  -5   52.58    3.25
   0  -9  -5   53.59    2.98
   0  -9   5   55.73    3.43
   0  -9  -5   50.12    2.60
   1  -9   5    3.90    0.69
  -1  -9  -5    3.49    0.52
  -1  -9  -5    3.56    0.63
   2  -9   5    1.42    0.57
   2  -9   5    2.04    0.19
  -2  -9  -5    2.79    0.52
   3  -9   5    2.33    0.27
   3  -9   5    2.90    0.50
  -3  -9  -5    2.99    0.56
   3  -9   5    2.39    0.67
  -4  -9  -5   30.13    1.84
   4  -9   5   33.38    1.72
   4  -9   5   30.88    1.96
   4  -9   5   28.84    2.25
  -4  -9  -5   31.70    2.03
  -5  -9  -5    9.28    0.70
  -5  -9  -5    8.54    0.84
  -6  -9  -5    8.27    0.64
  -6  -9  -5    6.10    0.74
  -7  -9  -5   80.45    4.12
  -7  -9  -5   72.48    4.23
  -7  -9  -5   78.65    3.72
  -8  -9  -5   14.49    1.03
  -8  -9  -5   13.71    1.06
  -8  -9  -5   13.71    0.70
  -8  -9  -5   14.08    0.70
  -9  -9  -5   11.40    0.85
  10 -10  -5    0.97    0.41
  10 -10  -5    1.12    0.34
  10 -10  -5    1.32    0.34
   9 -10  -5    0.42    0.52
   9 -10  -5    1.12    0.44
   9 -10  -5    0.94    0.40
   9 -10  -5    0.36    0.41
   8 -10  -5    6.28    0.85
   8 -10  -5    5.11    0.67
   8 -10  -5    5.22    0.62
   8 -10  -5    5.01    0.69
   8 -10  -5    6.06    0.76
   7 -10  -5   23.33    1.51
   7 -10  -5   24.21    1.62
   7 -10  -5   22.84    1.73
   7 -10  -5   24.61    1.71
   6 -10  -5   18.66    1.41
   6 -10  -5   16.48    1.46
   6 -10  -5   17.28    1.27
   6 -10  -5   20.56    1.49
   6 -10  -5   19.62    1.00
   6 -10  -5   20.20    0.99
   5 -10  -5    2.37    0.58
   5 -10  -5    2.01    0.44
   5 -10  -5    1.86    0.29
   5 -10  -5    2.06    0.54
   5 -10  -5    1.41    0.56
   4 -10  -5   43.58    2.60
   4 -10  -5   41.89    2.11
   4 -10  -5   39.67    2.55
   4 -10  -5   45.58    2.58
  -4 -10   5   44.22    2.16
   4 -10  -5   41.56    2.35
   3 -10  -5   10.67    0.99
  -3 -10   5    9.92    0.61
   3 -10  -5   11.01    0.97
  -3 -10   5   10.43    0.86
   3 -10  -5    9.92    0.66
   2 -10  -5   12.96    0.79
  -2 -10   5   13.69    1.31
  -2 -10   5   12.12    0.72
  -2 -10   5   14.76    0.70
   2 -10  -5   13.61    1.06
  -1 -10   5   28.00    1.98
   1 -10  -5   22.94    1.79
   1 -10  -5   25.97    1.61
   1 -10  -5   24.53    1.32
   0 -10   5   51.72    3.33
   0 -10  -5   47.65    3.16
   0 -10  -5   50.09    2.48
   0 -10  -5   51.76    2.87
   1 -10   5   15.20    1.38
  -1 -10  -5   14.23    1.27
  -1 -10  -5   14.42    1.11
  -1 -10  -5   13.95    0.86
  -2 -10  -5    4.13    0.60
   2 -10   5    4.99    0.58
   2 -10   5    4.14    0.31
   2 -10   5    4.61    0.84
  -2 -10  -5    3.28    0.38
  -3 -10  -5    3.90    0.54
   3 -10   5    3.18    0.76
  -3 -10  -5    4.32    0.43
   3 -10   5    3.95    0.62
   3 -10   5    3.41    0.34
   3 -10   5    3.42    0.56
  -3 -10  -5    4.79    0.65
   3 -10   5    2.79    0.52
   4 -10   5    0.25    0.63
  -4 -10  -5    0.62    0.26
   4 -10   5    0.61    0.42
  -4 -10  -5    0.06    0.37
  -4 -10  -5   -0.01    0.45
   4 -10   5    0.80    0.23
  -5 -10  -5    0.61    0.28
  -5 -10  -5    0.35    0.41
  -6 -10  -5   10.11    0.68
  -6 -10  -5   12.82    1.00
  -6 -10  -5   10.86    0.95
  -7 -10  -5    7.59    0.77
  -7 -10  -5    8.88    0.79
  -8 -10  -5    7.76    0.71
  -8 -10  -5    7.76    0.65
  -9 -10  -5    8.94    0.69
  10 -11  -5    0.33    0.25
   9 -11  -5    0.82    0.49
   9 -11  -5    0.33    0.35
   9 -11  -5    0.58    0.37
   8 -11  -5    0.02    0.41
   8 -11  -5   -0.66    0.33
   8 -11  -5   -0.25    0.42
   8 -11  -5   -0.25    0.55
   7 -11  -5    1.43    0.39
   7 -11  -5    0.38    0.44
   7 -11  -5    1.17    0.65
   7 -11  -5    0.89    0.43
   6 -11  -5    1.11    0.54
   6 -11  -5    0.86    0.61
   6 -11  -5    1.59    0.46
   6 -11  -5    1.59    0.53
   6 -11  -5    1.55    0.46
   5 -11  -5    2.98    0.66
   5 -11  -5    2.53    0.48
   5 -11  -5    3.40    0.58
   5 -11  -5    3.47    0.60
   4 -11  -5    0.64    0.42
  -4 -11   5    0.38    0.28
  -4 -11   5    0.06    0.40
   4 -11  -5    0.56    0.50
   4 -11  -5    0.19    0.41
   4 -11  -5    0.13    0.33
   3 -11  -5    7.97    0.76
   3 -11  -5    7.90    0.79
  -3 -11   5    6.22    0.69
  -3 -11   5    7.03    0.51
   3 -11  -5    6.75    0.65
  -3 -11   5    7.57    0.73
   3 -11  -5    7.28    0.44
   3 -11  -5    7.44    0.46
   3 -11  -5    8.02    0.81
  -2 -11   5    0.59    0.36
  -2 -11   5    0.42    0.19
   2 -11  -5    0.64    0.42
   2 -11  -5    0.47    0.37
  -2 -11   5    0.53    0.38
  -2 -11   5    0.98    0.49
   2 -11  -5    0.39    0.16
  -2 -11   5    0.51    0.14
  -2 -11   5    0.18    0.52
   2 -11  -5    0.37    0.18
   2 -11  -5    0.28    0.30
  -1 -11   5    1.66    0.50
   1 -11  -5    1.58    0.43
  -1 -11   5    2.37    0.46
   1 -11  -5    2.25    0.38
   1 -11  -5    2.17    0.26
   1 -11  -5    2.48    0.25
  -1 -11   5    2.19    0.65
  -1 -11   5    1.68    0.43
   0 -11   5    2.20    0.53
   0 -11  -5    2.52    0.28
   0 -11   5    3.45    0.52
   0 -11  -5    2.75    0.50
   0 -11  -5    2.36    0.41
   0 -11   5    2.38    0.46
   0 -11  -5    2.59    0.27
   0 -11   5    2.71    0.74
  -1 -11  -5    1.03    0.40
  -1 -11  -5    0.21    0.31
  -1 -11  -5    0.59    0.20
  -1 -11  -5    0.44    0.18
   1 -11   5   -0.56    0.54
   1 -11   5    0.37    0.38
   1 -11   5    0.51    0.38
   1 -11   5    0.28    0.43
  -2 -11  -5    9.94    0.83
   2 -11   5   10.39    0.60
  -2 -11  -5    9.99    0.60
   2 -11   5    9.87    0.88
   2 -11   5   10.68    0.94
  -2 -11  -5    8.82    0.60
   2 -11   5    9.39    0.97
  -2 -11  -5   10.72    0.94
   2 -11   5   10.36    1.24
   3 -11   5    1.73    0.49
  -3 -11  -5    1.95    0.45
   3 -11   5    1.40    0.23
  -3 -11  -5    1.06    0.48
   3 -11   5    0.80    0.44
  -3 -11  -5    1.46    0.23
   3 -11   5    1.93    0.54
  -3 -11  -5    1.02    0.23
   3 -11   5    1.03    0.68
   4 -11   5    1.17    0.25
  -4 -11  -5    0.77    0.49
  -4 -11  -5    1.42    0.25
   4 -11   5    0.98    0.32
  -4 -11  -5    1.42    0.45
   4 -11   5    1.12    0.48
   4 -11   5    0.74    0.66
  -4 -11  -5    1.35    0.22
  -5 -11  -5   15.55    1.15
  -6 -11  -5    2.79    0.53
  -6 -11  -5    3.79    0.51
  -7 -11  -5    0.74    0.31
  -7 -11  -5    0.68    0.41
  -8 -11  -5    2.29    0.41
  -9 -11  -5    0.23    0.22
   9 -12  -5    0.07    0.28
   9 -12  -5    0.25    0.26
   9 -12  -5    0.00    0.38
  -9 -12   5   -0.07    0.31
  -8 -12   5    4.79    0.57
   8 -12  -5    4.01    0.49
   8 -12  -5    5.98    0.59
   8 -12  -5    4.11    0.69
   7 -12  -5    1.53    0.64
   7 -12  -5    1.52    0.44
  -7 -12   5    1.21    0.48
   7 -12  -5    2.39    0.49
   7 -12  -5    2.15    0.45
   6 -12  -5    1.92    0.65
   6 -12  -5    1.67    0.46
   6 -12  -5    1.67    0.56
   6 -12  -5    1.86    0.49
  -6 -12   5    2.23    0.53
   5 -12  -5    0.36    0.34
   5 -12  -5    0.62    0.40
   5 -12  -5    0.17    0.41
   5 -12  -5   -0.23    0.53
  -5 -12   5    1.17    0.49
   5 -12  -5    0.06    0.51
   4 -12  -5   35.55    2.01
   4 -12  -5   36.27    2.14
   4 -12  -5   34.52    2.40
   4 -12  -5   33.55    2.24
  -4 -12   5   35.42    1.83
  -4 -12   5   34.41    2.06
   4 -12  -5   38.21    2.15
   3 -12  -5    1.49    0.39
  -3 -12   5    1.59    0.47
   3 -12  -5    1.17    0.52
   3 -12  -5    1.61    0.45
   3 -12  -5    1.36    0.42
  -3 -12   5    1.21    0.28
  -2 -12   5    8.22    0.77
  -2 -12   5    7.63    0.97
  -2 -12   5    5.97    0.76
  -2 -12   5    8.05    0.77
   2 -12  -5    8.11    0.69
  -2 -12   5    7.85    0.51
   2 -12  -5    8.55    0.80
   2 -12  -5    8.43    0.80
   2 -12  -5    9.13    0.80
  -1 -12   5   15.20    0.85
  -1 -12   5   16.93    1.12
  -1 -12   5   17.45    1.51
   1 -12  -5   15.46    1.17
   1 -12  -5   14.34    1.14
  -1 -12   5   15.92    0.82
   1 -12  -5   16.16    1.06
  -1 -12   5   15.60    1.16
   0 -12   5   12.96    0.68
   0 -12   5   13.60    1.04
   0 -12  -5   14.23    1.04
   0 -12   5   12.97    1.05
   0 -12   5   17.14    1.53
   0 -12   5   12.10    1.19
   0 -12  -5   11.72    0.91
   0 -12  -5   12.45    1.13
  -1 -12  -5   17.43    1.10
   1 -12   5   15.54    1.20
   1 -12   5   15.66    0.89
   1 -12   5   16.52    1.16
  -1 -12  -5   18.14    1.23
   1 -12   5   16.22    0.87
   1 -12   5   16.60    1.63
   1 -12   5   15.45    1.32
  -2 -12  -5    7.81    0.76
   2 -12   5    9.35    0.62
   2 -12   5   10.56    0.90
  -2 -12  -5   10.18    0.89
   2 -12   5   10.80    1.28
   2 -12   5    9.99    0.60
   2 -12   5   10.25    0.95
   2 -12   5   10.16    1.04
   3 -12   5   -0.44    0.44
   3 -12   5    0.13    0.28
   3 -12   5    0.23    0.19
   3 -12   5    0.62    0.70
  -3 -12  -5    0.68    0.44
  -3 -12  -5    0.60    0.36
   3 -12   5    0.47    0.46
   4 -12   5    0.50    0.31
   4 -12   5   -0.50    0.60
   4 -12   5    0.61    0.21
   4 -12   5    0.70    0.48
  -4 -12  -5    0.27    0.40
  -5 -12  -5    0.75    0.42
  -5 -12  -5    0.75    0.32
  -6 -12  -5   20.22    1.23
  -6 -12  -5   22.01    1.36
  -7 -12  -5    0.41    0.36
  -8 -12  -5    9.43    0.68
   9 -13  -5    0.97    0.35
  -8 -13   5    2.98    0.46
   8 -13  -5    3.43    0.41
   8 -13  -5    2.44    0.55
   8 -13  -5    3.10    0.38
   7 -13  -5    1.12    0.40
   7 -13  -5    1.30    0.61
  -7 -13   5    0.93    0.44
   7 -13  -5    0.61    0.35
   7 -13  -5    1.00    0.49
   6 -13  -5    2.14    0.59
   6 -13  -5    2.78    0.67
   6 -13  -5    2.13    0.44
  -6 -13   5    1.66    0.49
  -5 -13   5    3.87    0.63
   5 -13  -5    3.99    0.52
   5 -13  -5    3.52    0.70
   5 -13  -5    5.06    0.75
   5 -13  -5    4.00    0.52
  -4 -13   5   31.07    1.85
   4 -13  -5   31.01    1.83
   4 -13  -5   30.09    2.15
   4 -13  -5   32.07    2.04
  -4 -13   5   30.52    1.62
   4 -13  -5   29.96    1.77
   3 -13  -5   23.81    1.46
   3 -13  -5   23.46    1.75
   3 -13  -5   24.60    1.40
  -3 -13   5   21.18    1.21
   3 -13  -5   22.69    1.60
  -3 -13   5   22.97    1.50
  -2 -13   5   12.07    0.72
   2 -13  -5   12.47    0.92
  -2 -13   5   14.34    1.39
   2 -13  -5   14.19    1.07
   2 -13  -5   13.35    0.99
  -2 -13   5   12.02    1.03
  -2 -13   5   13.23    1.16
   2 -13  -5   12.10    1.19
  -2 -13   5   10.60    0.99
  -1 -13   5   34.33    2.46
   1 -13  -5   33.47    1.88
  -1 -13   5   36.15    2.29
  -1 -13   5   34.22    1.64
   1 -13  -5   33.20    1.95
  -1 -13   5   33.35    1.93
  -1 -13   5   32.20    2.05
   1 -13  -5   33.41    2.27
  -1 -13   5   30.24    1.72
   0 -13  -5    9.87    0.88
   0 -13   5   10.82    0.97
   0 -13   5   11.21    0.97
   0 -13  -5   10.88    1.04
   0 -13   5   12.95    1.33
   0 -13   5   10.66    1.07
   0 -13  -5    9.76    0.82
   0 -13   5   10.17    0.60
   1 -13   5   10.36    0.92
   1 -13   5    9.29    0.59
  -1 -13  -5    9.16    0.80
   1 -13   5    8.44    0.83
  -1 -13  -5    9.57    0.85
   1 -13   5   10.07    0.59
   1 -13   5   11.67    1.29
   1 -13   5    8.61    0.96
   2 -13   5    1.69    0.29
  -2 -13  -5    1.56    0.42
   2 -13   5    1.57    0.76
  -2 -13  -5    1.83    0.45
   2 -13   5    0.69    0.53
   2 -13   5    1.53    0.51
   2 -13   5    1.90    0.24
   2 -13   5    1.71    0.52
   3 -13   5    4.01    0.67
   3 -13   5    3.68    0.43
  -3 -13  -5    4.75    0.57
   3 -13   5    3.00    0.58
   3 -13   5    4.45    0.39
   3 -13   5    3.42    0.81
   4 -13   5    3.83    0.46
   4 -13   5    4.66    0.69
  -4 -13  -5    6.63    0.63
  -4 -13  -5    5.51    0.45
   4 -13   5    3.49    0.77
   4 -13   5    4.33    0.41
  -5 -13  -5    0.40    0.37
  -6 -13  -5    2.63    0.44
  -7 -13  -5   18.30    1.09
   8 -14  -5    2.20    0.44
   8 -14  -5    2.19    0.27
  -8 -14   5    2.17    0.37
   7 -14  -5    8.70    0.85
   7 -14  -5    7.69    0.83
   7 -14  -5    8.82    0.67
  -7 -14   5    9.65    0.78
   7 -14  -5    9.37    0.61
   6 -14  -5    0.76    0.32
   6 -14  -5    0.77    0.57
   6 -14  -5    0.51    0.50
  -6 -14   5    0.82    0.44
   5 -14  -5   11.79    1.18
   5 -14  -5   13.93    0.93
   5 -14  -5   14.55    1.19
  -5 -14   5   13.67    1.07
   4 -14  -5    0.14    0.54
  -4 -14   5    0.44    0.27
  -4 -14   5    0.24    0.46
   4 -14  -5    0.47    0.33
   4 -14  -5    0.76    0.55
   3 -14  -5   43.52    2.78
  -3 -14   5   40.63    2.09
   3 -14  -5   40.95    2.54
   3 -14  -5   42.18    2.28
  -3 -14   5   42.23    2.36
  -2 -14   5   43.92    2.62
  -2 -14   5   39.74    2.25
  -2 -14   5   36.79    2.35
   2 -14  -5   42.16    2.66
  -2 -14   5   37.70    1.96
   2 -14  -5   37.77    2.39
   2 -14  -5   40.50    2.17
  -1 -14   5    0.42    0.51
  -1 -14   5    0.55    0.43
  -1 -14   5    0.14    0.62
   1 -14  -5    0.34    0.51
  -1 -14   5    0.49    0.21
   1 -14  -5    0.67    0.34
  -1 -14   5    0.72    0.47
   0 -14  -5    0.99    0.53
   0 -14   5    1.16    0.56
   0 -14   5    0.82    0.48
   0 -14   5    1.26    0.75
   0 -14  -5    1.40    0.37
   0 -14   5    0.78    0.43
   0 -14   5    0.75    0.16
   0 -14   5    0.85    0.21
   1 -14   5   14.61    1.33
   1 -14   5   14.67    1.55
   1 -14   5   14.44    0.84
  -1 -14  -5   15.91    1.05
   1 -14   5   15.47    1.19
   1 -14   5   18.34    1.21
   1 -14   5   15.67    0.87
   2 -14   5    3.16    0.31
   2 -14   5    3.04    0.65
  -2 -14  -5    3.63    0.47
   2 -14   5    3.54    0.36
   2 -14   5    3.49    0.59
   2 -14   5    2.89    0.82
   3 -14   5    0.18    0.26
   3 -14   5   -0.20    0.48
  -3 -14  -5   -0.21    0.33
   3 -14   5    0.23    0.18
   3 -14   5    0.17    0.61
   4 -14   5   14.46    1.20
   4 -14   5   14.50    0.89
   4 -14   5   14.36    0.89
   4 -14   5   13.96    1.40
  -4 -14  -5   19.92    1.06
   5 -14   5   43.00    2.83
  -5 -14  -5   49.35    2.46
  -6 -14  -5    0.25    0.28
  -7 -14  -5    0.76    0.22
   7 -15  -5    7.68    0.71
  -7 -15   5    7.41    0.61
   7 -15  -5    6.23    0.66
   6 -15  -5    0.59    0.26
  -6 -15   5    0.09    0.35
   6 -15  -5    0.13    0.46
   6 -15  -5    0.16    0.43
   5 -15  -5    6.07    0.54
  -5 -15   5    5.57    0.63
   5 -15  -5    5.50    0.75
   5 -15  -5    6.96    0.75
   4 -15  -5   23.29    1.30
   4 -15  -5   23.47    1.69
  -4 -15   5   23.64    1.43
   4 -15  -5   24.79    1.57
  -4 -15   5   19.55    1.21
  -3 -15   5    1.25    0.45
   3 -15  -5    1.18    0.34
  -3 -15   5    1.05    0.27
   3 -15  -5    0.87    0.59
   3 -15  -5    0.19    0.48
   2 -15  -5    5.29    0.51
   2 -15  -5    6.58    0.84
  -2 -15   5    4.32    0.40
  -2 -15   5    4.48    0.61
  -2 -15   5    6.23    0.75
  -2 -15   5    3.56    0.53
  -1 -15   5    0.60    0.22
  -1 -15   5    0.98    0.54
  -1 -15   5    1.19    0.48
   1 -15  -5    1.39    0.58
   1 -15  -5    0.77    0.32
  -1 -15   5    0.93    0.41
   0 -15  -5    4.80    0.70
   0 -15   5    3.57    0.55
   0 -15   5    4.42    0.72
   0 -15   5    4.93    0.63
   0 -15   5    3.34    0.31
   0 -15   5    3.57    0.32
   0 -15  -5    3.27    0.44
   1 -15   5    0.69    0.46
   1 -15   5    0.58    0.21
   1 -15   5    0.86    0.17
  -1 -15  -5    1.07    0.34
   1 -15   5    1.88    0.60
   1 -15   5    0.30    0.69
   2 -15   5   10.39    0.97
  -2 -15  -5    8.65    0.70
   2 -15   5    9.70    0.80
   2 -15   5    8.24    0.53
   2 -15   5    7.23    1.03
   2 -15   5    7.70    0.54
   3 -15   5   12.31    0.79
   3 -15   5   14.24    0.81
  -3 -15  -5   15.40    0.93
   3 -15   5   13.63    1.16
  -4 -15  -5   15.90    0.94
   4 -15   5   15.01    1.14
   4 -15   5   13.67    0.84
  -5 -15  -5    4.83    0.43
   5 -15   5    4.02    0.52
  -6 -15  -5    1.41    0.24
  -6 -16   5   18.66    1.09
   6 -16  -5   19.05    1.22
   6 -16  -5   17.54    1.27
  -5 -16   5   -0.03    0.32
   5 -16  -5   -0.25    0.42
   5 -16  -5    0.47    0.42
  -4 -16   5    0.51    0.37
   4 -16  -5   -0.31    0.48
   4 -16  -5   -0.01    0.43
   4 -16  -5    0.07    0.21
  -3 -16   5    1.40    0.43
   3 -16  -5    1.12    0.57
   3 -16  -5    0.87    0.25
  -3 -16   5    1.49    0.26
  -2 -16   5    0.60    0.21
  -2 -16   5    0.01    0.44
   2 -16  -5    0.80    0.55
  -2 -16   5    0.43    0.40
   2 -16  -5    0.38    0.25
   1 -16  -5    1.80    0.58
  -1 -16   5    2.24    0.56
  -1 -16   5    1.91    0.25
  -1 -16   5    2.31    0.49
  -1 -16   5    1.74    0.21
   1 -16  -5    1.97    0.31
   0 -16   5    0.38    0.42
   0 -16  -5    0.08    0.25
   0 -16   5    0.30    0.13
   0 -16   5    0.58    0.49
   0 -16   5    0.24    0.17
  -1 -16  -5   -0.01    0.23
   1 -16   5   -0.28    0.46
   1 -16   5    0.24    0.40
   1 -16   5    0.28    0.18
   1 -16   5    0.37    0.13
  -2 -16  -5    4.50    0.42
   2 -16   5    4.32    0.64
   2 -16   5    3.70    0.50
   2 -16   5    3.44    0.32
   2 -16   5    3.97    0.33
   3 -16   5    0.29    0.13
   3 -16   5    0.08    0.40
  -3 -16  -5    0.48    0.25
  -4 -16  -5   20.78    1.10
   4 -16   5   18.52    1.34
  -5 -17   5    0.22    0.25
   5 -17  -5    0.35    0.35
   4 -17  -5    0.39    0.41
  -4 -17   5    0.23    0.30
   3 -17  -5    5.81    0.71
  -3 -17   5    5.96    0.57
  -2 -17   5    2.03    0.41
   2 -17  -5    2.65    0.55
  -2 -17   5    2.18    0.21
   1 -17  -5   20.65    1.34
  -1 -17   5   20.13    1.31
  -1 -17   5   14.93    0.92
  -1 -17   5   17.88    1.11
   0 -17   5   -0.22    0.33
   0 -17   5    0.41    0.43
   0 -17   5    0.07    0.10
   1 -17   5   -0.40    0.39
   1 -17   5    0.24    0.31
   1 -17   5    0.16    0.10
   2 -17   5    1.23    0.43
   3 -17   5    4.86    0.54
   4 -17   5   -0.02    0.28
  -3 -18   5   14.18    0.88
   3 -18  -5   15.02    1.07
   2 -18  -5    9.85    0.82
  -2 -18   5    9.38    0.68
   1 -18  -5    4.95    0.57
  -1 -18   5    5.84    0.59
  -1 -18   5    5.49    0.49
   0 -18   5    0.88    0.35
   0 -18   5    0.53    0.27
   1 -18   5    9.86    0.80
   2 -18   5    4.66    0.50
 -12   0   6    0.23    0.27
 -11   0   6    9.23    0.81
 -11   0   6    9.87    0.82
 -10   0   6   25.93    1.61
 -10   0   6   23.96    1.64
 -10   0   6   24.48    1.37
 -10   0   6   27.47    1.81
  -9   0   6   43.99    2.76
  -9   0   6   46.04    2.63
  -9   0   6   40.82    2.56
  -9   0   6   41.01    2.22
  -9   0   6   44.52    2.47
  -8   0   6   92.54    5.24
  -8   0   6   86.45    4.71
  -8   0   6   98.47    5.00
  -8   0   6   84.92    4.93
  -7   0   6  125.91    6.36
  -7   0   6  113.23    6.64
  -7   0   6  115.39    6.30
  -6   0   6   46.19    2.71
  -6   0   6   43.61    2.54
  -5   0   6  105.27    5.48
  -5   0   6   98.61    7.35
  -5   0   6  105.49    5.78
  -4   0   6    3.41    0.42
  -4   0   6    2.57    0.73
  -3   0   6   25.58    2.16
  -2   0   6   52.58    3.82
  -1   0   6  205.91   13.60
   0   0   6   13.21    1.28
   1   0   6   92.62    6.39
   2   0   6   31.45    2.53
   3   0   6   75.63    5.59
   3   0   6   79.50    4.36
   4   0   6   23.18    1.48
   4   0   6   22.45    1.23
   5   0   6   55.15    3.00
   5   0   6   50.53    2.88
   5   0   6   46.67    2.50
   6   0   6    0.87    0.36
   6   0   6    0.66    0.36
   6   0   6   -0.14    0.41
   6   0   6    0.60    0.42
   6   0   6    0.32    0.26
   7   0   6  124.98    6.06
   7   0   6  126.10    6.91
   7   0   6  118.10    6.28
   7   0   6  121.18    5.86
   7   0   6  126.54    6.65
   8   0   6    2.05    0.55
   8   0   6    1.71    0.26
   8   0   6    1.75    0.50
   8   0   6    2.32    0.28
   8   0   6    1.46    0.48
   8   0   6    1.91    0.57
   9   0   6   33.21    1.92
   9   0   6   30.50    2.03
   9   0   6   31.53    1.85
   9   0   6   33.87    2.06
  -9   0  -6   35.83    1.90
  10   0   6   12.76    0.88
  10   0   6   13.60    0.93
  10   0   6   12.90    0.95
  11   0   6   13.13    0.80
 -12  -1   6    0.17    0.28
 -12   1   6    0.26    0.27
  11  -1  -6    3.72    0.74
 -11  -1   6    4.28    0.55
 -11  -1   6    5.45    0.57
 -11   1   6    5.21    0.39
 -11   1   6    5.34    0.61
 -11   1   6    4.37    0.60
 -11   1   6    5.12    0.40
 -10  -1   6    0.66    0.21
  10  -1  -6    1.02    0.65
 -10  -1   6    0.89    0.24
 -10  -1   6    0.66    0.46
 -10  -1   6    0.69    0.46
 -10  -1   6    0.32    0.43
 -10   1   6    0.97    0.47
 -10   1   6    0.16    0.44
 -10   1   6    0.49    0.31
 -10   1   6    0.81    0.56
  -9  -1   6    0.24    0.44
  -9  -1   6    0.35    0.55
  -9  -1   6    0.17    0.42
  -9  -1   6    0.34    0.49
  -9  -1   6   -0.04    0.27
  -9   1   6   -0.20    0.47
  -9   1   6    0.33    0.58
  -9   1   6   -0.08    0.52
  -9   1   6   -0.17    0.40
  -8  -1   6   39.97    2.33
  -8  -1   6   37.96    2.41
  -8  -1   6   40.38    2.29
  -8  -1   6   37.38    2.15
  -8  -1   6   38.10    1.95
  -8   1   6   32.34    2.24
  -8   1   6   38.73    2.33
  -8   1   6   37.84    2.50
  -8   1   6   36.79    2.17
  -8   1   6   38.62    2.33
  -7  -1   6   97.54    4.77
  -7  -1   6  105.12    5.42
  -7  -1   6   99.44    5.36
  -7  -1   6  101.96    5.66
  -7   1   6   97.77    5.40
  -7   1   6   98.76    5.71
  -7   1   6   98.28    5.41
  -6  -1   6    2.59    0.45
  -6  -1   6    1.67    0.37
  -6  -1   6    1.96    0.29
  -6   1   6    2.47    0.44
  -6   1   6    2.66    0.50
  -5  -1   6    3.13    0.41
  -5  -1   6    3.30    0.44
  -5   1   6    3.52    0.44
  -5   1   6    3.76    0.49
  -4  -1   6   10.02    0.74
  -4  -1   6    8.90    1.19
  -4   1   6    9.30    1.32
  -4   1   6    9.31    0.78
  -3  -1   6    0.64    0.44
  -3   1   6    1.33    0.56
  -2  -1   6    1.21    0.44
  -2   1   6    0.81    0.47
  -1  -1   6   11.34    1.14
  -1   1   6   12.74    1.29
   0  -1   6   47.17    3.38
   0   1   6   46.37    3.49
   1  -1   6   59.73    4.20
   1   1   6   58.91    4.34
   2  -1   6  100.03    6.67
   2   1   6   93.12    6.74
   3  -1   6   93.16    4.78
   3  -1   6   78.81    6.04
   3   1   6   86.97    6.20
   3   1   6   84.21    4.82
   4  -1   6    1.03    0.20
   4  -1   6    1.05    0.31
   4   1   6    0.86    0.34
   4   1   6    1.29    0.35
   5  -1   6   -0.14    0.29
   5  -1   6    0.24    0.32
   5  -1   6    0.05    0.19
   5   1   6    0.16    0.37
   5   1   6   -0.09    0.34
   6  -1   6   12.19    1.04
   6  -1   6   13.31    0.74
   6  -1   6   10.35    0.89
   6  -1   6   11.32    0.90
   6  -1   6   13.62    1.05
   6  -1   6   12.23    0.74
   6   1   6   10.69    0.92
   6   1   6   11.73    0.84
   6   1   6   11.81    0.97
   6   1   6   12.74    1.11
   6   1   6   12.78    1.12
   7  -1   6   25.03    1.49
   7  -1   6   26.42    1.24
   7  -1   6   23.86    1.65
   7  -1   6   24.21    1.23
   7  -1   6   24.04    1.53
   7  -1   6   25.26    1.67
   7   1   6   24.83    1.54
   7   1   6   24.80    1.41
   7   1   6   22.40    1.53
   7   1   6   24.21    1.75
   7   1   6   22.73    1.74
   8  -1   6   11.95    0.96
   8  -1   6    8.65    0.83
   8  -1   6   10.37    0.99
   8  -1   6   10.87    0.97
   8   1   6   10.00    1.00
   8   1   6   11.24    1.10
   8   1   6   11.64    0.99
   8   1   6   11.37    0.76
   8   1   6   10.16    0.92
   9  -1   6   10.63    0.85
   9  -1   6    9.34    0.82
  -9  -1  -6   10.07    0.69
   9  -1   6   10.02    0.89
   9  -1   6    8.27    0.76
   9   1   6   10.59    0.89
   9   1   6   10.03    0.90
   9   1   6    8.38    0.90
   9   1   6    9.94    0.84
  10  -1   6    3.18    0.45
  10  -1   6    4.91    0.49
  10   1   6    4.41    0.51
  10   1   6    4.61    0.51
  10   1   6    3.03    0.49
 -12  -2   6    8.03    0.62
 -12   2   6    8.20    0.64
  11  -2  -6    5.97    0.85
 -11  -2   6    5.39    0.54
 -11  -2   6    5.98    0.61
 -11   2   6    6.32    0.50
 -11   2   6    7.26    0.70
 -11   2   6    5.28    0.66
 -10  -2   6    2.00    0.52
 -10  -2   6    1.64    0.46
  10  -2  -6    1.06    0.68
  10  -2  -6    1.91    0.70
 -10  -2   6    1.69    0.49
 -10   2   6    1.88    0.55
 -10   2   6    1.63    0.50
 -10   2   6    1.96    0.64
  -9  -2   6    7.27    0.50
  -9  -2   6    6.30    0.72
   9  -2  -6    9.20    1.08
   9  -2  -6    4.61    0.88
  -9  -2   6    8.55    0.86
  -9  -2   6    6.74    0.80
  -9  -2   6    6.62    0.73
  -9  -2   6    7.01    0.49
  -9   2   6    6.48    0.82
  -9   2   6    6.42    0.77
  -9   2   6    5.80    0.82
  -9   2   6    5.28    0.85
  -8  -2   6    7.51    0.79
   8  -2  -6    7.42    1.01
  -8  -2   6    4.97    0.69
  -8  -2   6    5.33    0.48
  -8  -2   6    5.47    0.67
   8  -2  -6    7.50    0.97
  -8  -2   6    6.06    0.65
  -8   2   6    4.80    0.72
  -8   2   6    4.19    0.76
  -8   2   6    5.25    0.66
  -8   2   6    6.78    0.73
  -8   2   6    5.37    0.72
   7  -2  -6    4.53    0.77
  -7  -2   6    5.48    0.45
  -7  -2   6    4.49    0.61
  -7  -2   6    5.93    0.66
  -7  -2   6    5.80    0.63
  -7   2   6    4.44    0.70
  -7   2   6    6.42    0.75
  -7   2   6    6.60    0.76
  -6  -2   6   32.14    2.03
  -6  -2   6   36.54    1.93
  -6  -2   6   31.85    1.66
  -6   2   6   33.71    2.00
  -6   2   6   31.56    2.15
  -5  -2   6    6.19    0.60
  -5  -2   6    6.06    0.42
  -5  -2   6    6.25    0.56
  -5   2   6    6.72    0.71
  -5   2   6    6.22    0.63
  -4  -2   6    0.42    0.20
  -4  -2   6    0.39    0.45
  -4   2   6    0.61    0.29
  -4   2   6    0.08    0.56
  -3  -2   6   24.03    1.99
  -3   2   6   25.00    2.23
  -2  -2   6   28.05    2.25
  -2   2   6   32.24    2.54
  -1  -2   6   10.93    1.05
  -1   2   6   10.63    1.24
   0  -2   6    1.85    0.45
   0   2   6    1.79    0.58
   1  -2   6    1.11    0.41
   1   2   6    2.08    0.65
   2  -2   6    7.60    0.96
   2   2   6    7.32    0.67
   2   2   6    6.57    1.09
   3  -2   6    4.83    0.44
   3   2   6    5.09    1.06
   3   2   6    3.88    0.49
   4  -2   6  116.69    6.72
   4  -2   6  130.49    5.69
   4  -2   6  126.59    5.68
   4   2   6  119.22    6.54
   4   2   6  118.39    6.82
   5  -2   6    7.22    0.66
   5  -2   6    6.72    0.38
   5  -2   6    5.66    0.63
   5  -2   6    7.63    0.38
   5   2   6    5.25    0.69
   5   2   6    7.00    0.80
   6  -2   6   63.80    3.62
   6  -2   6   63.76    3.49
   6  -2   6   62.07    3.31
   6  -2   6   65.16    3.20
   6   2   6   59.67    3.36
   6   2   6   64.80    3.64
   6   2   6   63.25    3.74
   6   2   6   61.96    3.25
   7  -2   6   17.96    1.17
   7  -2   6   17.79    1.29
   7  -2   6   18.33    1.30
   7  -2   6   19.24    1.23
   7   2   6   15.56    1.26
   7   2   6   18.11    1.45
   7   2   6   16.62    1.26
   7   2   6   19.61    1.50
   8  -2   6   -0.09    0.34
   8  -2   6    0.27    0.43
  -8  -2  -6    0.11    0.30
   8  -2   6    0.30    0.41
   8  -2   6    0.12    0.38
   8   2   6    0.18    0.43
   8   2   6    0.02    0.56
   8   2   6    0.08    0.47
   8   2   6    0.42    0.35
   8   2   6    0.54    0.51
   9  -2   6    1.49    0.44
   9  -2   6    1.53    0.43
   9  -2   6    1.23    0.42
   9   2   6    1.84    0.28
   9   2   6    2.54    0.53
   9   2   6    1.42    0.29
   9   2   6    1.61    0.55
   9   2   6    1.65    0.46
   9   2   6    0.99    0.47
  10  -2   6    3.02    0.41
  10  -2   6    3.66    0.42
  10   2   6    2.55    0.48
 -10   2  -6    3.00    0.31
  10   2   6    2.23    0.44
  10   2   6    2.41    0.43
 -12  -3   6    7.43    0.57
  11  -3  -6    2.47    0.60
 -11  -3   6    1.65    0.40
  11  -3  -6    2.13    0.49
 -11   3   6    2.41    0.47
 -11   3   6    1.32    0.45
 -10  -3   6   -0.09    0.33
  10  -3  -6    0.04    0.54
  10  -3  -6   -0.11    0.48
 -10  -3   6    0.21    0.40
  10  -3  -6   -0.39    0.57
 -10  -3   6   -0.17    0.33
 -10   3   6    0.38    0.42
 -10   3   6   -0.10    0.46
 -10   3   6    0.17    0.52
  -9  -3   6    1.64    0.46
  -9  -3   6    0.83    0.42
   9  -3  -6    0.96    0.70
   9  -3  -6    1.38    0.58
  -9  -3   6    1.27    0.46
   9  -3  -6    1.15    0.65
  -9   3   6    1.54    0.60
  -9   3   6    0.92    0.55
  -9   3   6    0.90    0.47
  -9   3   6    1.06    0.48
  -9   3   6    1.46    0.67
  -8  -3   6   23.01    1.43
  -8  -3   6   21.58    1.37
  -8  -3   6   20.66    1.46
   8  -3  -6   22.16    1.76
   8  -3  -6   22.42    1.74
  -8  -3   6   21.22    1.49
   8  -3  -6   22.02    1.47
  -8   3   6   20.59    1.56
  -8   3   6   22.03    1.54
  -8   3   6   19.69    1.68
  -8   3   6   20.77    1.42
  -7  -3   6   18.01    0.92
   7  -3  -6   18.25    1.52
  -7  -3   6   16.93    1.15
  -7  -3   6   16.34    1.25
   7  -3  -6   18.35    1.47
  -7  -3   6   19.43    1.21
  -7  -3   6   18.51    1.28
  -7  -3   6   19.45    0.93
  -7   3   6   16.57    1.33
  -7   3   6   18.62    1.36
  -7   3   6   17.25    1.49
   6  -3  -6   -0.64    0.35
  -6  -3   6    0.07    0.12
   6  -3  -6    0.65    0.44
  -6  -3   6   -0.10    0.26
  -6  -3   6    0.18    0.25
  -6   3   6   -0.17    0.28
  -6   3   6    0.09    0.36
   5  -3  -6   22.83    1.61
  -5  -3   6   23.58    1.33
  -5  -3   6   22.97    1.41
  -5   3   6   21.65    1.45
  -5   3   6   23.17    1.58
  -4  -3   6   17.08    1.04
  -4   3   6   16.29    1.20
  -3  -3   6   42.68    3.08
  -3   3   6   41.08    3.40
  -2  -3   6    7.21    0.83
  -2   3   6    9.82    1.31
  -1  -3   6    6.95    0.76
  -1   3   6    6.94    1.12
   0  -3   6   63.10    4.21
   0   3   6   59.23    4.56
   1  -3   6    0.21    0.28
   1   3   6    0.45    0.51
   2  -3   6    6.80    0.87
   2   3   6    6.33    1.15
   2   3   6    7.19    0.69
   3   3   6   25.44    1.65
   4  -3   6    0.28    0.21
   4   3   6    0.14    0.30
   4   3   6    0.68    0.39
   5  -3   6   -0.40    0.24
   5  -3   6    0.13    0.24
   5   3   6   -0.22    0.34
   5   3   6    0.41    0.45
   6  -3   6   13.31    0.98
   6  -3   6   13.69    1.04
   6  -3   6   14.47    0.97
   6  -3   6   14.28    1.02
   6   3   6   14.78    1.09
   6   3   6   15.54    1.13
   6   3   6   13.20    1.22
   6   3   6   15.33    1.32
   7  -3   6   12.99    0.96
   7  -3   6   12.85    0.95
   7  -3   6   13.09    1.01
   7  -3   6   14.04    0.99
   7   3   6   13.60    1.28
   7   3   6   10.92    1.00
   7   3   6   12.43    1.21
   7   3   6   13.97    1.10
   8  -3   6    4.60    0.57
  -8  -3  -6    4.49    0.40
   8  -3   6    3.57    0.51
   8  -3   6    5.51    0.61
   8   3   6    3.24    0.76
   8   3   6    3.93    0.64
   8   3   6    3.82    0.62
   8   3   6    3.90    0.71
   9  -3   6    0.31    0.36
   9  -3   6   -0.02    0.34
   9   3   6    0.21    0.48
   9   3   6   -0.44    0.38
   9   3   6    0.76    0.30
   9   3   6    0.81    0.48
   9   3   6    0.47    0.43
  10  -3   6    1.13    0.30
  10  -3   6    1.19    0.32
  10   3   6    0.80    0.40
 -10   3  -6    0.84    0.25
  10   3   6    1.08    0.38
  10   3   6    0.90    0.38
 -12  -4   6    2.86    0.32
 -11  -4   6    3.28    0.45
  11  -4  -6    2.73    0.51
  11  -4  -6    3.93    0.57
  11  -4  -6    3.22    0.67
  10  -4  -6    0.14    0.51
  10  -4  -6    0.05    0.49
  10  -4  -6    0.17    0.48
  10  -4  -6   -0.36    0.55
 -10  -4   6    0.01    0.37
 -10   4   6   -0.22    0.49
 -10   4   6   -0.18    0.44
  -9  -4   6   41.55    2.28
   9  -4  -6   38.92    2.65
  -9  -4   6   40.47    2.26
  -9  -4   6   39.60    2.42
   9  -4  -6   41.26    2.34
   9  -4  -6   40.70    2.67
  -9   4   6   40.59    2.45
  -9   4   6   39.79    2.73
  -9   4   6   40.52    2.34
  -8  -4   6    0.38    0.43
   8  -4  -6    0.59    0.60
  -8  -4   6   -0.10    0.33
  -8  -4   6    0.15    0.33
   8  -4  -6   -0.08    0.54
  -8  -4   6    0.20    0.35
  -8   4   6   -0.04    0.48
  -8   4   6    0.20    0.55
  -7  -4   6   76.71    4.23
  -7  -4   6   71.96    3.87
   7  -4  -6   75.16    4.48
  -7  -4   6   77.02    4.00
   7  -4  -6   71.52    4.32
  -7   4   6   73.07    4.15
  -7   4   6   79.85    4.54
   6  -4  -6   96.50    5.67
  -6  -4   6  102.44    5.18
  -6  -4   6   98.16    5.45
   6  -4  -6   95.18    5.46
  -6   4   6   97.19    5.33
  -6   4   6  103.08    5.73
   5  -4  -6   24.73    1.68
  -5  -4   6   25.12    1.34
  -5  -4   6   22.53    1.42
  -5   4   6   23.41    1.65
  -4   4   6    6.41    0.70
  -3  -4   6    1.01    0.39
  -3   4   6    0.87    0.32
  -2  -4   6    2.51    0.47
  -1  -4   6    3.54    0.51
  -1   4   6    3.42    0.86
   0  -4   6    5.06    0.55
   0   4   6    3.81    0.88
   1  -4   6   23.20    1.74
   2  -4   6   11.69    1.09
   2   4   6   10.63    0.92
   3   4   6    2.88    0.46
   4  -4   6   58.75    3.74
  -4  -4  -6   54.93    3.36
   4   4   6   58.15    3.48
   4   4   6   63.05    3.40
   5  -4   6    4.40    0.47
  -5  -4  -6    5.74    0.78
   5   4   6    6.94    0.84
   5   4   6    6.15    0.78
   6  -4   6    3.50    0.44
   6  -4   6    4.14    0.47
   6  -4   6    3.59    0.46
   6   4   6    4.22    0.76
   6   4   6    3.83    0.59
   6   4   6    3.30    0.58
   6   4   6    4.12    0.73
   7  -4   6    3.35    0.48
   7  -4   6    3.19    0.46
   7  -4   6    4.52    0.51
  -7  -4  -6    3.97    0.40
   7   4   6    4.64    0.68
   7   4   6    4.91    0.82
   7   4   6    4.68    0.67
   7   4   6    3.83    0.79
   8  -4   6    2.01    0.41
   8  -4   6    2.30    0.44
   8   4   6    2.20    0.58
   8   4   6    1.13    0.64
   8   4   6    1.61    0.53
   8   4   6    1.75    0.58
   9  -4   6    3.14    0.44
   9  -4   6    4.45    0.46
   9   4   6    2.76    0.42
   9   4   6    3.18    0.55
   9   4   6    2.80    0.56
   9   4   6    3.09    0.56
   9   4   6    2.55    0.62
  10  -4   6    4.03    0.39
  10  -4   6    2.67    0.34
  10   4   6    3.47    0.48
  10   4   6    2.75    0.46
 -11  -5   6    0.65    0.30
  11  -5  -6    1.07    0.42
  11  -5  -6    0.80    0.46
  11  -5  -6    1.26    0.46
  10  -5  -6    7.88    0.97
  10  -5  -6    7.59    0.89
  10  -5  -6    5.99    0.75
 -10  -5   6    5.98    0.61
  10  -5  -6    5.76    0.72
 -10   5   6    6.62    0.93
 -10   5   6    7.23    0.74
   9  -5  -6   -0.17    0.54
  -9  -5   6    0.68    0.39
   9  -5  -6    0.45    0.64
   9  -5  -6   -0.14    0.52
   9  -5  -6   -0.31    0.55
  -9   5   6    0.79    0.51
  -9   5   6    0.18    0.60
   8  -5  -6   33.08    2.09
   8  -5  -6   35.85    2.38
   8  -5  -6   34.66    2.36
  -8  -5   6   35.06    1.89
  -8  -5   6   35.44    1.94
   8  -5  -6   31.46    2.08
  -8   5   6   34.35    2.42
  -8   5   6   34.31    2.13
   7  -5  -6    1.54    0.51
  -7  -5   6    2.30    0.31
  -7  -5   6    2.13    0.38
   7  -5  -6    2.43    0.68
   7  -5  -6    1.81    0.58
   7  -5  -6    2.02    0.20
  -7   5   6    1.73    0.52
  -7   5   6    2.35    0.66
   6  -5  -6   17.25    1.45
  -6  -5   6   17.43    1.02
   6  -5  -6   18.59    1.44
  -6   5   6   17.98    1.49
  -6   5   6   18.52    1.29
   5  -5  -6   18.33    1.45
   5  -5  -6   19.45    1.42
  -5   5   6   18.48    1.42
  -4   5   6   73.06    4.26
  -3  -5   6   30.46    1.47
  -3   5   6   27.12    1.88
  -2  -5   6    1.33    0.34
  -2  -5   6    1.30    0.14
  -1  -5   6   16.27    1.19
   0  -5   6  318.84   20.45
   1  -5   6   24.78    1.69
   1   5   6   20.78    1.51
   2   5   6    4.66    0.59
   3   5   6   47.99    2.90
  -4  -5  -6   13.40    1.21
   4  -5   6   13.81    1.25
   4   5   6   13.11    1.14
   4   5   6   14.01    1.18
  -5  -5  -6   13.09    1.24
   5   5   6   10.82    1.11
   5   5   6   12.88    1.21
   5   5   6   12.04    0.99
  -6  -5  -6    8.08    0.60
   6  -5   6    7.65    0.64
   6  -5   6    8.34    0.69
   6   5   6    7.38    0.93
   6   5   6    7.18    0.76
   6   5   6    6.87    0.94
   6   5   6    6.36    0.74
   7  -5   6    2.75    0.41
   7  -5   6    3.15    0.43
   7   5   6    2.86    0.59
   7   5   6    3.66    0.80
   7   5   6    2.76    0.72
   7   5   6    3.79    0.65
   8  -5   6    1.34    0.35
   8  -5   6    1.52    0.37
   8   5   6    2.28    0.55
   8   5   6    1.86    0.59
   8   5   6    1.96    0.62
   8   5   6    1.44    0.66
  -9  -5  -6    1.20    0.47
   9  -5   6    0.31    0.30
   9  -5   6    0.64    0.29
   9   5   6    0.39    0.42
   9   5   6    0.71    0.51
   9   5   6    0.46    0.44
  10  -5   6   13.50    0.78
  10   5   6   12.51    0.96
  10   5   6   14.08    0.89
  10   5   6   12.08    0.91
 -11  -6   6    0.68    0.26
  11  -6  -6    0.05    0.34
  11  -6  -6    0.26    0.35
  10  -6  -6   13.28    1.30
  10  -6  -6   16.08    1.15
 -10  -6   6   17.90    1.04
  10  -6  -6   16.33    1.29
  10  -6  -6   15.79    1.19
  10  -6  -6   14.47    0.94
 -10   6   6   15.63    1.17
   9  -6  -6   10.78    1.17
   9  -6  -6    9.73    1.08
   9  -6  -6    8.48    0.92
  -9  -6   6    9.55    0.79
   9  -6  -6    9.58    0.95
  -9   6   6   11.36    1.23
  -9   6   6   10.41    0.94
   8  -6  -6   17.67    1.50
   8  -6  -6   16.03    1.44
   8  -6  -6   17.18    1.30
  -8  -6   6   15.93    1.06
   8  -6  -6   15.35    1.24
  -8   6   6   16.47    1.54
  -8   6   6   15.80    1.23
   7  -6  -6    3.63    0.79
   7  -6  -6    3.82    0.69
   7  -6  -6    3.95    0.74
   7  -6  -6    3.12    0.58
  -7  -6   6    3.30    0.42
  -7   6   6    3.32    0.75
  -7   6   6    3.50    0.60
   6  -6  -6    8.20    0.93
   6  -6  -6    7.68    0.92
  -6   6   6    8.11    0.78
  -6   6   6    5.52    0.86
   5  -6  -6   84.96    4.75
   5  -6  -6   86.31    4.91
  -5   6   6   84.25    4.98
  -4  -6   6    1.00    0.25
   4  -6  -6    1.30    0.46
   4  -6  -6    1.19    0.46
  -4   6   6    1.14    0.44
  -3  -6   6   69.74    3.19
  -3   6   6   61.77    3.90
  -2  -6   6  238.62   10.37
  -2  -6   6  227.29   14.31
  -2   6   6  196.04   12.14
  -1   6   6   69.53    4.04
   0   6   6   29.46    1.91
   1   6   6    9.39    0.90
   2  -6   6   87.08    4.36
   2  -6   6   90.53    4.11
   2   6   6   79.93    4.93
  -3  -6  -6   12.62    1.17
   3  -6   6   15.17    0.85
   3  -6   6   14.25    1.33
   3   6   6   13.33    1.16
   3   6   6   16.28    1.27
   4  -6   6    9.09    0.64
   4  -6   6    8.57    1.03
  -4  -6  -6    7.67    0.90
   4   6   6    9.37    1.00
   4   6   6    8.44    0.98
  -5  -6  -6   69.36    3.65
  -5  -6  -6   71.94    3.72
  -5  -6  -6   68.86    3.97
   5   6   6   69.66    4.04
   5   6   6   71.38    4.16
   5   6   6   63.27    3.54
  -6  -6  -6   11.54    1.00
   6  -6   6    9.35    0.74
   6   6   6    8.00    1.04
   6   6   6   12.20    1.22
   6   6   6   12.00    1.00
  -7  -6  -6    0.74    0.46
   7  -6   6    0.96    0.32
   7   6   6    0.65    0.58
   7   6   6    0.52    0.65
   7   6   6    1.20    0.53
  -8  -6  -6   46.38    2.93
   8  -6   6   51.87    2.62
   8   6   6   50.99    2.72
   8   6   6   49.97    3.14
   8   6   6   51.56    3.10
  -9  -6  -6   -0.22    0.36
   9  -6   6    1.12    0.27
   9   6   6   -0.14    0.44
   9   6   6    0.49    0.44
   9   6   6    1.23    0.52
  10   6   6    0.98    0.33
  11  -7  -6   15.44    1.01
  11  -7  -6   15.60    0.96
 -11  -7   6   15.13    0.87
 -10  -7   6   -0.14    0.27
  10  -7  -6    0.54    0.19
  10  -7  -6    0.79    0.45
  10  -7  -6    0.28    0.47
  10  -7  -6    0.18    0.44
  10  -7  -6    0.07    0.17
 -10   7   6    0.13    0.41
   9  -7  -6   -0.15    0.47
  -9  -7   6   -0.32    0.29
   9  -7  -6   -0.11    0.52
   9  -7  -6   -0.98    0.48
   9  -7  -6   -0.89    0.51
   9  -7  -6    0.15    0.30
  -9   7   6   -0.11    0.57
  -8  -7   6    0.25    0.30
   8  -7  -6   -0.27    0.58
   8  -7  -6   -0.08    0.48
   8  -7  -6    0.36    0.59
   8  -7  -6    0.31    0.45
   8  -7  -6    0.01    0.54
  -8   7   6    0.88    0.63
  -8   7   6    0.28    0.44
  -7  -7   6   12.62    0.84
   7  -7  -6   13.05    1.17
   7  -7  -6   11.45    1.03
   7  -7  -6   10.76    1.17
   7  -7  -6   13.52    1.26
  -7   7   6   12.99    1.04
   6  -7  -6    0.29    0.48
  -6  -7   6    0.48    0.23
   6  -7  -6    0.95    0.51
   6  -7  -6    0.72    0.55
   6  -7  -6    1.12    0.43
  -6   7   6    1.61    0.47
   5  -7  -6    5.03    0.74
   5  -7  -6    4.92    0.76
   4  -7  -6  151.84    8.13
   4  -7  -6  137.77    7.64
   4  -7  -6  136.17    7.93
  -4  -7   6  144.78    6.78
   3  -7  -6   16.88    1.31
  -3  -7   6   17.21    0.89
   3  -7  -6   15.27    1.27
   1  -7   6   55.74    3.44
   1   7   6   50.21    3.18
   2  -7   6    0.36    0.12
  -2  -7  -6    0.81    0.38
   2  -7   6    0.62    0.47
   2   7   6    0.70    0.39
  -3  -7  -6    0.58    0.44
   3  -7   6    0.12    0.52
   3  -7   6    0.59    0.17
   3   7   6    1.51    0.52
   3   7   6    0.43    0.41
   4  -7   6   33.87    2.51
  -4  -7  -6   34.21    2.28
   4  -7   6   36.67    1.95
   4   7   6   39.35    2.42
   4   7   6   35.05    2.16
   4   7   6   37.01    2.38
  -5  -7  -6    7.97    0.81
  -5  -7  -6    9.91    1.05
   5   7   6    8.01    1.02
   5   7   6    8.41    0.80
   5   7   6    9.11    1.06
  -6  -7  -6   12.16    1.04
   6   7   6    9.69    1.14
   6   7   6   12.64    1.31
   6   7   6   12.23    1.03
  -7  -7  -6   42.72    2.50
   7   7   6   46.55    2.45
   7   7   6   41.78    2.84
   7   7   6   44.19    2.85
  -8  -7  -6    1.56    0.52
  -8  -7  -6    1.28    0.47
   8   7   6    3.00    0.63
   8   7   6    1.73    0.65
   8   7   6    2.08    0.56
   8   7   6    1.41    0.57
  -9  -7  -6   25.00    1.49
   9   7   6   24.51    1.44
   9   7   6   24.98    1.57
   9   7   6   24.29    1.68
  11  -8  -6    5.67    0.50
  11  -8  -6    5.51    0.52
  10  -8  -6    2.45    0.47
  10  -8  -6    2.04    0.50
  10  -8  -6    1.62    0.46
 -10  -8   6    1.77    0.28
 -10   8   6    1.65    0.44
   9  -8  -6    2.92    0.71
  -9  -8   6    3.44    0.41
   9  -8  -6    4.25    0.65
   9  -8  -6    3.26    0.59
   9  -8  -6    3.41    0.33
   9  -8  -6    3.34    0.59
   9  -8  -6    3.38    0.35
   8  -8  -6    2.34    0.62
  -8  -8   6    1.23    0.32
   8  -8  -6    1.61    0.64
   8  -8  -6    1.47    0.50
   8  -8  -6    1.93    0.68
   8  -8  -6    1.91    0.57
   8  -8  -6    1.38    0.36
   7  -8  -6   15.05    1.27
   7  -8  -6   13.39    1.11
   7  -8  -6   16.11    1.34
   7  -8  -6   11.22    1.22
   7  -8  -6   14.97    0.97
  -7  -8   6   14.74    0.90
   6  -8  -6    2.07    0.49
   6  -8  -6    2.20    0.59
   6  -8  -6    2.29    0.66
   6  -8  -6    1.56    0.58
   5  -8  -6    5.68    0.82
   5  -8  -6    6.18    0.78
   5  -8  -6    4.74    0.67
   5  -8  -6    5.07    0.61
   4  -8  -6    1.17    0.52
   4  -8  -6    1.67    0.55
  -4  -8   6    1.76    0.29
   4  -8  -6    1.14    0.50
   3  -8  -6    2.43    0.51
  -3  -8   6    2.60    0.27
   3  -8  -6    2.94    0.63
   2  -8  -6   13.45    1.08
   1  -8  -6    1.45    0.40
   1  -8  -6    2.11    0.54
  -1  -8   6    2.87    0.62
   0  -8  -6    4.35    0.68
   0  -8   6    5.22    0.76
   0  -8  -6    4.28    0.57
   1  -8   6    0.22    0.47
  -1  -8  -6    0.06    0.41
  -1  -8  -6    0.46    0.35
  -2  -8  -6   12.05    1.11
   2  -8   6   13.26    0.73
   2  -8   6   13.71    1.28
   3  -8   6   12.41    0.75
  -3  -8  -6   12.41    1.14
   3  -8   6   12.56    1.25
   3  -8   6   12.32    0.95
  -4  -8  -6   -0.07    0.37
   4  -8   6    0.56    0.58
  -4  -8  -6    0.66    0.49
   4  -8   6   -0.06    0.18
  -5  -8  -6    0.19    0.53
  -5  -8  -6   -0.32    0.38
   5   8   6    0.17    0.55
  -6  -8  -6    3.86    0.63
   6   8   6    4.03    0.82
   6   8   6    4.71    0.85
  -7  -8  -6   15.99    1.21
  -7  -8  -6   15.84    1.25
   7   8   6   17.31    1.52
   7   8   6   16.12    1.47
  -8  -8  -6    3.49    0.55
  -8  -8  -6    2.49    0.35
  -8  -8  -6    2.53    0.51
   8   8   6    1.85    0.66
   8   8   6    2.28    0.60
  -9  -8  -6    0.63    0.33
  10  -9  -6    5.49    0.58
  10  -9  -6    6.89    0.64
   9  -9  -6    5.14    0.74
   9  -9  -6    4.43    0.61
   9  -9  -6    4.41    0.68
   9  -9  -6    3.82    0.57
   9  -9  -6    4.44    0.58
   8  -9  -6    0.34    0.60
   8  -9  -6    0.40    0.23
   8  -9  -6    0.28    0.47
   8  -9  -6    0.36    0.22
   8  -9  -6   -0.04    0.41
   8  -9  -6    0.42    0.49
   8  -9  -6    0.54    0.56
   7  -9  -6    4.90    0.74
   7  -9  -6    3.31    0.59
   7  -9  -6    3.48    0.44
   7  -9  -6    2.41    0.69
   7  -9  -6    3.29    0.74
   6  -9  -6    0.54    0.56
   6  -9  -6   -0.56    0.52
   6  -9  -6   -0.01    0.39
   6  -9  -6   -0.19    0.51
   6  -9  -6    0.47    0.31
   5  -9  -6   -0.47    0.47
   5  -9  -6   -0.33    0.46
   5  -9  -6    0.16    0.30
   5  -9  -6   -0.22    0.48
   5  -9  -6    0.25    0.39
  -4  -9   6   10.65    0.68
   4  -9  -6   12.72    1.10
   4  -9  -6   10.65    0.97
  -4  -9   6   11.26    0.89
   4  -9  -6   10.52    0.88
   4  -9  -6   10.83    1.05
  -3  -9   6    5.55    0.39
   3  -9  -6    4.18    0.64
   2  -9  -6   24.40    1.71
   2  -9  -6   26.76    1.87
  -2  -9   6   26.75    1.93
   1  -9  -6   14.10    1.26
   1  -9  -6   14.39    1.13
  -1  -9   6   15.10    1.37
   0  -9   6    0.37    0.48
   0  -9  -6    0.50    0.38
   0  -9  -6   -0.20    0.43
  -1  -9  -6   20.83    1.67
  -1  -9  -6   22.66    1.53
   1  -9   6   24.02    1.79
   2  -9   6    2.21    0.21
  -2  -9  -6    2.47    0.54
   2  -9   6    2.04    0.45
   2  -9   6    1.77    0.63
   3  -9   6   26.35    1.64
   3  -9   6   25.19    1.36
  -3  -9  -6   22.88    1.52
   3  -9   6   22.53    1.72
  -3  -9  -6   25.07    1.73
   3  -9   6   25.12    1.98
   3  -9   6   27.11    1.56
   4  -9   6    0.95    0.64
   4  -9   6    1.92    0.28
  -4  -9  -6    1.58    0.45
  -4  -9  -6    1.29    0.54
   4  -9   6    2.12    0.48
  -5  -9  -6    3.96    0.72
  -5  -9  -6    2.46    0.52
  -6  -9  -6    2.73    0.41
  -6  -9  -6    4.36    0.63
  -7  -9  -6    1.99    0.34
  -7  -9  -6    1.69    0.48
  -7  -9  -6    1.91    0.49
  -8  -9  -6    1.42    0.17
  -8  -9  -6    1.13    0.38
  -8  -9  -6    0.84    0.40
  -9  -9  -6    2.45    0.38
  10 -10  -6    2.57    0.37
  10 -10  -6    2.97    0.41
 -10  10   6    2.28    0.41
   9 -10  -6   15.65    1.05
   9 -10  -6   16.35    1.13
   9 -10  -6   14.62    1.21
   9 -10  -6   15.76    1.10
   8 -10  -6    7.34    0.83
   8 -10  -6    8.08    0.93
   8 -10  -6    7.02    0.74
   8 -10  -6    7.59    0.77
   8 -10  -6    8.44    0.82
   7 -10  -6    3.81    0.75
   7 -10  -6    4.87    0.77
   7 -10  -6    4.64    0.33
   7 -10  -6    4.86    0.66
   7 -10  -6    6.38    0.73
   7 -10  -6    5.05    0.33
   6 -10  -6    1.09    0.45
   6 -10  -6    0.91    0.59
   6 -10  -6    0.83    0.52
   6 -10  -6    0.43    0.55
   6 -10  -6    1.15    0.28
  -5 -10   6   26.57    1.68
   5 -10  -6   30.52    1.92
   5 -10  -6   26.47    1.69
   5 -10  -6   27.01    1.87
   5 -10  -6   27.17    1.48
   5 -10  -6   31.55    1.95
  -5 -10   6   27.89    1.51
   4 -10  -6    8.26    0.62
   4 -10  -6    8.63    0.90
  -4 -10   6    7.49    0.74
  -4 -10   6    8.20    0.78
   4 -10  -6    8.37    0.77
  -4 -10   6    8.16    0.57
   4 -10  -6    8.59    0.88
   4 -10  -6    7.99    0.88
   3 -10  -6   20.70    1.15
  -3 -10   6   19.94    1.36
  -3 -10   6   20.91    1.31
   3 -10  -6   18.55    1.28
   3 -10  -6   19.88    1.41
   3 -10  -6   21.67    1.49
  -3 -10   6   20.12    1.06
  -2 -10   6   43.88    2.02
  -2 -10   6   43.30    2.88
   2 -10  -6   43.40    2.52
   2 -10  -6   41.35    2.13
  -2 -10   6   38.51    2.14
  -2 -10   6   40.77    2.32
  -2 -10   6   44.51    2.02
   1 -10  -6    5.38    0.50
  -1 -10   6    6.24    0.62
   1 -10  -6    5.54    0.68
  -1 -10   6    5.25    0.83
   0 -10  -6   56.83    3.31
   0 -10   6   62.46    3.85
   0 -10   6   57.25    3.11
  -1 -10  -6    7.66    0.62
   1 -10   6    8.61    1.09
   1 -10   6    8.25    0.90
   1 -10   6    9.75    0.80
  -1 -10  -6    7.87    0.75
  -1 -10  -6    7.65    0.82
   1 -10   6    8.35    0.78
  -2 -10  -6    2.28    0.46
   2 -10   6    2.04    0.21
   2 -10   6    1.78    0.52
  -2 -10  -6    1.85    0.50
   2 -10   6    2.14    0.48
  -2 -10  -6    1.91    0.36
   2 -10   6    1.72    0.66
   2 -10   6    2.86    0.52
   3 -10   6   91.92    4.58
   3 -10   6   89.23    5.53
  -3 -10  -6   79.08    4.59
  -3 -10  -6   87.25    4.27
   3 -10   6   90.41    4.50
  -3 -10  -6   93.83    4.89
   3 -10   6   95.79    4.95
   3 -10   6   79.70    5.30
   4 -10   6    1.02    0.67
   4 -10   6    1.12    0.24
   4 -10   6    0.65    0.45
  -4 -10  -6    1.79    0.57
  -4 -10  -6    1.05    0.45
  -4 -10  -6    1.09    0.32
  -5 -10  -6   20.68    1.38
   5 -10   6   20.41    1.73
  -5 -10  -6   20.61    1.16
  -6 -10  -6    0.53    0.27
  -6 -10  -6    0.89    0.46
  -7 -10  -6   25.11    1.51
  -7 -10  -6   23.07    1.50
  -8 -10  -6   16.32    1.08
  -9 -10  -6    4.87    0.46
  -9 -11   6    1.05    0.35
   9 -11  -6    1.84    0.39
   9 -11  -6    1.01    0.46
   9 -11  -6    1.19    0.38
   8 -11  -6   10.18    0.84
   8 -11  -6   11.57    1.05
   8 -11  -6   10.23    0.90
   8 -11  -6   10.45    0.92
  -8 -11   6   10.49    0.85
  -7 -11   6    1.84    0.49
   7 -11  -6    1.58    0.53
   7 -11  -6    1.52    0.64
   7 -11  -6    1.52    0.43
   7 -11  -6    1.67    0.55
   7 -11  -6    2.08    0.50
  -6 -11   6   14.22    1.11
   6 -11  -6   13.07    1.31
   6 -11  -6   16.44    1.19
   6 -11  -6   16.62    1.26
   6 -11  -6   14.64    1.10
   6 -11  -6   13.06    1.27
   5 -11  -6    2.20    0.63
   5 -11  -6    3.52    0.27
   5 -11  -6    2.89    0.52
   5 -11  -6    3.50    0.29
  -5 -11   6    2.30    0.52
   5 -11  -6    3.89    0.63
   5 -11  -6    3.77    0.68
  -5 -11   6    3.38    0.43
  -4 -11   6   30.50    1.84
   4 -11  -6   31.16    2.05
  -4 -11   6   31.63    1.63
   4 -11  -6   32.00    2.03
   4 -11  -6   30.52    2.05
   4 -11  -6   29.01    1.84
   4 -11  -6   31.84    1.58
   4 -11  -6   34.34    1.58
  -3 -11   6   40.22    1.98
  -3 -11   6   40.79    2.26
   3 -11  -6   36.46    2.43
   3 -11  -6   41.95    2.44
   3 -11  -6   44.38    2.49
   3 -11  -6   40.28    1.98
   3 -11  -6   38.00    2.22
  -3 -11   6   37.87    2.37
  -2 -11   6   64.84    3.85
  -2 -11   6   72.74    3.25
  -2 -11   6   70.48    4.20
   2 -11  -6   70.90    3.82
  -2 -11   6   70.55    3.60
  -2 -11   6   75.75    4.39
   2 -11  -6   63.90    3.88
   2 -11  -6   63.44    3.58
   2 -11  -6   68.19    3.29
  -2 -11   6   63.75    3.44
  -1 -11   6   37.46    2.09
  -1 -11   6   37.91    2.44
  -1 -11   6   42.11    2.68
   1 -11  -6   33.91    2.21
  -1 -11   6   35.16    2.21
   1 -11  -6   36.94    2.23
   1 -11  -6   35.59    1.84
   1 -11  -6   36.21    2.06
   0 -11   6   26.35    1.61
   0 -11  -6   25.00    1.57
   0 -11  -6   29.50    1.76
   0 -11   6   28.96    2.14
   0 -11   6   25.63    1.86
   0 -11  -6   27.92    1.40
   0 -11   6   24.82    1.69
   0 -11  -6   24.37    1.66
   1 -11   6    5.69    0.34
  -1 -11  -6    6.19    0.50
  -1 -11  -6    4.61    0.59
   1 -11   6    6.65    0.69
   1 -11   6    5.33    0.67
   1 -11   6    5.21    0.90
   1 -11   6    4.95    0.72
  -1 -11  -6    7.05    0.76
   2 -11   6    0.27    0.46
  -2 -11  -6   -0.15    0.23
  -2 -11  -6    0.15    0.35
   2 -11   6   -0.13    0.64
   2 -11   6    0.17    0.42
   2 -11   6    1.05    0.46
   2 -11   6    0.33    0.14
  -2 -11  -6   -0.23    0.43
  -3 -11  -6   13.72    1.16
   3 -11   6   11.36    0.98
   3 -11   6   13.66    1.09
  -3 -11  -6   12.69    1.01
   3 -11   6   12.75    0.77
  -3 -11  -6   12.85    0.78
   3 -11   6   11.95    1.13
   3 -11   6   10.82    1.28
   4 -11   6   24.27    1.35
  -4 -11  -6   25.80    1.56
   4 -11   6   22.38    1.69
  -4 -11  -6   22.85    1.67
   4 -11   6   25.94    2.02
  -4 -11  -6   24.23    1.27
  -5 -11  -6    8.90    0.54
  -5 -11  -6    9.02    0.86
  -5 -11  -6    8.89    0.54
  -6 -11  -6   13.07    1.01
  -6 -11  -6   11.53    0.91
  -7 -11  -6   34.81    1.98
  -7 -11  -6   36.19    2.01
  -8 -11  -6    0.39    0.29
   9 -12  -6    7.10    0.57
   9 -12  -6    6.91    0.54
   9 -12  -6    6.89    0.68
   8 -12  -6    0.70    0.51
  -8 -12   6    0.97    0.39
   8 -12  -6    0.58    0.37
   8 -12  -6   -0.12    0.35
   7 -12  -6    3.54    0.51
   7 -12  -6    1.88    0.63
  -7 -12   6    2.82    0.52
   7 -12  -6    1.86    0.56
   7 -12  -6    2.14    0.45
   6 -12  -6    3.17    0.58
   6 -12  -6    2.99    0.46
   6 -12  -6    2.65    0.68
   6 -12  -6    3.00    0.64
   6 -12  -6    3.03    0.51
  -6 -12   6    2.79    0.53
  -5 -12   6   14.32    0.91
  -5 -12   6   14.54    1.11
   5 -12  -6   14.03    1.29
   5 -12  -6   15.30    1.20
   5 -12  -6   14.17    1.10
   5 -12  -6   15.28    1.29
   5 -12  -6   15.39    1.08
   4 -12  -6    3.31    0.67
  -4 -12   6    3.05    0.56
   4 -12  -6    2.80    0.52
   4 -12  -6    2.86    0.58
  -4 -12   6    2.28    0.35
   4 -12  -6    1.75    0.46
  -3 -12   6    2.65    0.53
  -3 -12   6    1.77    0.47
   3 -12  -6    2.15    0.52
   3 -12  -6    2.37    0.51
   3 -12  -6    1.39    0.56
  -3 -12   6    2.16    0.30
   3 -12  -6    1.99    0.44
   2 -12  -6   23.91    1.53
   2 -12  -6   23.57    1.67
  -2 -12   6   26.29    1.58
   2 -12  -6   26.51    1.67
  -2 -12   6   27.04    1.84
  -2 -12   6   23.25    1.63
  -2 -12   6   24.02    1.34
  -2 -12   6   27.84    2.00
  -2 -12   6   26.34    1.28
   2 -12  -6   27.72    1.71
  -1 -12   6    1.09    0.44
  -1 -12   6    1.02    0.51
  -1 -12   6    1.61    0.70
   1 -12  -6    0.79    0.37
  -1 -12   6    1.49    0.45
   1 -12  -6    0.90    0.46
  -1 -12   6    1.27    0.14
   1 -12  -6    1.55    0.48
   0 -12   6   41.13    2.80
   0 -12  -6   44.09    2.03
   0 -12  -6   43.75    2.55
   0 -12   6   44.04    2.42
   0 -12   6   43.80    3.02
   0 -12   6   40.80    2.56
   0 -12  -6   39.55    2.36
   0 -12  -6   45.42    2.03
  -1 -12  -6   10.50    0.90
   1 -12   6   10.29    0.96
  -1 -12  -6   11.49    0.57
   1 -12   6   11.55    0.94
   1 -12   6   10.85    1.08
   1 -12   6   10.40    0.61
   1 -12   6    9.64    1.24
  -1 -12  -6   11.87    1.02
   2 -12   6   15.77    1.41
   2 -12   6   18.00    1.26
  -2 -12  -6   16.95    1.20
   2 -12   6   19.03    1.74
   2 -12   6   17.30    0.96
   2 -12   6   18.83    1.31
  -2 -12  -6   17.08    1.31
   3 -12   6    5.09    0.71
   3 -12   6    4.69    0.40
  -3 -12  -6    4.12    0.58
   3 -12   6    4.66    0.44
   3 -12   6    4.26    0.62
   3 -12   6    6.50    0.73
   3 -12   6    4.25    0.89
  -3 -12  -6    5.50    0.71
   4 -12   6   19.14    1.77
   4 -12   6   23.34    1.21
  -4 -12  -6   22.22    1.40
   4 -12   6   19.79    1.54
   4 -12   6   20.50    1.18
  -5 -12  -6    4.39    0.59
  -5 -12  -6    5.82    0.57
   5 -12   6    4.57    0.44
  -6 -12  -6    9.98    0.85
  -6 -12  -6   10.43    0.73
  -7 -12  -6    0.35    0.33
  -8 -12  -6   14.30    0.87
   8 -13  -6    9.49    0.64
   8 -13  -6    8.72    0.68
  -8 -13   6    9.15    0.70
   8 -13  -6    8.79    0.83
  -7 -13   6   23.70    1.35
   7 -13  -6   22.67    1.31
   7 -13  -6   18.03    1.50
   7 -13  -6   21.06    1.53
   7 -13  -6   23.18    1.32
   6 -13  -6   -0.30    0.35
  -6 -13   6    0.06    0.40
   6 -13  -6    0.03    0.55
   6 -13  -6    0.20    0.33
   6 -13  -6    0.20    0.49
   5 -13  -6   -0.44    0.51
  -5 -13   6    0.66    0.46
   5 -13  -6    0.76    0.41
   5 -13  -6    0.67    0.39
   5 -13  -6    0.25    0.58
  -5 -13   6    1.17    0.32
   4 -13  -6    3.67    0.55
   4 -13  -6    3.46    0.52
  -4 -13   6    2.67    0.55
   4 -13  -6    3.35    0.68
   4 -13  -6    2.56    0.66
  -4 -13   6    3.25    0.38
   3 -13  -6    5.96    0.62
   3 -13  -6    5.53    0.74
   3 -13  -6    5.08    0.64
  -3 -13   6    4.96    0.65
   3 -13  -6    6.18    0.60
   3 -13  -6    7.18    0.89
  -3 -13   6    5.77    0.65
  -3 -13   6    4.44    0.43
   2 -13  -6    6.57    0.78
  -2 -13   6    7.01    0.98
   2 -13  -6    8.43    0.78
  -2 -13   6    6.24    0.45
  -2 -13   6    8.16    0.90
   2 -13  -6    7.65    0.70
  -2 -13   6    6.87    0.47
  -2 -13   6    7.78    0.76
  -2 -13   6    8.27    0.78
   2 -13  -6    6.80    0.87
   2 -13  -6    7.31    0.70
   1 -13  -6    1.14    0.43
   1 -13  -6    1.23    0.49
   1 -13  -6    0.96    0.39
  -1 -13   6    1.12    0.66
  -1 -13   6    0.77    0.51
  -1 -13   6    1.29    0.49
  -1 -13   6    1.16    0.46
  -1 -13   6    0.77    0.14
   1 -13  -6    1.18    0.54
   1 -13  -6    1.53    0.47
  -1 -13   6    0.83    0.19
   0 -13  -6    1.38    0.46
   0 -13  -6    1.70    0.56
   0 -13   6    1.73    0.52
   0 -13   6    1.40    0.72
   0 -13  -6    1.11    0.41
   0 -13   6    1.08    0.57
   0 -13   6    1.18    0.19
   0 -13   6    1.42    0.46
   1 -13   6    1.32    0.17
   1 -13   6    0.66    0.47
  -1 -13  -6    1.60    0.46
  -1 -13  -6    1.01    0.40
   1 -13   6    0.95    0.22
   1 -13   6    1.11    0.57
   1 -13   6    2.25    0.78
   1 -13   6    1.93    0.53
   2 -13   6    5.14    0.69
  -2 -13  -6    8.56    0.76
   2 -13   6    5.23    0.78
   2 -13   6    6.99    0.73
  -2 -13  -6    6.12    0.66
   2 -13   6    6.10    0.45
   2 -13   6    5.85    0.46
   2 -13   6    6.48    1.02
  -3 -13  -6    3.48    0.53
   3 -13   6    3.18    0.38
   3 -13   6    3.57    0.80
   3 -13   6    3.96    0.67
  -3 -13  -6    4.40    0.58
   3 -13   6    3.37    0.32
  -4 -13  -6   10.30    0.83
   4 -13   6    8.77    0.62
   4 -13   6    8.67    0.59
   4 -13   6    8.12    1.01
   4 -13   6    9.11    0.90
  -5 -13  -6    0.36    0.36
   5 -13   6    0.08    0.17
  -6 -13  -6    2.69    0.42
  -7 -13  -6    0.59    0.27
   8 -14  -6    0.12    0.33
   7 -14  -6   13.40    1.08
   7 -14  -6   14.67    0.84
   7 -14  -6   13.77    0.89
  -7 -14   6   14.58    0.95
   7 -14  -6   13.66    1.09
   6 -14  -6   -0.48    0.52
   6 -14  -6    0.27    0.30
   6 -14  -6    0.29    0.46
  -6 -14   6    0.22    0.39
  -5 -14   6    0.54    0.42
   5 -14  -6    0.80    0.53
   5 -14  -6   -0.05    0.52
   5 -14  -6    0.06    0.32
  -4 -14   6    2.96    0.36
   4 -14  -6    4.57    0.52
   4 -14  -6    3.51    0.68
  -4 -14   6    3.19    0.54
   4 -14  -6    3.48    0.65
   3 -14  -6    5.65    0.74
  -3 -14   6    5.97    0.47
   3 -14  -6    7.33    0.89
   3 -14  -6    5.14    0.59
   3 -14  -6    7.07    0.64
  -3 -14   6    6.07    0.70
   2 -14  -6   18.90    1.23
  -2 -14   6   18.55    1.32
  -2 -14   6   20.78    1.50
  -2 -14   6   19.47    1.65
   2 -14  -6   20.16    1.40
   2 -14  -6   19.40    1.54
   2 -14  -6   18.66    1.24
  -2 -14   6   17.82    0.99
  -2 -14   6   21.09    1.32
  -1 -14   6    3.80    0.69
  -1 -14   6    3.51    0.29
  -1 -14   6    2.98    0.77
  -1 -14   6    4.10    0.61
   1 -14  -6    3.60    0.50
  -1 -14   6    3.16    0.27
  -1 -14   6    2.53    0.53
   1 -14  -6    3.20    0.51
   1 -14  -6    4.48    0.72
   0 -14   6    0.35    0.68
   0 -14   6    0.75    0.18
   0 -14   6    1.12    0.50
   0 -14   6    0.60    0.13
   0 -14   6    0.69    0.14
   0 -14   6    0.67    0.55
   0 -14   6    0.64    0.44
   0 -14  -6    1.29    0.40
   0 -14  -6    0.94    0.39
   1 -14   6    1.99    0.26
  -1 -14  -6    2.48    0.46
  -1 -14  -6    2.15    0.45
   1 -14   6    3.29    0.82
   1 -14   6    2.52    0.53
   1 -14   6    2.28    0.22
   1 -14   6    2.91    0.55
   1 -14   6    2.98    0.66
  -2 -14  -6    0.76    0.37
   2 -14   6    0.43    0.15
   2 -14   6    0.42    0.46
   2 -14   6    0.66    0.51
   2 -14   6    0.28    0.63
  -2 -14  -6    0.25    0.36
   2 -14   6    0.05    0.21
   3 -14   6    7.17    0.49
   3 -14   6    7.98    0.85
   3 -14   6    8.26    1.01
  -3 -14  -6    8.98    0.74
   3 -14   6    6.61    0.51
  -4 -14  -6    3.27    0.46
   4 -14   6    1.78    0.31
   4 -14   6    2.40    0.53
   4 -14   6    2.43    0.26
   4 -14   6    2.70    0.64
   5 -14   6    0.15    0.14
  -5 -14  -6    0.34    0.31
  -6 -14  -6   -0.17    0.25
  -7 -15   6    1.39    0.30
   7 -15  -6    1.21    0.39
   6 -15  -6   -0.20    0.25
  -6 -15   6    0.00    0.31
   6 -15  -6    0.67    0.46
   6 -15  -6    0.32    0.42
   5 -15  -6    2.61    0.58
   5 -15  -6    3.11    0.39
   5 -15  -6    2.38    0.56
  -5 -15   6    3.44    0.49
   4 -15  -6   53.37    3.24
  -4 -15   6   45.81    2.50
  -4 -15   6   51.18    2.73
   4 -15  -6   52.31    2.67
   4 -15  -6   53.95    3.00
  -3 -15   6    0.24    0.22
   3 -15  -6    0.20    0.54
  -3 -15   6    0.48    0.43
   3 -15  -6    0.81    0.32
   3 -15  -6    0.46    0.49
  -2 -15   6    0.16    0.47
  -2 -15   6   -0.18    0.35
   2 -15  -6    0.03    0.30
  -2 -15   6    0.46    0.44
  -2 -15   6   -0.05    0.18
   2 -15  -6   -0.47    0.43
   2 -15  -6    0.48    0.54
  -1 -15   6    3.80    0.58
  -1 -15   6    3.50    0.27
  -1 -15   6    4.39    0.57
   1 -15  -6    3.66    0.67
   1 -15  -6    3.57    0.46
  -1 -15   6    4.54    0.69
  -1 -15   6    4.00    0.31
   0 -15   6    0.68    0.53
   0 -15  -6    0.40    0.32
   0 -15   6    0.55    0.12
   0 -15   6    0.47    0.66
   0 -15   6    0.20    0.40
   0 -15   6    0.23    0.46
   0 -15   6    0.57    0.17
   0 -15   6    0.63    0.12
   1 -15   6    3.02    0.24
   1 -15   6    2.75    0.23
   1 -15   6    3.05    0.75
   1 -15   6    3.68    0.57
  -1 -15  -6    3.52    0.46
   1 -15   6    3.80    0.65
   1 -15   6    2.97    0.26
  -2 -15  -6    0.23    0.32
   2 -15   6    0.08    0.12
   2 -15   6    0.15    0.57
   2 -15   6    0.45    0.41
   2 -15   6    0.18    0.18
   2 -15   6    0.17    0.47
  -3 -15  -6    7.50    0.64
   3 -15   6    6.88    0.45
   3 -15   6    6.77    0.75
   3 -15   6    6.81    0.46
   4 -15   6   14.68    1.12
   4 -15   6   13.97    0.85
  -4 -15  -6   18.17    0.97
  -5 -15  -6    1.41    0.28
   6 -16  -6    5.80    0.60
   6 -16  -6    6.03    0.58
  -6 -16   6    6.07    0.52
   5 -16  -6    2.42    0.47
  -5 -16   6    1.98    0.38
   5 -16  -6    1.78    0.49
   5 -16  -6    2.47    0.28
   4 -16  -6    0.68    0.43
   4 -16  -6    0.52    0.48
   4 -16  -6    0.58    0.25
  -4 -16   6    0.98    0.36
   3 -16  -6    3.34    0.36
  -3 -16   6    3.05    0.47
   3 -16  -6    3.10    0.64
   3 -16  -6    2.86    0.52
   2 -16  -6   28.27    1.49
  -2 -16   6   27.58    1.58
  -2 -16   6   27.67    1.81
   2 -16  -6   29.21    1.89
  -2 -16   6   23.93    1.32
  -1 -16   6   16.85    0.93
  -1 -16   6   18.04    0.90
  -1 -16   6   19.12    1.19
   1 -16  -6   20.56    1.08
  -1 -16   6   20.15    1.37
   1 -16  -6   21.09    1.41
  -1 -16   6   15.11    0.93
   0 -16   6    3.19    0.49
   0 -16   6    2.94    0.21
   0 -16  -6    4.25    0.42
   0 -16   6    2.87    0.21
   0 -16   6    4.14    0.63
   1 -16   6    6.76    0.63
   1 -16   6    5.85    0.39
   1 -16   6    7.17    0.40
  -1 -16  -6    9.31    0.60
   1 -16   6    8.76    0.84
  -2 -16  -6    4.08    0.41
   2 -16   6    3.23    0.55
   2 -16   6    3.51    0.25
  -3 -16  -6    0.33    0.24
   3 -16   6    0.02    0.38
   4 -16   6    1.10    0.35
  -4 -16  -6    1.09    0.23
   5 -17  -6    3.55    0.47
  -4 -17   6    6.66    0.55
   4 -17  -6    5.29    0.62
   3 -17  -6    7.46    0.77
  -3 -17   6    7.11    0.62
  -2 -17   6   -0.61    0.29
   2 -17  -6    0.10    0.40
  -2 -17   6    0.15    0.34
   1 -17  -6    4.79    0.59
  -1 -17   6    3.96    0.48
  -1 -17   6    3.97    0.56
   0 -17   6   11.70    0.97
   0 -17   6   11.21    0.82
   0 -17  -6   12.49    0.71
   1 -17   6    3.05    0.50
  -1 -17  -6    3.25    0.30
   1 -17   6    2.95    0.39
   2 -17   6    1.47    0.41
   3 -17   6    3.66    0.45
  -2 -18   6    0.34    0.24
  -1 -18   6    1.40    0.29
  -1 -18   6    1.17    0.32
   0 -18   6    3.66    0.37
   0 -18   6    3.73    0.45
   1 -18   6    8.09    0.68
 -12   0   7    0.05    0.25
 -11   0   7    0.12    0.35
 -11   0   7   -0.25    0.29
 -10   0   7    0.01    0.39
 -10   0   7   -0.10    0.42
 -10   0   7   -0.17    0.43
 -10   0   7    0.16    0.17
 -10   0   7   -0.06    0.15
  -9   0   7    0.00    0.57
  -9   0   7   -0.31    0.44
  -9   0   7    0.25    0.28
  -9   0   7   -0.48    0.41
  -9   0   7   -0.57    0.44
  -8   0   7    0.09    0.39
  -8   0   7   -0.03    0.50
  -8   0   7   -0.67    0.41
  -8   0   7    0.10    0.43
  -8   0   7    0.16    0.28
  -8   0   7    0.22    0.39
  -7   0   7   -0.02    0.38
  -7   0   7    0.41    0.38
  -7   0   7   -0.21    0.24
  -7   0   7    0.37    0.48
  -7   0   7   -0.10    0.33
  -7   0   7   -0.13    0.34
  -6   0   7   -0.57    0.26
  -6   0   7   -0.05    0.31
  -6   0   7    0.17    0.22
  -6   0   7    0.13    0.40
  -5   0   7    0.17    0.27
  -5   0   7   -0.08    0.24
  -5   0   7   -0.05    0.19
  -4   0   7    0.54    0.24
  -4   0   7   -0.17    0.22
  -4   0   7    0.49    0.52
  -3   0   7    0.17    0.41
  -3   0   7    0.13    0.19
  -2   0   7   -0.02    0.38
  -1   0   7    0.02    0.38
   0   0   7   -0.05    0.35
   1   0   7    0.17    0.41
   1   0   7   -0.09    0.18
   2   0   7    0.26    0.45
   2   0   7    0.10    0.21
   3   0   7    0.10    0.24
   3   0   7   -0.13    0.16
   4   0   7   -0.03    0.19
   4   0   7   -0.25    0.29
   4   0   7   -0.41    0.27
   5   0   7   -0.20    0.35
   5   0   7   -0.04    0.33
   5   0   7    0.28    0.22
   5   0   7    0.41    0.33
   6   0   7    0.38    0.39
   6   0   7    0.02    0.43
   6   0   7    0.23    0.37
   6   0   7    0.08    0.22
   6   0   7    0.01    0.23
   6   0   7    0.03    0.40
   7   0   7    0.61    0.42
   7   0   7    0.16    0.42
   7   0   7    0.19    0.42
   7   0   7   -0.06    0.14
   7   0   7   -0.20    0.43
   8   0   7    0.00    0.38
   8   0   7   -0.47    0.43
   8   0   7    0.21    0.41
   8   0   7    0.24    0.43
   9   0   7    0.52    0.39
  -9   0  -7   -0.04    0.26
   9   0   7    0.11    0.37
   9   0   7   -0.16    0.37
  10   0   7    0.37    0.34
  10   0   7    0.33    0.28
  10   0   7   -0.04    0.27
 -12  -1   7    0.56    0.27
 -12   1   7    1.07    0.28
 -11  -1   7    3.15    0.48
 -11   1   7    2.88    0.49
 -11   1   7    4.36    0.54
  10  -1  -7    2.41    0.24
 -10  -1   7    2.18    0.52
 -10  -1   7    2.45    0.47
 -10  -1   7    1.78    0.48
 -10   1   7    2.66    0.36
 -10   1   7    1.90    0.51
 -10   1   7    1.76    0.50
 -10   1   7    2.13    0.58
  -9  -1   7    1.95    0.63
  -9  -1   7    1.36    0.25
  -9  -1   7    2.05    0.52
  -9  -1   7    2.15    0.54
  -9  -1   7    1.49    0.52
  -9   1   7    2.14    0.54
  -9   1   7    1.06    0.57
  -9   1   7    1.47    0.37
  -9   1   7    1.05    0.49
  -9   1   7    2.15    0.67
  -9   1   7    1.61    0.54
  -8  -1   7    5.35    0.70
  -8  -1   7    7.50    0.83
  -8  -1   7    6.90    0.56
  -8  -1   7    8.97    0.83
  -8  -1   7    8.30    0.88
  -8  -1   7    6.33    0.68
  -8   1   7    8.58    0.80
  -8   1   7    9.14    0.90
  -8   1   7    7.66    0.85
  -8   1   7    5.78    0.71
  -8   1   7    4.84    0.80
  -7  -1   7   13.89    1.11
  -7  -1   7   15.19    1.19
  -7  -1   7   14.99    0.90
  -7  -1   7   15.87    1.15
  -7  -1   7   17.01    1.23
  -7  -1   7   14.85    1.05
  -7   1   7   13.65    1.25
  -7   1   7   17.48    1.13
  -7   1   7   12.69    1.09
  -7   1   7   17.92    1.30
  -7   1   7   15.18    1.19
  -6  -1   7    8.46    0.80
  -6  -1   7    7.14    0.55
  -6  -1   7    9.98    0.86
  -6  -1   7    8.33    0.77
  -6   1   7    8.64    0.80
  -6   1   7    6.88    0.79
  -6   1   7    9.73    0.88
  -5  -1   7    6.70    0.60
  -5  -1   7    5.34    0.42
  -5  -1   7    5.68    0.60
  -5   1   7    7.00    0.65
  -5   1   7    6.17    0.67
  -4  -1   7    0.92    0.25
  -4  -1   7    1.12    0.27
  -4   1   7    1.01    0.64
  -4   1   7    0.19    0.23
  -4   1   7    0.78    0.27
  -3  -1   7    0.80    0.47
  -3  -1   7    0.44    0.20
  -3   1   7    0.42    0.25
  -3   1   7    0.25    0.46
  -2  -1   7   57.27    4.45
  -2   1   7   70.16    4.67
  -2   1   7   61.84    3.52
  -1  -1   7   16.19    1.49
  -1   1   7   16.19    1.58
   0  -1   7   97.26    6.54
   0   1   7   93.39    6.64
   1  -1   7   46.29    3.44
   1   1   7   46.24    3.57
   1   1   7   46.61    2.68
   2  -1   7    1.45    0.27
   2   1   7    0.65    0.54
   2   1   7    1.33    0.31
   3  -1   7   43.03    1.99
   3  -1   7   41.92    1.99
   3  -1   7   42.93    2.42
   3   1   7   38.48    2.46
   4  -1   7   17.66    1.19
   4  -1   7   17.70    1.20
   4  -1   7   17.64    0.91
   4  -1   7   18.39    0.91
   4   1   7   18.58    1.05
   4   1   7   17.11    1.25
   4   1   7   16.74    1.27
   5  -1   7    1.52    0.40
   5  -1   7    1.22    0.38
   5  -1   7    0.26    0.14
   5  -1   7    0.51    0.16
   5   1   7    0.74    0.37
   5   1   7    0.43    0.41
   5   1   7    1.22    0.31
   5   1   7    0.74    0.41
   6  -1   7    0.68    0.40
   6  -1   7    0.88    0.38
   6  -1   7    0.54    0.42
   6  -1   7    0.51    0.38
   6   1   7    1.37    0.33
   6   1   7    0.82    0.51
   6   1   7    1.20    0.41
   6   1   7    0.67    0.42
   6   1   7    1.10    0.50
   7  -1   7    3.44    0.56
   7  -1   7    2.37    0.49
   7  -1   7    2.04    0.48
   7  -1   7    2.20    0.50
   7   1   7    2.67    0.38
   7   1   7    3.46    0.58
   7   1   7    2.62    0.58
   7   1   7    1.81    0.49
   7   1   7    2.40    0.63
   8  -1   7   64.27    3.64
   8  -1   7   66.34    3.48
   8  -1   7   68.69    3.35
   8  -1   7   63.70    3.72
   8   1   7   65.16    3.38
   8   1   7   65.62    3.83
   8   1   7   66.62    3.73
   8   1   7   67.02    3.52
   9  -1   7    0.06    0.33
  -9  -1  -7    0.11    0.22
   9  -1   7    0.29    0.37
   9  -1   7   -0.04    0.35
   9   1   7    0.00    0.40
   9   1   7    0.50    0.38
   9   1   7    0.15    0.40
  10  -1   7    3.17    0.39
  10  -1   7    3.90    0.42
  10  -1   7    3.63    0.46
  10   1   7    3.68    0.48
  10   1   7    4.28    0.45
  10   1   7    3.74    0.42
 -12  -2   7    1.69    0.29
  11  -2  -7    8.75    0.95
 -11  -2   7   10.32    0.76
 -11   2   7    8.46    0.77
 -11   2   7    7.28    0.72
 -10  -2   7   11.21    0.93
  10  -2  -7   12.75    1.28
  10  -2  -7   11.54    1.21
 -10  -2   7   10.55    0.86
 -10  -2   7   11.55    0.93
 -10   2   7   10.99    0.96
 -10   2   7   10.19    0.76
 -10   2   7    9.72    1.06
   9  -2  -7   39.28    2.73
  -9  -2   7   43.26    2.33
  -9  -2   7   42.90    2.46
  -9  -2   7   38.68    2.26
  -9  -2   7   39.57    2.40
  -9   2   7   40.63    2.32
  -9   2   7   35.90    2.40
  -9   2   7   40.61    2.63
  -9   2   7   42.39    2.49
  -9   2   7   35.27    2.41
  -8  -2   7    1.45    0.45
  -8  -2   7    1.49    0.53
  -8  -2   7    1.04    0.42
  -8  -2   7    0.62    0.06
  -8  -2   7    1.17    0.43
  -8   2   7    0.90    0.46
  -8   2   7    0.70    0.43
  -8   2   7    1.00    0.58
  -8   2   7    0.82    0.50
  -8   2   7    2.24    0.63
  -7  -2   7    1.92    0.45
  -7  -2   7    3.31    0.57
  -7  -2   7    1.86    0.43
  -7  -2   7    2.17    0.42
  -7  -2   7    2.37    0.25
  -7  -2   7    3.18    0.52
  -7   2   7    1.87    0.56
  -7   2   7    2.31    0.58
  -7   2   7    1.72    0.45
  -7   2   7    2.26    0.46
  -7   2   7    2.87    0.57
  -6  -2   7    5.37    0.55
  -6  -2   7    5.44    0.60
  -6  -2   7    6.26    0.41
  -6  -2   7    5.56    0.38
  -6  -2   7    6.43    0.67
  -6   2   7    4.54    0.63
  -6   2   7    5.14    0.64
  -6   2   7    4.61    0.69
  -5  -2   7   20.28    1.04
  -5  -2   7   23.69    1.06
  -5  -2   7   20.60    1.36
  -5  -2   7   23.93    1.30
  -5   2   7   19.33    1.36
  -5   2   7   19.23    1.47
  -4  -2   7    6.33    0.53
  -4  -2   7    6.52    0.53
  -4   2   7    5.71    0.61
  -4   2   7    4.30    0.53
  -3  -2   7    0.52    0.18
  -3  -2   7   -0.32    0.35
  -3   2   7    0.46    0.26
  -3   2   7    0.52    0.54
  -2  -2   7    1.52    0.50
  -2   2   7    1.68    0.34
  -2   2   7    1.98    0.70
  -1  -2   7  123.12    8.30
  -1   2   7  122.31    6.81
  -1   2   7  125.95    8.56
   0  -2   7    4.85    0.76
   0   2   7    5.59    0.98
   0   2   7    6.87    0.62
   1  -2   7   11.23    1.12
   1   2   7   10.16    1.39
   1   2   7   10.30    0.84
   2  -2   7  145.96    7.94
   2   2   7  145.51    8.06
   2   2   7  149.28   10.12
   3  -2   7    2.19    0.30
   3   2   7    1.58    0.41
   3   2   7    1.94    0.42
   4  -2   7    4.18    0.46
   4  -2   7    4.67    0.49
   4   2   7    4.13    0.59
   4   2   7    3.02    0.53
   5  -2   7    3.16    0.43
   5  -2   7    2.24    0.42
   5  -2   7    2.15    0.39
   5   2   7    2.62    0.48
   5   2   7    2.41    0.55
   5   2   7    3.00    0.57
   6  -2   7   24.43    1.58
   6  -2   7   24.99    1.52
   6  -2   7   22.63    1.45
   6  -2   7   26.25    1.61
   6   2   7   23.93    1.57
   6   2   7   26.84    1.81
   6   2   7   27.32    1.81
   6   2   7   26.16    1.46
   6   2   7   25.46    1.55
   7  -2   7   11.17    0.89
   7  -2   7   11.37    0.89
   7  -2   7   11.93    0.94
   7  -2   7    9.82    0.93
   7   2   7   12.22    1.13
   7   2   7   10.66    0.92
   7   2   7    8.38    0.87
   7   2   7   12.63    0.82
   7   2   7   10.89    1.08
   8  -2   7   20.18    1.21
   8  -2   7   18.67    1.27
   8  -2   7   20.23    1.27
  -8  -2  -7   19.69    1.20
   8   2   7   18.41    1.42
   8   2   7   17.30    1.45
   8   2   7   19.04    1.06
   8   2   7   19.29    1.31
   8   2   7   19.57    1.34
   9  -2   7   17.66    1.07
   9  -2   7   17.63    1.02
   9   2   7   16.25    1.12
   9   2   7   13.48    1.06
   9   2   7   14.32    1.19
  10  -2   7    4.55    0.41
  10  -2   7    3.62    0.37
  10   2   7    3.24    0.47
  10   2   7    3.38    0.43
  10   2   7    3.70    0.44
 -11  -3   7   19.17    1.14
  11  -3  -7   17.56    1.17
 -11   3   7   18.35    1.19
  10  -3  -7    4.74    0.81
  10  -3  -7    4.53    0.66
 -10  -3   7    4.65    0.56
  10  -3  -7    4.20    0.79
 -10   3   7    4.02    0.59
 -10   3   7    6.06    0.84
 -10   3   7    4.48    0.65
  -9  -3   7   33.47    1.98
   9  -3  -7   29.34    1.68
   9  -3  -7   34.14    2.30
   9  -3  -7   30.60    1.90
  -9  -3   7   31.39    1.97
  -9  -3   7   34.25    1.88
   9  -3  -7   31.31    2.24
  -9  -3   7   32.87    1.85
  -9   3   7   30.28    2.02
  -9   3   7   32.56    2.26
  -9   3   7   33.61    1.97
  -9   3   7   31.46    2.06
  -9   3   7   31.46    2.06
  -8  -3   7   76.28    3.98
  -8  -3   7   77.42    4.20
   8  -3  -7   74.45    4.49
  -8  -3   7   72.32    4.07
  -8  -3   7   74.32    3.86
   8  -3  -7   72.39    4.32
  -8   3   7   76.53    4.16
  -8   3   7   73.26    3.96
  -8   3   7   70.02    4.15
  -8   3   7   76.79    4.47
  -8   3   7   67.89    4.17
  -7  -3   7   13.61    1.09
   7  -3  -7   15.14    1.38
  -7  -3   7   14.31    1.07
  -7  -3   7   13.71    1.10
   7  -3  -7   14.78    1.42
  -7  -3   7   15.69    1.00
  -7  -3   7   14.53    1.01
  -7   3   7   14.16    1.20
  -7   3   7   13.48    1.10
  -7   3   7   16.66    1.35
  -7   3   7   14.25    1.22
  -6  -3   7    9.45    0.72
  -6  -3   7    8.80    0.74
   6  -3  -7   10.21    1.08
  -6  -3   7    8.75    0.81
  -6   3   7    9.64    1.01
  -6   3   7    7.46    0.80
  -6   3   7    8.23    0.84
  -5  -3   7   31.30    1.64
  -5  -3   7   27.30    1.71
  -5   3   7   28.08    1.78
  -5   3   7   28.84    1.93
  -4  -3   7    1.71    0.26
  -4  -3   7    2.38    0.27
  -4   3   7    2.20    0.45
  -4   3   7    2.57    0.43
  -3   3   7  117.12    6.52
  -2  -3   7    2.28    0.54
  -2   3   7    2.69    0.44
  -2   3   7    1.86    0.74
  -1  -3   7   21.80    1.59
  -1   3   7   14.57    1.79
  -1   3   7   17.71    1.26
   0  -3   7  159.85   10.26
   0   3   7  154.23    8.53
   0   3   7  151.23   10.62
   1  -3   7    8.54    0.92
   1   3   7    9.45    0.79
   1   3   7    7.78    1.28
   2   3   7   21.66    1.44
   3   3   7   54.59    3.11
   3   3   7   54.33    3.22
   4  -3   7   66.59    3.60
   4   3   7   63.44    3.93
   4   3   7   73.55    3.83
   5  -3   7    1.01    0.32
   5  -3   7    0.04    0.28
   5  -3   7    0.65    0.30
   5   3   7    0.40    0.37
   5   3   7    0.56    0.47
   5   3   7    0.22    0.44
   5   3   7    0.04    0.37
   6  -3   7    1.77    0.40
   6  -3   7    1.53    0.39
   6  -3   7    1.76    0.39
   6   3   7    1.32    0.47
   6   3   7    1.06    0.53
   6   3   7    2.11    0.52
   6   3   7    1.23    0.55
   7  -3   7   38.00    2.24
   7  -3   7   40.99    2.11
   7  -3   7   40.02    2.19
   7   3   7   40.64    2.53
   7   3   7   38.25    2.29
   7   3   7   39.53    2.23
   7   3   7   39.46    2.55
   7   3   7   39.31    2.12
   8  -3   7    0.84    0.39
   8  -3   7    0.38    0.35
  -8  -3  -7    0.27    0.23
   8   3   7    0.77    0.48
   8   3   7    0.73    0.33
   8   3   7    0.68    0.53
   8   3   7    0.69    0.45
   8   3   7    1.23    0.52
   9  -3   7    4.01    0.44
   9  -3   7    3.50    0.45
   9   3   7    2.95    0.51
   9   3   7    3.50    0.62
   9   3   7    2.89    0.51
  10  -3   7   29.76    1.55
  10  -3   7   31.35    1.62
  10   3   7   30.23    1.78
  10   3   7   30.62    1.69
 -10   3  -7   31.41    1.67
  10   3   7   30.42    1.62
  11  -4  -7    0.69    0.39
 -11  -4   7    0.72    0.31
 -11   4   7    0.43    0.35
  10  -4  -7    1.39    0.63
  10  -4  -7    1.41    0.54
  10  -4  -7    1.97    0.62
 -10  -4   7    1.73    0.41
 -10   4   7    1.02    0.47
 -10   4   7    0.90    0.48
 -10   4   7    2.15    0.50
 -10   4   7    1.54    0.59
  -9  -4   7   20.27    1.30
   9  -4  -7   22.58    1.45
   9  -4  -7   18.85    1.67
   9  -4  -7   20.81    1.71
  -9   4   7   20.35    1.40
  -9   4   7   20.79    1.70
  -9   4   7   19.94    1.48
  -9   4   7   21.19    1.47
  -9   4   7   18.37    1.46
  -8  -4   7    5.06    0.47
   8  -4  -7    4.26    0.87
  -8  -4   7    4.95    0.55
   8  -4  -7    3.72    0.77
  -8   4   7    4.52    0.71
  -8   4   7    2.86    0.73
  -8   4   7    5.12    0.77
  -8   4   7    4.97    0.67
  -7  -4   7   10.37    0.75
  -7  -4   7   10.22    0.78
   7  -4  -7   10.32    1.16
   7  -4  -7   11.42    1.22
  -7   4   7   10.28    0.93
  -7   4   7   12.40    1.25
  -7   4   7    7.54    0.89
  -7   4   7   11.53    1.03
   6  -4  -7   15.64    1.36
  -6  -4   7   15.94    0.95
   6  -4  -7   17.53    1.40
  -6   4   7   15.98    1.34
  -6   4   7   13.11    1.19
  -6   4   7   15.34    1.21
   5  -4  -7   11.93    1.09
   5  -4  -7   11.12    1.08
  -5   4   7   10.53    1.05
  -5   4   7   10.99    0.93
  -4   4   7   16.89    1.21
  -4   4   7   17.33    1.30
  -3   4   7   19.33    1.37
  -2   4   7   46.57    2.79
  -1  -4   7    3.65    0.55
  -1   4   7    2.76    0.45
   0  -4   7   17.63    1.34
   0   4   7   15.26    1.17
   1   4   7   63.79    3.68
   2  -4   7   29.63    1.56
   2   4   7   27.77    1.85
   3   4   7    0.34    0.41
   3   4   7    1.12    0.40
   4  -4   7   32.04    2.44
   4   4   7   37.12    2.21
   4   4   7   34.72    2.23
   5  -4   7   32.30    1.81
   5   4   7   34.99    2.00
   5   4   7   34.79    2.24
   5   4   7   32.56    1.92
   5   4   7   31.63    2.18
   6  -4   7   30.75    1.66
   6  -4   7   30.91    1.73
   6   4   7   31.64    2.12
   6   4   7   30.28    2.08
   6   4   7   31.30    1.83
   6   4   7   29.13    1.87
   7  -4   7    3.61    0.46
  -7  -4  -7    3.98    0.39
   7  -4   7    3.88    0.49
   7   4   7    2.19    0.60
   7   4   7    3.42    0.78
   7   4   7    3.47    0.71
   7   4   7    2.57    0.58
   8  -4   7    1.11    0.36
   8  -4   7    1.06    0.33
   8   4   7    1.21    0.52
   8   4   7    0.59    0.46
   8   4   7    0.58    0.55
   8   4   7    1.34    0.52
   8   4   7    0.72    0.37
   9  -4   7    0.44    0.29
   9  -4   7    0.81    0.29
   9   4   7    0.57    0.43
   9   4   7    0.89    0.19
   9   4   7    0.52    0.49
   9   4   7    1.20    0.49
   9   4   7    0.42    0.41
   9   4   7    0.81    0.19
  10   4   7    2.00    0.35
  10   4   7    1.89    0.36
 -10   4  -7    2.12    0.25
 -11  -5   7    2.97    0.36
  11  -5  -7    2.89    0.50
  11  -5  -7    2.34    0.47
  10  -5  -7    0.44    0.50
  10  -5  -7    0.22    0.47
  10  -5  -7    0.14    0.49
  10  -5  -7    1.20    0.58
 -10  -5   7    0.63    0.34
 -10   5   7    0.43    0.53
 -10   5   7    0.20    0.43
 -10   5   7    0.45    0.46
  -9  -5   7   14.07    0.97
   9  -5  -7   14.06    1.33
   9  -5  -7   14.97    1.20
   9  -5  -7   15.16    1.42
   9  -5  -7   14.87    1.19
  -9   5   7   13.09    1.13
  -9   5   7   11.97    1.31
  -9   5   7   13.21    1.18
  -9   5   7   14.58    1.16
  -8  -5   7   20.99    1.27
   8  -5  -7   20.95    1.70
   8  -5  -7   21.20    1.73
  -8   5   7   20.37    1.55
  -8   5   7   21.01    1.74
  -8   5   7   20.09    1.48
  -7  -5   7   43.44    2.28
   7  -5  -7   43.18    2.81
   7  -5  -7   41.11    2.28
   7  -5  -7   38.93    2.69
  -7   5   7   43.79    2.56
  -7   5   7   45.66    2.87
   6  -5  -7   38.50    2.61
   6  -5  -7   36.83    2.50
  -6   5   7   40.06    2.38
  -6   5   7   43.50    2.66
   5  -5  -7    8.94    1.01
   5  -5  -7   11.13    1.07
  -5   5   7   11.27    0.95
  -5   5   7   10.97    1.09
   4  -5  -7   47.30    2.75
  -4   5   7   45.29    2.71
  -4   5   7   43.98    2.81
  -3   5   7   16.35    1.26
  -2  -5   7   59.94    2.94
  -2   5   7   54.04    3.39
  -1  -5   7    8.16    0.48
  -1  -5   7    8.85    0.46
  -1   5   7    8.17    0.83
   0  -5   7   70.67    3.23
   0  -5   7   68.86    3.43
   0   5   7   63.94    3.94
   1  -5   7   14.63    0.76
   1  -5   7   15.00    0.80
   1   5   7   12.78    1.09
   2  -5   7    7.77    0.95
   2  -5   7    9.48    0.58
   2   5   7   10.36    0.96
   2   5   7    8.31    0.87
   3  -5   7   30.83    2.25
   3  -5   7   31.33    1.69
  -3  -5  -7   29.14    2.01
   3   5   7   32.71    2.04
   3   5   7   31.47    2.06
  -4  -5  -7    1.17    0.54
   4  -5   7    1.55    0.60
   4   5   7    1.31    0.51
   4   5   7    1.64    0.52
  -5  -5  -7   38.23    2.53
   5  -5   7   37.82    2.08
   5   5   7   40.60    2.23
   5   5   7   41.18    2.59
   5   5   7   40.67    2.54
   5   5   7   39.11    2.29
   6  -5   7    0.00    0.27
  -6  -5  -7    0.34    0.24
   6   5   7    0.16    0.54
   6   5   7   -0.14    0.42
   6   5   7    0.11    0.57
   6   5   7    0.21    0.46
   7  -5   7    3.08    0.43
   7   5   7    3.18    0.64
   7   5   7    3.10    0.75
   7   5   7    2.51    0.58
   7   5   7    3.52    0.72
   8  -5   7    2.67    0.38
   8   5   7    2.77    0.59
   8   5   7    2.41    0.58
   8   5   7    2.28    0.64
   8   5   7    3.43    0.57
   9  -5   7    5.86    0.48
   9   5   7    4.81    0.68
   9   5   7    5.12    0.66
   9   5   7    5.40    0.44
   9   5   7    5.71    0.63
   9   5   7    5.66    0.60
 -11  -6   7    9.30    0.57
  11  -6  -7    8.53    0.75
  11  -6  -7    6.65    0.64
  10  -6  -7    3.72    0.62
 -10  -6   7    2.89    0.39
  10  -6  -7    3.13    0.42
  10  -6  -7    3.38    0.58
  10  -6  -7    2.92    0.70
 -10   6   7    2.87    0.64
 -10   6   7    1.99    0.54
 -10   6   7    2.34    0.51
   9  -6  -7    2.53    0.67
  -9  -6   7    2.21    0.39
   9  -6  -7    2.44    0.62
   9  -6  -7    2.98    0.68
   9  -6  -7    3.58    0.81
  -9   6   7    2.97    0.59
  -9   6   7    2.73    0.75
   8  -6  -7   20.34    1.60
   8  -6  -7   18.77    1.63
   8  -6  -7   20.64    1.46
   8  -6  -7   18.78    1.41
  -8  -6   7   20.22    1.19
  -8   6   7   15.85    1.60
  -8   6   7   20.03    1.40
  -7  -6   7   28.58    1.63
   7  -6  -7   31.24    2.10
   7  -6  -7   28.94    1.86
   7  -6  -7   29.10    2.09
  -7   6   7   28.20    1.88
  -7   6   7   32.07    2.22
  -6  -6   7    1.37    0.29
   6  -6  -7    0.88    0.54
   6  -6  -7    2.29    0.51
   6  -6  -7    1.86    0.56
   6  -6  -7    1.70    0.20
  -6  -6   7    2.51    0.49
   6  -6  -7    2.40    0.62
  -6   6   7    3.33    0.58
  -6   6   7    2.23    0.68
   5  -6  -7    0.45    0.50
   5  -6  -7   -0.14    0.44
  -5   6   7    0.39    0.45
  -5   6   7    0.24    0.39
  -5   6   7   -0.60    0.40
   4  -6  -7    3.05    0.60
  -4   6   7    3.08    0.57
  -4   6   7    1.69    0.52
   3  -6  -7   27.64    1.86
  -3   6   7   28.05    1.93
  -3   6   7   28.69    1.83
  -2  -6   7   21.14    1.00
  -2  -6   7   17.90    1.04
  -2  -6   7   19.73    0.99
  -2  -6   7   20.51    1.05
  -2   6   7   18.10    1.43
  -1   6   7   10.11    0.95
   0   6   7    1.01    0.39
   1  -6   7   18.20    1.51
   1  -6   7   17.31    0.94
   1  -6   7   18.75    0.89
   1   6   7   15.08    1.28
   2  -6   7    2.31    0.60
  -2  -6  -7    3.56    0.59
   2  -6   7    3.01    0.28
   2   6   7    2.46    0.56
   2   6   7    1.79    0.47
  -3  -6  -7    0.58    0.45
   3  -6   7   -0.10    0.16
   3  -6   7   -0.30    0.51
   3   6   7    0.11    0.41
   3   6   7    0.67    0.42
   3   6   7    0.07    0.37
   4  -6   7   14.27    1.42
  -4  -6  -7   14.37    1.32
   4   6   7   14.02    1.29
   4   6   7   14.52    1.10
   4   6   7   16.51    1.35
   4   6   7   14.44    1.16
  -5  -6  -7    1.80    0.27
  -5  -6  -7    2.72    0.71
   5   6   7    1.74    0.62
   5   6   7    2.58    0.59
   5   6   7    0.93    0.45
   5   6   7    1.74    0.51
   5   6   7    1.77    0.61
   6   6   7   17.75    1.33
   6   6   7   18.67    1.58
   6   6   7   18.22    1.34
   6   6   7   18.50    1.43
   6   6   7   20.40    1.62
   7  -6   7    3.90    0.41
   7   6   7    2.51    0.55
   7   6   7    5.17    0.83
   7   6   7    1.73    0.63
   7   6   7    3.78    0.78
   7   6   7    3.25    0.62
  -8  -6  -7    4.34    0.68
   8   6   7    5.33    0.65
   8   6   7    4.84    0.62
   8   6   7    3.33    0.64
   8   6   7    4.95    0.71
   8   6   7    4.66    0.76
   9   6   7    3.78    0.52
   9   6   7    3.61    0.59
   9   6   7    3.98    0.57
   9   6   7    4.20    0.53
  11  -7  -7    0.95    0.33
  11  -7  -7    0.73    0.32
  10  -7  -7    2.90    0.52
  10  -7  -7    2.61    0.29
  10  -7  -7    2.64    0.54
  10  -7  -7    2.47    0.57
 -10  -7   7    2.91    0.34
 -10   7   7    2.77    0.50
 -10   7   7    2.23    0.56
   9  -7  -7    1.51    0.59
  -9  -7   7    1.49    0.32
   9  -7  -7    2.66    0.62
   9  -7  -7    1.16    0.36
   9  -7  -7    1.86    0.58
   9  -7  -7    1.54    0.65
  -9   7   7    2.43    0.52
  -9   7   7    1.49    0.63
  -9   7   7    1.85    0.68
   8  -7  -7    2.71    0.71
   8  -7  -7    3.13    0.78
   8  -7  -7    2.21    0.58
  -8  -7   7    2.53    0.37
  -8   7   7    2.81    0.56
  -8   7   7    1.74    0.68
  -8   7   7    4.47    0.82
   7  -7  -7   10.13    1.17
   7  -7  -7   11.64    1.05
  -7  -7   7   11.69    0.79
   7  -7  -7   13.46    1.30
   7  -7  -7   12.58    1.15
  -7   7   7   13.15    1.29
  -7   7   7   14.24    1.45
  -7   7   7   11.53    1.02
   6  -7  -7    0.62    0.45
   6  -7  -7   -0.19    0.51
   6  -7  -7    0.09    0.49
   6  -7  -7    0.21    0.58
  -6   7   7    0.86    0.61
  -6   7   7    0.70    0.46
  -6   7   7    1.12    0.59
   5  -7  -7    0.15    0.49
   5  -7  -7   -0.33    0.47
   5  -7  -7   -0.03    0.46
  -5   7   7    0.50    0.40
  -5   7   7    0.16    0.46
  -5   7   7   -0.18    0.44
   4  -7  -7   74.85    4.48
   4  -7  -7   84.45    4.78
  -4   7   7   82.49    4.51
  -4   7   7   76.85    4.72
   3  -7  -7   13.09    1.19
  -3  -7   7   14.17    0.76
  -3   7   7   12.57    1.17
  -3   7   7   12.66    1.22
  -2  -7   7   21.18    1.14
  -2  -7   7   23.66    1.08
   2  -7  -7   18.33    1.48
  -2  -7   7   23.66    1.08
  -2  -7   7   23.14    1.66
  -2  -7   7   19.64    1.13
  -2   7   7   21.43    1.60
   1  -7  -7    1.87    0.45
  -1  -7   7    1.50    0.53
  -1   7   7    1.11    0.43
   0  -7  -7   12.81    1.07
   0  -7   7   13.13    1.21
   0   7   7   11.04    1.07
   1  -7   7    1.16    0.14
  -1  -7  -7    1.22    0.46
   1  -7   7    1.12    0.13
   1  -7   7    1.50    0.53
   1   7   7    1.48    0.46
   1   7   7    0.88    0.48
  -2  -7  -7    0.04    0.37
   2  -7   7    0.06    0.13
   2  -7   7    0.61    0.51
   2   7   7    0.56    0.41
   2   7   7   -0.15    0.41
  -3  -7  -7   21.46    1.52
   3  -7   7   18.42    1.68
   3  -7   7   21.85    1.16
   3   7   7   17.87    1.54
   3   7   7   18.69    1.53
   3   7   7   19.72    1.37
  -4  -7  -7    1.05    0.17
   4  -7   7    2.03    0.68
  -4  -7  -7    1.58    0.57
  -4  -7  -7    0.67    0.42
   4  -7   7    1.09    0.26
   4   7   7    1.19    0.57
   4   7   7    1.58    0.50
   4   7   7    2.80    0.66
   4   7   7    1.29    0.45
  -5  -7  -7    0.55    0.42
  -5  -7  -7    0.52    0.57
   5   7   7    1.22    0.52
   5   7   7    0.54    0.55
   5   7   7    0.92    0.61
   5   7   7    0.38    0.46
  -6  -7  -7    0.34    0.45
   6   7   7    0.35    0.60
   6   7   7   -0.39    0.46
   6   7   7    0.29    0.50
   6   7   7    1.17    0.60
  -7  -7  -7    0.41    0.45
   7   7   7    0.72    0.53
   7   7   7    0.24    0.58
   7   7   7    1.90    0.55
   7   7   7    0.86    0.57
  -8  -7  -7   13.61    0.98
  -8  -7  -7   11.59    1.01
   8   7   7   12.74    1.18
   8   7   7   12.93    0.98
   8   7   7   12.71    1.06
  -9  -7  -7    0.21    0.30
   9   7   7   -0.14    0.31
   9   7   7    0.50    0.36
  10  -8  -7    5.10    0.58
  10  -8  -7    4.89    0.63
  10  -8  -7    3.94    0.52
 -10   8   7    4.64    0.56
   9  -8  -7   15.23    1.29
   9  -8  -7   13.71    0.84
   9  -8  -7   13.83    1.18
   9  -8  -7   14.82    1.13
   9  -8  -7   15.39    1.11
  -9   8   7   16.07    1.36
   8  -8  -7   19.94    1.60
   8  -8  -7   21.37    1.69
   8  -8  -7   21.23    1.43
   8  -8  -7   22.16    1.59
   8  -8  -7   20.17    1.23
  -8   8   7   22.64    1.77
   7  -8  -7    0.19    0.61
   7  -8  -7    0.06    0.43
   7  -8  -7    0.38    0.57
   7  -8  -7   -0.02    0.56
   6  -8  -7   11.04    1.10
   6  -8  -7    8.06    0.92
   6  -8  -7    9.22    0.88
   6  -8  -7    8.23    1.04
   5  -8  -7   79.70    4.53
   5  -8  -7   75.77    4.39
  -5  -8   7   77.25    4.32
   5  -8  -7   71.33    4.05
   5  -8  -7   80.18    4.43
   4  -8  -7   -0.09    0.42
  -4  -8   7    0.68    0.24
   4  -8  -7    1.05    0.56
   4  -8  -7    0.93    0.52
  -3  -8   7   47.74    2.26
   3  -8  -7   43.54    2.77
   2  -8  -7    1.81    0.60
  -2  -8   7    3.06    0.25
   2  -8  -7    2.60    0.54
  -2  -8   7    2.52    0.21
  -2  -8   7    3.33    0.61
  -2  -8   7    2.97    0.23
   1  -8  -7   51.21    2.98
  -1  -8   7   51.56    3.36
   0  -8  -7    7.27    0.83
   0  -8   7    7.80    0.97
   0   8   7    7.89    0.95
   1  -8   7    0.29    0.54
   1  -8   7    0.73    0.11
  -1  -8  -7    0.13    0.39
   1   8   7    0.75    0.44
   2  -8   7   37.82    2.79
  -2  -8  -7   41.87    2.50
   2  -8   7   42.26    2.10
   2  -8   7   41.00    2.24
   2   8   7   38.78    2.60
   2   8   7   38.34    2.57
   3  -8   7   21.06    1.84
  -3  -8  -7   21.38    1.44
   3  -8   7   19.52    1.59
  -3  -8  -7   21.45    1.65
   3  -8   7   24.77    1.27
   3  -8   7   24.79    1.51
   3   8   7   26.03    1.79
   3   8   7   20.29    1.67
  -4  -8  -7    8.96    0.85
   4  -8   7    9.79    1.13
  -4  -8  -7    6.99    0.90
   4  -8   7    9.63    0.65
   4   8   7    8.31    1.00
   4   8   7   10.04    1.16
   4   8   7    8.04    0.79
  -5  -8  -7   18.42    1.54
  -5  -8  -7   17.54    1.29
   5   8   7   16.77    1.33
   5   8   7   17.68    1.27
   5   8   7   20.50    1.64
   5   8   7   21.77    1.66
  -6  -8  -7    2.45    0.55
   6   8   7    2.51    0.70
   6   8   7    2.96    0.59
   6   8   7    2.70    0.76
   6   8   7    1.63    0.55
  -7  -8  -7    0.21    0.41
  -7  -8  -7   -0.06    0.41
   7   8   7    0.43    0.57
   7   8   7    0.45    0.49
   7   8   7    0.33    0.52
   7   8   7   -0.08    0.45
  -8  -8  -7    2.15    0.32
  -8  -8  -7    2.55    0.47
  -8  -8  -7    2.15    0.47
   8   8   7    2.20    0.58
   8   8   7    3.26    0.51
  -9  -8  -7    1.29    0.32
  10  -9  -7    2.90    0.44
  10  -9  -7    2.10    0.40
 -10   9   7    1.61    0.40
   9  -9  -7    0.23    0.44
   9  -9  -7    0.10    0.50
   9  -9  -7   -0.20    0.43
   9  -9  -7    0.13    0.43
   8  -9  -7   11.70    0.96
   8  -9  -7    9.58    1.01
   8  -9  -7   10.40    0.66
   8  -9  -7   10.78    1.02
   8  -9  -7    9.86    0.91
   8  -9  -7    7.95    1.00
   7  -9  -7   15.43    1.19
   7  -9  -7   14.86    0.99
   7  -9  -7   15.61    1.35
   7  -9  -7   17.91    1.37
   7  -9  -7   16.08    1.45
   6  -9  -7   41.35    2.59
   6  -9  -7   37.88    2.30
   6  -9  -7   35.91    2.50
   6  -9  -7   43.25    2.60
   6  -9  -7   41.20    2.11
   5  -9  -7   -0.03    0.54
  -5  -9   7    0.13    0.39
   5  -9  -7   -0.15    0.50
  -5  -9   7    0.79    0.38
   5  -9  -7    0.82    0.55
   5  -9  -7    0.28    0.41
   4  -9  -7   61.00    3.43
  -4  -9   7   54.30    3.23
   4  -9  -7   51.78    3.29
  -4  -9   7   57.07    3.00
  -4  -9   7   57.82    2.78
   4  -9  -7   55.11    3.05
   4  -9  -7   57.46    3.33
   3  -9  -7    5.03    0.66
   3  -9  -7    5.83    0.77
  -3  -9   7    4.91    0.61
  -3  -9   7    6.59    0.62
   3  -9  -7    6.56    0.68
  -3  -9   7    5.97    0.44
  -2  -9   7   13.01    0.64
   2  -9  -7   12.12    1.09
  -2  -9   7   10.94    0.65
  -2  -9   7   12.06    1.24
  -2  -9   7   12.64    0.63
  -1  -9   7   71.47    4.30
   1  -9  -7   63.78    3.79
   0  -9   7   16.82    1.46
   0  -9  -7   14.80    1.25
   1  -9   7    2.19    0.18
   1  -9   7    2.97    0.73
  -1  -9  -7    2.18    0.55
   1  -9   7    2.91    0.49
   1  -9   7    2.38    0.46
   1  -9   7    2.51    0.53
   2  -9   7   17.36    0.91
  -2  -9  -7   16.72    1.35
   2  -9   7   16.75    1.52
  -2  -9  -7   14.20    1.15
   2  -9   7   16.32    1.12
   2  -9   7   16.10    1.18
   2  -9   7   14.55    1.29
   2  -9   7   16.69    0.86
  -3  -9  -7   22.87    1.59
   3  -9   7   27.34    1.42
   3  -9   7   23.95    1.79
   3  -9   7   25.24    2.01
   3  -9   7   27.75    1.68
  -3  -9  -7   27.07    1.84
  -4  -9  -7   75.05    3.97
   4  -9   7   73.24    4.72
   4  -9   7   78.04    3.86
  -4  -9  -7   73.44    4.23
   4   9   7   70.56    4.45
  -5  -9  -7    9.13    1.03
  -5  -9  -7   10.44    0.94
   5  -9   7   10.28    1.19
   5   9   7   11.01    1.19
  -6  -9  -7   14.73    1.12
   6   9   7   16.36    1.41
   6   9   7   14.95    1.41
  -7  -9  -7   28.90    1.62
  -7  -9  -7   24.19    1.37
  -7  -9  -7   23.61    1.62
   7   9   7   29.76    1.90
   7   9   7   25.62    1.85
  -8  -9  -7    7.96    0.71
  10 -10  -7    0.00    0.28
  10 -10  -7    0.47    0.28
 -10  10   7    0.31    0.30
   9 -10  -7    3.72    0.52
   9 -10  -7    3.57    0.51
   9 -10  -7    3.69    0.53
   9 -10  -7    2.32    0.55
   8 -10  -7    1.50    0.43
   8 -10  -7    2.69    0.55
   8 -10  -7    1.92    0.48
   8 -10  -7    1.38    0.51
   8 -10  -7    1.68    0.60
   7 -10  -7    4.00    0.71
   7 -10  -7    4.89    0.72
   7 -10  -7    5.30    0.67
   7 -10  -7    4.20    0.67
   7 -10  -7    4.39    0.36
   7 -10  -7    4.50    0.75
  -7 -10   7    2.66    0.50
   7 -10  -7    3.96    0.36
   6 -10  -7    1.03    0.47
   6 -10  -7    1.51    0.57
  -6 -10   7    2.20    0.49
   6 -10  -7    1.49    0.63
   6 -10  -7    1.19    0.60
   6 -10  -7    1.43    0.33
   5 -10  -7   35.21    2.08
  -5 -10   7   37.01    2.03
   5 -10  -7   37.19    2.33
   5 -10  -7   34.90    2.28
   5 -10  -7   32.84    1.84
   5 -10  -7   36.36    2.32
  -4 -10   7    0.34    0.24
   4 -10  -7    0.12    0.38
  -4 -10   7    0.28    0.38
   4 -10  -7    0.35    0.29
   4 -10  -7   -0.17    0.50
   4 -10  -7   -0.14    0.49
  -4 -10   7    0.18    0.38
   4 -10  -7    0.10    0.54
  -3 -10   7    2.63    0.57
  -3 -10   7    2.41    0.29
   3 -10  -7    2.51    0.62
   3 -10  -7    2.21    0.47
   3 -10  -7    1.76    0.36
   3 -10  -7    2.80    0.56
  -3 -10   7    2.75    0.48
  -3 -10   7    2.27    0.48
   2 -10  -7   69.16    4.01
  -2 -10   7   82.46    3.63
  -2 -10   7   77.36    4.68
  -2 -10   7   74.19    3.97
  -2 -10   7   74.49    4.30
   2 -10  -7   76.75    4.30
   2 -10  -7   73.32    4.34
  -2 -10   7   72.99    3.85
  -2 -10   7   81.23    4.84
  -2 -10   7   82.84    3.64
  -1 -10   7    0.94    0.39
   1 -10  -7    0.71    0.38
  -1 -10   7    0.15    0.35
  -1 -10   7    0.61    0.47
  -1 -10   7    1.02    0.59
   1 -10  -7    0.19    0.41
   1 -10  -7    0.71    0.43
   0 -10   7    5.46    0.61
   0 -10   7    4.26    0.62
   0 -10   7    6.55    0.95
   0 -10  -7    3.47    0.55
   0 -10  -7    5.08    0.72
   0 -10  -7    7.62    0.71
   0 -10   7    4.37    0.69
  -1 -10  -7   28.47    1.92
   1 -10   7   32.88    1.84
  -1 -10  -7   32.63    2.04
   1 -10   7   35.55    2.39
   1 -10   7   30.05    1.58
  -1 -10  -7   29.08    1.82
   1 -10   7   31.16    2.13
   1 -10   7   32.02    1.93
   2 -10   7    4.27    0.34
  -2 -10  -7    4.39    0.61
   2 -10   7    4.81    0.61
   2 -10   7    4.40    0.68
   2 -10   7    5.56    0.95
  -2 -10  -7    3.96    0.67
   2 -10   7    4.10    0.35
   2 -10   7    5.68    0.67
   3 -10   7   70.51    4.47
  -3 -10  -7   66.43    3.70
   3 -10   7   73.08    3.95
  -3 -10  -7   69.83    3.94
   3 -10   7   65.35    4.24
   3 -10   7   70.50    3.56
  -4 -10  -7   14.26    0.91
   4 -10   7   14.62    1.45
   4 -10   7   14.23    0.87
  -4 -10  -7   12.09    1.08
  -4 -10  -7   14.79    1.28
   5 -10   7    0.56    0.65
  -5 -10  -7    0.80    0.46
  -5 -10  -7    1.03    0.31
  -6 -10  -7    4.21    0.62
  -6 -10  -7    3.94    0.41
  -7 -10  -7   10.15    0.82
  -7 -10  -7   10.89    0.87
  -8 -10  -7    8.91    0.70
   9 -11  -7   -0.12    0.31
   9 -11  -7    0.28    0.33
   9 -11  -7    0.26    0.40
   8 -11  -7    0.24    0.37
   8 -11  -7    0.90    0.41
   8 -11  -7    0.10    0.52
   8 -11  -7    0.22    0.41
   7 -11  -7    2.47    0.57
  -7 -11   7    2.93    0.49
   7 -11  -7    2.68    0.51
   7 -11  -7    2.29    0.58
   7 -11  -7    2.97    0.68
   7 -11  -7    1.68    0.45
   6 -11  -7    3.82    0.75
   6 -11  -7    6.27    0.74
  -6 -11   7    4.11    0.57
   6 -11  -7    5.17    0.75
   6 -11  -7    5.66    0.68
   5 -11  -7    0.34    0.42
   5 -11  -7    1.20    0.25
   5 -11  -7    0.85    0.58
   5 -11  -7    1.06    0.53
   5 -11  -7    0.96    0.55
  -5 -11   7    1.22    0.44
   5 -11  -7    0.86    0.25
   4 -11  -7    2.56    0.52
  -4 -11   7    4.15    0.57
   4 -11  -7    3.48    0.39
  -4 -11   7    3.49    0.53
  -4 -11   7    3.00    0.39
   4 -11  -7    3.53    0.66
   4 -11  -7    3.58    0.66
   4 -11  -7    3.98    0.70
   3 -11  -7    7.32    0.84
  -3 -11   7    6.74    0.47
  -3 -11   7    6.96    0.69
  -3 -11   7    6.79    0.72
   3 -11  -7    6.55    0.54
   3 -11  -7    4.53    0.64
   3 -11  -7    6.09    0.77
   3 -11  -7    7.01    0.84
  -3 -11   7    7.16    0.82
   2 -11  -7    1.70    0.33
  -2 -11   7    1.27    0.61
   2 -11  -7    0.82    0.40
   2 -11  -7    2.16    0.55
  -2 -11   7    1.61    0.17
  -2 -11   7    1.76    0.21
  -2 -11   7    1.79    0.55
  -2 -11   7    1.87    0.48
  -2 -11   7    1.52    0.44
   2 -11  -7    1.24    0.50
  -1 -11   7    1.04    0.43
   1 -11  -7    1.03    0.31
   1 -11  -7    0.88    0.39
   1 -11  -7    1.34    0.49
  -1 -11   7    0.57    0.41
  -1 -11   7    1.06    0.50
  -1 -11   7    1.25    0.66
   1 -11  -7    1.01    0.50
   0 -11   7    1.68    0.54
   0 -11  -7    1.99    0.50
   0 -11   7    1.34    0.69
   0 -11  -7    1.96    0.58
   0 -11   7    2.09    0.48
   0 -11  -7    1.76    0.44
   0 -11  -7    2.02    0.34
   0 -11   7    1.79    0.48
   1 -11   7    1.91    0.51
   1 -11   7    2.85    0.81
   1 -11   7    1.91    0.18
  -1 -11  -7    2.00    0.48
  -1 -11  -7    2.43    0.58
  -1 -11  -7    2.32    0.37
   1 -11   7    2.33    0.58
   1 -11   7    3.03    0.54
   2 -11   7    0.79    0.19
   2 -11   7    0.75    0.45
  -2 -11  -7    1.36    0.53
   2 -11   7    0.85    0.70
  -2 -11  -7    0.34    0.27
  -2 -11  -7    0.86    0.42
   2 -11   7    0.77    0.17
   2 -11   7    0.37    0.45
   2 -11   7    0.41    0.48
  -3 -11  -7    0.22    0.26
   3 -11   7    0.29    0.67
   3 -11   7    0.38    0.18
   3 -11   7   -0.39    0.45
  -3 -11  -7    0.45    0.41
  -3 -11  -7    0.34    0.52
   3 -11   7   -0.42    0.38
   4 -11   7    0.58    0.46
  -4 -11  -7    1.45    0.55
   4 -11   7    0.84    0.23
  -4 -11  -7    1.12    0.28
  -4 -11  -7    1.29    0.47
   4 -11   7    1.19    0.69
   5 -11   7    0.51    0.57
  -5 -11  -7    0.81    0.44
  -5 -11  -7   -0.18    0.20
  -5 -11  -7    0.01    0.19
  -6 -11  -7    1.59    0.44
  -6 -11  -7    1.41    0.38
  -7 -11  -7    0.27    0.32
  -8 -11  -7    0.41    0.25
   9 -12  -7    4.93    0.43
   9 -12  -7    4.63    0.42
   8 -12  -7    3.23    0.46
   8 -12  -7    2.49    0.56
   8 -12  -7    3.23    0.48
  -8 -12   7    3.70    0.44
   7 -12  -7    2.43    0.63
   7 -12  -7    1.95    0.53
  -7 -12   7    1.88    0.45
   7 -12  -7    2.57    0.50
   7 -12  -7    2.10    0.45
  -6 -12   7    2.83    0.50
   6 -12  -7    3.60    0.61
   6 -12  -7    4.61    0.55
   6 -12  -7    2.86    0.53
   6 -12  -7    3.51    0.68
   6 -12  -7    3.10    0.70
   5 -12  -7   11.93    1.00
   5 -12  -7   12.48    1.09
  -5 -12   7   11.29    0.95
   5 -12  -7   12.02    1.13
   5 -12  -7   11.39    0.96
   4 -12  -7    9.56    0.83
  -4 -12   7    8.17    0.59
   4 -12  -7    8.67    0.85
  -4 -12   7    8.43    0.81
  -4 -12   7    8.18    0.78
   4 -12  -7   10.35    0.99
   4 -12  -7    7.99    0.88
   3 -12  -7    1.94    0.48
  -3 -12   7    1.01    0.44
   3 -12  -7    1.45    0.55
   3 -12  -7    1.60    0.54
  -3 -12   7    1.56    0.46
   3 -12  -7    2.13    0.60
  -3 -12   7    1.47    0.26
  -3 -12   7    2.05    0.57
   3 -12  -7    1.64    0.16
  -2 -12   7   37.87    2.46
   2 -12  -7   40.90    1.79
  -2 -12   7   38.13    2.10
  -2 -12   7   36.72    1.78
  -2 -12   7   34.02    2.22
   2 -12  -7   38.09    1.79
   2 -12  -7   33.99    2.08
  -2 -12   7   36.14    2.58
   2 -12  -7   35.21    2.27
   2 -12  -7   39.54    2.28
  -2 -12   7   33.05    1.88
  -1 -12   7    0.83    0.53
   1 -12  -7    0.77    0.21
   1 -12  -7    0.73    0.24
   1 -12  -7    0.77    0.49
  -1 -12   7    0.91    0.44
  -1 -12   7    1.46    0.70
   1 -12  -7    0.99    0.42
  -1 -12   7    1.34    0.47
   1 -12  -7    0.74    0.48
   0 -12  -7   -0.08    0.21
   0 -12  -7   -0.16    0.43
   0 -12  -7    0.13    0.37
   0 -12   7   -0.70    0.41
   0 -12  -7    0.16    0.45
   0 -12   7   -0.26    0.40
   0 -12   7    0.37    0.66
   0 -12   7   -0.14    0.49
   0 -12  -7   -0.04    0.20
   1 -12   7    4.64    0.32
  -1 -12  -7    4.84    0.40
  -1 -12  -7    3.82    0.57
  -1 -12  -7    4.48    0.38
   1 -12   7    5.63    0.99
   1 -12   7    3.96    0.60
   1 -12   7    2.98    0.65
   1 -12   7    5.61    0.69
  -1 -12  -7    4.61    0.69
  -2 -12  -7    0.34    0.19
   2 -12   7    0.20    0.51
  -2 -12  -7    0.17    0.21
  -2 -12  -7    0.61    0.48
  -2 -12  -7    0.00    0.40
   2 -12   7   -0.04    0.16
   2 -12   7    0.13    0.44
   2 -12   7    0.39    0.69
   2 -12   7    0.17    0.44
   2 -12   7    0.33    0.15
   3 -12   7    4.67    0.71
  -3 -12  -7    4.60    0.61
   3 -12   7    4.86    0.39
   3 -12   7    4.28    0.63
   3 -12   7    3.33    0.84
  -3 -12  -7    5.52    0.73
  -3 -12  -7    4.98    0.32
  -3 -12  -7    4.67    0.32
  -4 -12  -7    0.07    0.39
   4 -12   7    1.19    0.48
   4 -12   7    0.81    0.29
   4 -12   7    0.46    0.20
   4 -12   7    0.60    0.60
  -5 -12  -7    3.63    0.54
   5 -12   7    3.68    0.35
  -6 -12  -7    1.36    0.30
  -6 -12  -7    0.80    0.37
  -7 -12  -7   20.22    1.19
   8 -13  -7    0.66    0.29
   8 -13  -7    0.77    0.43
   8 -13  -7    0.68    0.28
   7 -13  -7    3.07    0.45
   7 -13  -7    4.76    0.62
   7 -13  -7    3.20    0.63
   7 -13  -7    5.08    0.52
  -7 -13   7    3.90    0.47
   6 -13  -7    8.93    0.79
   6 -13  -7    9.22    0.96
   6 -13  -7    9.15    0.94
  -6 -13   7   10.58    0.83
   6 -13  -7   10.53    0.81
   5 -13  -7    2.08    0.44
   5 -13  -7    1.27    0.60
  -5 -13   7    1.68    0.45
   5 -13  -7    0.90    0.43
   5 -13  -7    1.21    0.57
   4 -13  -7   17.64    1.50
  -4 -13   7   16.91    1.00
   4 -13  -7   19.02    1.40
   4 -13  -7   18.32    1.23
   4 -13  -7   16.81    1.26
  -4 -13   7   18.93    1.22
   4 -13  -7   19.18    1.23
  -3 -13   7    9.35    0.90
   3 -13  -7   10.82    1.02
   3 -13  -7    9.50    0.91
  -3 -13   7   10.92    1.04
  -3 -13   7   11.08    0.92
   3 -13  -7   10.44    0.88
  -3 -13   7   10.19    0.62
   3 -13  -7   11.18    0.91
  -2 -13   7   12.29    1.09
  -2 -13   7    9.29    0.56
   2 -13  -7   11.66    0.92
   2 -13  -7   12.89    1.00
  -2 -13   7    8.80    1.09
   2 -13  -7   10.76    0.96
  -2 -13   7   10.81    0.92
  -2 -13   7    8.20    0.55
  -2 -13   7    9.62    0.90
   2 -13  -7   10.23    0.86
   1 -13  -7   18.95    1.41
  -1 -13   7   20.34    1.34
   1 -13  -7   20.36    1.58
   1 -13  -7   22.34    1.43
   1 -13  -7   19.80    1.32
  -1 -13   7   20.78    1.75
  -1 -13   7   18.75    1.39
  -1 -13   7   19.48    1.56
   0 -13  -7    0.97    0.43
   0 -13   7    1.39    0.59
   0 -13  -7    0.85    0.48
   0 -13   7    1.40    0.73
   0 -13   7    1.23    0.49
   0 -13   7    1.27    0.49
   1 -13   7    9.86    0.87
  -1 -13  -7    8.54    0.78
   1 -13   7    8.95    0.95
   1 -13   7    7.78    0.48
  -1 -13  -7    9.73    0.88
   1 -13   7    7.75    0.48
   1 -13   7    8.30    0.79
   1 -13   7    7.55    1.07
   2 -13   7    1.77    0.50
  -2 -13  -7    2.32    0.49
   2 -13   7    1.70    0.73
   2 -13   7    2.19    0.51
   2 -13   7    1.47    0.25
   2 -13   7    1.53    0.20
   2 -13   7    1.68    0.58
  -2 -13  -7    1.51    0.50
   2 -13   7    1.48    0.21
  -3 -13  -7    3.27    0.54
  -3 -13  -7    4.53    0.60
   3 -13   7    2.61    0.73
   3 -13   7    2.52    0.33
   3 -13   7    3.57    0.31
   3 -13   7    3.16    0.61
   4 -13   7   11.76    1.17
   4 -13   7   11.80    0.73
   4 -13   7   12.36    1.03
  -4 -13  -7   14.70    0.98
   4 -13   7   11.51    0.73
   5 -13   7    0.46    0.17
  -5 -13  -7    0.67    0.36
  -6 -13  -7   15.34    0.97
  -7 -13  -7   17.94    1.03
   7 -14  -7    0.39    0.37
   7 -14  -7    0.36    0.28
   7 -14  -7    0.47    0.27
  -7 -14   7    0.32    0.28
   7 -14  -7    0.40    0.42
   6 -14  -7    5.78    0.73
  -6 -14   7    7.14    0.62
   6 -14  -7    5.94    0.73
   6 -14  -7    6.61    0.58
   5 -14  -7   24.48    1.43
  -5 -14   7   23.70    1.43
   5 -14  -7   24.72    1.65
   5 -14  -7   23.62    1.72
   4 -14  -7    3.81    0.65
   4 -14  -7    2.92    0.66
   4 -14  -7    3.31    0.50
  -4 -14   7    3.87    0.54
   4 -14  -7    2.74    0.46
   3 -14  -7   19.22    1.46
   3 -14  -7   18.86    1.33
   3 -14  -7   16.68    1.18
  -3 -14   7   17.98    1.19
  -3 -14   7   16.55    1.19
  -3 -14   7   16.83    0.93
   3 -14  -7   16.90    1.15
  -2 -14   7    9.80    0.80
   2 -14  -7    7.13    0.88
   2 -14  -7    8.24    0.74
  -2 -14   7    8.16    0.47
   2 -14  -7    9.68    0.77
  -2 -14   7   10.06    0.96
  -2 -14   7    6.94    0.73
  -2 -14   7    6.77    0.93
   2 -14  -7    9.64    0.87
  -2 -14   7    6.71    0.46
  -1 -14   7    8.22    0.79
  -1 -14   7    6.93    0.86
   1 -14  -7    9.11    0.78
   1 -14  -7    7.71    0.70
  -1 -14   7    8.09    1.01
   1 -14  -7    7.83    0.89
  -1 -14   7    6.10    0.71
   0 -14  -7    3.60    0.54
   0 -14   7    2.96    0.55
   0 -14   7    2.66    0.75
   0 -14   7    3.22    0.55
   0 -14  -7    3.63    0.52
   0 -14   7    3.35    0.66
  -1 -14  -7    0.58    0.40
   1 -14   7    0.48    0.52
   1 -14   7    0.34    0.62
   1 -14   7    0.77    0.46
   1 -14   7    0.43    0.43
   1 -14   7    0.54    0.11
  -1 -14  -7    0.57    0.39
   1 -14   7    0.54    0.13
   2 -14   7   14.16    0.76
   2 -14   7   14.07    0.78
  -2 -14  -7   16.15    1.05
   2 -14   7   13.37    1.37
   2 -14   7   14.67    0.80
   2 -14   7   14.91    1.24
  -2 -14  -7   14.85    1.03
   2 -14   7   17.28    1.09
   3 -14   7    3.46    0.29
   3 -14   7    2.95    0.70
   3 -14   7    3.92    0.62
   3 -14   7    2.93    0.32
  -3 -14  -7    4.29    0.51
   4 -14   7    0.38    0.40
   4 -14   7    0.60    0.15
  -4 -14  -7    1.14    0.37
   4 -14   7    0.51    0.44
  -5 -14  -7   31.51    1.74
  -6 -14  -7    3.85    0.38
   6 -15  -7    2.82    0.50
   6 -15  -7    2.64    0.34
   6 -15  -7    2.79    0.33
   6 -15  -7    3.22    0.51
  -6 -15   7    3.07    0.39
   5 -15  -7    1.99    0.53
   5 -15  -7    2.23    0.53
  -5 -15   7    1.50    0.38
   5 -15  -7    2.19    0.34
   4 -15  -7    2.33    0.59
   4 -15  -7    3.22    0.58
  -4 -15   7    2.51    0.46
   4 -15  -7    2.91    0.40
  -3 -15   7   26.16    1.52
   3 -15  -7   27.64    1.68
  -3 -15   7   22.05    1.53
   3 -15  -7   26.34    1.47
   3 -15  -7   25.85    1.81
  -2 -15   7   24.38    1.59
   2 -15  -7   22.66    1.62
   2 -15  -7   23.32    1.49
  -2 -15   7   18.54    1.12
  -2 -15   7   20.53    1.38
  -2 -15   7   24.88    1.38
   2 -15  -7   23.43    1.31
   1 -15  -7    3.24    0.61
  -1 -15   7    3.51    0.52
  -1 -15   7    2.88    0.53
   1 -15  -7    3.02    0.44
  -1 -15   7    3.20    0.62
   0 -15   7    2.65    0.49
   0 -15   7    2.34    0.58
   0 -15   7    2.63    0.71
   0 -15  -7    2.76    0.43
   0 -15   7    2.79    0.50
   1 -15   7    7.14    0.94
   1 -15   7    8.31    0.86
   1 -15   7    7.23    0.69
  -1 -15  -7    8.44    0.71
   2 -15   7    0.06    0.51
   2 -15   7    0.00    0.09
   2 -15   7    0.11    0.08
   2 -15   7    0.14    0.12
   2 -15   7    0.37    0.45
  -2 -15  -7    0.16    0.31
   3 -15   7    3.83    0.68
   3 -15   7    4.74    0.60
  -3 -15  -7    5.27    0.50
   3 -15   7    4.87    0.31
  -4 -15  -7    0.27    0.26
   4 -15   7    0.39    0.34
  -5 -15  -7    1.28    0.24
   5 -16  -7    0.03    0.36
   5 -16  -7    0.17    0.19
  -5 -16   7    0.12    0.26
   5 -16  -7   -0.08    0.37
  -4 -16   7    3.39    0.42
   4 -16  -7    1.87    0.51
   4 -16  -7    2.26    0.46
   4 -16  -7    2.80    0.32
  -3 -16   7    9.44    0.77
   3 -16  -7   10.42    0.95
   3 -16  -7    9.13    0.66
   3 -16  -7   10.18    0.82
  -2 -16   7    6.73    0.71
   2 -16  -7    7.10    0.58
   2 -16  -7    7.20    0.78
  -2 -16   7    6.62    0.63
   1 -16  -7    5.30    0.48
   1 -16  -7    4.99    0.67
  -1 -16   7    4.95    0.64
  -1 -16   7    5.10    0.55
   0 -16  -7    0.99    0.29
   0 -16   7    0.19    0.43
   0 -16   7    1.16    0.38
  -1 -16  -7   12.07    0.77
   1 -16   7   10.90    0.82
   1 -16   7   11.61    0.98
  -2 -16  -7    0.38    0.26
   2 -16   7   -0.39    0.37
   3 -16   7    1.22    0.37
  -3 -16  -7    1.68    0.28
  -4 -16  -7    0.95    0.20
   4 -17  -7   10.42    0.85
   3 -17  -7    1.26    0.39
  -3 -17   7    0.72    0.28
  -2 -17   7   -0.21    0.30
  -2 -17   7    0.45    0.28
   2 -17  -7    0.18    0.37
   2 -17  -7    0.12    0.18
  -1 -17   7    0.55    0.29
   1 -17  -7    0.55    0.20
  -1 -17   7    1.02    0.38
   0 -17   7    1.43    0.39
   0 -17  -7    1.09    0.22
   0 -17   7    0.83    0.29
  -1 -17  -7    0.12    0.17
   1 -17   7    0.34    0.33
   2 -17   7    7.66    0.67
 -11   0   8   10.25    0.80
 -10   0   8   20.89    1.42
 -10   0   8   19.99    1.33
 -10   0   8   19.56    1.33
  -9   0   8   81.25    4.82
  -9   0   8   89.97    4.77
  -9   0   8   86.64    4.50
  -9   0   8   88.57    4.01
  -9   0   8   82.64    4.67
  -9   0   8   85.24    4.93
  -8   0   8   16.71    1.00
  -8   0   8   17.88    1.42
  -8   0   8   17.51    1.33
  -8   0   8   19.64    1.43
  -8   0   8   18.58    1.34
  -8   0   8   17.84    1.24
  -7   0   8   26.45    1.79
  -7   0   8   26.02    1.61
  -7   0   8   23.95    1.70
  -7   0   8   30.48    1.83
  -7   0   8   25.91    1.40
  -7   0   8   26.51    1.71
  -6   0   8   22.13    1.16
  -6   0   8   19.56    1.40
  -6   0   8   19.61    1.48
  -6   0   8   23.99    1.51
  -5   0   8    2.05    0.39
  -5   0   8    1.20    0.36
  -5   0   8    0.99    0.22
  -4   0   8   43.07    2.32
  -4   0   8   40.67    2.01
  -4   0   8   40.84    2.43
  -4   0   8   39.80    2.33
  -3   0   8   12.51    0.91
  -3   0   8   12.91    0.88
  -2   0   8   31.80    1.88
  -1   0   8  317.57   21.10
  -1   0   8  324.61   17.30
   0   0   8    1.41    0.55
   0   0   8    1.24    0.27
   1   0   8   38.56    1.86
   1   0   8   38.80    2.26
   2   0   8  150.74    7.22
   2   0   8  156.67    8.47
   2   0   8  157.67    7.23
   3   0   8    1.27    0.21
   3   0   8    1.65    0.38
   3   0   8    1.18    0.20
   3   0   8    1.12    0.34
   4   0   8    7.89    0.73
   4   0   8    6.71    0.48
   4   0   8    6.34    0.67
   4   0   8    7.73    0.48
   5   0   8    1.16    0.20
   5   0   8    1.09    0.39
   5   0   8    1.38    0.19
   5   0   8    1.61    0.42
   5   0   8    1.22    0.42
   5   0   8    1.19    0.45
   6   0   8    3.01    0.53
   6   0   8    2.73    0.50
   6   0   8    2.65    0.50
   6   0   8    2.25    0.55
   7   0   8    5.11    0.69
   7   0   8    5.45    0.64
   7   0   8    3.80    0.59
   7   0   8    5.24    0.65
   8   0   8    6.54    0.66
   8   0   8    7.40    0.73
   8   0   8    5.50    0.63
   9   0   8   69.41    3.76
  -9   0  -8   74.28    3.67
   9   0   8   58.78    3.66
   9   0   8   71.41    3.42
   9   0   8   71.28    3.56
  10   0   8    0.61    0.21
 -11  -1   8   17.56    1.08
 -11   1   8   16.80    1.11
 -11   1   8   16.74    1.19
 -10  -1   8   27.43    1.71
  10  -1  -8   25.80    1.47
 -10  -1   8   26.26    1.63
 -10  -1   8   26.65    1.61
 -10   1   8   26.71    1.70
 -10   1   8   29.07    1.82
 -10   1   8   29.54    1.84
 -10   1   8   28.38    1.67
  -9  -1   8    2.67    0.52
  -9  -1   8    2.65    0.53
  -9  -1   8    2.81    0.63
  -9  -1   8    2.22    0.52
  -9   1   8    1.24    0.53
  -9   1   8    2.11    0.34
  -9   1   8    2.55    0.62
  -9   1   8    2.84    0.56
  -9   1   8    2.04    0.54
  -9   1   8    1.99    0.68
  -8  -1   8    1.72    0.47
  -8  -1   8    1.79    0.50
  -8  -1   8    2.15    0.60
  -8  -1   8    1.31    0.51
  -8  -1   8    2.11    0.50
  -8   1   8    3.73    0.69
  -8   1   8    2.07    0.54
  -8   1   8    1.91    0.37
  -8   1   8    1.52    0.63
  -8   1   8    1.64    0.52
  -8   1   8    2.36    0.51
  -7  -1   8    6.75    0.80
  -7  -1   8    9.18    0.54
  -7  -1   8    6.58    0.76
  -7  -1   8    6.39    0.68
  -7  -1   8    9.48    0.82
  -7  -1   8    9.00    0.84
  -7  -1   8    7.80    0.51
  -7   1   8    9.51    0.97
  -7   1   8    5.98    0.74
  -7   1   8    7.75    0.64
  -7   1   8    8.31    0.91
  -7   1   8    7.58    0.75
  -7   1   8    8.41    0.81
  -6  -1   8   13.32    1.09
  -6  -1   8   13.54    0.99
  -6  -1   8   14.71    0.76
  -6  -1   8   12.30    0.72
  -6  -1   8   13.73    1.06
  -6   1   8   11.95    0.82
  -6   1   8   12.79    1.14
  -6   1   8   12.97    1.05
  -6   1   8   12.43    1.12
  -5  -1   8    8.97    0.52
  -5  -1   8    8.47    0.74
  -5  -1   8    9.64    0.76
  -5  -1   8    7.74    0.49
  -5   1   8    7.70    0.60
  -5   1   8    8.47    0.84
  -5   1   8    8.20    0.76
  -4  -1   8    3.36    0.42
  -4  -1   8    3.49    0.42
  -4  -1   8    2.94    0.38
  -4  -1   8    3.62    0.28
  -4   1   8    3.87    0.51
  -4   1   8    3.87    0.51
  -4   1   8    2.77    0.42
  -4   1   8    3.33    0.35
  -3  -1   8  163.71    8.38
  -3  -1   8  168.12    7.48
  -3  -1   8  156.66    8.79
  -3   1   8  155.88    8.43
  -3   1   8  164.73    8.87
  -2  -1   8    5.55    0.48
  -2   1   8    4.36    0.93
  -2   1   8    6.11    0.58
  -1  -1   8    9.88    0.71
  -1   1   8   11.41    0.83
  -1   1   8   11.95    1.48
   0  -1   8   27.11    1.60
   0   1   8   29.04    1.70
   0   1   8   25.91    2.35
   1  -1   8   31.80    1.95
   1   1   8   36.61    2.06
   2  -1   8   16.15    1.08
   2   1   8   15.79    1.13
   2   1   8   16.32    0.93
   2   1   8   18.58    1.18
   3  -1   8   64.40    3.55
   3  -1   8   61.94    3.41
   3   1   8   62.24    3.06
   3   1   8   63.37    3.62
   3   1   8   62.91    3.49
   4  -1   8    1.58    0.38
   4  -1   8    1.16    0.33
   4   1   8    1.44    0.29
   4   1   8    0.91    0.41
   4   1   8    1.49    0.44
   5  -1   8   22.19    1.43
   5  -1   8   24.11    1.44
   5  -1   8   22.59    1.36
   5  -1   8   20.69    1.30
   5   1   8   21.44    1.39
   5   1   8   19.83    1.18
   5   1   8   23.06    1.55
   5   1   8   21.70    1.55
   5   1   8   20.16    1.34
   6  -1   8    1.41    0.40
   6  -1   8    1.62    0.46
   6  -1   8    1.96    0.46
   6  -1   8    1.36    0.41
   6   1   8    1.51    0.27
   6   1   8    1.53    0.56
   6   1   8    1.66    0.48
   6   1   8    1.70    0.29
   6   1   8    0.89    0.45
   6   1   8    1.90    0.53
   7  -1   8   11.66    0.98
   7  -1   8   12.14    1.00
   7  -1   8   12.36    0.94
   7   1   8   11.99    1.03
   7   1   8   13.15    1.15
   7   1   8   12.79    1.09
   7   1   8   12.56    1.03
   8  -1   8    8.80    0.83
   8  -1   8   12.00    0.86
   8  -1   8   11.59    0.90
   8   1   8   11.37    0.90
   8   1   8   10.35    0.93
   8   1   8   12.03    0.91
   8   1   8   10.48    0.97
   9  -1   8   -0.01    0.30
   9  -1   8   -0.26    0.30
   9  -1   8    0.04    0.36
   9   1   8    0.84    0.34
   9   1   8    0.17    0.34
   9   1   8    0.47    0.35
  -9   1  -8    0.17    0.26
   9   1   8    0.69    0.41
  10  -1   8   11.35    0.68
  10   1   8   11.14    0.70
 -11  -2   8    0.76    0.32
 -11   2   8    0.33    0.34
 -10  -2   8    0.57    0.39
 -10   2   8    0.42    0.44
 -10   2   8    0.28    0.46
 -10   2   8    0.74    0.44
 -10   2   8    0.62    0.57
 -10   2   8   -0.04    0.40
 -10   2   8    0.28    0.22
  -9  -2   8    3.40    0.52
  -9  -2   8    4.66    0.67
  -9  -2   8    4.57    0.55
  -9  -2   8    3.81    0.56
  -9   2   8    4.95    0.78
  -9   2   8    3.96    0.66
  -9   2   8    5.33    0.69
  -9   2   8    5.52    0.72
  -9   2   8    4.71    0.51
  -9   2   8    4.15    0.73
  -8  -2   8    8.00    0.84
  -8  -2   8    7.42    0.72
  -8  -2   8    7.29    0.79
  -8  -2   8    7.18    0.70
  -8  -2   8    6.43    0.70
  -8   2   8    7.67    0.92
  -8   2   8    5.40    0.57
  -8   2   8    6.51    0.75
  -8   2   8    7.56    0.80
  -8   2   8    4.37    0.71
  -8   2   8    6.62    0.93
  -7  -2   8    6.68    0.74
  -7  -2   8    7.94    0.80
  -7  -2   8    8.77    0.73
  -7  -2   8    8.20    0.74
  -7  -2   8    6.53    0.63
  -7   2   8    5.37    0.69
  -7   2   8    7.01    0.88
  -7   2   8    8.02    0.87
  -7   2   8    5.55    0.68
  -7   2   8    5.56    0.72
  -6  -2   8   -0.13    0.38
  -6  -2   8    0.31    0.30
  -6  -2   8    0.96    0.33
  -6   2   8    0.07    0.36
  -6   2   8    0.31    0.44
  -6   2   8    0.43    0.36
  -6   2   8    0.41    0.41
  -5  -2   8    7.53    0.62
  -5  -2   8    6.97    0.61
  -5  -2   8    6.56    0.61
  -5   2   8    5.81    0.70
  -5   2   8    5.28    0.63
  -5   2   8    5.99    0.69
  -4  -2   8    2.25    0.30
  -4  -2   8    2.45    0.35
  -4  -2   8    1.44    0.27
  -4   2   8    1.71    0.37
  -4   2   8    1.40    0.39
  -4   2   8    1.48    0.37
  -3  -2   8    1.37    0.23
  -3  -2   8    2.26    0.27
  -3   2   8    1.69    0.36
  -3   2   8    1.21    0.34
  -2   2   8   43.24    3.48
  -2   2   8   42.54    2.54
  -1   2   8   65.67    3.58
  -1   2   8   57.00    4.64
   0   2   8   89.49    4.90
   0   2   8   84.05    6.25
   1   2   8    6.48    0.66
   2   2   8    3.31    0.50
   2   2   8    4.72    0.55
   3  -2   8    2.13    0.35
   3   2   8    2.83    0.48
   3   2   8    2.93    0.49
   3   2   8    3.54    0.42
   4  -2   8    0.21    0.29
   4   2   8    0.04    0.25
   4   2   8   -0.15    0.33
   4   2   8    0.28    0.40
   4   2   8    0.75    0.43
   5  -2   8   34.44    2.04
   5  -2   8   34.21    1.97
   5  -2   8   35.75    1.89
   5   2   8   36.77    1.99
   5   2   8   38.21    2.31
   5   2   8   35.55    1.88
   5   2   8   34.00    2.05
   5   2   8   34.52    2.22
   6  -2   8   13.96    0.97
   6  -2   8   12.03    0.99
   6  -2   8   13.86    1.01
   6   2   8   13.65    1.08
   6   2   8   14.36    0.89
   6   2   8   13.19    1.22
   6   2   8   14.72    1.22
   6   2   8   13.25    1.09
   7  -2   8   -0.17    0.34
   7  -2   8    0.29    0.38
   7  -2   8    0.22    0.35
   7   2   8   -0.28    0.50
   7   2   8   -0.08    0.42
   7   2   8   -0.29    0.23
   7   2   8   -0.24    0.46
   7   2   8    0.73    0.49
   7   2   8    0.40    0.24
   8  -2   8    1.25    0.41
  -8  -2  -8    1.55    0.31
   8  -2   8    1.60    0.50
   8  -2   8    1.66    0.40
   8   2   8    2.46    0.51
   8   2   8    0.96    0.48
   8   2   8    1.95    0.49
   8   2   8    1.66    0.58
   8   2   8    1.04    0.42
   9  -2   8    1.09    0.32
   9  -2   8    1.05    0.31
   9  -2   8    1.31    0.37
   9   2   8    0.32    0.35
   9   2   8    0.64    0.43
   9   2   8    0.87    0.36
   9   2   8    0.29    0.36
  10   2   8    8.11    0.58
 -11  -3   8    0.85    0.30
 -11   3   8    0.26    0.34
  10  -3  -8    3.54    0.75
 -10  -3   8    3.21    0.47
 -10   3   8    3.86    0.68
 -10   3   8    3.31    0.38
 -10   3   8    3.71    0.57
 -10   3   8    3.82    0.61
 -10   3   8    2.57    0.59
 -10   3   8    3.31    0.59
 -10   3   8    3.99    0.71
  -9  -3   8    4.57    0.57
   9  -3  -8    6.03    0.97
  -9  -3   8    5.40    0.68
   9  -3  -8    4.49    0.37
  -9   3   8    5.15    0.73
  -9   3   8    5.45    0.71
  -9   3   8    6.03    0.71
  -9   3   8    3.04    0.73
  -9   3   8    3.99    0.75
   8  -3  -8    2.81    0.78
  -8  -3   8    1.52    0.35
  -8  -3   8    1.40    0.49
  -8  -3   8    1.36    0.50
  -8  -3   8    1.30    0.41
  -8   3   8    1.50    0.55
  -8   3   8    1.68    0.66
  -8   3   8    1.94    0.64
  -8   3   8    0.95    0.50
  -8   3   8    0.81    0.47
  -7  -3   8    0.23    0.33
  -7  -3   8    1.02    0.32
  -7  -3   8    0.36    0.29
  -7  -3   8    0.50    0.42
  -7  -3   8    0.44    0.43
  -7   3   8    0.33    0.41
  -7   3   8    0.85    0.43
  -7   3   8    0.42    0.50
  -7   3   8   -0.20    0.50
  -7   3   8   -0.47    0.40
  -6  -3   8    2.85    0.52
  -6  -3   8    2.44    0.39
  -6  -3   8    2.73    0.51
  -6  -3   8    2.74    0.38
  -6  -3   8    2.83    0.36
  -6   3   8    2.77    0.63
  -6   3   8    2.11    0.51
  -6   3   8    3.05    0.52
  -6   3   8    2.29    0.55
  -5  -3   8   27.99    1.61
  -5  -3   8   27.99    1.52
  -5   3   8   26.03    1.86
  -5   3   8   28.26    1.75
  -5   3   8   27.65    1.81
  -5   3   8   25.62    1.75
  -4   3   8    1.01    0.35
  -4   3   8    1.15    0.41
  -4   3   8    1.65    0.40
  -3   3   8    4.34    0.56
  -3   3   8    4.01    0.52
  -3   3   8    3.25    0.52
  -2   3   8    1.46    0.37
  -2   3   8    0.87    0.32
  -1   3   8   46.82    2.78
   0   3   8   30.35    1.95
   0   3   8   32.23    1.89
   1  -3   8    1.70    0.24
   1   3   8    1.70    0.40
   2   3   8    1.19    0.41
   2   3   8    1.06    0.39
   3   3   8    0.20    0.37
   3   3   8    0.28    0.36
   3   3   8    0.33    0.36
   4   3   8    3.09    0.61
   4   3   8    3.45    0.61
   4   3   8    4.24    0.56
   4   3   8    3.15    0.56
   5  -3   8    4.37    0.47
   5  -3   8    3.43    0.44
   5   3   8    5.22    0.76
   5   3   8    3.87    0.58
   5   3   8    3.99    0.73
   5   3   8    3.55    0.58
   6  -3   8   -0.11    0.32
   6  -3   8    0.21    0.33
   6   3   8    0.19    0.46
   6   3   8    0.34    0.51
   6   3   8    0.17    0.43
   6   3   8   -0.25    0.53
   6   3   8    0.28    0.33
  -7  -3  -8    0.69    0.32
   7  -3   8    0.51    0.37
   7  -3   8    0.61    0.35
   7   3   8    0.85    0.51
   7   3   8    1.44    0.61
   7   3   8    0.66    0.32
   7   3   8    0.72    0.50
   7   3   8    0.83    0.45
   8  -3   8    0.40    0.31
   8  -3   8    0.39    0.40
   8  -3   8   -0.28    0.32
  -8  -3  -8    0.48    0.18
   8   3   8    0.39    0.42
   8   3   8    0.21    0.43
   8   3   8   -0.39    0.35
   8   3   8    0.06    0.45
   8   3   8    0.08    0.50
   9  -3   8    1.66    0.30
   9  -3   8    1.37    0.28
   9   3   8    0.75    0.40
   9   3   8    1.67    0.45
   9   3   8    1.36    0.38
   9   3   8    1.34    0.37
  11  -4  -8    1.37    0.38
 -11  -4   8    1.82    0.31
 -11   4   8    2.34    0.41
 -10  -4   8    0.30    0.32
  10  -4  -8    0.33    0.45
  10  -4  -8    0.28    0.54
 -10   4   8    0.65    0.28
 -10   4   8    0.70    0.53
 -10   4   8    0.11    0.46
 -10   4   8    0.25    0.47
 -10   4   8    0.27    0.43
 -10   4   8    0.45    0.41
 -10   4   8    0.26    0.44
   9  -4  -8   38.18    2.67
  -9  -4   8   43.30    2.29
   9  -4  -8   41.60    2.35
   9  -4  -8   40.86    2.78
  -9   4   8   42.15    2.55
  -9   4   8   42.45    2.76
  -9   4   8   45.35    2.44
  -9   4   8   40.26    2.55
  -9   4   8   41.87    2.53
   8  -4  -8    2.96    0.78
  -8  -4   8    1.85    0.41
   8  -4  -8    2.07    0.77
  -8   4   8    2.02    0.66
  -8   4   8    2.06    0.60
  -8   4   8    2.18    0.63
  -8   4   8    2.40    0.56
  -8   4   8    2.38    0.54
   7  -4  -8   15.98    1.55
  -7  -4   8   15.83    1.24
  -7  -4   8   17.09    1.08
   7  -4  -8   17.52    1.53
  -7   4   8   17.29    1.35
  -7   4   8   16.08    1.25
  -7   4   8   17.25    1.52
  -7   4   8   18.19    1.37
  -6  -4   8   10.19    0.92
   6  -4  -8   13.41    1.31
  -6  -4   8   11.98    0.79
   6  -4  -8   10.80    1.13
  -6   4   8   12.67    1.10
  -6   4   8   12.67    1.08
  -6   4   8   10.47    1.13
  -6   4   8    9.01    1.01
  -6   4   8   11.01    0.98
   5  -4  -8    5.42    0.85
  -5   4   8    4.13    0.64
  -5   4   8    3.77    0.64
  -5   4   8    6.00    0.71
  -5   4   8    4.14    0.60
  -4   4   8   10.54    1.00
  -4   4   8   10.00    0.92
  -4   4   8   11.46    1.02
  -3   4   8    3.14    0.50
  -3   4   8    3.80    0.58
  -3   4   8    3.92    0.59
  -2  -4   8    9.58    0.60
  -2   4   8    9.33    0.85
  -2   4   8    7.38    0.81
  -1  -4   8  105.66    5.14
  -1   4   8   95.54    5.70
  -1   4   8  101.82    5.45
   0  -4   8    0.45    0.15
   0   4   8   -0.06    0.32
   0   4   8    0.43    0.32
   1  -4   8   38.62    1.96
   1   4   8   35.66    2.21
   1   4   8   35.41    2.28
   2  -4   8   15.97    0.95
   2   4   8   15.50    1.22
   2   4   8   16.31    1.25
   3   4   8   29.68    1.88
   3   4   8   26.22    1.84
   3   4   8   27.69    1.75
   4  -4   8    0.64    0.65
   4   4   8    1.59    0.53
   4   4   8    1.24    0.44
   4   4   8    1.51    0.49
   4   4   8    1.13    0.43
   4   4   8    1.45    0.53
   5  -4   8    0.71    0.30
   5   4   8    0.30    0.52
   5   4   8    0.40    0.43
   5   4   8    0.27    0.51
   5   4   8    0.68    0.49
   5   4   8   -0.13    0.37
   6  -4   8    4.64    0.49
   6   4   8    3.80    0.74
   6   4   8    3.90    0.65
   6   4   8    4.43    0.80
   6   4   8    4.00    0.66
   6   4   8    4.93    0.77
  -7  -4  -8   11.14    0.75
   7  -4   8   10.43    0.82
   7  -4   8    9.98    0.75
   7   4   8   13.69    1.14
   7   4   8   13.76    1.04
   7   4   8   10.57    0.97
   7   4   8   10.98    0.81
   7   4   8   12.23    1.13
   7   4   8   10.05    1.09
   8  -4   8   16.72    1.00
   8   4   8   17.74    1.30
   8   4   8   16.43    1.15
   8   4   8   15.26    0.88
   8   4   8   15.46    0.87
   8   4   8   16.44    1.21
   8   4   8   14.64    1.22
   8   4   8   16.34    1.12
   9  -4   8    7.09    0.52
   9   4   8    7.79    0.64
   9   4   8    7.63    0.66
   9   4   8    7.42    0.70
 -11  -5   8   11.40    0.69
  11  -5  -8   11.36    0.80
 -11   5   8   10.37    0.78
  10  -5  -8    4.29    0.75
 -10  -5   8    3.80    0.44
  10  -5  -8    4.79    0.64
[truncated: 13,839,481 more chars]
